# Supplementary material for: Development of a Material Design Space for 4D-Printed Bio-Inspired Hygroscopically Actuated Bilayer Structures with Unequal Effective Layer Widths
Source: MDPI journal article supplement (doi:10.3390/biomimetics6040058), 2021-10-06
Supplement: s1 [file s1]

## Measurement of Young's modulus from tensile tests

### 1. Materials and methods

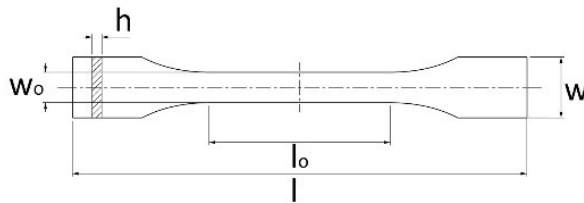

**Figure 1: Sample geometry for tensile tests. Samples consisted of single material. Sample geometry corresponds to sample type 1BA of DIN EN 527 with a differing thickness of 1.6 mm.**

The tensile moduli of Laywood meta 5 and PLA in all three states were determined according to DIN EN 527-2 (Table 1) on eight printed tensile bars for each material and state (Figure 1) using a universal testing machine (inspect table 5, Hegewald & Peschke Mess- und Prüftechnik GmbH, Nossen, Germany). Humidity was adjusted using a temperature chamber (T56 LN2, mytron Bio- und Solartechnik GmbH, Heilbad Heiligenstadt, Germany) where water vapour or nitrogen were introduced.

**Table 1: Parameters for tensile tests. Non-specified parameters were chosen in accordance with DIN EN 527. Tests were performed on a universal testing machine, using a temperature chamber to control environmental conditions.**

|                           | Laywood meta 5                     | PLA          |
|---------------------------|------------------------------------|--------------|
| <b>Test speed</b>         | 0.6 mm/min                         | 0.6 mm/min   |
| <b>Final Displacement</b> | 0.87 mm (wet), 0.3 mm (dry, humid) | 0.3 mm       |
| <b>Load cell</b>          | 100 N (wet), 1000 N (dry, humid)   | 1000 N       |
| <b>Printing direction</b> | transversal                        | longitudinal |

## 2. Results

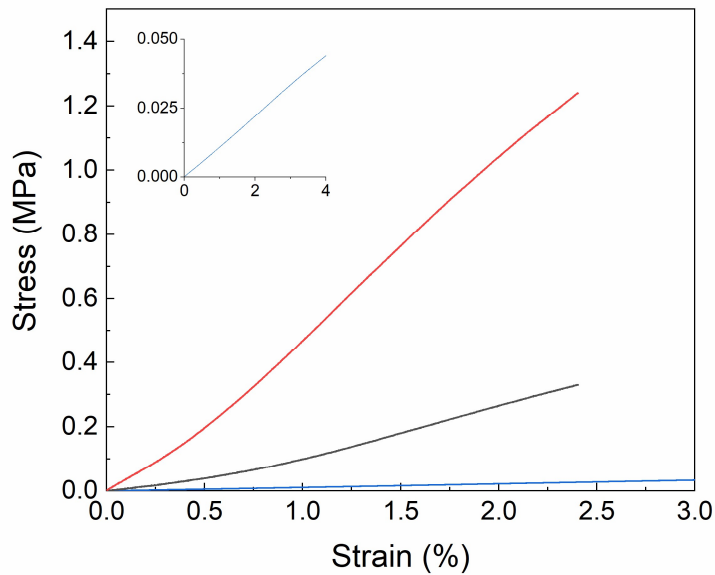

**Figure 2: Exemplary curves from tensile tests for Laywood meta 5. Blue: Wet state. Green: Humid state. Red: Dry state. Young's modulus decreases with water uptake. The linear range ends at about 2% strain.**

Values for Young's moduli are very different between Laywood and PLA with the ratio of Young's moduli  $n$  in the range between 20 and 60 for dry and humid state respectively (Table 2). For tensile moduli, an approximately 60-fold increase from wet to dry state can be seen in Laywood. The tensile moduli for PLA show a small increase from wet to dry state. Due to a more similar stress state, the flexural moduli were used for calculations of bilayer deflections and curvatures.

**Table 2: Young's moduli in all states. Measurements given as median (IQR). N = 8**

|                   | Tensile modulus in MPa |            |            |
|-------------------|------------------------|------------|------------|
|                   | Wet                    | Humid      | Dry        |
| <b>Filament 1</b> | 1.2 (0.2)              | 17.1 (1.1) | 56.8 (4.6) |
| <b>Filament 2</b> | 0.8 (0.1)              | 17.9 (3.2) | 63.4 (7.3) |
| <b>PLA</b>        | 1008 (19)              | 1078 (26)  | 1070 (24)  |
