# Supplementary material for: Development of a Material Design Space for 4D-Printed Bio-Inspired Hygroscopically Actuated Bilayer Structures with Unequal Effective Layer Widths
Source: Biomimetics (Basel). 2021 Oct 6;6(4):58. doi: 10.3390/biomimetics6040058 (PMC8544213; doi:10.3390/biomimetics6040058)
Supplement: Supplementary file 1 [file biomimetics-06-00058-s001.zip]

Archive with 9 entries (9 files):
- Krueger_Thierer_et_al/Raw_Bilayers_designspace.mw
- Krueger_Thierer_et_al/Raw_Values_Bilayers_A.xlsx
- Krueger_Thierer_et_al/Raw_Values_Bilayers_B.xlsx
- Krueger_Thierer_et_al/Raw_Values_Bilayers_C.xlsx
- Krueger_Thierer_et_al/Raw_Values_PLA_Monolayer.xlsx
- Krueger_Thierer_et_al/S1_Tensile_tests.pdf
- Krueger_Thierer_et_al/S2_Values_Laywood_monolayer.xlsx
- Krueger_Thierer_et_al/S3_Bilayers_strain_distribution_maximum.pdf
- Krueger_Thierer_et_al/S4_Bilayers_strain_distribution_thick_bilayers.pdf
