# Supplementary material for: Development of a Material Design Space for 4D-Printed Bio-Inspired Hygroscopically Actuated Bilayer Structures with Unequal Effective Layer Widths
Source: Biomimetics (Basel). 2021 Oct 6;6(4):58. doi: 10.3390/biomimetics6040058 (PMC8544213; doi:10.3390/biomimetics6040058)
Supplement: Supplementary file 1 [file biomimetics-06-00058-s001.zip › Krueger_Thierer_et_al/Raw_Bilayers_designspace.mw]

<?xml version="1.0" encoding="UTF-8"?>
<Worksheet>
<Version major="2021" minor="0"/>
<Label-Scheme value="2" prefix=""/>
<View-Properties presentation="false" autoexpanding_sections="true" UserProfileName="Maple Default Profile" NumericFormat-ApplyInteger="true" NumericFormat-ApplyRational="true" NumericFormat-ApplyExponent="false" editable="true">
</View-Properties>
<MapleNet-Properties prettyprint="3" warnlevel="3" compactdisplay="false" preplot="" helpbrowser="standard" displayprecision="-1" echo="1" scientificx="true" unitattributes="&quot;fontweight&quot; = &quot;bold&quot;" imaginaryunit="I" longdelim="true" elisiontermsthreshold="10000" elisiondigitsafter="100" elisiondigitsbefore="100" plotdevice="inline" errorbreak="1" plotoptions="" plotdriver="opengl" quiet="false" elisiontermsbefore="100" elisiontermsafter="100" historytimestamp="false" screenwidth="79" indentamount="4" plotoutput="terminal" screenpixelheight="1080" rtablesize="[10, 10]" useclientjvm="true" format="document" labelwidth="20" postplot="" typesetting="extended" ansi="false" ansicolor="[]" elisiondigitsthreshold="10000" showassumed="1" ansilprint="false" trailingsemicolon="true" errorcursor="false" labelling="true" screenheight="25" prompt="&gt; " verboseproc="1" latexwidth="8.0" ShowLabels="true"/>
<Styles>
<Font name="Heading 1" background="[255,255,255]" bold="true" executable="false" family="Times New Roman" foreground="[0,0,0]" italic="false" opaque="false" readonly="false" size="18" subscript="false" superscript="false" underline="false" placeholder="false"/>
<Font name="Warning" background="[255,255,255]" bold="false" executable="false" family="Courier New" foreground="[0,0,255]" italic="false" opaque="false" readonly="true" size="12" subscript="false" superscript="false" underline="false" placeholder="false"/>
<Font name="2D Output" background="[255,255,255]" bold="false" executable="false" family="Times New Roman" foreground="[0,0,255]" italic="false" opaque="false" readonly="true" size="12" subscript="false" superscript="false" underline="false" placeholder="false"/>
<Font name="Heading 4" background="[255,255,255]" bold="false" executable="false" family="Times New Roman" foreground="[0,0,0]" italic="true" opaque="false" readonly="false" size="12" subscript="false" superscript="false" underline="false" placeholder="false"/>
<Font name="Line Printed Output" background="[255,255,255]" bold="false" executable="false" family="Courier New" foreground="[0,0,255]" italic="false" opaque="false" readonly="true" size="12" subscript="false" superscript="false" underline="false" placeholder="false"/>
<Font name="Heading 2" background="[255,255,255]" bold="true" executable="false" family="Times New Roman" foreground="[0,0,0]" italic="false" opaque="false" readonly="false" size="16" subscript="false" superscript="false" underline="false" placeholder="false"/>
<Font name="Maple Output" background="[255,255,255]" bold="false" executable="false" family="Times New Roman" foreground="[0,0,0]" italic="false" opaque="false" readonly="false" size="12" subscript="false" superscript="false" underline="false" placeholder="false"/>
<Font name="2D Inert Output" background="[255,255,255]" bold="false" executable="true" family="Times New Roman" foreground="[144,144,144]" italic="false" opaque="false" readonly="false" size="12" subscript="false" superscript="false" underline="false" placeholder="false"/>
<Font name="Heading 3" background="[255,255,255]" bold="true" executable="false" family="Times New Roman" foreground="[0,0,0]" italic="true" opaque="false" readonly="false" size="14" subscript="false" superscript="false" underline="false" placeholder="false"/>
<Font name="Diagnostic" background="[255,255,255]" bold="false" executable="false" family="Courier New" foreground="[40,120,40]" italic="false" opaque="false" readonly="true" size="12" subscript="false" superscript="false" underline="false" placeholder="false"/>
<Font name="Ordered List 1" background="[255,255,255]" bold="false" executable="false" family="Times New Roman" foreground="[0,0,0]" italic="false" opaque="false" readonly="false" size="12" subscript="false" superscript="false" underline="false" placeholder="false"/>
<Font name="Maple Input" background="[255,255,255]" bold="true" executable="true" family="Courier New" foreground="[120,0,14]" italic="false" opaque="false" readonly="false" size="12" subscript="false" superscript="false" underline="false" placeholder="false"/>
<Font name="Text Output" background="[255,255,255]" bold="false" executable="false" family="Courier New" foreground="[0,0,255]" italic="false" opaque="false" readonly="true" size="12" subscript="false" superscript="false" underline="false" placeholder="false"/>
<Font name="Ordered List 2" background="[255,255,255]" bold="false" executable="false" family="Times New Roman" foreground="[0,0,0]" italic="false" opaque="false" readonly="false" size="12" subscript="false" superscript="false" underline="false" placeholder="false"/>
<Font name="Ordered List 3" background="[255,255,255]" bold="false" executable="false" family="Times New Roman" foreground="[0,0,0]" italic="false" opaque="false" readonly="false" size="12" subscript="false" superscript="false" underline="false" placeholder="false"/>
<Font name="Ordered List 4" background="[255,255,255]" bold="false" executable="false" family="Times New Roman" foreground="[0,0,0]" italic="false" opaque="false" readonly="false" size="12" subscript="false" superscript="false" underline="false" placeholder="false"/>
<Font name="Ordered List 5" background="[255,255,255]" bold="false" executable="false" family="Times New Roman" foreground="[0,0,0]" italic="false" opaque="false" readonly="false" size="12" subscript="false" superscript="false" underline="false" placeholder="false"/>
<Font name="Annotation Title" background="[255,255,255]" bold="true" executable="false" family="Times New Roman" foreground="[0,0,0]" italic="false" opaque="false" readonly="false" size="18" subscript="false" superscript="false" underline="false" placeholder="false"/>
<Font name="Header and Footer" background="[255,255,255]" bold="false" executable="false" family="Times New Roman" foreground="[0,0,0]" italic="false" opaque="false" readonly="false" size="10" subscript="false" superscript="false" underline="false" placeholder="false"/>
<Font name="HyperlinkError" background="[255,255,255]" bold="false" executable="false" family="Courier New" foreground="[255,0,255]" italic="false" opaque="false" readonly="true" size="12" subscript="false" superscript="false" underline="true" placeholder="false"/>
<Font name="Atomic Variable" background="[255,255,255]" bold="false" executable="false" family="Times New Roman" foreground="[175,0,175]" italic="true" opaque="false" readonly="false" size="12" subscript="false" superscript="false" underline="false" placeholder="false"/>
<Font name="HyperlinkWarning" background="[255,255,255]" bold="false" executable="false" family="Courier New" foreground="[0,0,255]" italic="false" opaque="false" readonly="true" size="12" subscript="false" superscript="false" underline="true" placeholder="false"/>
<Font name="Dictionary Hyperlink" background="[255,255,255]" bold="false" executable="false" family="Times New Roman" foreground="[147,0,15]" italic="false" opaque="false" readonly="false" size="12" subscript="false" superscript="false" underline="true" placeholder="false"/>
<Font name="2D Math" background="[255,255,255]" bold="false" executable="true" family="Times New Roman" foreground="[0,0,0]" italic="false" opaque="false" readonly="false" size="12" subscript="false" superscript="false" underline="false" placeholder="false"/>
<Font name="Bullet Item" background="[255,255,255]" bold="false" executable="false" family="Times New Roman" foreground="[0,0,0]" italic="false" opaque="false" readonly="false" size="12" subscript="false" superscript="false" underline="false" placeholder="false"/>
<Font name="Maple Plot" background="[255,255,255]" bold="false" executable="false" family="Times New Roman" foreground="[0,0,0]" italic="false" opaque="false" readonly="false" size="12" subscript="false" superscript="false" underline="false" placeholder="false"/>
<Font name="Annotation Text" background="[255,255,255]" bold="false" executable="false" family="Times New Roman" foreground="[0,0,0]" italic="false" opaque="false" readonly="false" size="12" subscript="false" superscript="false" underline="false" placeholder="false"/>
<Font name="List Item" background="[255,255,255]" bold="false" executable="false" family="Times New Roman" foreground="[0,0,0]" italic="false" opaque="false" readonly="false" size="12" subscript="false" superscript="false" underline="false" placeholder="false"/>
<Font name="Dash Item" background="[255,255,255]" bold="false" executable="false" family="Times New Roman" foreground="[0,0,0]" italic="false" opaque="false" readonly="false" size="12" subscript="false" superscript="false" underline="false" placeholder="false"/>
<Font name="2D Input" background="[255,255,255]" bold="false" executable="true" family="Times New Roman" foreground="[0,0,0]" italic="false" opaque="false" readonly="false" size="12" subscript="false" superscript="false" underline="false" placeholder="false"/>
<Font name="Error" background="[255,255,255]" bold="false" executable="false" family="Courier New" foreground="[255,0,255]" italic="false" opaque="false" readonly="true" size="12" subscript="false" superscript="false" underline="false" placeholder="false"/>
<Font name="Title" background="[255,255,255]" bold="true" executable="false" family="Times New Roman" foreground="[0,0,0]" italic="false" opaque="false" readonly="false" size="18" subscript="false" superscript="false" underline="false" placeholder="false"/>
<Font name="Text" background="[255,255,255]" bold="false" executable="false" family="Segoe UI Semilight" foreground="[0,0,0]" italic="false" opaque="false" readonly="false" size="12" subscript="false" superscript="false" underline="false" placeholder="false"/>
<Font name="Normal" background="[255,255,255]" bold="false" executable="false" family="Times New Roman" foreground="[0,0,0]" italic="false" opaque="false" readonly="false" size="12" subscript="false" superscript="false" underline="false" placeholder="false"/>
<Font name="Caption Reference" background="[255,255,255]" bold="true" executable="false" family="Times New Roman" foreground="[0,0,0]" italic="false" opaque="false" readonly="false" size="12" subscript="false" superscript="false" underline="false" placeholder="false"/>
<Font name="Code" background="[255,255,255]" bold="false" executable="false" family="Courier New" foreground="[255,0,0]" italic="false" opaque="false" readonly="false" size="12" subscript="false" superscript="false" underline="false" placeholder="false"/>
<Font name="Maple Input Placeholder" background="[255,255,255]" bold="true" executable="true" family="Courier New" foreground="[200,0,200]" italic="false" opaque="false" readonly="false" size="12" subscript="false" superscript="false" underline="false" placeholder="true"/>
<Font name="Equation Label" background="[255,255,255]" bold="true" executable="false" family="Times New Roman" foreground="[0,0,0]" italic="false" opaque="false" readonly="false" size="12" subscript="false" superscript="false" underline="false" placeholder="false"/>
<Font name="Author" background="[255,255,255]" bold="false" executable="false" family="Times New Roman" foreground="[0,0,0]" italic="false" opaque="false" readonly="false" size="12" subscript="false" superscript="false" underline="false" placeholder="false"/>
<Font name="Hyperlink" background="[255,255,255]" bold="false" executable="false" family="Times New Roman" foreground="[0,128,128]" italic="false" opaque="false" readonly="false" size="12" subscript="false" superscript="false" underline="true" placeholder="false"/>
<Font name="Caption Text" background="[255,255,255]" bold="true" executable="false" family="Times New Roman" foreground="[0,0,0]" italic="false" opaque="false" readonly="false" size="12" subscript="false" superscript="false" underline="false" placeholder="false"/>
<Layout name="Heading 1" alignment="left" bullet="none" firstindent="0" leftmargin="0" rightmargin="0" linespacing="0.0" spaceabove="8" spacebelow="4" linebreak="space" pagebreak-before="false" initial="0" bulletsuffix=""/>
<Layout name="Warning" alignment="left" bullet="none" firstindent="0" leftmargin="0" rightmargin="0" linespacing="0.0" spaceabove="0" spacebelow="0" linebreak="space" pagebreak-before="false" initial="0" bulletsuffix=""/>
<Layout name="Heading 4" alignment="left" bullet="none" firstindent="0" leftmargin="0" rightmargin="0" linespacing="0.0" spaceabove="0" spacebelow="0" linebreak="space" pagebreak-before="false" initial="0" bulletsuffix=""/>
<Layout name="Line Printed Output" alignment="left" bullet="none" firstindent="0" leftmargin="0" rightmargin="0" linespacing="0.0" spaceabove="0" spacebelow="0" linebreak="any" pagebreak-before="false" initial="0" bulletsuffix=""/>
<Layout name="Heading 2" alignment="left" bullet="none" firstindent="0" leftmargin="0" rightmargin="0" linespacing="0.0" spaceabove="8" spacebelow="2" linebreak="space" pagebreak-before="false" initial="0" bulletsuffix=""/>
<Layout name="Maple Output" alignment="centred" bullet="none" firstindent="0" leftmargin="0" rightmargin="0" linespacing="0.3" spaceabove="0" spacebelow="0" linebreak="space" pagebreak-before="false" initial="0" bulletsuffix=""/>
<Layout name="Heading 3" alignment="left" bullet="none" firstindent="0" leftmargin="0" rightmargin="0" linespacing="0.0" spaceabove="0" spacebelow="0" linebreak="space" pagebreak-before="false" initial="0" bulletsuffix=""/>
<Layout name="Diagnostic" alignment="left" bullet="none" firstindent="0" leftmargin="0" rightmargin="0" linespacing="0.0" spaceabove="0" spacebelow="0" linebreak="any" pagebreak-before="false" initial="0" bulletsuffix=""/>
<Layout name="Ordered List 1" alignment="left" bullet="numeric" firstindent="0" leftmargin="0" rightmargin="0" linespacing="0.0" spaceabove="3" spacebelow="3" linebreak="space" pagebreak-before="false" initial="-1" bulletsuffix="."/>
<Layout name="Text Output" alignment="left" bullet="none" firstindent="0" leftmargin="0" rightmargin="0" linespacing="0.0" spaceabove="0" spacebelow="0" linebreak="newline" pagebreak-before="false" initial="0" bulletsuffix=""/>
<Layout name="Ordered List 2" alignment="left" bullet="alphabetic" firstindent="0" leftmargin="36" rightmargin="0" linespacing="0.0" spaceabove="3" spacebelow="3" linebreak="space" pagebreak-before="false" initial="-1" bulletsuffix="."/>
<Layout name="Ordered List 3" alignment="left" bullet="roman" firstindent="0" leftmargin="72" rightmargin="0" linespacing="0.0" spaceabove="3" spacebelow="3" linebreak="space" pagebreak-before="false" initial="-1" bulletsuffix="."/>
<Layout name="Ordered List 4" alignment="left" bullet="ALPHABETIC" firstindent="0" leftmargin="108" rightmargin="0" linespacing="0.0" spaceabove="3" spacebelow="3" linebreak="space" pagebreak-before="false" initial="-1" bulletsuffix="."/>
<Layout name="Ordered List 5" alignment="left" bullet="ROMAN" firstindent="0" leftmargin="144" rightmargin="0" linespacing="0.0" spaceabove="3" spacebelow="3" linebreak="space" pagebreak-before="false" initial="-1" bulletsuffix="."/>
<Layout name="Annotation Title" alignment="centred" bullet="none" firstindent="0" leftmargin="0" rightmargin="0" linespacing="0.0" spaceabove="12" spacebelow="12" linebreak="space" pagebreak-before="false" initial="0" bulletsuffix=""/>
<Layout name="HyperlinkError" alignment="left" bullet="none" firstindent="0" leftmargin="0" rightmargin="0" linespacing="0.0" spaceabove="0" spacebelow="0" linebreak="space" pagebreak-before="false" initial="0" bulletsuffix=""/>
<Layout name="HyperlinkWarning" alignment="left" bullet="none" firstindent="0" leftmargin="0" rightmargin="0" linespacing="0.0" spaceabove="0" spacebelow="0" linebreak="space" pagebreak-before="false" initial="0" bulletsuffix=""/>
<Layout name="Bullet Item" alignment="left" bullet="dot" firstindent="0" leftmargin="0" rightmargin="0" linespacing="0.0" spaceabove="3" spacebelow="3" linebreak="space" pagebreak-before="false" initial="0" bulletsuffix=""/>
<Layout name="Maple Plot" alignment="centred" bullet="none" firstindent="0" leftmargin="0" rightmargin="0" linespacing="0.0" spaceabove="0" spacebelow="0" linebreak="space" pagebreak-before="false" initial="0" bulletsuffix=""/>
<Layout name="List Item" alignment="left" bullet="indent" firstindent="0" leftmargin="0" rightmargin="0" linespacing="0.0" spaceabove="3" spacebelow="3" linebreak="space" pagebreak-before="false" initial="0" bulletsuffix=""/>
<Layout name="Dash Item" alignment="left" bullet="dash" firstindent="0" leftmargin="0" rightmargin="0" linespacing="0.0" spaceabove="3" spacebelow="3" linebreak="space" pagebreak-before="false" initial="0" bulletsuffix=""/>
<Layout name="Error" alignment="left" bullet="none" firstindent="0" leftmargin="0" rightmargin="0" linespacing="0.0" spaceabove="0" spacebelow="0" linebreak="space" pagebreak-before="false" initial="0" bulletsuffix=""/>
<Layout name="Title" alignment="centred" bullet="none" firstindent="0" leftmargin="0" rightmargin="0" linespacing="0.0" spaceabove="12" spacebelow="12" linebreak="space" pagebreak-before="false" initial="0" bulletsuffix=""/>
<Layout name="Normal" alignment="left" bullet="none" firstindent="0" leftmargin="0" rightmargin="0" linespacing="0.0" spaceabove="0" spacebelow="0" linebreak="space" pagebreak-before="false" initial="0" bulletsuffix=""/>
<Layout name="Author" alignment="centred" bullet="none" firstindent="0" leftmargin="0" rightmargin="0" linespacing="0.0" spaceabove="8" spacebelow="8" linebreak="space" pagebreak-before="false" initial="0" bulletsuffix=""/>
<Pencil-style name="Pencil 1" pen-color="[0,0,0]" pen-height="1.0" pen-width="1.0" pen-opacity="1.0"/>
<Pencil-style name="Pencil 2" pen-color="[0,0,255]" pen-height="1.0" pen-width="1.0" pen-opacity="1.0"/>
<Pencil-style name="Pencil 3" pen-color="[0,0,0]" pen-height="3.0" pen-width="3.0" pen-opacity="1.0"/>
<Pencil-style name="Pencil 4" pen-color="[0,0,255]" pen-height="3.0" pen-width="3.0" pen-opacity="1.0"/>
<Pencil-style name="Pencil 5" pen-color="[255,0,0]" pen-height="5.0" pen-width="5.0" pen-opacity="1.0"/>
<Highlighter-style name="Highlighter 5" pen-color="[255,255,0]" pen-height="48.0" pen-width="48.0" pen-opacity="0.8"/>
<Highlighter-style name="Highlighter 3" pen-color="[51,255,0]" pen-height="24.0" pen-width="24.0" pen-opacity="0.8"/>
<Highlighter-style name="Highlighter 4" pen-color="[0,255,255]" pen-height="32.0" pen-width="32.0" pen-opacity="0.8"/>
<Highlighter-style name="Highlighter 1" pen-color="[255,153,255]" pen-height="12.0" pen-width="8.0" pen-opacity="0.8"/>
<Highlighter-style name="Highlighter 2" pen-color="[255,204,0]" pen-height="14.0" pen-width="14.0" pen-opacity="0.8"/>
</Styles>
<Startup-Code startupcode=""/>
<Task-table>
    <Task-category name="&lt;default&gt;"/>
</Task-table>
<Task/>
<Group labelreference="L6446" drawlabel="true" applyint="true" applyrational="true" applyexponent="false">
<Input><Text-field prompt="&gt; " style="Maple Input" layout="Normal">restart:with(plots):with(plottools):</Text-field>
</Input>
</Group>
<Group labelreference="L6995" drawlabel="true" applyint="true" applyrational="true" applyexponent="false">
<Input><Text-field style="Text" layout="Normal"><Font size="14" bold="true">
CURVATURE OF BILAYER CANTILEVER
</Font></Text-field>
</Input>
</Group>
<Group labelreference="L6652" drawlabel="true" applyint="true" applyrational="true" applyexponent="false">
<Input><Text-field style="Text" layout="Normal"><Font size="14" bold="true">S. Timoshenko &quot;Analysis of bi-metal thermostats&quot;</Font></Text-field>
</Input>
</Group>
<Group hide-input="false" labelreference="L6653" drawlabel="true" applyint="true" applyrational="true" applyexponent="false">
<Input><Text-field style="Text" layout="Normal">Setup: bi-metal stip with thickness h, uniformly heated by DeltaT
consisting of 2 metals with coefficients of expansion alpha_T, Young's moduli E, thicknesses thk, <Font opaque="true" background="[153,204,0]">modified by additional widths</Font>

here:</Text-field><Text-field style="Text" layout="Normal">Layer 1 is passive (0 % strain), material PLA
Layer 2 is active with variable % temperature strain, material LAYWOOD meta5
</Text-field>
</Input>
</Group>
<Group labelreference="L6" drawlabel="true" applyint="true" applyrational="true" applyexponent="false">
<Input><Text-field style="Text" layout="Normal"><Font bold="true">EQUILIBRIUM: </Font>
of forces in layers: P_1 = P_2 (=P)
of moments in layers: P*h/2 = M_1+M_2
internal forces, no external forces</Text-field>
</Input>
</Group>
<Group hide-input="false" labelreference="L3" drawlabel="true" applyint="true" applyrational="true" applyexponent="false">
<Input><Text-field prompt="&gt; " style="Maple Input" layout="Normal">P_1 := P;
P_2 := P;
EQU1 := M_1 + M_2 = P*h/2;</Text-field>
</Input>
<Output><Text-field style="2D Output" layout="Maple Output"><Equation executable="false" style="2D Output" display="LUklbXJvd0c2Iy9JK21vZHVsZW5hbWVHNiJJLFR5cGVzZXR0aW5nR0koX3N5c2xpYkdGJzYmLUkjbWlHRiQ2JVEkUF8xRicvJSdpdGFsaWNHUSV0cnVlRicvJSxtYXRodmFyaWFudEdRJ2l0YWxpY0YnLUkjbW9HRiQ2LVEpJkFzc2lnbjtGJy9GM1Enbm9ybWFsRicvJSZmZW5jZUdRJmZhbHNlRicvJSpzZXBhcmF0b3JHRj0vJSlzdHJldGNoeUdGPS8lKnN5bW1ldHJpY0dGPS8lKGxhcmdlb3BHRj0vJS5tb3ZhYmxlbGltaXRzR0Y9LyUnYWNjZW50R0Y9LyUnbHNwYWNlR1EsMC4yNzc3Nzc4ZW1GJy8lJ3JzcGFjZUdGTC1GLDYlUSJQRidGL0YyRjk=">LV9JLFR5cGVzZXR0aW5nRzYkJSpwcm90ZWN0ZWRHSShfc3lzbGliRzYiSSxtcHJpbnRzbGFzaEdGKDYkNyM+SSRQXzFHRihJIlBHRig3I0Yu</Equation></Text-field>
</Output>
<Output><Text-field style="2D Output" layout="Maple Output"><Equation executable="false" style="2D Output" display="LUklbXJvd0c2Iy9JK21vZHVsZW5hbWVHNiJJLFR5cGVzZXR0aW5nR0koX3N5c2xpYkdGJzYmLUkjbWlHRiQ2JVEkUF8yRicvJSdpdGFsaWNHUSV0cnVlRicvJSxtYXRodmFyaWFudEdRJ2l0YWxpY0YnLUkjbW9HRiQ2LVEpJkFzc2lnbjtGJy9GM1Enbm9ybWFsRicvJSZmZW5jZUdRJmZhbHNlRicvJSpzZXBhcmF0b3JHRj0vJSlzdHJldGNoeUdGPS8lKnN5bW1ldHJpY0dGPS8lKGxhcmdlb3BHRj0vJS5tb3ZhYmxlbGltaXRzR0Y9LyUnYWNjZW50R0Y9LyUnbHNwYWNlR1EsMC4yNzc3Nzc4ZW1GJy8lJ3JzcGFjZUdGTC1GLDYlUSJQRidGL0YyRjk=">LV9JLFR5cGVzZXR0aW5nRzYkJSpwcm90ZWN0ZWRHSShfc3lzbGliRzYiSSxtcHJpbnRzbGFzaEdGKDYkNyM+SSRQXzJHRihJIlBHRig3I0Yu</Equation></Text-field>
</Output>
<Output><Text-field style="2D Output" layout="Maple Output"><Equation executable="false" style="2D Output" display="LUklbXJvd0c2Iy9JK21vZHVsZW5hbWVHNiJJLFR5cGVzZXR0aW5nR0koX3N5c2xpYkdGJzYoLUkjbWlHRiQ2JVElRVFVMUYnLyUnaXRhbGljR1EldHJ1ZUYnLyUsbWF0aHZhcmlhbnRHUSdpdGFsaWNGJy1JI21vR0YkNi1RKSZBc3NpZ247RicvRjNRJ25vcm1hbEYnLyUmZmVuY2VHUSZmYWxzZUYnLyUqc2VwYXJhdG9yR0Y9LyUpc3RyZXRjaHlHRj0vJSpzeW1tZXRyaWNHRj0vJShsYXJnZW9wR0Y9LyUubW92YWJsZWxpbWl0c0dGPS8lJ2FjY2VudEdGPS8lJ2xzcGFjZUdRLDAuMjc3Nzc3OGVtRicvJSdyc3BhY2VHRkwtRiM2Ji1GLDYlUSRNXzFGJ0YvRjItRjY2LVEnJnBsdXM7RidGOUY7Rj5GQEZCRkRGRkZIL0ZLUSwwLjIyMjIyMjJlbUYnL0ZORlgtRiw2JVEkTV8yRidGL0YyRjktRjY2LVEpJmVxdWFscztGJ0Y5RjtGPkZARkJGREZGRkhGSkZNLUkmbWZyYWNHRiQ2KC1GIzYmLUYsNiVRIlBGJ0YvRjItRjY2LVExJkludmlzaWJsZVRpbWVzO0YnRjlGO0Y+RkBGQkZERkZGSC9GS1EmMC4wZW1GJy9GTkZmby1GLDYlUSJoRidGL0YyRjktSSNtbkdGJDYkUSIyRidGOS8lLmxpbmV0aGlja25lc3NHUSIxRicvJStkZW5vbWFsaWduR1EnY2VudGVyRicvJSludW1hbGlnbkdGZHAvJSliZXZlbGxlZEdGPUY5">LV9JLFR5cGVzZXR0aW5nRzYkJSpwcm90ZWN0ZWRHSShfc3lzbGliRzYiSSxtcHJpbnRzbGFzaEdGKDYkNyM+SSVFUVUxR0YoLywmSSRNXzFHRigiIiJJJE1fMkdGKEYxLCQqJkkiUEdGKEYxSSJoR0YoRjEjRjEiIiM3I0Yu</Equation></Text-field>
</Output>
</Group>
<Group labelreference="L5" drawlabel="true" applyint="true" applyrational="true" applyexponent="false">
<Input><Text-field style="Text" layout="Normal"><Font bold="true">MATERIAL:</Font>
M = EI * kappa = EI * 1/r</Text-field>
</Input>
</Group>
<Group hide-input="false" labelreference="L8" drawlabel="true" applyint="true" applyrational="true" applyexponent="false">
<Input><Text-field prompt="&gt; " style="Maple Input" layout="Normal">MAT1 := M_1 = E_1*I_1/r;
MAT2 := M_2 = E_2*I_2/r;</Text-field>
</Input>
<Output><Text-field style="2D Output" layout="Maple Output"><Equation executable="false" style="2D Output" display="LUklbXJvd0c2Iy9JK21vZHVsZW5hbWVHNiJJLFR5cGVzZXR0aW5nR0koX3N5c2xpYkdGJzYoLUkjbWlHRiQ2JVElTUFUMUYnLyUnaXRhbGljR1EldHJ1ZUYnLyUsbWF0aHZhcmlhbnRHUSdpdGFsaWNGJy1JI21vR0YkNi1RKSZBc3NpZ247RicvRjNRJ25vcm1hbEYnLyUmZmVuY2VHUSZmYWxzZUYnLyUqc2VwYXJhdG9yR0Y9LyUpc3RyZXRjaHlHRj0vJSpzeW1tZXRyaWNHRj0vJShsYXJnZW9wR0Y9LyUubW92YWJsZWxpbWl0c0dGPS8lJ2FjY2VudEdGPS8lJ2xzcGFjZUdRLDAuMjc3Nzc3OGVtRicvJSdyc3BhY2VHRkwtRiw2JVEkTV8xRidGL0YyLUY2Ni1RKSZlcXVhbHM7RidGOUY7Rj5GQEZCRkRGRkZIRkpGTS1JJm1mcmFjR0YkNigtRiM2Ji1GLDYlUSRFXzFGJ0YvRjItRjY2LVExJkludmlzaWJsZVRpbWVzO0YnRjlGO0Y+RkBGQkZERkZGSC9GS1EmMC4wZW1GJy9GTkZbby1GLDYlUSRJXzFGJ0YvRjJGOS1GLDYlUSJyRidGL0YyLyUubGluZXRoaWNrbmVzc0dRIjFGJy8lK2Rlbm9tYWxpZ25HUSdjZW50ZXJGJy8lKW51bWFsaWduR0Zoby8lKWJldmVsbGVkR0Y9Rjk=">LV9JLFR5cGVzZXR0aW5nRzYkJSpwcm90ZWN0ZWRHSShfc3lzbGliRzYiSSxtcHJpbnRzbGFzaEdGKDYkNyM+SSVNQVQxR0YoL0kkTV8xR0YoKihJJEVfMUdGKCIiIkkkSV8xR0YoRjJJInJHRighIiI3I0Yu</Equation></Text-field>
</Output>
<Output><Text-field style="2D Output" layout="Maple Output"><Equation executable="false" style="2D Output" display="LUklbXJvd0c2Iy9JK21vZHVsZW5hbWVHNiJJLFR5cGVzZXR0aW5nR0koX3N5c2xpYkdGJzYoLUkjbWlHRiQ2JVElTUFUMkYnLyUnaXRhbGljR1EldHJ1ZUYnLyUsbWF0aHZhcmlhbnRHUSdpdGFsaWNGJy1JI21vR0YkNi1RKSZBc3NpZ247RicvRjNRJ25vcm1hbEYnLyUmZmVuY2VHUSZmYWxzZUYnLyUqc2VwYXJhdG9yR0Y9LyUpc3RyZXRjaHlHRj0vJSpzeW1tZXRyaWNHRj0vJShsYXJnZW9wR0Y9LyUubW92YWJsZWxpbWl0c0dGPS8lJ2FjY2VudEdGPS8lJ2xzcGFjZUdRLDAuMjc3Nzc3OGVtRicvJSdyc3BhY2VHRkwtRiw2JVEkTV8yRidGL0YyLUY2Ni1RKSZlcXVhbHM7RidGOUY7Rj5GQEZCRkRGRkZIRkpGTS1JJm1mcmFjR0YkNigtRiM2Ji1GLDYlUSRFXzJGJ0YvRjItRjY2LVExJkludmlzaWJsZVRpbWVzO0YnRjlGO0Y+RkBGQkZERkZGSC9GS1EmMC4wZW1GJy9GTkZbby1GLDYlUSRJXzJGJ0YvRjJGOS1GLDYlUSJyRidGL0YyLyUubGluZXRoaWNrbmVzc0dRIjFGJy8lK2Rlbm9tYWxpZ25HUSdjZW50ZXJGJy8lKW51bWFsaWduR0Zoby8lKWJldmVsbGVkR0Y9Rjk=">LV9JLFR5cGVzZXR0aW5nRzYkJSpwcm90ZWN0ZWRHSShfc3lzbGliRzYiSSxtcHJpbnRzbGFzaEdGKDYkNyM+SSVNQVQyR0YoL0kkTV8yR0YoKihJJEVfMkdGKCIiIkkkSV8yR0YoRjJJInJHRighIiI3I0Yu</Equation></Text-field>
</Output>
</Group>
<Group hide-input="false" labelreference="L13" drawlabel="true" applyint="true" applyrational="true" applyexponent="false">
<Input><Text-field style="Text" layout="Normal">Combining EQU and MAT</Text-field><Text-field prompt="&gt; " style="Maple Input" layout="Normal">EQUMAT:=subs({MAT1,MAT2},EQU1);</Text-field>
</Input>
<Output><Text-field style="2D Output" layout="Maple Output"><Equation executable="false" style="2D Output" display="LUklbXJvd0c2Iy9JK21vZHVsZW5hbWVHNiJJLFR5cGVzZXR0aW5nR0koX3N5c2xpYkdGJzYoLUkjbWlHRiQ2JVEnRVFVTUFURicvJSdpdGFsaWNHUSV0cnVlRicvJSxtYXRodmFyaWFudEdRJ2l0YWxpY0YnLUkjbW9HRiQ2LVEpJkFzc2lnbjtGJy9GM1Enbm9ybWFsRicvJSZmZW5jZUdRJmZhbHNlRicvJSpzZXBhcmF0b3JHRj0vJSlzdHJldGNoeUdGPS8lKnN5bW1ldHJpY0dGPS8lKGxhcmdlb3BHRj0vJS5tb3ZhYmxlbGltaXRzR0Y9LyUnYWNjZW50R0Y9LyUnbHNwYWNlR1EsMC4yNzc3Nzc4ZW1GJy8lJ3JzcGFjZUdGTC1GIzYmLUkmbWZyYWNHRiQ2KC1GIzYmLUYsNiVRJEVfMUYnRi9GMi1GNjYtUTEmSW52aXNpYmxlVGltZXM7RidGOUY7Rj5GQEZCRkRGRkZIL0ZLUSYwLjBlbUYnL0ZORmduLUYsNiVRJElfMUYnRi9GMkY5LUYsNiVRInJGJ0YvRjIvJS5saW5ldGhpY2tuZXNzR1EiMUYnLyUrZGVub21hbGlnbkdRJ2NlbnRlckYnLyUpbnVtYWxpZ25HRmRvLyUpYmV2ZWxsZWRHRj0tRjY2LVEnJnBsdXM7RidGOUY7Rj5GQEZCRkRGRkZIL0ZLUSwwLjIyMjIyMjJlbUYnL0ZORl1wLUZSNigtRiM2Ji1GLDYlUSRFXzJGJ0YvRjJGWS1GLDYlUSRJXzJGJ0YvRjJGOUZcb0Zfb0Zib0Zlb0Znb0Y5LUY2Ni1RKSZlcXVhbHM7RidGOUY7Rj5GQEZCRkRGRkZIRkpGTS1GUjYoLUYjNiYtRiw2JVEiUEYnRi9GMkZZLUYsNiVRImhGJ0YvRjJGOS1JI21uR0YkNiRRIjJGJ0Y5Rl9vRmJvRmVvRmdvRjk=">LV9JLFR5cGVzZXR0aW5nRzYkJSpwcm90ZWN0ZWRHSShfc3lzbGliRzYiSSxtcHJpbnRzbGFzaEdGKDYkNyM+SSdFUVVNQVRHRigvLCYqKEkkRV8xR0YoIiIiSSRJXzFHRihGMkkickdGKCEiIkYyKihJJEVfMkdGKEYySSRJXzJHRihGMkY0RjVGMiwkKiZJIlBHRihGMkkiaEdGKEYyI0YyIiIjNyNGLg==</Equation></Text-field>
</Output>
</Group>
<Group labelreference="L9" drawlabel="true" applyint="true" applyrational="true" applyexponent="false">
<Input><Text-field style="Text" layout="Normal"><Font bold="true">KINEMATICS:</Font>
on the bearing surfaces the total elongation/strain of both metals must be equal
2 components of strain: 
thermal strain: eps_T = alpha_T_i * Delta_T
mechanical (&quot;elastic&quot;) strain:
due to forces: eps_F = P / EA
due to curvature: eps_kappa = kappa * thk_i / 2 = thk_i / (2r)</Text-field>
</Input>
</Group>
<Group hide-input="false" labelreference="L11" drawlabel="true" applyint="true" applyrational="true" applyexponent="false">
<Input><Text-field prompt="&gt; " style="Maple Input" layout="Normal">KIN1 := alpha_T_1*Delta_T + P_1 / (E_1*thk_1*<Font opaque="true" background="[153,204,0]">width_1</Font>) + thk_1 / (2*r) = alpha_T_2*Delta_T - P_2 / (E_2*thk_2*<Font opaque="true" background="[153,204,0]">width_2</Font>) - thk_2 / (2*r);</Text-field>
</Input>
<Output><Text-field style="2D Output" layout="Maple Output"><Equation executable="false" style="2D Output" display="LUklbXJvd0c2Iy9JK21vZHVsZW5hbWVHNiJJLFR5cGVzZXR0aW5nR0koX3N5c2xpYkdGJzYoLUkjbWlHRiQ2JVElS0lOMUYnLyUnaXRhbGljR1EldHJ1ZUYnLyUsbWF0aHZhcmlhbnRHUSdpdGFsaWNGJy1JI21vR0YkNi1RKSZBc3NpZ247RicvRjNRJ25vcm1hbEYnLyUmZmVuY2VHUSZmYWxzZUYnLyUqc2VwYXJhdG9yR0Y9LyUpc3RyZXRjaHlHRj0vJSpzeW1tZXRyaWNHRj0vJShsYXJnZW9wR0Y9LyUubW92YWJsZWxpbWl0c0dGPS8lJ2FjY2VudEdGPS8lJ2xzcGFjZUdRLDAuMjc3Nzc3OGVtRicvJSdyc3BhY2VHRkwtRiM2KC1GIzYmLUYsNiVRKmFscGhhX1RfMUYnRi9GMi1GNjYtUTEmSW52aXNpYmxlVGltZXM7RidGOUY7Rj5GQEZCRkRGRkZIL0ZLUSYwLjBlbUYnL0ZORlotRiw2JVEoRGVsdGFfVEYnRi9GMkY5LUY2Ni1RJyZwbHVzO0YnRjlGO0Y+RkBGQkZERkZGSC9GS1EsMC4yMjIyMjIyZW1GJy9GTkZdby1JJm1mcmFjR0YkNigtRiw2JVEiUEYnRi9GMi1GIzYoLUYsNiVRJEVfMUYnRi9GMkZWLUYsNiVRJnRoa18xRidGL0YyRlYtRiw2JVEod2lkdGhfMUYnRi9GMkY5LyUubGluZXRoaWNrbmVzc0dRIjFGJy8lK2Rlbm9tYWxpZ25HUSdjZW50ZXJGJy8lKW51bWFsaWduR0ZlcC8lKWJldmVsbGVkR0Y9RmluLUZgbzYoRmpvLUYjNiYtSSNtbkdGJDYkUSIyRidGOUZWLUYsNiVRInJGJ0YvRjJGOUZgcEZjcEZmcEZocEY5LUY2Ni1RKSZlcXVhbHM7RidGOUY7Rj5GQEZCRkRGRkZIRkpGTS1GIzYoLUYjNiYtRiw2JVEqYWxwaGFfVF8yRidGL0YyRlZGZm5GOS1GNjYtUSgmbWludXM7RidGOUY7Rj5GQEZCRkRGRkZIRlxvRl5vLUZgbzYoRmJvLUYjNigtRiw2JVEkRV8yRidGL0YyRlYtRiw2JVEmdGhrXzJGJ0YvRjJGVi1GLDYlUSh3aWR0aF8yRidGL0YyRjlGYHBGY3BGZnBGaHBGX3ItRmBvNihGaXJGXHFGYHBGY3BGZnBGaHBGOUY5">LV9JLFR5cGVzZXR0aW5nRzYkJSpwcm90ZWN0ZWRHSShfc3lzbGliRzYiSSxtcHJpbnRzbGFzaEdGKDYkNyM+SSVLSU4xR0YoLywoKiZJKmFscGhhX1RfMUdGKCIiIkkoRGVsdGFfVEdGKEYyRjIqKkkiUEdGKEYySSRFXzFHRighIiJJJnRoa18xR0YoRjdJKHdpZHRoXzFHRihGN0YyKiZGOEYySSJyR0YoRjcjRjIiIiMsKComSSphbHBoYV9UXzJHRihGMkYzRjJGMioqRjVGMkkkRV8yR0YoRjdJJnRoa18yR0YoRjdJKHdpZHRoXzJHRihGN0Y3KiZGQ0YyRjtGNyNGN0Y9NyNGLg==</Equation></Text-field>
</Output>
</Group>
<Group hide-input="false" labelreference="L16" drawlabel="true" applyint="true" applyrational="true" applyexponent="false">
<Input><Text-field style="Text" layout="Normal">Combining KIN and (EQU,MAT)</Text-field><Text-field prompt="&gt; " style="Maple Input" layout="Normal">P:=solve(EQUMAT,P);
EQUMATKIN := KIN1;</Text-field>
</Input>
<Output><Text-field style="2D Output" layout="Maple Output"><Equation executable="false" style="2D Output" display="LUklbXJvd0c2Iy9JK21vZHVsZW5hbWVHNiJJLFR5cGVzZXR0aW5nR0koX3N5c2xpYkdGJzYmLUkjbWlHRiQ2JVEiUEYnLyUnaXRhbGljR1EldHJ1ZUYnLyUsbWF0aHZhcmlhbnRHUSdpdGFsaWNGJy1JI21vR0YkNi1RKSZBc3NpZ247RicvRjNRJ25vcm1hbEYnLyUmZmVuY2VHUSZmYWxzZUYnLyUqc2VwYXJhdG9yR0Y9LyUpc3RyZXRjaHlHRj0vJSpzeW1tZXRyaWNHRj0vJShsYXJnZW9wR0Y9LyUubW92YWJsZWxpbWl0c0dGPS8lJ2FjY2VudEdGPS8lJ2xzcGFjZUdRLDAuMjc3Nzc3OGVtRicvJSdyc3BhY2VHRkwtSSZtZnJhY0dGJDYoLUYjNiYtSSNtbkdGJDYkUSIyRidGOS1GNjYtUTEmSW52aXNpYmxlVGltZXM7RidGOUY7Rj5GQEZCRkRGRkZIL0ZLUSYwLjBlbUYnL0ZORmZuLUkobWZlbmNlZEdGJDYkLUYjNiYtRiM2Ji1GLDYlUSRFXzFGJ0YvRjJGWC1GLDYlUSRJXzFGJ0YvRjJGOS1GNjYtUScmcGx1cztGJ0Y5RjtGPkZARkJGREZGRkgvRktRLDAuMjIyMjIyMmVtRicvRk5GaW8tRiM2Ji1GLDYlUSRFXzJGJ0YvRjJGWC1GLDYlUSRJXzJGJ0YvRjJGOUY5RjlGOS1GIzYmLUYsNiVRInJGJ0YvRjJGWC1GLDYlUSJoRidGL0YyRjkvJS5saW5ldGhpY2tuZXNzR1EiMUYnLyUrZGVub21hbGlnbkdRJ2NlbnRlckYnLyUpbnVtYWxpZ25HRmBxLyUpYmV2ZWxsZWRHRj1GOQ==">LV9JLFR5cGVzZXR0aW5nRzYkJSpwcm90ZWN0ZWRHSShfc3lzbGliRzYiSSxtcHJpbnRzbGFzaEdGKDYkNyM+SSJQR0YoLCQqKCwmKiZJJEVfMUdGKCIiIkkkSV8xR0YoRjNGMyomSSRFXzJHRihGM0kkSV8yR0YoRjNGM0YzSSJyR0YoISIiSSJoR0YoRjkiIiM3I0Yu</Equation></Text-field>
</Output>
<Output><Text-field style="2D Output" layout="Maple Output"><Equation executable="false" style="2D Output" display="LUklbXJvd0c2Iy9JK21vZHVsZW5hbWVHNiJJLFR5cGVzZXR0aW5nR0koX3N5c2xpYkdGJzYoLUkjbWlHRiQ2JVEqRVFVTUFUS0lORicvJSdpdGFsaWNHUSV0cnVlRicvJSxtYXRodmFyaWFudEdRJ2l0YWxpY0YnLUkjbW9HRiQ2LVEpJkFzc2lnbjtGJy9GM1Enbm9ybWFsRicvJSZmZW5jZUdRJmZhbHNlRicvJSpzZXBhcmF0b3JHRj0vJSlzdHJldGNoeUdGPS8lKnN5bW1ldHJpY0dGPS8lKGxhcmdlb3BHRj0vJS5tb3ZhYmxlbGltaXRzR0Y9LyUnYWNjZW50R0Y9LyUnbHNwYWNlR1EsMC4yNzc3Nzc4ZW1GJy8lJ3JzcGFjZUdGTC1GIzYoLUYjNiYtRiw2JVEqYWxwaGFfVF8xRidGL0YyLUY2Ni1RMSZJbnZpc2libGVUaW1lcztGJ0Y5RjtGPkZARkJGREZGRkgvRktRJjAuMGVtRicvRk5GWi1GLDYlUShEZWx0YV9URidGL0YyRjktRjY2LVEnJnBsdXM7RidGOUY7Rj5GQEZCRkRGRkZIL0ZLUSwwLjIyMjIyMjJlbUYnL0ZORl1vLUkmbWZyYWNHRiQ2KC1GIzYmLUkjbW5HRiQ2JFEiMkYnRjlGVi1JKG1mZW5jZWRHRiQ2JC1GIzYmLUYjNiYtRiw2JVEkRV8xRidGL0YyRlYtRiw2JVEkSV8xRidGL0YyRjlGaW4tRiM2Ji1GLDYlUSRFXzJGJ0YvRjJGVi1GLDYlUSRJXzJGJ0YvRjJGOUY5RjlGOS1GIzYsLUYsNiVRInJGJ0YvRjJGVi1GLDYlUSJoRidGL0YyRlZGX3BGVi1GLDYlUSZ0aGtfMUYnRi9GMkZWLUYsNiVRKHdpZHRoXzFGJ0YvRjJGOS8lLmxpbmV0aGlja25lc3NHUSIxRicvJStkZW5vbWFsaWduR1EnY2VudGVyRicvJSludW1hbGlnbkdGYHIvJSliZXZlbGxlZEdGPUZpbi1GYG82KEZlcS1GIzYmRmRvRlZGX3FGOUZbckZeckZhckZjckY5LUY2Ni1RKSZlcXVhbHM7RidGOUY7Rj5GQEZCRkRGRkZIRkpGTS1GIzYoLUYjNiYtRiw2JVEqYWxwaGFfVF8yRidGL0YyRlZGZm5GOS1GNjYtUSgmbWludXM7RidGOUY7Rj5GQEZCRkRGRkZIRlxvRl5vLUZgbzYoRmJvLUYjNixGX3FGVkZicUZWRmdwRlYtRiw2JVEmdGhrXzJGJ0YvRjJGVi1GLDYlUSh3aWR0aF8yRidGL0YyRjlGW3JGXnJGYXJGY3JGY3MtRmBvNihGanNGZ3JGW3JGXnJGYXJGY3JGOUY5">LV9JLFR5cGVzZXR0aW5nRzYkJSpwcm90ZWN0ZWRHSShfc3lzbGliRzYiSSxtcHJpbnRzbGFzaEdGKDYkNyM+SSpFUVVNQVRLSU5HRigvLCgqJkkqYWxwaGFfVF8xR0YoIiIiSShEZWx0YV9UR0YoRjJGMiouLCYqJkkkRV8xR0YoRjJJJElfMUdGKEYyRjIqJkkkRV8yR0YoRjJJJElfMkdGKEYyRjJGMkkickdGKCEiIkkiaEdGKEY9RjdGPUkmdGhrXzFHRihGPUkod2lkdGhfMUdGKEY9IiIjKiZGP0YyRjxGPSNGMkZBLCgqJkkqYWxwaGFfVF8yR0YoRjJGM0YyRjIqLkY1RjJGPEY9Rj5GPUY6Rj1JJnRoa18yR0YoRj1JKHdpZHRoXzJHRihGPSEiIyomRkhGMkY8Rj0jRj1GQTcjRi4=</Equation></Text-field>
</Output>
</Group>
<Group hide-input="false" labelreference="L18" drawlabel="true" applyint="true" applyrational="true" applyexponent="false">
<Input><Text-field style="Text" layout="Normal">Second moment of inertia</Text-field><Text-field prompt="&gt; " style="Maple Input" layout="Normal">I_1:=<Font opaque="true" background="[153,204,0]">width_1</Font>*thk_1^3/12;
I_2:=<Font opaque="true" background="[153,204,0]">width_2</Font>*thk_2^3/12;</Text-field>
</Input>
<Output><Text-field style="2D Output" layout="Maple Output"><Equation executable="false" style="2D Output" display="LUklbXJvd0c2Iy9JK21vZHVsZW5hbWVHNiJJLFR5cGVzZXR0aW5nR0koX3N5c2xpYkdGJzYmLUkjbWlHRiQ2JVEkSV8xRicvJSdpdGFsaWNHUSV0cnVlRicvJSxtYXRodmFyaWFudEdRJ2l0YWxpY0YnLUkjbW9HRiQ2LVEpJkFzc2lnbjtGJy9GM1Enbm9ybWFsRicvJSZmZW5jZUdRJmZhbHNlRicvJSpzZXBhcmF0b3JHRj0vJSlzdHJldGNoeUdGPS8lKnN5bW1ldHJpY0dGPS8lKGxhcmdlb3BHRj0vJS5tb3ZhYmxlbGltaXRzR0Y9LyUnYWNjZW50R0Y9LyUnbHNwYWNlR1EsMC4yNzc3Nzc4ZW1GJy8lJ3JzcGFjZUdGTC1JJm1mcmFjR0YkNigtRiM2Ji1GLDYlUSh3aWR0aF8xRidGL0YyLUY2Ni1RMSZJbnZpc2libGVUaW1lcztGJ0Y5RjtGPkZARkJGREZGRkgvRktRJjAuMGVtRicvRk5GZW4tSSVtc3VwR0YkNiUtRiw2JVEmdGhrXzFGJ0YvRjItSSNtbkdGJDYkUSIzRidGOS8lMXN1cGVyc2NyaXB0c2hpZnRHUSIwRidGOS1GXm82JFEjMTJGJ0Y5LyUubGluZXRoaWNrbmVzc0dRIjFGJy8lK2Rlbm9tYWxpZ25HUSdjZW50ZXJGJy8lKW51bWFsaWduR0ZccC8lKWJldmVsbGVkR0Y9Rjk=">LV9JLFR5cGVzZXR0aW5nRzYkJSpwcm90ZWN0ZWRHSShfc3lzbGliRzYiSSxtcHJpbnRzbGFzaEdGKDYkNyM+SSRJXzFHRigsJComSSh3aWR0aF8xR0YoIiIiSSZ0aGtfMUdGKCIiJCNGMSIjNzcjRi4=</Equation></Text-field>
</Output>
<Output><Text-field style="2D Output" layout="Maple Output"><Equation executable="false" style="2D Output" display="LUklbXJvd0c2Iy9JK21vZHVsZW5hbWVHNiJJLFR5cGVzZXR0aW5nR0koX3N5c2xpYkdGJzYmLUkjbWlHRiQ2JVEkSV8yRicvJSdpdGFsaWNHUSV0cnVlRicvJSxtYXRodmFyaWFudEdRJ2l0YWxpY0YnLUkjbW9HRiQ2LVEpJkFzc2lnbjtGJy9GM1Enbm9ybWFsRicvJSZmZW5jZUdRJmZhbHNlRicvJSpzZXBhcmF0b3JHRj0vJSlzdHJldGNoeUdGPS8lKnN5bW1ldHJpY0dGPS8lKGxhcmdlb3BHRj0vJS5tb3ZhYmxlbGltaXRzR0Y9LyUnYWNjZW50R0Y9LyUnbHNwYWNlR1EsMC4yNzc3Nzc4ZW1GJy8lJ3JzcGFjZUdGTC1JJm1mcmFjR0YkNigtRiM2Ji1GLDYlUSh3aWR0aF8yRidGL0YyLUY2Ni1RMSZJbnZpc2libGVUaW1lcztGJ0Y5RjtGPkZARkJGREZGRkgvRktRJjAuMGVtRicvRk5GZW4tSSVtc3VwR0YkNiUtRiw2JVEmdGhrXzJGJ0YvRjItSSNtbkdGJDYkUSIzRidGOS8lMXN1cGVyc2NyaXB0c2hpZnRHUSIwRidGOS1GXm82JFEjMTJGJ0Y5LyUubGluZXRoaWNrbmVzc0dRIjFGJy8lK2Rlbm9tYWxpZ25HUSdjZW50ZXJGJy8lKW51bWFsaWduR0ZccC8lKWJldmVsbGVkR0Y9Rjk=">LV9JLFR5cGVzZXR0aW5nRzYkJSpwcm90ZWN0ZWRHSShfc3lzbGliRzYiSSxtcHJpbnRzbGFzaEdGKDYkNyM+SSRJXzJHRigsJComSSh3aWR0aF8yR0YoIiIiSSZ0aGtfMkdGKCIiJCNGMSIjNzcjRi4=</Equation></Text-field>
</Output>
</Group>
<Group hide-input="false" labelreference="L19" drawlabel="true" applyint="true" applyrational="true" applyexponent="false">
<Input><Text-field style="Text" layout="Normal">Resulting equation for curvature radius r</Text-field><Text-field prompt="&gt; " style="Maple Input" layout="Normal">r:=simplify(solve(EQUMATKIN,r));</Text-field>
</Input>
<Output><Text-field style="2D Output" layout="Maple Output"><Equation executable="false" style="2D Output" display="LUklbXJvd0c2Iy9JK21vZHVsZW5hbWVHNiJJLFR5cGVzZXR0aW5nR0koX3N5c2xpYkdGJzYmLUkjbWlHRiQ2JVEickYnLyUnaXRhbGljR1EldHJ1ZUYnLyUsbWF0aHZhcmlhbnRHUSdpdGFsaWNGJy1JI21vR0YkNi1RKSZBc3NpZ247RicvRjNRJ25vcm1hbEYnLyUmZmVuY2VHUSZmYWxzZUYnLyUqc2VwYXJhdG9yR0Y9LyUpc3RyZXRjaHlHRj0vJSpzeW1tZXRyaWNHRj0vJShsYXJnZW9wR0Y9LyUubW92YWJsZWxpbWl0c0dGPS8lJ2FjY2VudEdGPS8lJ2xzcGFjZUdRLDAuMjc3Nzc3OGVtRicvJSdyc3BhY2VHRkwtSSZtZnJhY0dGJDYoLUYjNigtRiM2KC1JJW1zdXBHRiQ2JS1GLDYlUSRFXzFGJ0YvRjItSSNtbkdGJDYkUSIyRidGOS8lMXN1cGVyc2NyaXB0c2hpZnRHUSIwRictRjY2LVExJkludmlzaWJsZVRpbWVzO0YnRjlGO0Y+RkBGQkZERkZGSC9GS1EmMC4wZW1GJy9GTkZhby1GVzYlLUYsNiVRJnRoa18xRidGL0YyLUZnbjYkUSI0RidGOUZqbkZdby1GVzYlLUYsNiVRKHdpZHRoXzFGJ0YvRjJGZm5Gam5GOS1GNjYtUScmcGx1cztGJ0Y5RjtGPkZARkJGREZGRkgvRktRLDAuMjIyMjIyMmVtRicvRk5GZHAtRiM2Mi1GZ242JFEiM0YnRjlGXW9GWUZdby1GLDYlUSRFXzJGJ0YvRjJGXW9GZW9GXW8tRiw2JVEmdGhrXzJGJ0YvRjJGXW8tRiw2JVEod2lkdGhfMkYnRi9GMkZdby1JKG1mZW5jZWRHRiQ2JC1GIzYoLUZQNigtRlc2JUZlb0ZmbkZqbkZocC8lLmxpbmV0aGlja25lc3NHUSIxRicvJStkZW5vbWFsaWduR1EnY2VudGVyRicvJSludW1hbGlnbkdGYnIvJSliZXZlbGxlZEdGPUZgcC1GIzYmLUYsNiVRImhGJ0YvRjJGXW9GZW9GOUZgcC1GIzYmRl5xRl1vLUZlcTYkLUYjNiZGaXJGYHAtRlA2KEZecUZocEZdckZgckZjckZlckY5RjlGOUY5RjlGXW9GXXBGOUZgcC1GIzYoLUZXNiVGW3FGZm5Gam5GXW8tRlc2JUZecUZob0ZqbkZdby1GVzYlRmFxRmZuRmpuRjlGOS1GIzY2LUZnbjYkUSI2RidGOUZdby1GLDYlUShEZWx0YV9URidGL0YyRl1vRllGXW9GW3FGXW9GaXJGXW9GZW9GXW9GXnFGXW9GXXBGXW9GYXFGXW8tRmVxNiQtRiM2Jy1GNjYtUSomdW1pbnVzMDtGJ0Y5RjtGPkZARkJGREZGRkhGY3BGZXAtRiw2JVEqYWxwaGFfVF8xRidGL0YyRmBwLUYsNiVRKmFscGhhX1RfMkYnRi9GMkY5RjlGOUZdckZgckZjckZlckY5">LV9JLFR5cGVzZXR0aW5nRzYkJSpwcm90ZWN0ZWRHSShfc3lzbGliRzYiSSxtcHJpbnRzbGFzaEdGKDYkNyM+SSJyR0YoLCQqNiwoKihJJEVfMUdGKCIiI0kmdGhrXzFHRigiIiVJKHdpZHRoXzFHRihGMyIiIiowRjJGN0kkRV8yR0YoRjdGNEY3SSZ0aGtfMkdGKEY3SSh3aWR0aF8yR0YoRjcsKCokRjRGMyNGNyIiJComSSJoR0YoRjdGNEY3RjcqJkY6RjcsJkZBRjdGOkY+RjdGN0Y3RjZGN0Y/KihGOUYzRjpGNUY7RjNGN0Y3SShEZWx0YV9UR0YoISIiRjJGRkY5RkZGQUZGRjRGRkY6RkZGNkZGRjtGRiwmSSphbHBoYV9UXzFHRihGRkkqYWxwaGFfVF8yR0YoRjdGRiNGNyIiJzcjRi4=</Equation></Text-field>
</Output>
</Group>
<Group hide-input="false" labelreference="L6089" drawlabel="true" applyint="true" applyrational="true" applyexponent="false">
<Input><Text-field style="Text" layout="Normal">Ratio of Young's moduli n=E_1/E_2</Text-field><Text-field prompt="&gt; " style="Maple Input" layout="Normal">E_1:=n*E_2;
r:=simplify(eval(r)):</Text-field>
</Input>
<Output><Text-field style="2D Output" layout="Maple Output"><Equation executable="false" style="2D Output" display="LUklbXJvd0c2Iy9JK21vZHVsZW5hbWVHNiJJLFR5cGVzZXR0aW5nR0koX3N5c2xpYkdGJzYoLUkjbWlHRiQ2JVEkRV8xRicvJSdpdGFsaWNHUSV0cnVlRicvJSxtYXRodmFyaWFudEdRJ2l0YWxpY0YnLUkjbW9HRiQ2LVEpJkFzc2lnbjtGJy9GM1Enbm9ybWFsRicvJSZmZW5jZUdRJmZhbHNlRicvJSpzZXBhcmF0b3JHRj0vJSlzdHJldGNoeUdGPS8lKnN5bW1ldHJpY0dGPS8lKGxhcmdlb3BHRj0vJS5tb3ZhYmxlbGltaXRzR0Y9LyUnYWNjZW50R0Y9LyUnbHNwYWNlR1EsMC4yNzc3Nzc4ZW1GJy8lJ3JzcGFjZUdGTC1GLDYlUSJuRidGL0YyLUY2Ni1RMSZJbnZpc2libGVUaW1lcztGJ0Y5RjtGPkZARkJGREZGRkgvRktRJjAuMGVtRicvRk5GVi1GLDYlUSRFXzJGJ0YvRjJGOQ==">LV9JLFR5cGVzZXR0aW5nRzYkJSpwcm90ZWN0ZWRHSShfc3lzbGliRzYiSSxtcHJpbnRzbGFzaEdGKDYkNyM+SSRFXzFHRigqJkkibkdGKCIiIkkkRV8yR0YoRjA3I0Yu</Equation></Text-field>
</Output>
</Group>
<Group labelreference="L6678" drawlabel="true" applyint="true" applyrational="true" applyexponent="false">
<Input><Text-field style="Text" bold="true" foreground="[255,0,0]" layout="Normal"><Font bold="false" foreground="[0,0,0]">Ratio of thicknesses m=thk_1/thk_2 and total height h=thk_1+thk_2</Font></Text-field>
</Input>
</Group>
<Group hide-input="false" labelreference="L6679" drawlabel="true" applyint="true" applyrational="true" applyexponent="false">
<Input><Text-field prompt="&gt; " style="Maple Input" layout="Normal">thk_1:=m*h/(1+m);
thk_2:=  h/(1+m);</Text-field>
</Input>
<Output><Text-field style="2D Output" layout="Maple Output"><Equation executable="false" style="2D Output" display="LUklbXJvd0c2Iy9JK21vZHVsZW5hbWVHNiJJLFR5cGVzZXR0aW5nR0koX3N5c2xpYkdGJzYmLUkjbWlHRiQ2JVEmdGhrXzFGJy8lJ2l0YWxpY0dRJXRydWVGJy8lLG1hdGh2YXJpYW50R1EnaXRhbGljRictSSNtb0dGJDYtUSkmQXNzaWduO0YnL0YzUSdub3JtYWxGJy8lJmZlbmNlR1EmZmFsc2VGJy8lKnNlcGFyYXRvckdGPS8lKXN0cmV0Y2h5R0Y9LyUqc3ltbWV0cmljR0Y9LyUobGFyZ2VvcEdGPS8lLm1vdmFibGVsaW1pdHNHRj0vJSdhY2NlbnRHRj0vJSdsc3BhY2VHUSwwLjI3Nzc3NzhlbUYnLyUncnNwYWNlR0ZMLUkmbWZyYWNHRiQ2KC1GIzYmLUYsNiVRIm1GJ0YvRjItRjY2LVExJkludmlzaWJsZVRpbWVzO0YnRjlGO0Y+RkBGQkZERkZGSC9GS1EmMC4wZW1GJy9GTkZlbi1GLDYlUSJoRidGL0YyRjktRiM2Ji1JI21uR0YkNiRRIjFGJ0Y5LUY2Ni1RJyZwbHVzO0YnRjlGO0Y+RkBGQkZERkZGSC9GS1EsMC4yMjIyMjIyZW1GJy9GTkZkb0ZURjkvJS5saW5ldGhpY2tuZXNzR0Zfby8lK2Rlbm9tYWxpZ25HUSdjZW50ZXJGJy8lKW51bWFsaWduR0Zqby8lKWJldmVsbGVkR0Y9Rjk=">LV9JLFR5cGVzZXR0aW5nRzYkJSpwcm90ZWN0ZWRHSShfc3lzbGliRzYiSSxtcHJpbnRzbGFzaEdGKDYkNyM+SSZ0aGtfMUdGKCooSSJtR0YoIiIiSSJoR0YoRjAsJkYwRjBGL0YwISIiNyNGLg==</Equation></Text-field>
</Output>
<Output><Text-field style="2D Output" layout="Maple Output"><Equation executable="false" style="2D Output" display="LUklbXJvd0c2Iy9JK21vZHVsZW5hbWVHNiJJLFR5cGVzZXR0aW5nR0koX3N5c2xpYkdGJzYmLUkjbWlHRiQ2JVEmdGhrXzJGJy8lJ2l0YWxpY0dRJXRydWVGJy8lLG1hdGh2YXJpYW50R1EnaXRhbGljRictSSNtb0dGJDYtUSkmQXNzaWduO0YnL0YzUSdub3JtYWxGJy8lJmZlbmNlR1EmZmFsc2VGJy8lKnNlcGFyYXRvckdGPS8lKXN0cmV0Y2h5R0Y9LyUqc3ltbWV0cmljR0Y9LyUobGFyZ2VvcEdGPS8lLm1vdmFibGVsaW1pdHNHRj0vJSdhY2NlbnRHRj0vJSdsc3BhY2VHUSwwLjI3Nzc3NzhlbUYnLyUncnNwYWNlR0ZMLUkmbWZyYWNHRiQ2KC1GLDYlUSJoRidGL0YyLUYjNiYtSSNtbkdGJDYkUSIxRidGOS1GNjYtUScmcGx1cztGJ0Y5RjtGPkZARkJGREZGRkgvRktRLDAuMjIyMjIyMmVtRicvRk5GaW4tRiw2JVEibUYnRi9GMkY5LyUubGluZXRoaWNrbmVzc0dGWi8lK2Rlbm9tYWxpZ25HUSdjZW50ZXJGJy8lKW51bWFsaWduR0Ziby8lKWJldmVsbGVkR0Y9Rjk=">LV9JLFR5cGVzZXR0aW5nRzYkJSpwcm90ZWN0ZWRHSShfc3lzbGliRzYiSSxtcHJpbnRzbGFzaEdGKDYkNyM+SSZ0aGtfMkdGKComSSJoR0YoIiIiLCZGMEYwSSJtR0YoRjAhIiI3I0Yu</Equation></Text-field>
</Output>
</Group>
<Group labelreference="L6675" drawlabel="true" applyint="true" applyrational="true" applyexponent="false">
<Input><Text-field style="Text" layout="Normal">Ratio of widths q=width_1/width_2</Text-field>
</Input>
</Group>
<Group hide-input="false" labelreference="L6680" drawlabel="true" applyint="true" applyrational="true" applyexponent="false">
<Input><Text-field prompt="&gt; " style="Maple Input" layout="Normal">width_1:=q*width_2;</Text-field>
</Input>
<Output><Text-field style="2D Output" layout="Maple Output"><Equation executable="false" style="2D Output" display="LUklbXJvd0c2Iy9JK21vZHVsZW5hbWVHNiJJLFR5cGVzZXR0aW5nR0koX3N5c2xpYkdGJzYoLUkjbWlHRiQ2JVEod2lkdGhfMUYnLyUnaXRhbGljR1EldHJ1ZUYnLyUsbWF0aHZhcmlhbnRHUSdpdGFsaWNGJy1JI21vR0YkNi1RKSZBc3NpZ247RicvRjNRJ25vcm1hbEYnLyUmZmVuY2VHUSZmYWxzZUYnLyUqc2VwYXJhdG9yR0Y9LyUpc3RyZXRjaHlHRj0vJSpzeW1tZXRyaWNHRj0vJShsYXJnZW9wR0Y9LyUubW92YWJsZWxpbWl0c0dGPS8lJ2FjY2VudEdGPS8lJ2xzcGFjZUdRLDAuMjc3Nzc3OGVtRicvJSdyc3BhY2VHRkwtRiw2JVEicUYnRi9GMi1GNjYtUTEmSW52aXNpYmxlVGltZXM7RidGOUY7Rj5GQEZCRkRGRkZIL0ZLUSYwLjBlbUYnL0ZORlYtRiw2JVEod2lkdGhfMkYnRi9GMkY5">LV9JLFR5cGVzZXR0aW5nRzYkJSpwcm90ZWN0ZWRHSShfc3lzbGliRzYiSSxtcHJpbnRzbGFzaEdGKDYkNyM+SSh3aWR0aF8xR0YoKiZJInFHRigiIiJJKHdpZHRoXzJHRihGMDcjRi4=</Equation></Text-field>
</Output>
</Group>
<Group hide-input="false" labelreference="L6676" drawlabel="true" applyint="true" applyrational="true" applyexponent="false">
<Input><Text-field style="Text" layout="Normal"><Font bold="true">Resulting curvature:</Font></Text-field><Text-field prompt="&gt; " style="Maple Input" layout="Normal">curv:=simplify(1/r);</Text-field>
</Input>
<Output><Text-field style="2D Output" layout="Maple Output"><Equation executable="false" style="2D Output" display="LUklbXJvd0c2Iy9JK21vZHVsZW5hbWVHNiJJLFR5cGVzZXR0aW5nR0koX3N5c2xpYkdGJzYnLUkjbWlHRiQ2JVElY3VydkYnLyUnaXRhbGljR1EldHJ1ZUYnLyUsbWF0aHZhcmlhbnRHUSdpdGFsaWNGJy1JI21vR0YkNi1RKSZBc3NpZ247RicvRjNRJ25vcm1hbEYnLyUmZmVuY2VHUSZmYWxzZUYnLyUqc2VwYXJhdG9yR0Y9LyUpc3RyZXRjaHlHRj0vJSpzeW1tZXRyaWNHRj0vJShsYXJnZW9wR0Y9LyUubW92YWJsZWxpbWl0c0dGPS8lJ2FjY2VudEdGPS8lJ2xzcGFjZUdRLDAuMjc3Nzc3OGVtRicvJSdyc3BhY2VHRkwtRjY2LVEqJnVtaW51czA7RidGOUY7Rj5GQEZCRkRGRkZIL0ZLUSwwLjIyMjIyMjJlbUYnL0ZORlMtSSZtZnJhY0dGJDYoLUYjNjAtSSNtbkdGJDYkUSI2RidGOS1GNjYtUTEmSW52aXNpYmxlVGltZXM7RidGOUY7Rj5GQEZCRkRGRkZIL0ZLUSYwLjBlbUYnL0ZORlxvLUkobWZlbmNlZEdGJDYkLUYjNiYtRiw2JVEqYWxwaGFfVF8xRidGL0YyLUY2Ni1RKCZtaW51cztGJ0Y5RjtGPkZARkJGREZGRkhGUkZULUYsNiVRKmFscGhhX1RfMkYnRi9GMkY5RjlGaG4tRiw2JVEicUYnRi9GMkZobi1GLDYlUSJtRidGL0YyRmhuLUYsNiVRIm5GJ0YvRjJGaG4tRiw2JVEoRGVsdGFfVEYnRi9GMkZobi1JJW1zdXBHRiQ2JS1GX282JC1GIzYmLUZlbjYkUSIxRidGOS1GNjYtUScmcGx1cztGJ0Y5RjtGPkZARkJGREZGRkhGUkZURl9wRjlGOS1GZW42JFEiMkYnRjkvJTFzdXBlcnNjcmlwdHNoaWZ0R1EiMEYnRjktRiM2Ji1GLDYlUSJoRidGL0YyRmhuLUZfbzYkLUYjNiwtRiM2KC1GaXA2JUZicEZlcUZocUZobi1GaXA2JUZfcC1GZW42JFEiNEYnRjlGaHFGaG4tRmlwNiVGXHBGZXFGaHFGOUZicS1GIzYqRmpyRmhuLUZpcDYlRl9wLUZlbjYkUSIzRidGOUZocUZobkZicEZobkZccEY5RmJxLUYjNipGWkZobi1GaXA2JUZfcEZlcUZocUZobkZicEZobkZccEY5RmJxLUYjNipGanJGaG5GYnBGaG5GX3BGaG5GXHBGOUZicUZfcUY5RjlGOS8lLmxpbmV0aGlja25lc3NHRmFxLyUrZGVub21hbGlnbkdRJ2NlbnRlckYnLyUpbnVtYWxpZ25HRmB0LyUpYmV2ZWxsZWRHRj1GOQ==">LV9JLFR5cGVzZXR0aW5nRzYkJSpwcm90ZWN0ZWRHSShfc3lzbGliRzYiSSxtcHJpbnRzbGFzaEdGKDYkNyM+SSVjdXJ2R0YoLCQqMiwmSSphbHBoYV9UXzFHRigiIiJJKmFscGhhX1RfMkdGKCEiIkYySSJxR0YoRjJJIm1HRihGMkkiaEdGKEY0SSJuR0YoRjJJKERlbHRhX1RHRihGMiwmRjJGMkY2RjIiIiMsLCooRjYiIiVGOEY7RjVGO0YyKihGNiIiJEY4RjJGNUYyRj4qKEY2RjtGOEYyRjVGMiIiJyooRjZGMkY4RjJGNUYyRj5GMkYyRjQhIic3I0Yu</Equation></Text-field>
</Output>
</Group>
<Group hide-input="false" labelreference="L6705" drawlabel="true" applyint="true" applyrational="true" applyexponent="false">
<Input><Text-field style="Text" layout="Normal">Timoshenko's original formula (without variable widths)</Text-field><Text-field prompt="&gt; " style="Maple Input" layout="Normal">curvTimo:=6*(alpha_T_2-alpha_T_1)*Delta_T*(1+m)^2/(h*(3*(1+m)^2+(1+m*n)*(m^2+1/(m*n))));</Text-field>
</Input>
<Output><Text-field style="2D Output" layout="Maple Output"><Equation executable="false" style="2D Output" display="LUklbXJvd0c2Iy9JK21vZHVsZW5hbWVHNiJJLFR5cGVzZXR0aW5nR0koX3N5c2xpYkdGJzYmLUkjbWlHRiQ2JVEpY3VydlRpbW9GJy8lJ2l0YWxpY0dRJXRydWVGJy8lLG1hdGh2YXJpYW50R1EnaXRhbGljRictSSNtb0dGJDYtUSkmQXNzaWduO0YnL0YzUSdub3JtYWxGJy8lJmZlbmNlR1EmZmFsc2VGJy8lKnNlcGFyYXRvckdGPS8lKXN0cmV0Y2h5R0Y9LyUqc3ltbWV0cmljR0Y9LyUobGFyZ2VvcEdGPS8lLm1vdmFibGVsaW1pdHNHRj0vJSdhY2NlbnRHRj0vJSdsc3BhY2VHUSwwLjI3Nzc3NzhlbUYnLyUncnNwYWNlR0ZMLUkmbWZyYWNHRiQ2KC1GIzYqLUkjbW5HRiQ2JFEiNkYnRjktRjY2LVExJkludmlzaWJsZVRpbWVzO0YnRjlGO0Y+RkBGQkZERkZGSC9GS1EmMC4wZW1GJy9GTkZmbi1JKG1mZW5jZWRHRiQ2JC1GIzYnLUY2Ni1RKiZ1bWludXMwO0YnRjlGO0Y+RkBGQkZERkZGSC9GS1EsMC4yMjIyMjIyZW1GJy9GTkZhby1GLDYlUSphbHBoYV9UXzFGJ0YvRjItRjY2LVEnJnBsdXM7RidGOUY7Rj5GQEZCRkRGRkZIRmBvRmJvLUYsNiVRKmFscGhhX1RfMkYnRi9GMkY5RjlGWC1GLDYlUShEZWx0YV9URidGL0YyRlgtSSVtc3VwR0YkNiUtRmluNiQtRiM2Ji1GVTYkUSIxRidGOUZmby1GLDYlUSJtRidGL0YyRjlGOS1GVTYkUSIyRidGOS8lMXN1cGVyc2NyaXB0c2hpZnRHUSIwRidGOS1GIzYmLUYsNiVRImhGJ0YvRjJGWC1GaW42JC1GIzYmLUYjNiYtRlU2JFEiM0YnRjlGWEZfcEY5RmZvLUYjNiYtRmluNiQtRiM2Ji1GIzYmRmlwRlgtRiw2JVEibkYnRi9GMkY5RmZvRmZwRjlGOUZYLUZpbjYkLUYjNiYtRmBwNiVGaXBGXHFGX3FGZm8tRlA2KEZmcEZmci8lLmxpbmV0aGlja25lc3NHRmhwLyUrZGVub21hbGlnbkdRJ2NlbnRlckYnLyUpbnVtYWxpZ25HRmdzLyUpYmV2ZWxsZWRHRj1GOUY5RjlGOUY5RjlGY3NGZXNGaHNGanNGOQ==">LV9JLFR5cGVzZXR0aW5nRzYkJSpwcm90ZWN0ZWRHSShfc3lzbGliRzYiSSxtcHJpbnRzbGFzaEdGKDYkNyM+SSljdXJ2VGltb0dGKCwkKiwsJkkqYWxwaGFfVF8xR0YoISIiSSphbHBoYV9UXzJHRigiIiJGNEkoRGVsdGFfVEdGKEY0LCZGNEY0SSJtR0YoRjQiIiNJImhHRihGMiwmKiRGNkY4IiIkKiYsJiomRjdGNEkibkdGKEY0RjRGNEY0RjQsJiokRjdGOEY0KiZGN0YyRkBGMkY0RjRGNEYyIiInNyNGLg==</Equation></Text-field>
</Output>
</Group>
<Group labelreference="L6993" drawlabel="true" applyint="true" applyrational="true" applyexponent="false">
<Input><Text-field style="Text" layout="Normal"><Font size="14" bold="true">
DEFLECTION OF BILAYER CANTILEVER (BERNOULLI, COMPOSITE BEAMS)
</Font></Text-field>
</Input>
</Group>
<Group hide-input="false" labelreference="L6994" drawlabel="true" applyint="true" applyrational="true" applyexponent="false">
<Input><Text-field style="Text" layout="Normal">Cross sectional values of both layers</Text-field><Text-field prompt="&gt; " style="Maple Input" layout="Normal">A_1:=width_1*thk_1;
A_2:=width_2*thk_2;
I_1:=width_1*thk_1^3/12;
I_2:=width_2*thk_2^3/12;</Text-field>
</Input>
<Output><Text-field style="2D Output" layout="Maple Output"><Equation executable="false" style="2D Output" display="LUklbXJvd0c2Iy9JK21vZHVsZW5hbWVHNiJJLFR5cGVzZXR0aW5nR0koX3N5c2xpYkdGJzYmLUkjbWlHRiQ2JVEkQV8xRicvJSdpdGFsaWNHUSV0cnVlRicvJSxtYXRodmFyaWFudEdRJ2l0YWxpY0YnLUkjbW9HRiQ2LVEpJkFzc2lnbjtGJy9GM1Enbm9ybWFsRicvJSZmZW5jZUdRJmZhbHNlRicvJSpzZXBhcmF0b3JHRj0vJSlzdHJldGNoeUdGPS8lKnN5bW1ldHJpY0dGPS8lKGxhcmdlb3BHRj0vJS5tb3ZhYmxlbGltaXRzR0Y9LyUnYWNjZW50R0Y9LyUnbHNwYWNlR1EsMC4yNzc3Nzc4ZW1GJy8lJ3JzcGFjZUdGTC1JJm1mcmFjR0YkNigtRiM2Ki1GLDYlUSJxRidGL0YyLUY2Ni1RMSZJbnZpc2libGVUaW1lcztGJ0Y5RjtGPkZARkJGREZGRkgvRktRJjAuMGVtRicvRk5GZW4tRiw2JVEod2lkdGhfMkYnRi9GMkZXLUYsNiVRIm1GJ0YvRjJGVy1GLDYlUSJoRidGL0YyRjktRiM2Ji1JI21uR0YkNiRRIjFGJ0Y5LUY2Ni1RJyZwbHVzO0YnRjlGO0Y+RkBGQkZERkZGSC9GS1EsMC4yMjIyMjIyZW1GJy9GTkZqb0ZqbkY5LyUubGluZXRoaWNrbmVzc0dGZW8vJStkZW5vbWFsaWduR1EnY2VudGVyRicvJSludW1hbGlnbkdGYHAvJSliZXZlbGxlZEdGPUY5">LV9JLFR5cGVzZXR0aW5nRzYkJSpwcm90ZWN0ZWRHSShfc3lzbGliRzYiSSxtcHJpbnRzbGFzaEdGKDYkNyM+SSRBXzFHRigqLEkicUdGKCIiIkkod2lkdGhfMkdGKEYwSSJtR0YoRjBJImhHRihGMCwmRjBGMEYyRjAhIiI3I0Yu</Equation></Text-field>
</Output>
<Output><Text-field style="2D Output" layout="Maple Output"><Equation executable="false" style="2D Output" display="LUklbXJvd0c2Iy9JK21vZHVsZW5hbWVHNiJJLFR5cGVzZXR0aW5nR0koX3N5c2xpYkdGJzYmLUkjbWlHRiQ2JVEkQV8yRicvJSdpdGFsaWNHUSV0cnVlRicvJSxtYXRodmFyaWFudEdRJ2l0YWxpY0YnLUkjbW9HRiQ2LVEpJkFzc2lnbjtGJy9GM1Enbm9ybWFsRicvJSZmZW5jZUdRJmZhbHNlRicvJSpzZXBhcmF0b3JHRj0vJSlzdHJldGNoeUdGPS8lKnN5bW1ldHJpY0dGPS8lKGxhcmdlb3BHRj0vJS5tb3ZhYmxlbGltaXRzR0Y9LyUnYWNjZW50R0Y9LyUnbHNwYWNlR1EsMC4yNzc3Nzc4ZW1GJy8lJ3JzcGFjZUdGTC1JJm1mcmFjR0YkNigtRiM2Ji1GLDYlUSh3aWR0aF8yRidGL0YyLUY2Ni1RMSZJbnZpc2libGVUaW1lcztGJ0Y5RjtGPkZARkJGREZGRkgvRktRJjAuMGVtRicvRk5GZW4tRiw2JVEiaEYnRi9GMkY5LUYjNiYtSSNtbkdGJDYkUSIxRidGOS1GNjYtUScmcGx1cztGJ0Y5RjtGPkZARkJGREZGRkgvRktRLDAuMjIyMjIyMmVtRicvRk5GZG8tRiw2JVEibUYnRi9GMkY5LyUubGluZXRoaWNrbmVzc0dGX28vJStkZW5vbWFsaWduR1EnY2VudGVyRicvJSludW1hbGlnbkdGXXAvJSliZXZlbGxlZEdGPUY5">LV9JLFR5cGVzZXR0aW5nRzYkJSpwcm90ZWN0ZWRHSShfc3lzbGliRzYiSSxtcHJpbnRzbGFzaEdGKDYkNyM+SSRBXzJHRigqKEkod2lkdGhfMkdGKCIiIkkiaEdGKEYwLCZGMEYwSSJtR0YoRjAhIiI3I0Yu</Equation></Text-field>
</Output>
<Output><Text-field style="2D Output" layout="Maple Output"><Equation executable="false" style="2D Output" display="LUklbXJvd0c2Iy9JK21vZHVsZW5hbWVHNiJJLFR5cGVzZXR0aW5nR0koX3N5c2xpYkdGJzYmLUkjbWlHRiQ2JVEkSV8xRicvJSdpdGFsaWNHUSV0cnVlRicvJSxtYXRodmFyaWFudEdRJ2l0YWxpY0YnLUkjbW9HRiQ2LVEpJkFzc2lnbjtGJy9GM1Enbm9ybWFsRicvJSZmZW5jZUdRJmZhbHNlRicvJSpzZXBhcmF0b3JHRj0vJSlzdHJldGNoeUdGPS8lKnN5bW1ldHJpY0dGPS8lKGxhcmdlb3BHRj0vJS5tb3ZhYmxlbGltaXRzR0Y9LyUnYWNjZW50R0Y9LyUnbHNwYWNlR1EsMC4yNzc3Nzc4ZW1GJy8lJ3JzcGFjZUdGTC1JJm1mcmFjR0YkNigtRiM2Ki1GLDYlUSJxRidGL0YyLUY2Ni1RMSZJbnZpc2libGVUaW1lcztGJ0Y5RjtGPkZARkJGREZGRkgvRktRJjAuMGVtRicvRk5GZW4tRiw2JVEod2lkdGhfMkYnRi9GMkZXLUklbXN1cEdGJDYlLUYsNiVRIm1GJ0YvRjItSSNtbkdGJDYkUSIzRidGOS8lMXN1cGVyc2NyaXB0c2hpZnRHUSIwRidGVy1GW282JS1GLDYlUSJoRidGL0YyRmBvRmRvRjktRiM2Ji1GYW82JFEjMTJGJ0Y5RlctRltvNiUtSShtZmVuY2VkR0YkNiQtRiM2Ji1GYW82JFEiMUYnRjktRjY2LVEnJnBsdXM7RidGOUY7Rj5GQEZCRkRGRkZIL0ZLUSwwLjIyMjIyMjJlbUYnL0ZORl9xRl1vRjlGOUZgb0Zkb0Y5LyUubGluZXRoaWNrbmVzc0dGanAvJStkZW5vbWFsaWduR1EnY2VudGVyRicvJSludW1hbGlnbkdGZXEvJSliZXZlbGxlZEdGPUY5">LV9JLFR5cGVzZXR0aW5nRzYkJSpwcm90ZWN0ZWRHSShfc3lzbGliRzYiSSxtcHJpbnRzbGFzaEdGKDYkNyM+SSRJXzFHRigsJCosSSJxR0YoIiIiSSh3aWR0aF8yR0YoRjFJIm1HRigiIiRJImhHRihGNCwmRjFGMUYzRjEhIiQjRjEiIzc3I0Yu</Equation></Text-field>
</Output>
<Output><Text-field style="2D Output" layout="Maple Output"><Equation executable="false" style="2D Output" display="LUklbXJvd0c2Iy9JK21vZHVsZW5hbWVHNiJJLFR5cGVzZXR0aW5nR0koX3N5c2xpYkdGJzYmLUkjbWlHRiQ2JVEkSV8yRicvJSdpdGFsaWNHUSV0cnVlRicvJSxtYXRodmFyaWFudEdRJ2l0YWxpY0YnLUkjbW9HRiQ2LVEpJkFzc2lnbjtGJy9GM1Enbm9ybWFsRicvJSZmZW5jZUdRJmZhbHNlRicvJSpzZXBhcmF0b3JHRj0vJSlzdHJldGNoeUdGPS8lKnN5bW1ldHJpY0dGPS8lKGxhcmdlb3BHRj0vJS5tb3ZhYmxlbGltaXRzR0Y9LyUnYWNjZW50R0Y9LyUnbHNwYWNlR1EsMC4yNzc3Nzc4ZW1GJy8lJ3JzcGFjZUdGTC1JJm1mcmFjR0YkNigtRiM2Ji1GLDYlUSh3aWR0aF8yRidGL0YyLUY2Ni1RMSZJbnZpc2libGVUaW1lcztGJ0Y5RjtGPkZARkJGREZGRkgvRktRJjAuMGVtRicvRk5GZW4tSSVtc3VwR0YkNiUtRiw2JVEiaEYnRi9GMi1JI21uR0YkNiRRIjNGJ0Y5LyUxc3VwZXJzY3JpcHRzaGlmdEdRIjBGJ0Y5LUYjNiYtRl5vNiRRIzEyRidGOUZXLUZobjYlLUkobWZlbmNlZEdGJDYkLUYjNiYtRl5vNiRRIjFGJ0Y5LUY2Ni1RJyZwbHVzO0YnRjlGO0Y+RkBGQkZERkZGSC9GS1EsMC4yMjIyMjIyZW1GJy9GTkZncC1GLDYlUSJtRidGL0YyRjlGOUZdb0Zhb0Y5LyUubGluZXRoaWNrbmVzc0dGYnAvJStkZW5vbWFsaWduR1EnY2VudGVyRicvJSludW1hbGlnbkdGYHEvJSliZXZlbGxlZEdGPUY5">LV9JLFR5cGVzZXR0aW5nRzYkJSpwcm90ZWN0ZWRHSShfc3lzbGliRzYiSSxtcHJpbnRzbGFzaEdGKDYkNyM+SSRJXzJHRigsJCooSSh3aWR0aF8yR0YoIiIiSSJoR0YoIiIkLCZGMUYxSSJtR0YoRjEhIiQjRjEiIzc3I0Yu</Equation></Text-field>
</Output>
</Group>
<Group hide-input="false" labelreference="L6997" drawlabel="true" applyint="true" applyrational="true" applyexponent="false">
<Input><Text-field style="Text" layout="Normal">Ratio of Young's moduli (E_1 &gt; E_2, so that n &gt; 1)</Text-field><Text-field prompt="&gt; " style="Maple Input" layout="Normal">n:=E_1/E_2;</Text-field>
</Input>
<Output><Text-field style="2D Output" layout="Maple Output"><Equation executable="false" style="2D Output" display="LUklbXJvd0c2Iy9JK21vZHVsZW5hbWVHNiJJLFR5cGVzZXR0aW5nR0koX3N5c2xpYkdGJzYmLUkjbWlHRiQ2JVEibkYnLyUnaXRhbGljR1EldHJ1ZUYnLyUsbWF0aHZhcmlhbnRHUSdpdGFsaWNGJy1JI21vR0YkNi1RKSZBc3NpZ247RicvRjNRJ25vcm1hbEYnLyUmZmVuY2VHUSZmYWxzZUYnLyUqc2VwYXJhdG9yR0Y9LyUpc3RyZXRjaHlHRj0vJSpzeW1tZXRyaWNHRj0vJShsYXJnZW9wR0Y9LyUubW92YWJsZWxpbWl0c0dGPS8lJ2FjY2VudEdGPS8lJ2xzcGFjZUdRLDAuMjc3Nzc3OGVtRicvJSdyc3BhY2VHRkxGK0Y5">LV9JLFR5cGVzZXR0aW5nRzYkJSpwcm90ZWN0ZWRHSShfc3lzbGliRzYiSSxtcHJpbnRzbGFzaEdGKDYkNyM+SSJuR0YoRi03I0Yt</Equation></Text-field>
</Output>
</Group>
<Group hide-input="false" labelreference="L7001" drawlabel="true" applyint="true" applyrational="true" applyexponent="false">
<Input><Text-field style="Text" layout="Normal">Ideal cross section</Text-field><Text-field prompt="&gt; " style="Maple Input" layout="Normal">A_i:=A_2+n*A_1;</Text-field>
</Input>
<Output><Text-field style="2D Output" layout="Maple Output"><Equation executable="false" style="2D Output" display="LUklbXJvd0c2Iy9JK21vZHVsZW5hbWVHNiJJLFR5cGVzZXR0aW5nR0koX3N5c2xpYkdGJzYoLUkjbWlHRiQ2JVEkQV9pRicvJSdpdGFsaWNHUSV0cnVlRicvJSxtYXRodmFyaWFudEdRJ2l0YWxpY0YnLUkjbW9HRiQ2LVEpJkFzc2lnbjtGJy9GM1Enbm9ybWFsRicvJSZmZW5jZUdRJmZhbHNlRicvJSpzZXBhcmF0b3JHRj0vJSlzdHJldGNoeUdGPS8lKnN5bW1ldHJpY0dGPS8lKGxhcmdlb3BHRj0vJS5tb3ZhYmxlbGltaXRzR0Y9LyUnYWNjZW50R0Y9LyUnbHNwYWNlR1EsMC4yNzc3Nzc4ZW1GJy8lJ3JzcGFjZUdGTC1JJm1mcmFjR0YkNigtRiM2LC1GLDYlUSJxRidGL0YyLUY2Ni1RMSZJbnZpc2libGVUaW1lcztGJ0Y5RjtGPkZARkJGREZGRkgvRktRJjAuMGVtRicvRk5GZW4tRiw2JVEod2lkdGhfMkYnRi9GMkZXLUYsNiVRIm1GJ0YvRjJGVy1GLDYlUSJoRidGL0YyRlctRiw2JVEibkYnRi9GMkY5LUYjNiYtSSNtbkdGJDYkUSIxRidGOS1GNjYtUScmcGx1cztGJ0Y5RjtGPkZARkJGREZGRkgvRktRLDAuMjIyMjIyMmVtRicvRk5GXXBGam5GOS8lLmxpbmV0aGlja25lc3NHRmhvLyUrZGVub21hbGlnbkdRJ2NlbnRlckYnLyUpbnVtYWxpZ25HRmNwLyUpYmV2ZWxsZWRHRj1GaW8tRlA2KC1GIzYmRmduRldGXW9GOUZjb0ZfcEZhcEZkcEZmcEY5">LV9JLFR5cGVzZXR0aW5nRzYkJSpwcm90ZWN0ZWRHSShfc3lzbGliRzYiSSxtcHJpbnRzbGFzaEdGKDYkNyM+SSRBX2lHRigsJiouSSJxR0YoIiIiSSh3aWR0aF8yR0YoRjFJIm1HRihGMUkiaEdGKEYxLCZGMUYxRjNGMSEiIkkibkdGKEYxRjEqKEYyRjFGNEYxRjVGNkYxNyNGLg==</Equation></Text-field>
</Output>
</Group>
<Group hide-input="false" labelreference="L7002" drawlabel="true" applyint="true" applyrational="true" applyexponent="false">
<Input><Text-field style="Text" layout="Normal">Distance between geometric centers of layers</Text-field><Text-field prompt="&gt; " style="Maple Input" layout="Normal">e:=thk_1/2+thk_2/2;</Text-field>
</Input>
<Output><Text-field style="2D Output" layout="Maple Output"><Equation executable="false" style="2D Output" display="LUklbXJvd0c2Iy9JK21vZHVsZW5hbWVHNiJJLFR5cGVzZXR0aW5nR0koX3N5c2xpYkdGJzYoLUkjbWlHRiQ2JVEiZUYnLyUnaXRhbGljR1EldHJ1ZUYnLyUsbWF0aHZhcmlhbnRHUSdpdGFsaWNGJy1JI21vR0YkNi1RKSZBc3NpZ247RicvRjNRJ25vcm1hbEYnLyUmZmVuY2VHUSZmYWxzZUYnLyUqc2VwYXJhdG9yR0Y9LyUpc3RyZXRjaHlHRj0vJSpzeW1tZXRyaWNHRj0vJShsYXJnZW9wR0Y9LyUubW92YWJsZWxpbWl0c0dGPS8lJ2FjY2VudEdGPS8lJ2xzcGFjZUdRLDAuMjc3Nzc3OGVtRicvJSdyc3BhY2VHRkwtSSZtZnJhY0dGJDYoLUYjNiYtRiw2JVEibUYnRi9GMi1GNjYtUTEmSW52aXNpYmxlVGltZXM7RidGOUY7Rj5GQEZCRkRGRkZIL0ZLUSYwLjBlbUYnL0ZORmVuLUYsNiVRImhGJ0YvRjJGOS1GIzYmLUkjbW5HRiQ2JFEiMkYnRjlGVy1JKG1mZW5jZWRHRiQ2JC1GIzYmLUZdbzYkUSIxRidGOS1GNjYtUScmcGx1cztGJ0Y5RjtGPkZARkJGREZGRkgvRktRLDAuMjIyMjIyMmVtRicvRk5GXHBGVEY5RjlGOS8lLmxpbmV0aGlja25lc3NHRmdvLyUrZGVub21hbGlnbkdRJ2NlbnRlckYnLyUpbnVtYWxpZ25HRmJwLyUpYmV2ZWxsZWRHRj1GaG8tRlA2KEZnbkZqbkZecEZgcEZjcEZlcEY5">LV9JLFR5cGVzZXR0aW5nRzYkJSpwcm90ZWN0ZWRHSShfc3lzbGliRzYiSSxtcHJpbnRzbGFzaEdGKDYkNyM+SSJlR0YoLCYqKEkibUdGKCIiIkkiaEdGKEYxLCZGMUYxRjBGMSEiIiNGMSIiIyomRjJGMUYzRjRGNTcjRi4=</Equation></Text-field>
</Output>
</Group>
<Group hide-input="false" labelreference="L6998" drawlabel="true" applyint="true" applyrational="true" applyexponent="false">
<Input><Text-field style="Text" layout="Normal">Position of ideal geometric center of bilayer
Coordinate e_1 from geometric center of layer 1 in direction of layer 2
Coordinate e_2 from geometric center of layer 2 in direction of layer 1</Text-field><Text-field prompt="&gt; " style="Maple Input" layout="Normal">e_1:=A_2/A_i*e;
e_2:=n*A_1/A_i*e;</Text-field>
</Input>
<Output><Text-field style="2D Output" layout="Maple Output"><Equation executable="false" style="2D Output" display="LUklbXJvd0c2Iy9JK21vZHVsZW5hbWVHNiJJLFR5cGVzZXR0aW5nR0koX3N5c2xpYkdGJzYmLUkjbWlHRiQ2JVEkZV8xRicvJSdpdGFsaWNHUSV0cnVlRicvJSxtYXRodmFyaWFudEdRJ2l0YWxpY0YnLUkjbW9HRiQ2LVEpJkFzc2lnbjtGJy9GM1Enbm9ybWFsRicvJSZmZW5jZUdRJmZhbHNlRicvJSpzZXBhcmF0b3JHRj0vJSlzdHJldGNoeUdGPS8lKnN5bW1ldHJpY0dGPS8lKGxhcmdlb3BHRj0vJS5tb3ZhYmxlbGltaXRzR0Y9LyUnYWNjZW50R0Y9LyUnbHNwYWNlR1EsMC4yNzc3Nzc4ZW1GJy8lJ3JzcGFjZUdGTC1JJm1mcmFjR0YkNigtRiM2KC1GLDYlUSh3aWR0aF8yRidGL0YyLUY2Ni1RMSZJbnZpc2libGVUaW1lcztGJ0Y5RjtGPkZARkJGREZGRkgvRktRJjAuMGVtRicvRk5GZW4tRiw2JVEiaEYnRi9GMkZXLUkobWZlbmNlZEdGJDYkLUYjNiYtRlA2KC1GIzYmLUYsNiVRIm1GJ0YvRjJGV0ZnbkY5LUYjNiYtSSNtbkdGJDYkUSIyRidGOUZXLUZbbzYkLUYjNiYtRmlvNiRRIjFGJ0Y5LUY2Ni1RJyZwbHVzO0YnRjlGO0Y+RkBGQkZERkZGSC9GS1EsMC4yMjIyMjIyZW1GJy9GTkZncEZjb0Y5RjlGOS8lLmxpbmV0aGlja25lc3NHRmJwLyUrZGVub21hbGlnbkdRJ2NlbnRlckYnLyUpbnVtYWxpZ25HRl1xLyUpYmV2ZWxsZWRHRj1GY3AtRlA2KEZnbkZmb0ZpcEZbcUZecUZgcUY5RjlGOS1GIzYmRlxwRlctRltvNiQtRiM2Ji1GUDYoLUYjNiwtRiw2JVEicUYnRi9GMkZXRlRGV0Zjb0ZXRmduRlctRiw2JVEibkYnRi9GMkY5Rl5wRmlwRltxRl5xRmBxRmNwLUZQNigtRiM2JkZURldGZ25GOUZecEZpcEZbcUZecUZgcUY5RjlGOUZpcEZbcUZecUZgcUY5">LV9JLFR5cGVzZXR0aW5nRzYkJSpwcm90ZWN0ZWRHSShfc3lzbGliRzYiSSxtcHJpbnRzbGFzaEdGKDYkNyM+SSRlXzFHRigqLEkod2lkdGhfMkdGKCIiIkkiaEdGKEYwLCZGMEYwSSJtR0YoRjAhIiIsJiouSSJxR0YoRjBGL0YwRjNGMEYxRjBGMkY0SSJuR0YoRjBGMCooRi9GMEYxRjBGMkY0RjBGNCwmKihGM0YwRjFGMEYyRjQjRjAiIiMqJkYxRjBGMkY0RjxGMDcjRi4=</Equation></Text-field>
</Output>
<Output><Text-field style="2D Output" layout="Maple Output"><Equation executable="false" style="2D Output" display="LUklbXJvd0c2Iy9JK21vZHVsZW5hbWVHNiJJLFR5cGVzZXR0aW5nR0koX3N5c2xpYkdGJzYmLUkjbWlHRiQ2JVEkZV8yRicvJSdpdGFsaWNHUSV0cnVlRicvJSxtYXRodmFyaWFudEdRJ2l0YWxpY0YnLUkjbW9HRiQ2LVEpJkFzc2lnbjtGJy9GM1Enbm9ybWFsRicvJSZmZW5jZUdRJmZhbHNlRicvJSpzZXBhcmF0b3JHRj0vJSlzdHJldGNoeUdGPS8lKnN5bW1ldHJpY0dGPS8lKGxhcmdlb3BHRj0vJS5tb3ZhYmxlbGltaXRzR0Y9LyUnYWNjZW50R0Y9LyUnbHNwYWNlR1EsMC4yNzc3Nzc4ZW1GJy8lJ3JzcGFjZUdGTC1JJm1mcmFjR0YkNigtRiM2Li1GLDYlUSJuRidGL0YyLUY2Ni1RMSZJbnZpc2libGVUaW1lcztGJ0Y5RjtGPkZARkJGREZGRkgvRktRJjAuMGVtRicvRk5GZW4tRiw2JVEicUYnRi9GMkZXLUYsNiVRKHdpZHRoXzJGJ0YvRjJGVy1GLDYlUSJtRidGL0YyRlctRiw2JVEiaEYnRi9GMkZXLUkobWZlbmNlZEdGJDYkLUYjNiYtRlA2KC1GIzYmRl1vRldGYG9GOS1GIzYmLUkjbW5HRiQ2JFEiMkYnRjlGVy1GZG82JC1GIzYmLUZfcDYkUSIxRidGOS1GNjYtUScmcGx1cztGJ0Y5RjtGPkZARkJGREZGRkgvRktRLDAuMjIyMjIyMmVtRicvRk5GXXFGXW9GOUY5RjkvJS5saW5ldGhpY2tuZXNzR0ZocC8lK2Rlbm9tYWxpZ25HUSdjZW50ZXJGJy8lKW51bWFsaWduR0ZjcS8lKWJldmVsbGVkR0Y9RmlwLUZQNihGYG9GXHBGX3FGYXFGZHFGZnFGOUY5RjktRiM2JkZicEZXLUZkbzYkLUYjNiYtRlA2KC1GIzYsRmduRldGam5GV0Zdb0ZXRmBvRldGVEY5RmRwRl9xRmFxRmRxRmZxRmlwLUZQNigtRiM2JkZqbkZXRmBvRjlGZHBGX3FGYXFGZHFGZnFGOUY5RjlGX3FGYXFGZHFGZnFGOQ==">LV9JLFR5cGVzZXR0aW5nRzYkJSpwcm90ZWN0ZWRHSShfc3lzbGliRzYiSSxtcHJpbnRzbGFzaEdGKDYkNyM+SSRlXzJHRigqMkkibkdGKCIiIkkicUdGKEYwSSh3aWR0aF8yR0YoRjBJIm1HRihGMEkiaEdGKEYwLCZGMEYwRjNGMCEiIiwmKi5GMUYwRjJGMEYzRjBGNEYwRjVGNkYvRjBGMCooRjJGMEY0RjBGNUY2RjBGNiwmKihGM0YwRjRGMEY1RjYjRjAiIiMqJkY0RjBGNUY2RjxGMDcjRi4=</Equation></Text-field>
</Output>
</Group>
<Group hide-input="false" labelreference="L6999" drawlabel="true" applyint="true" applyrational="true" applyexponent="false">
<Input><Text-field style="Text" layout="Normal"><Font bold="true">Ideal second moment of area and ideal bending stiffness of composite bilayer</Font></Text-field><Text-field prompt="&gt; " style="Maple Input" layout="Normal">I_i:=I_2+e_2^2*A_2+n*(I_1+e_1^2*A_1);
EI_i:=E_2*I_i;</Text-field>
</Input>
<Output><Text-field style="2D Output" layout="Maple Output"><Equation executable="false" style="2D Output" display="LUklbXJvd0c2Iy9JK21vZHVsZW5hbWVHNiJJLFR5cGVzZXR0aW5nR0koX3N5c2xpYkdGJzYqLUkjbWlHRiQ2JVEkSV9pRicvJSdpdGFsaWNHUSV0cnVlRicvJSxtYXRodmFyaWFudEdRJ2l0YWxpY0YnLUkjbW9HRiQ2LVEpJkFzc2lnbjtGJy9GM1Enbm9ybWFsRicvJSZmZW5jZUdRJmZhbHNlRicvJSpzZXBhcmF0b3JHRj0vJSlzdHJldGNoeUdGPS8lKnN5bW1ldHJpY0dGPS8lKGxhcmdlb3BHRj0vJS5tb3ZhYmxlbGltaXRzR0Y9LyUnYWNjZW50R0Y9LyUnbHNwYWNlR1EsMC4yNzc3Nzc4ZW1GJy8lJ3JzcGFjZUdGTC1JJm1mcmFjR0YkNigtRiM2Ji1GLDYlUSh3aWR0aF8yRidGL0YyLUY2Ni1RMSZJbnZpc2libGVUaW1lcztGJ0Y5RjtGPkZARkJGREZGRkgvRktRJjAuMGVtRicvRk5GZW4tSSVtc3VwR0YkNiUtRiw2JVEiaEYnRi9GMi1JI21uR0YkNiRRIjNGJ0Y5LyUxc3VwZXJzY3JpcHRzaGlmdEdRIjBGJ0Y5LUYjNiYtRl5vNiRRIzEyRidGOUZXLUZobjYlLUkobWZlbmNlZEdGJDYkLUYjNiYtRl5vNiRRIjFGJ0Y5LUY2Ni1RJyZwbHVzO0YnRjlGO0Y+RkBGQkZERkZGSC9GS1EsMC4yMjIyMjIyZW1GJy9GTkZncC1GLDYlUSJtRidGL0YyRjlGOUZdb0Zhb0Y5LyUubGluZXRoaWNrbmVzc0dGYnAvJStkZW5vbWFsaWduR1EnY2VudGVyRicvJSludW1hbGlnbkdGYHEvJSliZXZlbGxlZEdGPUZjcC1GUDYoLUYjNi4tRmhuNiUtRiw2JVEibkYnRi9GMi1GXm82JFEiMkYnRjlGYW9GVy1GaG42JS1GLDYlUSJxRidGL0YyRl5yRmFvRlctRmhuNiVGVEZdb0Zhb0ZXLUZobjYlRmlwRl5yRmFvRldGZ25GVy1GaG42JS1GXHA2JC1GIzYmLUZQNigtRiM2JkZpcEZXRmpuRjktRiM2JkZeckZXRltwRjlGXHFGXnFGYXFGY3FGY3AtRlA2KEZqbkZkc0ZccUZecUZhcUZjcUY5RjlGXnJGYW9GOS1GIzYmRmlvRlctRmhuNiUtRlxwNiQtRiM2Ji1GUDYoLUYjNixGY3JGV0ZURldGaXBGV0ZqbkZXRltyRjlGXnBGXHFGXnFGYXFGY3FGY3AtRlA2KC1GIzYmRlRGV0ZqbkY5Rl5wRlxxRl5xRmFxRmNxRjlGOUZeckZhb0Y5RlxxRl5xRmFxRmNxRmNwLUYjNiZGW3JGVy1GXHA2JC1GIzYmLUZQNigtRiM2LEZjckZXRmZyRldGaXBGV0ZnbkZXRmpyRjlGaHNGXHFGXnFGYXFGY3FGY3AtRlA2KC1GIzYqRmNyRldGVEZXLUZobjYlRmlwRl1vRmFvRldGZ25GOUZkb0ZccUZecUZhcUZjcUY5RjlGOUY5">LV9JLFR5cGVzZXR0aW5nRzYkJSpwcm90ZWN0ZWRHSShfc3lzbGliRzYiSSxtcHJpbnRzbGFzaEdGKDYkNyM+SSRJX2lHRigsKCooSSh3aWR0aF8yR0YoIiIiSSJoR0YoIiIkLCZGMUYxSSJtR0YoRjEhIiQjRjEiIzcqMkkibkdGKCIiI0kicUdGKEY7RjBGM0Y1RjtGMkYzRjRGNiwmKi5GPEYxRjBGMUY1RjFGMkYxRjQhIiJGOkYxRjEqKEYwRjFGMkYxRjRGP0YxISIjLCYqKEY1RjFGMkYxRjRGPyNGMUY7KiZGMkYxRjRGP0ZERjtGMSomRjpGMSwmKjBGPEYxRjBGM0Y1RjFGMkYzRjRGNkY9RkFGQkY7RjEqLEY8RjFGMEYxRjVGM0YyRjNGNEY2RjdGMUYxNyNGLg==</Equation></Text-field>
</Output>
<Output><Text-field style="2D Output" layout="Maple Output"><Equation executable="false" style="2D Output" display="LUklbXJvd0c2Iy9JK21vZHVsZW5hbWVHNiJJLFR5cGVzZXR0aW5nR0koX3N5c2xpYkdGJzYoLUkjbWlHRiQ2JVElRUlfaUYnLyUnaXRhbGljR1EldHJ1ZUYnLyUsbWF0aHZhcmlhbnRHUSdpdGFsaWNGJy1JI21vR0YkNi1RKSZBc3NpZ247RicvRjNRJ25vcm1hbEYnLyUmZmVuY2VHUSZmYWxzZUYnLyUqc2VwYXJhdG9yR0Y9LyUpc3RyZXRjaHlHRj0vJSpzeW1tZXRyaWNHRj0vJShsYXJnZW9wR0Y9LyUubW92YWJsZWxpbWl0c0dGPS8lJ2FjY2VudEdGPS8lJ2xzcGFjZUdRLDAuMjc3Nzc3OGVtRicvJSdyc3BhY2VHRkwtRiw2JVEkRV8yRidGL0YyLUY2Ni1RMSZJbnZpc2libGVUaW1lcztGJ0Y5RjtGPkZARkJGREZGRkgvRktRJjAuMGVtRicvRk5GVi1JKG1mZW5jZWRHRiQ2JC1GIzYoLUkmbWZyYWNHRiQ2KC1GIzYmLUYsNiVRKHdpZHRoXzJGJ0YvRjJGUi1JJW1zdXBHRiQ2JS1GLDYlUSJoRidGL0YyLUkjbW5HRiQ2JFEiM0YnRjkvJTFzdXBlcnNjcmlwdHNoaWZ0R1EiMEYnRjktRiM2Ji1GZm82JFEjMTJGJ0Y5RlItRmBvNiUtRlk2JC1GIzYmLUZmbzYkUSIxRidGOS1GNjYtUScmcGx1cztGJ0Y5RjtGPkZARkJGREZGRkgvRktRLDAuMjIyMjIyMmVtRicvRk5GXnEtRiw2JVEibUYnRi9GMkY5RjlGZW9GaW9GOS8lLmxpbmV0aGlja25lc3NHRmlwLyUrZGVub21hbGlnbkdRJ2NlbnRlckYnLyUpbnVtYWxpZ25HRmdxLyUpYmV2ZWxsZWRHRj1GanAtRmhuNigtRiM2Li1GYG82JS1GLDYlUSJuRidGL0YyLUZmbzYkUSIyRidGOUZpb0ZSLUZgbzYlLUYsNiVRInFGJ0YvRjJGZXJGaW9GUi1GYG82JUZcb0Zlb0Zpb0ZSLUZgbzYlRmBxRmVyRmlvRlJGX29GUi1GYG82JS1GWTYkLUYjNiYtRmhuNigtRiM2JkZgcUZSRmJvRjktRiM2JkZlckZSRmNwRjlGY3FGZXFGaHFGanFGanAtRmhuNihGYm9GW3RGY3FGZXFGaHFGanFGOUY5RmVyRmlvRjktRiM2JkZhcEZSLUZgbzYlLUZZNiQtRiM2Ji1GaG42KC1GIzYsRmpyRlJGXG9GUkZgcUZSRmJvRlJGYnJGOUZlcEZjcUZlcUZocUZqcUZqcC1GaG42KC1GIzYmRlxvRlJGYm9GOUZlcEZjcUZlcUZocUZqcUY5RjlGZXJGaW9GOUZjcUZlcUZocUZqcUZqcC1GIzYmRmJyRlItRlk2JC1GIzYmLUZobjYoLUYjNixGanJGUkZdc0ZSRmBxRlJGX29GUkZhc0Y5Rl90RmNxRmVxRmhxRmpxRmpwLUZobjYoLUYjNipGanJGUkZcb0ZSLUZgbzYlRmBxRmVvRmlvRlJGX29GOUZccEZjcUZlcUZocUZqcUY5RjlGOUY5RjlGOQ==">LV9JLFR5cGVzZXR0aW5nRzYkJSpwcm90ZWN0ZWRHSShfc3lzbGliRzYiSSxtcHJpbnRzbGFzaEdGKDYkNyM+SSVFSV9pR0YoKiZJJEVfMkdGKCIiIiwoKihJKHdpZHRoXzJHRihGMEkiaEdGKCIiJCwmRjBGMEkibUdGKEYwISIkI0YwIiM3KjJJIm5HRigiIiNJInFHRihGPUYzRjVGN0Y9RjRGNUY2RjgsJiouRj5GMEYzRjBGN0YwRjRGMEY2ISIiRjxGMEYwKihGM0YwRjRGMEY2RkFGMCEiIywmKihGN0YwRjRGMEY2RkEjRjBGPSomRjRGMEY2RkFGRkY9RjAqJkY8RjAsJiowRj5GMEYzRjVGN0YwRjRGNUY2RjhGP0ZDRkRGPUYwKixGPkYwRjNGMEY3RjVGNEY1RjZGOEY5RjBGMEYwNyNGLg==</Equation></Text-field>
</Output>
</Group>
<Group hide-input="false" labelreference="L7000" drawlabel="true" applyint="true" applyrational="true" applyexponent="false">
<Input><Text-field style="Text" layout="Normal"><Font bold="true">Self-weight g </Font>= gamma * thk * width = rho*g * thk * width
(mg/mm^3 * m/s^2 * mm * mm = mg * m/s^2 /mm = kg*m/s^2 /mm *10^(-6) = 10^(-6) N/mm)</Text-field><Text-field prompt="&gt; " style="Maple Input" layout="Normal">g:=rho_1*G*thk_1*width_1+rho_2*G*thk_2*width_2;</Text-field>
</Input>
<Output><Text-field style="2D Output" layout="Maple Output"><Equation executable="false" style="2D Output" display="LUklbXJvd0c2Iy9JK21vZHVsZW5hbWVHNiJJLFR5cGVzZXR0aW5nR0koX3N5c2xpYkdGJzYoLUkjbWlHRiQ2JVEiZ0YnLyUnaXRhbGljR1EldHJ1ZUYnLyUsbWF0aHZhcmlhbnRHUSdpdGFsaWNGJy1JI21vR0YkNi1RKSZBc3NpZ247RicvRjNRJ25vcm1hbEYnLyUmZmVuY2VHUSZmYWxzZUYnLyUqc2VwYXJhdG9yR0Y9LyUpc3RyZXRjaHlHRj0vJSpzeW1tZXRyaWNHRj0vJShsYXJnZW9wR0Y9LyUubW92YWJsZWxpbWl0c0dGPS8lJ2FjY2VudEdGPS8lJ2xzcGFjZUdRLDAuMjc3Nzc3OGVtRicvJSdyc3BhY2VHRkwtSSZtZnJhY0dGJDYoLUYjNi4tRiw2JVEiR0YnRi9GMi1GNjYtUTEmSW52aXNpYmxlVGltZXM7RidGOUY7Rj5GQEZCRkRGRkZIL0ZLUSYwLjBlbUYnL0ZORmVuLUYsNiVRJnJob18xRidGL0YyRlctRiw2JVEibUYnRi9GMkZXLUYsNiVRImhGJ0YvRjJGVy1GLDYlUSJxRidGL0YyRlctRiw2JVEod2lkdGhfMkYnRi9GMkY5LUYjNiYtSSNtbkdGJDYkUSIxRidGOS1GNjYtUScmcGx1cztGJ0Y5RjtGPkZARkJGREZGRkgvRktRLDAuMjIyMjIyMmVtRicvRk5GYHBGam5GOS8lLmxpbmV0aGlja25lc3NHRltwLyUrZGVub21hbGlnbkdRJ2NlbnRlckYnLyUpbnVtYWxpZ25HRmZwLyUpYmV2ZWxsZWRHRj1GXHAtRlA2KC1GIzYqRlRGVy1GLDYlUSZyaG9fMkYnRi9GMkZXRl1vRldGY29GOUZmb0ZicEZkcEZncEZpcEY5">LV9JLFR5cGVzZXR0aW5nRzYkJSpwcm90ZWN0ZWRHSShfc3lzbGliRzYiSSxtcHJpbnRzbGFzaEdGKDYkNyM+SSJnR0YoLCYqMEkiR0dGKCIiIkkmcmhvXzFHRihGMUkibUdGKEYxSSJoR0YoRjEsJkYxRjFGM0YxISIiSSJxR0YoRjFJKHdpZHRoXzJHRihGMUYxKixGMEYxSSZyaG9fMkdGKEYxRjRGMUY1RjZGOEYxRjE3I0Yu</Equation></Text-field>
</Output>
</Group>
<Group hide-input="false" labelreference="L7003" drawlabel="true" applyint="true" applyrational="true" applyexponent="false">
<Input><Text-field style="Text" bold="true" layout="Normal"><Font bold="true">Resulting deflection at tip of cantilever</Font></Text-field><Text-field prompt="&gt; " style="Maple Input" layout="Normal">w:=simplify(g*L^4/EI_i*1/8);</Text-field>
</Input>
<Output><Text-field style="2D Output" layout="Maple Output"><Equation executable="false" style="2D Output" display="LUklbXJvd0c2Iy9JK21vZHVsZW5hbWVHNiJJLFR5cGVzZXR0aW5nR0koX3N5c2xpYkdGJzYmLUkjbWlHRiQ2JVEid0YnLyUnaXRhbGljR1EldHJ1ZUYnLyUsbWF0aHZhcmlhbnRHUSdpdGFsaWNGJy1JI21vR0YkNi1RKSZBc3NpZ247RicvRjNRJ25vcm1hbEYnLyUmZmVuY2VHUSZmYWxzZUYnLyUqc2VwYXJhdG9yR0Y9LyUpc3RyZXRjaHlHRj0vJSpzeW1tZXRyaWNHRj0vJShsYXJnZW9wR0Y9LyUubW92YWJsZWxpbWl0c0dGPS8lJ2FjY2VudEdGPS8lJ2xzcGFjZUdRLDAuMjc3Nzc3OGVtRicvJSdyc3BhY2VHRkwtSSZtZnJhY0dGJDYoLUYjNi4tSSNtbkdGJDYkUSIzRidGOS1GNjYtUTEmSW52aXNpYmxlVGltZXM7RidGOUY7Rj5GQEZCRkRGRkZIL0ZLUSYwLjBlbUYnL0ZORmZuLUYsNiVRIkdGJ0YvRjJGWC1JKG1mZW5jZWRHRiQ2JC1GIzYmLUYjNigtRiw2JVEibUYnRi9GMkZYLUYsNiVRInFGJ0YvRjJGWC1GLDYlUSZyaG9fMUYnRi9GMkY5LUY2Ni1RJyZwbHVzO0YnRjlGO0Y+RkBGQkZERkZGSC9GS1EsMC4yMjIyMjIyZW1GJy9GTkZfcC1GLDYlUSZyaG9fMkYnRi9GMkY5RjlGWC1JJW1zdXBHRiQ2JS1GLDYlUSJMRidGL0YyLUZVNiRRIjRGJ0Y5LyUxc3VwZXJzY3JpcHRzaGlmdEdRIjBGJ0ZYLUZlcDYlLUZcbzYkLUYjNiYtRlU2JFEiMUYnRjlGW3BGYm9GOUY5LUZVNiRRIjJGJ0Y5Rl1xRlgtRlxvNiQtRiM2Ji1GIzYoLUYsNiVRIm5GJ0YvRjJGWEZib0ZYRmVvRjlGW3BGZnFGOUY5RjktRiM2KkZpcUZYLUZlcDYlLUYsNiVRImhGJ0YvRjJGaXFGXXFGWC1GXG82JC1GIzYsLUYjNigtRmVwNiVGYnJGaXFGXXFGWC1GZXA2JUZib0ZqcEZdcUZYLUZlcDYlRmVvRmlxRl1xRjlGW3AtRiM2KkZqcEZYLUZlcDYlRmJvRlRGXXFGWEZickZYRmVvRjlGW3AtRiM2Ki1GVTYkUSI2RidGOUZYLUZlcDYlRmJvRmlxRl1xRlhGYnJGWEZlb0Y5RltwLUYjNipGanBGWEZickZYRmJvRlhGZW9GOUZbcEZmcUY5RjlGWC1GLDYlUSRFXzJGJ0YvRjJGOS8lLmxpbmV0aGlja25lc3NHRmhxLyUrZGVub21hbGlnbkdRJ2NlbnRlckYnLyUpbnVtYWxpZ25HRlx1LyUpYmV2ZWxsZWRHRj1GOQ==">LV9JLFR5cGVzZXR0aW5nRzYkJSpwcm90ZWN0ZWRHSShfc3lzbGliRzYiSSxtcHJpbnRzbGFzaEdGKDYkNyM+SSJ3R0YoLCQqMkkiR0dGKCIiIkkiaEdGKCEiIywmKihJIm1HRihGMUkicUdGKEYxSSZyaG9fMUdGKEYxRjFJJnJob18yR0YoRjFGMUkiTEdGKCIiJSwmRjFGMUY2RjEiIiMsJiooRjZGMUkibkdGKEYxRjdGMUYxRjFGMUYxLCwqKEY2RjtGQEY9RjdGPUYxKihGNiIiJEZARjFGN0YxRjsqKEY2Rj1GQEYxRjdGMSIiJ0Y/RjtGMUYxISIiSSRFXzJHRihGRyNGREY9NyNGLg==</Equation></Text-field>
</Output>
</Group>
<Group hide-input="false" labelreference="L801" drawlabel="true" applyint="true" applyrational="true" applyexponent="false">
<Input><Text-field style="Text" layout="Normal"><Font bold="true">
Data Input of experiment A3</Font>
(A3 curvature wet-to-dry and A3 deflection wet values)
</Text-field>
</Input>
</Group>
<Group hide-input="false" labelreference="L6707" drawlabel="true" applyint="true" applyrational="true" applyexponent="false">
<Input><Text-field prompt="&gt; " style="Maple Input" layout="Normal">Delta_T:=1;
alpha_T_1:=0.0;
#alpha_T_2:=0.035;

width_1:=8.45;
width_2_dry:=20.3; #dry
q:=width_1/width_2;

thk_1:=0.15;
thk_2_dry:=1.43; #dry
m_dry:=thk_1/thk_2_dry;
h_dry:=thk_1+thk_2_dry;

G:=9.81*10^(-6); #gravitational acceleration for calculating self-weight g in N/mm from rho in mg/mm^3
L:=((75.83+76.05)/2-3); #minus 3 mm clamping length in experiment
width_2_wet:=20.61; #wet
thk_2_wet:=1.47; #wet
m_wet:=thk_1/thk_2_wet;
h_wet:=thk_1+thk_2_wet;
rho_1:=1.43219862726875;</Text-field>
</Input>
<Output><Text-field style="2D Output" layout="Maple Output"><Equation executable="false" style="2D Output" display="LUklbXJvd0c2Iy9JK21vZHVsZW5hbWVHNiJJLFR5cGVzZXR0aW5nR0koX3N5c2xpYkdGJzYmLUkjbWlHRiQ2JVEoRGVsdGFfVEYnLyUnaXRhbGljR1EldHJ1ZUYnLyUsbWF0aHZhcmlhbnRHUSdpdGFsaWNGJy1JI21vR0YkNi1RKSZBc3NpZ247RicvRjNRJ25vcm1hbEYnLyUmZmVuY2VHUSZmYWxzZUYnLyUqc2VwYXJhdG9yR0Y9LyUpc3RyZXRjaHlHRj0vJSpzeW1tZXRyaWNHRj0vJShsYXJnZW9wR0Y9LyUubW92YWJsZWxpbWl0c0dGPS8lJ2FjY2VudEdGPS8lJ2xzcGFjZUdRLDAuMjc3Nzc3OGVtRicvJSdyc3BhY2VHRkwtSSNtbkdGJDYkUSIxRidGOUY5">LV9JLFR5cGVzZXR0aW5nRzYkJSpwcm90ZWN0ZWRHSShfc3lzbGliRzYiSSxtcHJpbnRzbGFzaEdGKDYkNyM+SShEZWx0YV9UR0YoIiIiNyNGLg==</Equation></Text-field>
</Output>
<Output><Text-field style="2D Output" layout="Maple Output"><Equation executable="false" style="2D Output" display="LUklbXJvd0c2Iy9JK21vZHVsZW5hbWVHNiJJLFR5cGVzZXR0aW5nR0koX3N5c2xpYkdGJzYmLUkjbWlHRiQ2JVEqYWxwaGFfVF8xRicvJSdpdGFsaWNHUSV0cnVlRicvJSxtYXRodmFyaWFudEdRJ2l0YWxpY0YnLUkjbW9HRiQ2LVEpJkFzc2lnbjtGJy9GM1Enbm9ybWFsRicvJSZmZW5jZUdRJmZhbHNlRicvJSpzZXBhcmF0b3JHRj0vJSlzdHJldGNoeUdGPS8lKnN5bW1ldHJpY0dGPS8lKGxhcmdlb3BHRj0vJS5tb3ZhYmxlbGltaXRzR0Y9LyUnYWNjZW50R0Y9LyUnbHNwYWNlR1EsMC4yNzc3Nzc4ZW1GJy8lJ3JzcGFjZUdGTC1JI21uR0YkNiRRIzAuRidGOUY5">LV9JLFR5cGVzZXR0aW5nRzYkJSpwcm90ZWN0ZWRHSShfc3lzbGliRzYiSSxtcHJpbnRzbGFzaEdGKDYkNyM+SSphbHBoYV9UXzFHRigkIiIhRi83I0Yu</Equation></Text-field>
</Output>
<Output><Text-field style="2D Output" layout="Maple Output"><Equation executable="false" style="2D Output" display="LUklbXJvd0c2Iy9JK21vZHVsZW5hbWVHNiJJLFR5cGVzZXR0aW5nR0koX3N5c2xpYkdGJzYmLUkjbWlHRiQ2JVEod2lkdGhfMUYnLyUnaXRhbGljR1EldHJ1ZUYnLyUsbWF0aHZhcmlhbnRHUSdpdGFsaWNGJy1JI21vR0YkNi1RKSZBc3NpZ247RicvRjNRJ25vcm1hbEYnLyUmZmVuY2VHUSZmYWxzZUYnLyUqc2VwYXJhdG9yR0Y9LyUpc3RyZXRjaHlHRj0vJSpzeW1tZXRyaWNHRj0vJShsYXJnZW9wR0Y9LyUubW92YWJsZWxpbWl0c0dGPS8lJ2FjY2VudEdGPS8lJ2xzcGFjZUdRLDAuMjc3Nzc3OGVtRicvJSdyc3BhY2VHRkwtSSNtbkdGJDYkUSU4LjQ1RidGOUY5">LV9JLFR5cGVzZXR0aW5nRzYkJSpwcm90ZWN0ZWRHSShfc3lzbGliRzYiSSxtcHJpbnRzbGFzaEdGKDYkNyM+SSh3aWR0aF8xR0YoJCIkWCkhIiM3I0Yu</Equation></Text-field>
</Output>
<Output><Text-field style="2D Output" layout="Maple Output"><Equation executable="false" style="2D Output" display="LUklbXJvd0c2Iy9JK21vZHVsZW5hbWVHNiJJLFR5cGVzZXR0aW5nR0koX3N5c2xpYkdGJzYmLUkjbWlHRiQ2JVEsd2lkdGhfMl9kcnlGJy8lJ2l0YWxpY0dRJXRydWVGJy8lLG1hdGh2YXJpYW50R1EnaXRhbGljRictSSNtb0dGJDYtUSkmQXNzaWduO0YnL0YzUSdub3JtYWxGJy8lJmZlbmNlR1EmZmFsc2VGJy8lKnNlcGFyYXRvckdGPS8lKXN0cmV0Y2h5R0Y9LyUqc3ltbWV0cmljR0Y9LyUobGFyZ2VvcEdGPS8lLm1vdmFibGVsaW1pdHNHRj0vJSdhY2NlbnRHRj0vJSdsc3BhY2VHUSwwLjI3Nzc3NzhlbUYnLyUncnNwYWNlR0ZMLUkjbW5HRiQ2JFElMjAuM0YnRjlGOQ==">LV9JLFR5cGVzZXR0aW5nRzYkJSpwcm90ZWN0ZWRHSShfc3lzbGliRzYiSSxtcHJpbnRzbGFzaEdGKDYkNyM+SSx3aWR0aF8yX2RyeUdGKCQiJC4jISIiNyNGLg==</Equation></Text-field>
</Output>
<Output><Text-field style="2D Output" layout="Maple Output"><Equation executable="false" style="2D Output" display="LUklbXJvd0c2Iy9JK21vZHVsZW5hbWVHNiJJLFR5cGVzZXR0aW5nR0koX3N5c2xpYkdGJzYmLUkjbWlHRiQ2JVEicUYnLyUnaXRhbGljR1EldHJ1ZUYnLyUsbWF0aHZhcmlhbnRHUSdpdGFsaWNGJy1JI21vR0YkNi1RKSZBc3NpZ247RicvRjNRJ25vcm1hbEYnLyUmZmVuY2VHUSZmYWxzZUYnLyUqc2VwYXJhdG9yR0Y9LyUpc3RyZXRjaHlHRj0vJSpzeW1tZXRyaWNHRj0vJShsYXJnZW9wR0Y9LyUubW92YWJsZWxpbWl0c0dGPS8lJ2FjY2VudEdGPS8lJ2xzcGFjZUdRLDAuMjc3Nzc3OGVtRicvJSdyc3BhY2VHRkwtSSZtZnJhY0dGJDYoLUkjbW5HRiQ2JFElOC40NUYnRjktRiw2JVEod2lkdGhfMkYnRi9GMi8lLmxpbmV0aGlja25lc3NHUSIxRicvJStkZW5vbWFsaWduR1EnY2VudGVyRicvJSludW1hbGlnbkdGaG4vJSliZXZlbGxlZEdGPUY5">LV9JLFR5cGVzZXR0aW5nRzYkJSpwcm90ZWN0ZWRHSShfc3lzbGliRzYiSSxtcHJpbnRzbGFzaEdGKDYkNyM+SSJxR0YoLCQqJEkod2lkdGhfMkdGKCEiIiQiJFgpISIjNyNGLg==</Equation></Text-field>
</Output>
<Output><Text-field style="2D Output" layout="Maple Output"><Equation executable="false" style="2D Output" display="LUklbXJvd0c2Iy9JK21vZHVsZW5hbWVHNiJJLFR5cGVzZXR0aW5nR0koX3N5c2xpYkdGJzYmLUkjbWlHRiQ2JVEmdGhrXzFGJy8lJ2l0YWxpY0dRJXRydWVGJy8lLG1hdGh2YXJpYW50R1EnaXRhbGljRictSSNtb0dGJDYtUSkmQXNzaWduO0YnL0YzUSdub3JtYWxGJy8lJmZlbmNlR1EmZmFsc2VGJy8lKnNlcGFyYXRvckdGPS8lKXN0cmV0Y2h5R0Y9LyUqc3ltbWV0cmljR0Y9LyUobGFyZ2VvcEdGPS8lLm1vdmFibGVsaW1pdHNHRj0vJSdhY2NlbnRHRj0vJSdsc3BhY2VHUSwwLjI3Nzc3NzhlbUYnLyUncnNwYWNlR0ZMLUkjbW5HRiQ2JFElMC4xNUYnRjlGOQ==">LV9JLFR5cGVzZXR0aW5nRzYkJSpwcm90ZWN0ZWRHSShfc3lzbGliRzYiSSxtcHJpbnRzbGFzaEdGKDYkNyM+SSZ0aGtfMUdGKCQiIzohIiM3I0Yu</Equation></Text-field>
</Output>
<Output><Text-field style="2D Output" layout="Maple Output"><Equation executable="false" style="2D Output" display="LUklbXJvd0c2Iy9JK21vZHVsZW5hbWVHNiJJLFR5cGVzZXR0aW5nR0koX3N5c2xpYkdGJzYmLUkjbWlHRiQ2JVEqdGhrXzJfZHJ5RicvJSdpdGFsaWNHUSV0cnVlRicvJSxtYXRodmFyaWFudEdRJ2l0YWxpY0YnLUkjbW9HRiQ2LVEpJkFzc2lnbjtGJy9GM1Enbm9ybWFsRicvJSZmZW5jZUdRJmZhbHNlRicvJSpzZXBhcmF0b3JHRj0vJSlzdHJldGNoeUdGPS8lKnN5bW1ldHJpY0dGPS8lKGxhcmdlb3BHRj0vJS5tb3ZhYmxlbGltaXRzR0Y9LyUnYWNjZW50R0Y9LyUnbHNwYWNlR1EsMC4yNzc3Nzc4ZW1GJy8lJ3JzcGFjZUdGTC1JI21uR0YkNiRRJTEuNDNGJ0Y5Rjk=">LV9JLFR5cGVzZXR0aW5nRzYkJSpwcm90ZWN0ZWRHSShfc3lzbGliRzYiSSxtcHJpbnRzbGFzaEdGKDYkNyM+SSp0aGtfMl9kcnlHRigkIiRWIiEiIzcjRi4=</Equation></Text-field>
</Output>
<Output><Text-field style="2D Output" layout="Maple Output"><Equation executable="false" style="2D Output" display="LUklbXJvd0c2Iy9JK21vZHVsZW5hbWVHNiJJLFR5cGVzZXR0aW5nR0koX3N5c2xpYkdGJzYmLUkjbWlHRiQ2JVEmbV9kcnlGJy8lJ2l0YWxpY0dRJXRydWVGJy8lLG1hdGh2YXJpYW50R1EnaXRhbGljRictSSNtb0dGJDYtUSkmQXNzaWduO0YnL0YzUSdub3JtYWxGJy8lJmZlbmNlR1EmZmFsc2VGJy8lKnNlcGFyYXRvckdGPS8lKXN0cmV0Y2h5R0Y9LyUqc3ltbWV0cmljR0Y9LyUobGFyZ2VvcEdGPS8lLm1vdmFibGVsaW1pdHNHRj0vJSdhY2NlbnRHRj0vJSdsc3BhY2VHUSwwLjI3Nzc3NzhlbUYnLyUncnNwYWNlR0ZMLUkjbW5HRiQ2JFEtMC4xMDQ4OTUxMDQ5RidGOUY5">LV9JLFR5cGVzZXR0aW5nRzYkJSpwcm90ZWN0ZWRHSShfc3lzbGliRzYiSSxtcHJpbnRzbGFzaEdGKDYkNyM+SSZtX2RyeUdGKCQiK1w1JipbNSEjNTcjRi4=</Equation></Text-field>
</Output>
<Output><Text-field style="2D Output" layout="Maple Output"><Equation executable="false" style="2D Output" display="LUklbXJvd0c2Iy9JK21vZHVsZW5hbWVHNiJJLFR5cGVzZXR0aW5nR0koX3N5c2xpYkdGJzYmLUkjbWlHRiQ2JVEmaF9kcnlGJy8lJ2l0YWxpY0dRJXRydWVGJy8lLG1hdGh2YXJpYW50R1EnaXRhbGljRictSSNtb0dGJDYtUSkmQXNzaWduO0YnL0YzUSdub3JtYWxGJy8lJmZlbmNlR1EmZmFsc2VGJy8lKnNlcGFyYXRvckdGPS8lKXN0cmV0Y2h5R0Y9LyUqc3ltbWV0cmljR0Y9LyUobGFyZ2VvcEdGPS8lLm1vdmFibGVsaW1pdHNHRj0vJSdhY2NlbnRHRj0vJSdsc3BhY2VHUSwwLjI3Nzc3NzhlbUYnLyUncnNwYWNlR0ZMLUkjbW5HRiQ2JFElMS41OEYnRjlGOQ==">LV9JLFR5cGVzZXR0aW5nRzYkJSpwcm90ZWN0ZWRHSShfc3lzbGliRzYiSSxtcHJpbnRzbGFzaEdGKDYkNyM+SSZoX2RyeUdGKCQiJGUiISIjNyNGLg==</Equation></Text-field>
</Output>
<Output><Text-field style="2D Output" layout="Maple Output"><Equation executable="false" style="2D Output" display="LUklbXJvd0c2Iy9JK21vZHVsZW5hbWVHNiJJLFR5cGVzZXR0aW5nR0koX3N5c2xpYkdGJzYoLUkjbWlHRiQ2JVEiR0YnLyUnaXRhbGljR1EldHJ1ZUYnLyUsbWF0aHZhcmlhbnRHUSdpdGFsaWNGJy1JI21vR0YkNi1RKSZBc3NpZ247RicvRjNRJ25vcm1hbEYnLyUmZmVuY2VHUSZmYWxzZUYnLyUqc2VwYXJhdG9yR0Y9LyUpc3RyZXRjaHlHRj0vJSpzeW1tZXRyaWNHRj0vJShsYXJnZW9wR0Y9LyUubW92YWJsZWxpbWl0c0dGPS8lJ2FjY2VudEdGPS8lJ2xzcGFjZUdRLDAuMjc3Nzc3OGVtRicvJSdyc3BhY2VHRkwtSSNtbkdGJDYkUSw5LjgxMDAwMDAwMEYnRjktRjY2LVEoJnRpbWVzO0YnRjlGO0Y+RkBGQkZERkZGSC9GS1EsMC4yMjIyMjIyZW1GJy9GTkZXLUklbXN1cEdGJDYmLUZQNiRRIzEwRidGOS1GUDYkUSsmdW1pbnVzMDs2RidGOS8lMXN1cGVyc2NyaXB0c2hpZnRHUSIwRicvSSttc2VtYW50aWNzR0YkUSJeRidGOQ==">LV9JLFR5cGVzZXR0aW5nRzYkJSpwcm90ZWN0ZWRHSShfc3lzbGliRzYiSSxtcHJpbnRzbGFzaEdGKDYkNyM+SSJHR0YoJCIrKysrNSkqISM6NyNGLg==</Equation></Text-field>
</Output>
<Output><Text-field style="2D Output" layout="Maple Output"><Equation executable="false" style="2D Output" display="LUklbXJvd0c2Iy9JK21vZHVsZW5hbWVHNiJJLFR5cGVzZXR0aW5nR0koX3N5c2xpYkdGJzYmLUkjbWlHRiQ2JVEiTEYnLyUnaXRhbGljR1EldHJ1ZUYnLyUsbWF0aHZhcmlhbnRHUSdpdGFsaWNGJy1JI21vR0YkNi1RKSZBc3NpZ247RicvRjNRJ25vcm1hbEYnLyUmZmVuY2VHUSZmYWxzZUYnLyUqc2VwYXJhdG9yR0Y9LyUpc3RyZXRjaHlHRj0vJSpzeW1tZXRyaWNHRj0vJShsYXJnZW9wR0Y9LyUubW92YWJsZWxpbWl0c0dGPS8lJ2FjY2VudEdGPS8lJ2xzcGFjZUdRLDAuMjc3Nzc3OGVtRicvJSdyc3BhY2VHRkwtSSNtbkdGJDYkUSw3Mi45NDAwMDAwMEYnRjlGOQ==">LV9JLFR5cGVzZXR0aW5nRzYkJSpwcm90ZWN0ZWRHSShfc3lzbGliRzYiSSxtcHJpbnRzbGFzaEdGKDYkNyM+SSJMR0YoJCIrKysrJUgoISIpNyNGLg==</Equation></Text-field>
</Output>
<Output><Text-field style="2D Output" layout="Maple Output"><Equation executable="false" style="2D Output" display="LUklbXJvd0c2Iy9JK21vZHVsZW5hbWVHNiJJLFR5cGVzZXR0aW5nR0koX3N5c2xpYkdGJzYmLUkjbWlHRiQ2JVEsd2lkdGhfMl93ZXRGJy8lJ2l0YWxpY0dRJXRydWVGJy8lLG1hdGh2YXJpYW50R1EnaXRhbGljRictSSNtb0dGJDYtUSkmQXNzaWduO0YnL0YzUSdub3JtYWxGJy8lJmZlbmNlR1EmZmFsc2VGJy8lKnNlcGFyYXRvckdGPS8lKXN0cmV0Y2h5R0Y9LyUqc3ltbWV0cmljR0Y9LyUobGFyZ2VvcEdGPS8lLm1vdmFibGVsaW1pdHNHRj0vJSdhY2NlbnRHRj0vJSdsc3BhY2VHUSwwLjI3Nzc3NzhlbUYnLyUncnNwYWNlR0ZMLUkjbW5HRiQ2JFEmMjAuNjFGJ0Y5Rjk=">LV9JLFR5cGVzZXR0aW5nRzYkJSpwcm90ZWN0ZWRHSShfc3lzbGliRzYiSSxtcHJpbnRzbGFzaEdGKDYkNyM+SSx3aWR0aF8yX3dldEdGKCQiJWg/ISIjNyNGLg==</Equation></Text-field>
</Output>
<Output><Text-field style="2D Output" layout="Maple Output"><Equation executable="false" style="2D Output" display="LUklbXJvd0c2Iy9JK21vZHVsZW5hbWVHNiJJLFR5cGVzZXR0aW5nR0koX3N5c2xpYkdGJzYmLUkjbWlHRiQ2JVEqdGhrXzJfd2V0RicvJSdpdGFsaWNHUSV0cnVlRicvJSxtYXRodmFyaWFudEdRJ2l0YWxpY0YnLUkjbW9HRiQ2LVEpJkFzc2lnbjtGJy9GM1Enbm9ybWFsRicvJSZmZW5jZUdRJmZhbHNlRicvJSpzZXBhcmF0b3JHRj0vJSlzdHJldGNoeUdGPS8lKnN5bW1ldHJpY0dGPS8lKGxhcmdlb3BHRj0vJS5tb3ZhYmxlbGltaXRzR0Y9LyUnYWNjZW50R0Y9LyUnbHNwYWNlR1EsMC4yNzc3Nzc4ZW1GJy8lJ3JzcGFjZUdGTC1JI21uR0YkNiRRJTEuNDdGJ0Y5Rjk=">LV9JLFR5cGVzZXR0aW5nRzYkJSpwcm90ZWN0ZWRHSShfc3lzbGliRzYiSSxtcHJpbnRzbGFzaEdGKDYkNyM+SSp0aGtfMl93ZXRHRigkIiRaIiEiIzcjRi4=</Equation></Text-field>
</Output>
<Output><Text-field style="2D Output" layout="Maple Output"><Equation executable="false" style="2D Output" display="LUklbXJvd0c2Iy9JK21vZHVsZW5hbWVHNiJJLFR5cGVzZXR0aW5nR0koX3N5c2xpYkdGJzYmLUkjbWlHRiQ2JVEmbV93ZXRGJy8lJ2l0YWxpY0dRJXRydWVGJy8lLG1hdGh2YXJpYW50R1EnaXRhbGljRictSSNtb0dGJDYtUSkmQXNzaWduO0YnL0YzUSdub3JtYWxGJy8lJmZlbmNlR1EmZmFsc2VGJy8lKnNlcGFyYXRvckdGPS8lKXN0cmV0Y2h5R0Y9LyUqc3ltbWV0cmljR0Y9LyUobGFyZ2VvcEdGPS8lLm1vdmFibGVsaW1pdHNHRj0vJSdhY2NlbnRHRj0vJSdsc3BhY2VHUSwwLjI3Nzc3NzhlbUYnLyUncnNwYWNlR0ZMLUkjbW5HRiQ2JFEtMC4xMDIwNDA4MTYzRidGOUY5">LV9JLFR5cGVzZXR0aW5nRzYkJSpwcm90ZWN0ZWRHSShfc3lzbGliRzYiSSxtcHJpbnRzbGFzaEdGKDYkNyM+SSZtX3dldEdGKCQiK2oiMy8tIiEjNTcjRi4=</Equation></Text-field>
</Output>
<Output><Text-field style="2D Output" layout="Maple Output"><Equation executable="false" style="2D Output" display="LUklbXJvd0c2Iy9JK21vZHVsZW5hbWVHNiJJLFR5cGVzZXR0aW5nR0koX3N5c2xpYkdGJzYmLUkjbWlHRiQ2JVEmaF93ZXRGJy8lJ2l0YWxpY0dRJXRydWVGJy8lLG1hdGh2YXJpYW50R1EnaXRhbGljRictSSNtb0dGJDYtUSkmQXNzaWduO0YnL0YzUSdub3JtYWxGJy8lJmZlbmNlR1EmZmFsc2VGJy8lKnNlcGFyYXRvckdGPS8lKXN0cmV0Y2h5R0Y9LyUqc3ltbWV0cmljR0Y9LyUobGFyZ2VvcEdGPS8lLm1vdmFibGVsaW1pdHNHRj0vJSdhY2NlbnRHRj0vJSdsc3BhY2VHUSwwLjI3Nzc3NzhlbUYnLyUncnNwYWNlR0ZMLUkjbW5HRiQ2JFElMS42MkYnRjlGOQ==">LV9JLFR5cGVzZXR0aW5nRzYkJSpwcm90ZWN0ZWRHSShfc3lzbGliRzYiSSxtcHJpbnRzbGFzaEdGKDYkNyM+SSZoX3dldEdGKCQiJGkiISIjNyNGLg==</Equation></Text-field>
</Output>
<Output><Text-field style="2D Output" layout="Maple Output"><Equation executable="false" style="2D Output" display="LUklbXJvd0c2Iy9JK21vZHVsZW5hbWVHNiJJLFR5cGVzZXR0aW5nR0koX3N5c2xpYkdGJzYmLUkjbWlHRiQ2JVEmcmhvXzFGJy8lJ2l0YWxpY0dRJXRydWVGJy8lLG1hdGh2YXJpYW50R1EnaXRhbGljRictSSNtb0dGJDYtUSkmQXNzaWduO0YnL0YzUSdub3JtYWxGJy8lJmZlbmNlR1EmZmFsc2VGJy8lKnNlcGFyYXRvckdGPS8lKXN0cmV0Y2h5R0Y9LyUqc3ltbWV0cmljR0Y9LyUobGFyZ2VvcEdGPS8lLm1vdmFibGVsaW1pdHNHRj0vJSdhY2NlbnRHRj0vJSdsc3BhY2VHUSwwLjI3Nzc3NzhlbUYnLyUncnNwYWNlR0ZMLUkjbW5HRiQ2JFExMS40MzIxOTg2MjcyNjg3NUYnRjlGOQ==">LV9JLFR5cGVzZXR0aW5nRzYkJSpwcm90ZWN0ZWRHSShfc3lzbGliRzYiSSxtcHJpbnRzbGFzaEdGKDYkNyM+SSZyaG9fMUdGKCQiMHZvc2kpPks5ISM5NyNGLg==</Equation></Text-field>
</Output>
</Group>
<Group hide-input="false" labelreference="L7384" drawlabel="true" applyint="true" applyrational="true" applyexponent="false">
<Input><Text-field style="Text" layout="Normal">Results from given Materials (for the flexural moduli as measured/recalculated)
coordinates given for curvature results: [n,alpha_T_2,curv_median]
coordinates given for deflection results: [n,rho_2,defl_median]</Text-field><Text-field prompt="&gt; " style="Maple Input" layout="Normal">A3curvwettodry:=pointplot3d([24.9378717584092],[0.035],[0.0288768939168022],symbolsize=20,symbol=solidsphere,color='black'):
A3curvline1:=line([24.9378717584092,0.035,0.0288768939168022],[24.9378717584092,0.035,0],color='black'):
A3curvline2:=line([24.9378717584092,0.035,0],[24.9378717584092,0.01,0],color='black'):
A3curvline3:=line([24.9378717584092,0.035,0],[24.9378717584092,0.1,0],color='black'):
A3curvline4:=line([24.9378717584092,0.035,0],[1,0.035,0],color='black'):
A3curvline5:=line([24.9378717584092,0.035,0],[1000,0.035,0],color='black'):
A3deflectionwet:=pointplot3d([282.049138112765],[1.02945029540668],[7.51103599773884],symbolsize=20,symbol=solidsphere,color='black'):
A3deflectline1:=line([282.049138112765,1.02945029540668,7.51103599773884],[282.049138112765,1.02945029540668,0],color='black'):
A3deflectline2:=line([282.049138112765,1.02945029540668,0],[282.049138112765,0,0],color='black'):
A3deflectline3:=line([282.049138112765,1.02945029540668,0],[282.049138112765,2,0],color='black'):
A3deflectline4:=line([282.049138112765,1.02945029540668,0],[0,1.02945029540668,0],color='black'):
A3deflectline5:=line([282.049138112765,1.02945029540668,0],[1000,1.02945029540668,0],color='black'):</Text-field>
</Input>
</Group>
<Group hide-input="false" labelreference="L6902" drawlabel="true" applyint="true" applyrational="true" applyexponent="false">
<Input><Text-field prompt="&gt; " style="Maple Input" layout="Normal">curv:=simplify(eval(curv,[width_2=width_2_dry,thk_2=thk_2_dry,m=m_dry,h=h_dry]));
w:=simplify(eval(w,[width_2=width_2_wet,thk_2=thk_2_wet,m=m_wet,h=h_wet]));
#w1:=subs(E_1=2,w);
w2:=subs(E_2=1785.38337628827/n,w);
w3:=subs(E_2=1000/n,w);</Text-field>
</Input>
<Output><Text-field style="2D Output" layout="Maple Output"><Equation executable="false" style="2D Output" display="LUklbXJvd0c2Iy9JK21vZHVsZW5hbWVHNiJJLFR5cGVzZXR0aW5nR0koX3N5c2xpYkdGJzYmLUkjbWlHRiQ2JVElY3VydkYnLyUnaXRhbGljR1EldHJ1ZUYnLyUsbWF0aHZhcmlhbnRHUSdpdGFsaWNGJy1JI21vR0YkNi1RKSZBc3NpZ247RicvRjNRJ25vcm1hbEYnLyUmZmVuY2VHUSZmYWxzZUYnLyUqc2VwYXJhdG9yR0Y9LyUpc3RyZXRjaHlHRj0vJSpzeW1tZXRyaWNHRj0vJShsYXJnZW9wR0Y9LyUubW92YWJsZWxpbWl0c0dGPS8lJ2FjY2VudEdGPS8lJ2xzcGFjZUdRLDAuMjc3Nzc3OGVtRicvJSdyc3BhY2VHRkwtSSZtZnJhY0dGJDYoLUYjNigtSSNtbkdGJDYkUS0wLjIwMjQxOTQxMDJGJ0Y5LUY2Ni1RMSZJbnZpc2libGVUaW1lcztGJ0Y5RjtGPkZARkJGREZGRkgvRktRJjAuMGVtRicvRk5GZm4tRiw2JVEqYWxwaGFfVF8yRidGL0YyRlgtRiw2JVEibkYnRi9GMkY5LUYjNigtRiM2Ji1GVTYkUTEwLjAwMDAyMDk3Njk0NDQ3RidGOUZYLUklbXN1cEdGJDYlRltvLUZVNiRRIjJGJ0Y5LyUxc3VwZXJzY3JpcHRzaGlmdEdRIjBGJ0Y5LUY2Ni1RJyZwbHVzO0YnRjlGO0Y+RkBGQkZERkZGSC9GS1EsMC4yMjIyMjIyZW1GJy9GTkZicC1GIzYmLUZVNiRRLTAuMjA0MDU0OTkzMkYnRjlGWEZbb0Y5Rl5wLUZVNiRRIjFGJ0Y5RjkvJS5saW5ldGhpY2tuZXNzR0ZbcS8lK2Rlbm9tYWxpZ25HUSdjZW50ZXJGJy8lKW51bWFsaWduR0ZgcS8lKWJldmVsbGVkR0Y9Rjk=">LV9JLFR5cGVzZXR0aW5nRzYkJSpwcm90ZWN0ZWRHSShfc3lzbGliRzYiSSxtcHJpbnRzbGFzaEdGKDYkNyM+SSVjdXJ2R0YoLCQqKEkqYWxwaGFfVF8yR0YoIiIiSSJuR0YoRjEsKCokRjIiIiMkIitaV3AoNCMhIzlGMiQiK0sqXDAvIyEjNUYxRjEhIiIkIistVD5DP0Y7NyNGLg==</Equation></Text-field>
</Output>
<Output><Text-field style="2D Output" layout="Maple Output"><Equation executable="false" style="2D Output" display="LUklbXJvd0c2Iy9JK21vZHVsZW5hbWVHNiJJLFR5cGVzZXR0aW5nR0koX3N5c2xpYkdGJzYmLUkjbWlHRiQ2JVEid0YnLyUnaXRhbGljR1EldHJ1ZUYnLyUsbWF0aHZhcmlhbnRHUSdpdGFsaWNGJy1JI21vR0YkNi1RKSZBc3NpZ247RicvRjNRJ25vcm1hbEYnLyUmZmVuY2VHUSZmYWxzZUYnLyUqc2VwYXJhdG9yR0Y9LyUpc3RyZXRjaHlHRj0vJSpzeW1tZXRyaWNHRj0vJShsYXJnZW9wR0Y9LyUubW92YWJsZWxpbWl0c0dGPS8lJ2FjY2VudEdGPS8lJ2xzcGFjZUdRLDAuMjc3Nzc3OGVtRicvJSdyc3BhY2VHRkwtSSZtZnJhY0dGJDYoLUYjNigtSSNtbkdGJDYkUSw4LjA2MzgyODMzM0YnRjktRjY2LVExJkludmlzaWJsZVRpbWVzO0YnRjlGO0Y+RkBGQkZERkZGSC9GS1EmMC4wZW1GJy9GTkZmbi1JKG1mZW5jZWRHRiQ2JC1GIzYmLUYsNiVRIm5GJ0YvRjItRjY2LVEnJnBsdXM7RidGOUY7Rj5GQEZCRkRGRkZIL0ZLUSwwLjIyMjIyMjJlbUYnL0ZORmRvLUZVNiRRLDIzLjkwMjcyMTkwRidGOUY5RjlGWC1GaW42JC1GIzYmLUZVNiRRLjAuMDU5OTE3ODA0OTBGJ0Y5RmBvLUYsNiVRJnJob18yRidGL0YyRjlGOUY5LUYjNiYtRiw2JVEkRV8yRidGL0YyRlgtRmluNiQtRiM2KC1GIzYmLUZVNiRRMTAuMDAwMDE4MjI0Mzk1NDhGJ0Y5RlgtSSVtc3VwR0YkNiVGXW8tRlU2JFEiMkYnRjkvJTFzdXBlcnNjcmlwdHNoaWZ0R1EiMEYnRjlGYG8tRiM2Ji1GVTYkUS0wLjE5NDcwMTQzMzFGJ0Y5RlhGXW9GOUZgby1GVTYkUSMxLkYnRjlGOUY5RjkvJS5saW5ldGhpY2tuZXNzR1EiMUYnLyUrZGVub21hbGlnbkdRJ2NlbnRlckYnLyUpbnVtYWxpZ25HRmdyLyUpYmV2ZWxsZWRHRj1GOQ==">LV9JLFR5cGVzZXR0aW5nRzYkJSpwcm90ZWN0ZWRHSShfc3lzbGliRzYiSSxtcHJpbnRzbGFzaEdGKDYkNyM+SSJ3R0YoLCQqKiwmSSJuR0YoIiIiJCIrIT5zLVIjISIpRjJGMiwmJCIrIVwheSIqZiEjNkYySSZyaG9fMkdGKEYyRjJJJEVfMkdGKCEiIiwoKiRGMSIiIyQiK1smUkMjPSEjOUYxJCIrSlYsWj4hIzUkRjIiIiFGMkY8JCIrTCRHUTEpISIqNyNGLg==</Equation></Text-field>
</Output>
<Output><Text-field style="2D Output" layout="Maple Output"><Equation executable="false" style="2D Output" display="LUklbXJvd0c2Iy9JK21vZHVsZW5hbWVHNiJJLFR5cGVzZXR0aW5nR0koX3N5c2xpYkdGJzYmLUkjbWlHRiQ2JVEjdzJGJy8lJ2l0YWxpY0dRJXRydWVGJy8lLG1hdGh2YXJpYW50R1EnaXRhbGljRictSSNtb0dGJDYtUSkmQXNzaWduO0YnL0YzUSdub3JtYWxGJy8lJmZlbmNlR1EmZmFsc2VGJy8lKnNlcGFyYXRvckdGPS8lKXN0cmV0Y2h5R0Y9LyUqc3ltbWV0cmljR0Y9LyUobGFyZ2VvcEdGPS8lLm1vdmFibGVsaW1pdHNHRj0vJSdhY2NlbnRHRj0vJSdsc3BhY2VHUSwwLjI3Nzc3NzhlbUYnLyUncnNwYWNlR0ZMLUkmbWZyYWNHRiQ2KC1GIzYqLUkjbW5HRiQ2JFEvMC4wMDQ1MTY1ODA4MzFGJ0Y5LUY2Ni1RMSZJbnZpc2libGVUaW1lcztGJ0Y5RjtGPkZARkJGREZGRkgvRktRJjAuMGVtRicvRk5GZm4tSShtZmVuY2VkR0YkNiQtRiM2Ji1GLDYlUSJuRidGL0YyLUY2Ni1RJyZwbHVzO0YnRjlGO0Y+RkBGQkZERkZGSC9GS1EsMC4yMjIyMjIyZW1GJy9GTkZkby1GVTYkUSwyMy45MDI3MjE5MEYnRjlGOUY5RlgtRmluNiQtRiM2Ji1GVTYkUS4wLjA1OTkxNzgwNDkwRidGOUZgby1GLDYlUSZyaG9fMkYnRi9GMkY5RjlGWEZdb0Y5LUYjNigtRiM2Ji1GVTYkUTEwLjAwMDAxODIyNDM5NTQ4RidGOUZYLUklbXN1cEdGJDYlRl1vLUZVNiRRIjJGJ0Y5LyUxc3VwZXJzY3JpcHRzaGlmdEdRIjBGJ0Y5RmBvLUYjNiYtRlU2JFEtMC4xOTQ3MDE0MzMxRidGOUZYRl1vRjlGYG8tRlU2JFEjMS5GJ0Y5RjkvJS5saW5ldGhpY2tuZXNzR1EiMUYnLyUrZGVub21hbGlnbkdRJ2NlbnRlckYnLyUpbnVtYWxpZ25HRmByLyUpYmV2ZWxsZWRHRj1GOQ==">LV9JLFR5cGVzZXR0aW5nRzYkJSpwcm90ZWN0ZWRHSShfc3lzbGliRzYiSSxtcHJpbnRzbGFzaEdGKDYkNyM+SSN3MkdGKCwkKiosJkkibkdGKCIiIiQiKyE+cy1SIyEiKUYyRjIsJiQiKyFcIXkiKmYhIzZGMkkmcmhvXzJHRihGMkYyRjFGMiwoKiRGMSIiIyQiK1smUkMjPSEjOUYxJCIrSlYsWj4hIzUkRjIiIiFGMiEiIiQiK0ozZTtYISM3NyNGLg==</Equation></Text-field>
</Output>
<Output><Text-field style="2D Output" layout="Maple Output"><Equation executable="false" style="2D Output" display="LUklbXJvd0c2Iy9JK21vZHVsZW5hbWVHNiJJLFR5cGVzZXR0aW5nR0koX3N5c2xpYkdGJzYmLUkjbWlHRiQ2JVEjdzNGJy8lJ2l0YWxpY0dRJXRydWVGJy8lLG1hdGh2YXJpYW50R1EnaXRhbGljRictSSNtb0dGJDYtUSkmQXNzaWduO0YnL0YzUSdub3JtYWxGJy8lJmZlbmNlR1EmZmFsc2VGJy8lKnNlcGFyYXRvckdGPS8lKXN0cmV0Y2h5R0Y9LyUqc3ltbWV0cmljR0Y9LyUobGFyZ2VvcEdGPS8lLm1vdmFibGVsaW1pdHNHRj0vJSdhY2NlbnRHRj0vJSdsc3BhY2VHUSwwLjI3Nzc3NzhlbUYnLyUncnNwYWNlR0ZMLUkmbWZyYWNHRiQ2KC1GIzYqLUkjbW5HRiQ2JFEvMC4wMDgwNjM4MjgzMzNGJ0Y5LUY2Ni1RMSZJbnZpc2libGVUaW1lcztGJ0Y5RjtGPkZARkJGREZGRkgvRktRJjAuMGVtRicvRk5GZm4tSShtZmVuY2VkR0YkNiQtRiM2Ji1GLDYlUSJuRidGL0YyLUY2Ni1RJyZwbHVzO0YnRjlGO0Y+RkBGQkZERkZGSC9GS1EsMC4yMjIyMjIyZW1GJy9GTkZkby1GVTYkUSwyMy45MDI3MjE5MEYnRjlGOUY5RlgtRmluNiQtRiM2Ji1GVTYkUS4wLjA1OTkxNzgwNDkwRidGOUZgby1GLDYlUSZyaG9fMkYnRi9GMkY5RjlGWEZdb0Y5LUYjNigtRiM2Ji1GVTYkUTEwLjAwMDAxODIyNDM5NTQ4RidGOUZYLUklbXN1cEdGJDYlRl1vLUZVNiRRIjJGJ0Y5LyUxc3VwZXJzY3JpcHRzaGlmdEdRIjBGJ0Y5RmBvLUYjNiYtRlU2JFEtMC4xOTQ3MDE0MzMxRidGOUZYRl1vRjlGYG8tRlU2JFEjMS5GJ0Y5RjkvJS5saW5ldGhpY2tuZXNzR1EiMUYnLyUrZGVub21hbGlnbkdRJ2NlbnRlckYnLyUpbnVtYWxpZ25HRmByLyUpYmV2ZWxsZWRHRj1GOQ==">LV9JLFR5cGVzZXR0aW5nRzYkJSpwcm90ZWN0ZWRHSShfc3lzbGliRzYiSSxtcHJpbnRzbGFzaEdGKDYkNyM+SSN3M0dGKCwkKiosJkkibkdGKCIiIiQiKyE+cy1SIyEiKUYyRjIsJiQiKyFcIXkiKmYhIzZGMkkmcmhvXzJHRihGMkYyRjFGMiwoKiRGMSIiIyQiK1smUkMjPSEjOUYxJCIrSlYsWj4hIzUkRjIiIiFGMiEiIiQiK0wkR1ExKSEjNzcjRi4=</Equation></Text-field>
</Output>
</Group>
<Group hide-input="false" labelreference="L6899" drawlabel="true" applyint="true" applyrational="true" applyexponent="false">
<Input><Text-field style="Text" layout="Normal">3D-plot: linear scaling, contour lines and coloring</Text-field><Text-field prompt="&gt; " style="Maple Input" layout="Normal">curvplot:=plot3d(curv,n=1..1000,alpha_T_2=0.01..0.1,grid=[500,500],style=surfacecontour,shading=zhue,orientation=[99,80,-3],view=[1..1000,0.1..0.01,0..0.09],axesfont=[Times,roman,10],contours=[0.01,0.02,0.03,0.04,0.05,0.06,0.07,0.08,0.09]):
display([curvplot,A3curvwettodry,A3curvline1,A3curvline2,A3curvline3,A3curvline4,A3curvline5]);
</Text-field>
</Input>
<Output><Text-field style="Maple Plot" layout="Maple Plot"><Plot height="700.0" type="three-dimensional" width="700.0" plot-scale="1.0" plot-xtrans="0.0" plot-ytrans="0.0" gridlinevisibility="1" legendvisibility="false">LSUnUExPVDNERzY0LSUlR1JJREc2JzskIiM1ISIiJCImKysiISIiOyQiIiIhIiMkIiIiISIiN2BqbDdgamwkIjFIanpoIz02byIhIz0kIjIzPFw/LlI5ciIhIz4kIjJMLC1CISlmPHUiISM+JCIyWyZbYnMwM3M8ISM+JCIyL28yR00sQyE9ISM+JCIyQl9nSTZBRiQ9ISM+JCIxa0xKJClHL2o9ISM9JCIyaj9tTmxqTCo9ISM+JCIxWyE+UVUlb0I+ISM9JCIwKj0yJT4wUyY+ISM8JCIyQ3RDVidmSyUpPiEjPiQiMXV2ZE1uazk/ISM9JCIyKCpSSVtdblwvIyEjPiQiMVRLM3YjKUd2PyEjPSQiMSQzT2AvNGM1IyEjPSQiMmAjKillOilIZjgjISM+JCIyc3dUZWVdaTsjISM+JCIxNFk0YzhkJz4jISM9JCIxXnVNRUAqb0EjISM9JCIya0YrbSpHQGRBISM+JCIyJD1KJm9tTHZHIyEjPiQiMCdmNVBXJnlKIyEjPCQiMkQhKWV0P3YiW0IhIz4kIjJXazZ3KGZceUIhIz4kIjJqW2t5dTspM0MhIz4kIjFHdDY9djhSQyEjPSQiMk86cSQpR2UlcEMhIz4kIjJiKkhpZSF6KCpcIyEjPiQiMnUkZSgpRykqNElEISM+JCIyKHonRyIqZj8vYyMhIz4kIjI7XyJRcDh1IWYjISM+JCIyTk9NJ1JAMUBFISM+JCIxMXMpKTRIUV5FISM9JCIxSis5IW8uPG8jISM9JCIyRihHUl1XLTdGISM+JCIyWXJYMUFYQnUjISM+JCIybGIpKjMqZm1zRiEjPiQiMiMqUl42dycpSCFHISM+JCIyMkMvOWAyTCRHISM+JCIyRTNkO0lHTydHISM+JCIxMyo0PjJcUipHISM9JCIyJVxGO1UpcFUjSCEjPiQiMSNmOkNoIWZhSCEjPSQiMU0lb0VRNlwpSCEjPSQiMXc3I0g6S18sJCEjPSQiMT1UPEJIYlhJISM9JCIyKWZwVSRwdGUyJCEjPiQiMmN5ek9ZJT4xSiEjPiQiMUZFJFJCOmw4JCEjPSQiMiZvYT0vZyRvOyQhIz4kIjI4SlFXeGNyPiQhIz4kIjJGOiJwV3ZaRkshIz4kIjElKlIlXEopemRLISM9JCIydSRvPiYzPiIpRyQhIz4kIjJCbVxhJilSJT1MISM+JCIxL0RxRDF3W0whIz0kIjFZYCZmUiIzekwhIz0kIjEpPTNpOy0lNE0hIz0kIjIuLmhrJEhzUk0hIz4kIjFzUXIxUC9xTSEjPSQiMTluJ3Baay5dJCEjPSQiMVImPnNDJm9JTiEjPSQiMjlRc3UsMTVjJCEjPiQiMlBBRHh5RThmJCEjPiQiMWwheXpiWjtpJCEjPSQiMTI0Qkckbz5sJCEjPSQiMiVcUFspNCpHI28kISM+JCIxImZPKG8pNEVyJCEjPSQiMm5UKikqUTEkSHUkISM+JCIxZUFDNDlEdFAhIz0kIjIwNSZcekBkLlEhIz4kIjJDJXp1XEgqUSRRISM+JCIxJXkrK3M4VSdRISM9JCIxRk9EIVxNWCpRISM9JCIyJm9rXWdfJlsjUiEjPiQiMSRIZjIud14mUiEjPSQiMU9ALCxvXCYpUiEjPSQiMXlcRXJ2ImUsJSEjPSQiMCN5XlQkUWgvJSEjPCQiMjptcTw2ZmsyJSEjPiQiMS5OLSMpKXpuNSUhIz0kIjFYakZfMTVQVCEjPSQiMSg9SERVQHU7JSEjPSQiMTg/eSM+VXg+JSEjPSQiMWJbLmpIMUdVISM9JCIxJ3AoR0xQUWVVISM9JCIxUjBhLlhxKUclISM9JCIxIlEkenRfLT5WISM9JCIxQWkvV2dNXFYhIz0kIjFsISpIOW9telYhIz0kIjAqPWIlZSgpKjRXISM8JCIxS1ohW04zLlclISM9JCIxdHYwRCJIMVolISM9JCIxOy9KJiopXDRdJSEjPSQiMWVLY2wxRkpYISM9JCIvaCJlViJmaFghIzskIjFVKm9nPzc+ZiUhIz0kIjFuPEt3SEJBWSEjPSQiMTRZZFlQYl9ZISM9JCIxXnUjb151R28lISM9JCIyTUghMyhHJj44WiEjPiQiMU5KTGRnXlZaISM9JCIxd2ZlRm8kUXglISM9JCIxPilReWZkVCFbISM9JCIyWGsiNG8keVckWyEjPiQiMSdbVyRRIip6a1shIz0kIjFHdGYzKj5eKlshIz0kIjA8XSl5MVdEXCEjPCQiMTdJNVw5d2JcISM9JCIxYWVOPkEzJylcISM9JCIxKHAzJyopSFM7XSEjPSQiMUA6JylmUHNZXSEjPSQiMWpWNklYL3hdISM9JCIxMHNPK2BPMl4hIz0kIjFbK2lxZ29QXiEjPSQiMSopRygzJW8rb14hIz0kIjFLZDc2d0spPiYhIz0kIjJOZHk4UVsnR18hIz4kIjEqUko7OnAqZV8hIz0kIjBDJSk9IyoqRypHJiEjPCQiMSQzUEBwNSc+YCEjPSQiMUMqKlFpOSQqXGAhIz0kIjJsd1VFQl8tUSYhIz4kIjE0YypHK3QwVCYhIz0kIjBYW0p4JCozVyYhIzwkIjEjSCxNYTk3WiYhIz0kIjJ2NmFPSk46XSYhIz4kIjAncCFSM2M9YCYhIzwkIjEsKWZUJm88aWIhIz0kIjFWRVRDd1wjZiYhIz0kIjEmW2xZUj1HaSYhIz0kIjFHJD1cO1JKbCYhIz0kIjFwNjxOKmZNbyYhIz0kIjEmKlJVMDJ5OGQhIz0kIjFPb252OTVXZCEjPSQiMXonSGZDQVd4JiEjPSQiMUBEPTtJdS9lISM9JCIxamBWJ3lqXSRlISM9JCIyYj8pb2NYUWxlISM+JCIybC9UcEswZCplISM+JCIxc1E+KDRFZyNmISM9JCIxOW5Xbm9NY2YhIz0kIjFiJipwUHdtJylmISM9JCIxKVJfelMpKXAsJyEjPSQiMEMwI3kiNHQvJyEjPCQiMSIzZSVbKkh3MichIz0kIjFDNHI9MiZ6NSchIz0kIjImXFAnKilbciNRaCEjPiQiMSJmOyNmQWZvaCEjPSQiMkNWcCVISSIqKT4nISM+JCIxdkFzKnpMI0hpISM9JCIxO14oKnBYYmZpISM9JCIxZnpBU2AoKSpHJyEjPSQiMSwzWzVoPj9qISM9JCIxRU90ISlvXl1qISM9JCIxbmspNGxQM1EnISM9JCIwSlI3VWU2VCchIzwkIjFeQFwiPno5VychIz0kIjEmKlx1aCoqenJrISM9JCIxUHkqPnQ/QF0nISM9JCIxeTFELTpXS2whIz0kIjEvTl1zQXdpbCEjPSQiMVlqdlVJMyRmJyEjPSQiMiYpPTRJIlFTQm0hIz4kIjFIP0UkZUNQbCchIz0kIjI6KFteYGAvJW8nISM+JCIyRHJuUDdtVnInISM+JCIxYTAtJSpvb1duISM9JCIxIlF0VW0yXXgnISM9JCIyREFFWFZHYCFvISM+JCIyTzF6Wj9cYyRvISM+JCIxMT4udipwZidvISM9JCIxW1pHWDJIJypvISM9JCIxImZQYl42bSNwISM9JCIxTC96JkdLcCZwISM9JCIxZUsvY0lEKClwISM9JCIxKjQnSEVRZDxxISM9JCIxVSpbbGYlKnkvKCEjPSQiMSR5LG9POiN5cSEjPSQiMURZMFBoYDNyISM9JCIxb3VJMnAmKVFyISM9JCIwSmd2bngicHIhIzwkIjFfSiJ5VylcKj4oISM9JCIxd2YxPSM+KUhzISM9JCIxPik9JCkpKlIsRSghIz0kIjFoO2RlMlkhSCghIz0kIjJNXUMpRzp5P3QhIz4kIjJYTXghKkgtNk4oISM+JCIxJz1JJHBJVSJRKCEjPSQiMUhJZVJRdTZ1ISM9JCIyWCZlJCk0WTFVdSEjPiQiMmNwKTMhUSZRc3UhIz4kIjJ1YFQuOjFGXSghIz4kIjImeVZmP3AtTHYhIz4kIjFAcyUzcFpMYyghIz0kIjFsKzVoJW9PZighIz0kIjExSE5KIyopUmkoISM9JCIyJkhkZywrSmF3ISM+JCIxdSZlPXhJWW8oISM9JCIxOzk2VTomXHIoISM9JCIxZFVPN0JGWHghIz0kIi9yaCMzJGZ2eCEjOyQiMVQqcEcmUSJmIXkhIz0kIjEkeUFKaU1pJHkhIz0kIjE0Y1AkUmJsJ3khIz0kIjBYR087d28qeSEjPCQiMSJIIilRJHA+RnohIz0kIjFNVDgveF5keiEjPSQiMXdwUXUlUXkpeiEjPSQiMCMpUllDZiI9ISkhIzwkIjBtIypbLCFbWyEpISM8JCIxJ1tYXnkrKXkhKSEjPSQiMUYkKVJiOjc0IikhIz0kIjA8XmNLVSVSIikhIzwkIjAsL2Y0aihwIikhIzwkIjFgbzptUTMrIykhIz0kIjEncDRrai8vQikhIz0kIjFQRG0xYXNnIykhIz0kIjFpYCJwPFk1SCkhIz0kIjEuI29yJXBPQCQpISM9JCIxWTVVPHhvXiQpISM9JCIxKilRbihbMz9RKSEjPSQiMUtuI3pESEJUKSEjPSQiMXQmeiJHK2xVJSkhIz0kIjE5Q1YpenFIWikhIz0kIjFiX29vOkguJikhIz0kIjEjM1EqUUJoTCYpISM9JCIxQjQ+NEokUmMpISM9JCIxbVBXelFEJWYpISM9JCIxMm1wXFlkQycpISM9JCIwWFwqPmEqW2wpISM8JCIwSC0tPjtfbykhIzwkIjFMXlhncGA6KCkhIz0kIjFmenFJeCZldSkhIz0kIi8zJzRdeWh4KSEjOyQiMVVPQHIjKlwxKSkhIz0kIjEmW205Lz9vJCkpISM9JCIxRyQ+PCIzOW4pKSEjPSQiMXBAKD5laHUqKSkhIz0kIjAsREFOI3lGKikhIzwkIjFOeVpBSjVlKikhIz0kIjF5MXQjKlFVKSkqKSEjPSQiMF8kKUhtVyg9ISohIzwkIjFpakJMYTFcISohIz0kIjEuIypbLmlReiEqISM9JCIxWT91dHBxNCIqISM9JCIxKSlbKlJ1Ris5KiEjPSQiMTd4QzkmWy48KiEjPSQiMWIwXSVHcDE/KiEjPSQiMSlSYFowISo0QiohIz0kIjFSaStEM0poIyohIz0kIjEiM2ZfZko7SCohIz0kIjFBPl5sQiY+SyohIz0kIjFrWndOSkZfJCohIz0kIjEqZTxnIVJmI1EqISM9JCIxSy9Gd1kiSFQqISM9JCIxdUtfWWFCViUqISM9JCIxOmh4O2lidCUqISM9JCIxZSpHcSlwKFFdKiEjPSQiLz1HZHg+TSYqISM7JCIxVVlgRiY9WGMqISM9JCIxbXV5KEhSW2YqISM9JCIwSlMhbys7RCcqISM8JCIxXkpIUTNbYicqISM9JCIxJSpmYTM7IWVvKiEjPSQiMU4pKXp5Qjc7KCohIz0kIjF5OzBcSldZKCohIz0kIjE+WEk+Und3KCohIz0kIjFXdGIqbyUzMikqISM9JCIxJj01KWZhU1ApKiEjPSQiMUdJMUlpc24pKiEjPSQiMChlSitxLykqKSohIzwkIjE4KG8weG4kRyoqISM9JCIxYTojM2Epb2UqKiEjPSQiMSZSdTVKNCEqKSoqISM9JCIyQHNLIjNJJD4rIiEjPSQiMmsrZV4zbFwrIiEjPSQiMjFIJD1pcip6KyIhIz0kIjJaZDMjUiNINSwiISM9JCIxZlFCOzgxOTUhIzwkIjJKOWZLUiQ0PDUhIz0kIjJzVSVHcWE3PzUhIz0kIjI8cjR0YWRKLSIhIz0kIjElKlxMQycqPUU1ISM8JCIyInktTyw8QUg1ISM9JCIyRWMmUXlQREs1ISM9JCIybiUzVGJlR041ISM9JCIyMzhPQyR6SlE1ISM9JCIxOjlZNCtOVDUhIzwkIjIjKnAnWyczI1FXNSEjPSQiMjwpPl5qVFRaNSEjPSQiMW1zYFNpV101ISM8JCIyLGJpdkp5TTAiISM9JCIyWCR5ZSVSNWwwIiEjPSQiMiY9SmhyQ2FmNSEjPSQiMkZTUSdbWGRpNSEjPSQiMnBvamNpMWMxIiEjPSQiMidwKilvLShRJ281ISM9JCIyUEQ5KHoybnI1ISM9JCIxUSZSbiZHcXU1ISM8JCIxQVt3TFx0eDUhIzwkIjJqNSF6NXF3ITMiISM9JCIyL1I6eTMqeiQzIiEjPSQiMlhuU1s7Sm8zIiEjPSQiMWRmJz1DaikqMyIhIzwkIjI6QyIqKT1gKkc0IiEjPSQiMmNfO2ZSRmY0IiEjPSQiMig0PSVIWmYqKTQiISM9JCIxJTRuKlw6Kj41IiEjPCQiMiR5QipwaUJdNSIhIz0kIjJDbTxTcWIhMzYhIz0kIjJaJUgvInkoMzY2ISM9JCIxSCNvIWUpPlQ2IiEjPCQiMk5eJDROPjo8NiEjPSQiMnd6PUAsJT0/NiEjPSQiMjwzVyIqMztLNyIhIz0kIjFtJHBoO1tpNyIhIzwkIjBsJT5WLUdINiEjOyQiMkUkKj4tSzdCOCIhIz0kIjJuQFhzUldgOCIhIz0kIjI2XXFVWnckUTYhIz0kIjJfeSZIXiYzOTkiISM9JCIyJHA1S0cxV1c2ISM9JCIyUU5ZYHFzdTkiISM9JCIyempyQnkvMDoiISM9JCIxQXBSZm9gYDYhIzwkIjJYP0FrJCpvbDoiISM9JCIyJylbWk0sLCdmNiEjPSQiMkp4cy80TEU7IiEjPSQiMnMwKVxuXm1sNiEjPSQiMjZNQlhDKHBvNiEjPSQiMmNpWzpLSDw8IiEjPSQiMik0UmQpUmhaPCIhIz0kIjJBPipmdk16eDYhIz0kIjJqWkNFYkQzPSIhIz0kIjIzd1wnSHcmUT0iISM9JCIyXC92bXEqKW89IiEjPSQiMUgucSR5QCoqPSIhIzwkIjE4Y3NnUSZIPiIhIzwkIjJ2KjN2UGYpZj4iISM9JCIwPXdaLD0hKj4iISM7JCIyVVksPTRdPz8iISM9JCIyJFtuIylvQDMwNyEjPSQiMkQuX2VDOSIzNyEjPSQiMm1KeEdLWTZAIiEjPSQiMSxFISoqUnlUQCIhIzwkIjJhKXkjcFo1c0AiISM9JCIyeDtgUmJVLUEiISM9JCIyPVh5NGp1S0EiISM9JCIyaHQuITNuSUU3ISM9JCIyLy1IXXlRJEg3ISM9JCIyWElhPyczUEs3ISM9JCIyJylleiFSSFNONyEjPSQiMkYoWzU7XVZRNyEjPSQiMmM6SUo0bjlDIiEjPSQiMihSYTpxIipcVzchIz0kIjJRcyE9WjdgWjchIz0kIjJ6KzFVS2owRCIhIz0kIjJBSEo3UyZmYDchIz0kIjJrZGMjeXVpYzchIz0kIjIwJz1HYiZmJ2Y3ISM9JCIySjkyQmoicGk3ISM9JCIydlVLJDRQc2w3ISM9JCIyOnJkanliKG83ISM9JCIyZCpIUWp5eXI3ISM9JCIyKXojMy8lKj5bRiIhIz0kIjJUY0x1LF95RiIhIz0kIjIlWyllVzQlKTNHIiEjPSQiMUpUW3JoIlJHIiEjPCQiMl9UNCZbI1twRyIhIz0kIjIkKnBNYkshKSoqRyIhIz0kIjJNKSpmRFM3SUgiISM9JCIydkUmZXpXLydIIiEjPSQiMj1iNW1idyEqSCIhIz0kIjFPZWpMJzNASSIhIzwkIjInPTZtNTI5MDghIz0kIjJEUydvKHlzIjM4ISM9JCIxKG82WidbPzY4ISM8JCIyNihwdFRwQjk4ISM9JCIyX0RpKD0hcHNKIiEjPSQiMilSdnkmNCwuSyIhIz0kIjJQI0ciRzxMTEsiISM9JCIxMyJRKVxfT0U4ISM8JCIyMVJqb0soUkg4ISM9JCIyWG4pKVFTSENMIiEjPSQiMWZSIjRbaGFMIiEjPCQiMkhDUnpiJFxROCEjPSQiMnJfa1xqRDpNIiEjPSQiMjkiKSopPnJkWE0iISM9JCIyZDQ6ISp5KmVaOCEjPSQiMiN5Li9tPWldOCEjPSQiMkRtbEklUmxgOCEjPSQiMm0lNDQ/Z29jOCEjPSQiMjRCO3I0PShmOCEjPSQiMlteVFQ8XUZPIiEjPSQiMiIqem02RCN5bDghIz0kIjJNMyM+R1YiKW84ISM9JCIxbXRAMGslPVAiISM8JCIyLWxVQVt5W1AiISM9JCIyVCR6RWYwInpQIiEjPSQiMic9S0hPRSU0USIhIz0kIjJEXT1McnVSUSIhIz0kIjJveVYuejFxUSIhIz0kIjI3MnB0JylRK1IiISM9JCIyT04lUlc0MiRSIiEjPSQiMnpqPjktLmhSIiEjPSQiMUFcVyk0TiIqUiIhIzwkIjJpP3FhPG5AUyIhIz0kIjIwXCZcXyMqPjA5ISM9JCIyV3g/Jkg4QjM5ISM9JCIyKGVnYTFNRTY5ISM9JCIyO01yTlsmSDk5ISM9JCIyYmknZmd2Szw5ISM9JCIyJzQ+aVAnZi5VIiEjPSQiMSU+WllyIlJCOSEjPCQiMiN5Q24iekJrVSIhIz0kIjJEdyhwb2VYSDkhIz0kIjJrL0JkJXpbSzkhIz0kIjFIJFtGLT9iViIhIzwkIjJLaHQoKjRfJlE5ISM9JCIydCopKXp3VGVUOSEjPSQiMjs9Q1FEO1lXIiEjPSQiMmZZXDNMW3dXIiEjPSQiMix2dXlTIW9dOSEjPSQiMU0rIVxbN1BYIiEjPCQiMiU9YCM+Y1duWCIhIz0kIjEsMSYqUW14ZjkhIzwkIjJfKWUoZnIzR1kiISM9JCIyJHA2KyR6U2VZIiEjPSQiMk5YRSsoRygpbzkhIz0kIjJ5dF5xJVwhPloiISM9JCIyQC14Uy1QXFoiISM9JCIxMUI1LCJweloiISM8JCIyJyllRiJ5NisiWyIhIz0kIjF0RzpiSy4lWyIhIzwkIjFkInlATGxxWyIhIzwkIjI3Vy4jNHU0IVwiISM9JCIyYnNHaVtISlwiISM9JCIyKTRTRGo6OydcIiEjPSQiMlJIei1rJD4qXCIhIz0kIjJpZC90ckRBXSIhIz0kIjIwJylIVnpkX10iISM9JCIyWTliOCgpKkczOiEjPSQiMipHL1FbPks2OiEjPSQiMktyMGEtYVZeIiEjPSQiMnUqNFYtaFE8OiEjPSQiMjpHYyV6Ij0vXyIhIz0kIjJUYyJbYy1YQjohIz0kIjIjW29dTEJbRTohIz0kIjJFOEswVDkmSDohIz0kIjJtVGR2W1lEYCIhIz0kIjIzcSNlayZ5YmAiISM9JCIyXil6Z1QxaFE6ISM9JCIyI3BLaj1Ga1Q6ISM9JCIxXyZlY3p1WWEiISM8JCIxT1Fvc29xWjohIzwkIjA3NChcKlEyYiIhIzskIjJZU01uLXJQYiIhIz0kIjImKW9mUDUub2IiISM9JCIyRyhceSE9TilmOiEjPSQiMWQtInlEbkdjIiEjPCQiMidSYiRbTCoqZWMiISM9JCIyUCMzJz1USipvOiEjPSQiMnk1JykpKVtqPmQiISM9JCIyQlI2ZmMmKlxkIiEjPSQiMmtuT0hrRiF5OiEjPSQiMjAnPicqPihmNWUiISM9JCIyWUMoKXB6IjQlZSIhIz0kIjJ0XzdTKFE3KGUiISM9JCIyOSJ5Ll5mOiFmIiEjPSQiMSc0aiFHISk9JGYiISM8JCIyJ3okKTMwLEEnZiIhIz0kIjFrTzYjPV8jKmYiISM8JCIxWypRImZVRy07ISM8JCIyQUJraEw7YGciISM9JCIxOiYqPTglWyQzOyEjPCQiMSp6OS1cIVE2OyEjPCQiMk4zU3NjN1doIiEjPSQiMndPbFVrV3VoIiEjPSQiMjxsIUhAblo/OyEjPSQiMU9mSil6M05pIiEjPCQiMEFUYCgzYUU7ISM7JCIyV11tQiZIZEg7ISM9JCIxKHkiUkhdZ0s7ISM8JCIyNzI8azVQY2oiISM9JCIyYE5VTT1wJ1E7ISM9JCIyJVJ3WWc3cVQ7ISM9JCIxQ0hcUEx0VzshIzwkIjJ3Pz1YVGx4ayIhIz0kIjEjXFY6XCh6XTshIzwkIjJXeG8mbyZIUWwiISM9JCIxZlNmWDsnb2wiISM8JCIxViQ+RXMkKilmOyEjPCQiMUZZayp6REhtIiEjPCQiMjoiKnBtKHkmZm0iISM9JCIyYz4mcGAqKikqbzshIz0kIjIoei9zST8tczshIz0kIjFpZHUyVDB2OyEjPCQiMmwvclo9JzN5OyEjPSQiMUhqemgjPTZvIiEjPDdgamwkIjJHSlMkW1AleXckISM+JCIyMXo4KyYzIWUkUSEjPiQiMiVvc29eenYuUiEjPiQiMVkyT2BdcnJSISM9JCIxKD1NXTpzJ1JTISM9JCIyWG0ybkRIdzUlISM+JCIxVTZRZWpldlQhIz0kIjFAWTBnTWFWVSEjPSQiMSk0RzxjKzpKJSEjPSQiMXc6U2p3WHpWISM9JCIxYV0ybFpUWlchIz0kIjFLJltuJz1QOlghIz0kIjF0PlVvKkdMZSUhIz0kIjBYJjRxZ0deWSEjPCQiMUcqbzw8ViM+WiEjPSQiMTFDV3QtPyh5JSEjPSQiMSUpZTZ2dDpiWyEjPSQiMWkkKnl3VzZCXCEjPSQiMCVHWXk6MiIqXCEjPCQiMEdPLG9HIWZdISM8JCIxZSg0PXkmKXA3JiEjPSQiMmJCJFskKUclXD4mISM+JCIxOW46JikqKipHRSYhIz0kIjEjPklvM2QzTCYhIz0kIjBuLiYpPTkpKVImISM8JCIxWnI8IUhyblkmISM9JCIxKWVdPVJHWmAmISM9JCIxbVNfJFwmby1jISM9JCIxV3Y+JmZVMW4mISM9JCIxQTUob3AqZlFkISM9JCIxKlxXJil6Y2whZSEjPSQiMXp6QCtSXnVlISM9JCIxYzkqPStyQyVmISM9JCIxJypbYy4iRy8sJyEjPSQiMk9QUV8/JlF5ZyEjPiQiMV49InBJVWo5JyEjPSQiMEwmZTMlKkg5aSEjPCQiMTMpZS1eY0FHJyEjPSQiMSdHSz5oOC1OJyEjPSQiMWtkZzgyPD1rISM9JCIxLyN6XyJ5NydbJyEjPSQiMG9fcCJcM2FsISM8JCIwO0UnPT8vQW0hIzwkIjFRJypIPyIqKioqbychIz0kIjE7Sig+QWN6dichIz0kIjJEZllPSzhmI28hIz4kIjFyK0tELyhRKm8hIz0kIjJEXiQqcF9GPSdwISM+JCIwKnBtR1l5SHEhIzwkIjFtL01JPHUoNCghIz0kIjFYUixLKSlwbHIhIz0kIjFCdW9MZmxMcyEjPSQiMSw0T05JaCx0ISM9JCIwUU1xOHEmcHQhIzwkIjImPXlxUXNfUHUhIz4kIjEoSCJRU1ZbMHYhIz0kIjF2WjBVOVd0diEjPSQiMWAjR1BhKVJUdyEjPSQiMUs8U1hjTjR4ISM9JCIyMEB2cXU3dHgoISM+JCIxJ29bKFspcF8leSEjPSQiMUZAVV1wQTh6ISM9JCIxMWM0X1M9Iil6ISM9JCIxJTNwUDpUIlwhKSEjPSQiMWhEV2IjKTQ8IikhIz0kIjFRZzZkYDAmPSkhIz0kIjE8Jip5ZUMsYCMpISM9JCIxJipIWWcmcDRLKSEjPSQiMU9rOGltIyopUSkhIz0kIjE4KjRRdyQpb1gpISM9JCIwUiRbbDMlW18pISM8JCIwKG86bnp6I2YpISM8JCIxWC4kKW9ddmcnKSEjPSQiMUVRXXFAckcoKSEjPSQiMS50PHMjcG16KSEjPSQiMVUyJlFQRVknKSkhIz0kIjFBVV92TWVLKikhIz0kIjEocCg+eDBhKyEqISM9JCIxeTYoKXl3XG8hKiEjPSQiMWJZYSF5YWs4KiEjPSQiMUwiPUEpPVQvIyohIz0kIjBoIipRKSpvQkYqISM8JCIxKDNsYjNFLk0qISM9JCIwYFFzPSRHMyUqISM8JCIxMz8iKilHU2laKiEjPSQiMSZbJmUhUig+VyYqISM9JCIxaSplQVxhQGgqISM9JCIwV0tSZjYsbyohIzwkIjE+ZmcmcG8hWygqISM9JCIxJ1J6c3pEZyIpKiEjPSQiMVBHJiopKkcpUikpKiEjPSQiMTlqaSsrJT4mKiohIz0kIjIjeipILXIqKT4rIiEjPSQiMUZ0Uj9heTM1ISM8JCIyW25rMDgiZTo1ISM9JCIyRS1LMiVvUEE1ISM9JCIyMFAqKjNicyJINSEjPSQiMldybTVFb2YuIiEjPSQiMkAxTTcoUndVNSEjPSQiMFQsOW9mJlw1ISM7JCIyeXZvOlJiajAiISM9JCIyZDVPPDVeSjEiISM9JCIyS1guPiJvJSpwNSEjPSQiMjchMzJBRHV3NSEjPSQiMl85UUFCUU4zIiEjPSQiMSRcMEMlUkwhNCIhIzwkIjIyJUdkXydIcjQiISM9JCIyJik9U0ZPRFI1IiEjPSQiMmtgMkgyQDI2IiEjPSQiMlcpWzIkeTt2NiIhIz0kIjI9QlVLXDdWNyIhIz0kIjF3JjRNPzM2OCIhIzwkIjJQI3BkOFIhejgiISM9JCIyO0ZXUGkqcFc2ISM9JCIyJD47IlJMJlxeNiEjPSQiMW4qeVMvIkhlNiEjPCQiMTpqQ2FuM2w2ISM8JCIySG04V1kjKT08IiEjPSQiMTI1ZXUieSd5NiEjPCQiMlhOW1opUVomPSIhIz0kIjJCcTpcZnBBPiIhIz0kIjAwJDMwYDEqPiIhIzskIjEpUl1fLGhlPyIhIzwkIjJldTxhc2NFQCIhIz0kIjJNNCZlTkNYPjchIz0kIjI6V19kOVtpQSIhIz0kIjJheT5mJlEvTDchIz0kIjJMOCgzbSZSKVI3ISM9JCIyNFthaUZObUMiISM9JCIxSD1VJyk0VmA3ISM8JCIybDwqZSdwRS1FIiEjPSQiMldfY25TQXFFIiEjPSQiMkAoUSNwNj1RRiIhIz0kIjJpQCI0RlFoIUciISM9JCIyUWNlc2A0dUciISM9JCIyPiJmVVpfPyVIIiEjPSQiMiVmS2ZkNCssOCEjPSQiMnNnZ3htJ3oyOCEjPSQiMmAmeiN6UCNmOTghIz0kIjJHSSY0KTMpUUA4ISM9JCIxWkVFKXokPUc4ISM8JCIyWyoqSCUzJnpcTCIhIz0kIjJBTShmPV94VDghIz0kIjIucGsoRzRkWzghIz0kIjIjUT8kKlFtT2I4ISM9JCIyZVEqNFxCO2k4ISM9JCIyUnRtI2YhZSpvOCEjPSQiMncyTSVwUHZ2OCEjPSQiMmRVLCd6JVxEUSIhIz0kIjJMeG8oKj1YJCpRIiEjPSQiMUBoJCoqKjM5J1IiISM8JCIyKm9NNTVtJEhTIiEjPSQiMm0iM0Y/QnQ0OSEjPSQiMlg7US8uR2xUIiEjPSQiMiczYmdTUEtCOSEjPSQiMmkmR3hdJT4sViIhIz0kIjJWP1M0OzpwViIhIz0kIjI8YjI2KDNyVjkhIz0kIjInKipbRiJlMTBYIiEjPSQiMnhDVTlILXRYIiEjPSQiMSZmNDsrKTRrOSEjPCQiMiRScHg2UCozWiIhIz0kIjEoR1c+VSpveDkhIzwkIjFOOzZLXlslWyIhIzwkIjJGKSp5QSUzRyJcIiEjPSQiMjNMWUNidyEpXCIhIz0kIjIleU9oaUEoW10iISM9JCIyaC0ieXN6bTY6ISM9JCIwUFtIb2olPTohIzskIjIiPWQ2JFJmX18iISM9JCIyYjEkRy5eMEs6ISM9JCIyTVRdTSIzJilROiEjPSQiMjZ3PE9fWWNhIiEjPSQiMTReeUxBV186ISM8JCIyclhfUiV6QmY6ISM9JCIxLCk+VGxMZ2MiISM8JCIyJ1tyR2skSEdkIiEjPSQiMSdcYVcyRCd6OiEjPCQiMVc9aSV5P2tlIiEjPCQiMSM+KnklXDtLZiIhIzwkIjBhY1w/NytnIiEjOyQiMnYpUTc6eiFvZyIhIz0kIjJhQiJIRE9nODshIz0kIjImeiZlYUwqUj87ISM9JCIydSNmaVhdPkY7ISM9JCIxdkt6YjIqUmoiISM8JCIyS2lnZlkneVM7ISM9JCIyMyh6N3dAZVo7ISM9JCIyKD1gSCcpeVBhOyEjPSQiMmltaWtmdDZtIiEjPSQiMi4sSW1JcHptIiEjPSQiMWV0ejtdd3U7ISM8JCIyZXFrcHNnOm8iISM9JCIyUDBLclZjJClvIiEjPSQiMjhTKkhaQDomcCIhIz0kIjIjXG5ZZHklPnEiISM9JCIybjRNd2NWKDM8ISM9JCIyN1cseUZSYnIiISM9JCIxKnlveilcTEE8ISM8JCIybjhPIilwSSJIPCEjPSQiMlVbLiQzayNmdCIhIz0kIjFLM1o9QHNVPCEjPCQiMD1RJ0d5Xlw8ISM7JCIxR2IhKVFOSmM8ISM8JCIyPChHKCpbIzRKdyIhIz0kIjInPi05ZlwhKnA8ISM9JCIxbnZJcDFxdzwhIzwkIjJhIlxaempcJHkiISM9JCIxakFrKjMjSCF6IiEjPCQiMTYnNCkqeigzKHoiISM8JCIyJmVwKCo0TilRIT0hIz0kIjJESVcsQXoxIj0hIz0kIjIwbDYuJFxaPD0hIz0kIjIlKSoqeS9rcVUjPSEjPSQiMVlqa11qMUo9ISM8JCIxJXA4MzFpeSQ9ISM8JCIyPS8iKTR4ZFklPSEjPSQiMiQqUVs2W2A5Jj0hIz0kIjJNdDo4PlwjZT0hIz0kIjI4MyRbLFwvbD0hIz0kIjFIL2w2MSU9KD0hIzwkIjJreDw9S08neT0hIz0kIjJXNyYpPi5LYSk9ISM9JCIyQlpfQHVGQSo9ISM9JCIwIyk+QlhCISoqPSEjOyQiMW9yW2kiPmUhPiEjPCQiMkFeYUUoW2g3PiEjPSQiMihmPSNHZTUlPj4hIz0kIjJ3PyopSEgxaSM+ISM9JCIyX2JjSistSSQ+ISM9JCIxLlJLOHh6Uj4hIzwkIjFeN1xCTWZZPiEjPCQiMSpmZU84KlFgPiEjPCQiMkYlZiNRJVs9Zz4hIz0kIjIxSCQqUmIhKXAnPiEjPSQiMiZRMTtraXh0PiEjPSQiMScpekt1PmQhKT4hIzwkIjFNYFwlb250KT4hIzwkIjI6b2lZUmpUKj4hIz0kIjImSCskWzVmNCsjISM9JCIyTlAoKlwiW3YyPyEjPSQiMUBaO0QwYjk/ISM8JCIxcD9MTmlNQD8hIzwkIjE8JSpcWD45Rz8hIzwkIjJYd21jbFBcLiMhIz0kIjJDNk1lT0w8LyMhIz0kIjIyWSxnMkgmWz8hIz0kIjJXISlvaHlDYDAjISM9JCIxX2hMJ1w/QDEjISM8JCIvTl0xaSIqbz8hIzokIjJ1JTNuOz5ydj8hIz0kIjJkPlFvaTJEMyMhIz0kIjJMYTBxTC4kKjMjISM9JCIxIipHPFohKjQnNCMhIzwkIjFOLU1kWipHNSMhIzwkIjJHZTJ2WSFwNEAhIz0kIjFKXG54aFs7QCEjPCQiMiR5QSV5KT1HQkAhIz0kIjJpaTQhKWZ4KzgjISM9JCIxdXA8M0wobzgjISM8JCIxQVZNPSFwTzkjISM8JCIxbTteR1pZXUAhIzwkIjJQLHonUS9FZEAhIz0kIjI7T1kpW2gwa0AhIz0kIjE0UCxmPSYzPCMhIzwkIjFkNT1wdmt4QCEjPCQiMllTWyR6S1clPSMhIz0kIjFgZF4qKSpRNz4jISM8JCIybTQkbypwTSEpPiMhIz0kIjJVV10pNC8kWz8jISM9JCIyQ3o8KzdFO0AjISM9JCIyKFJePUk9VT1BISM9JCIxKVtfLmE8X0EjISM8JCIxTyk+MEQ4P0IjISM8JCIyTT0ob2cqMylRQSEjPSQiMnZfYTNuL2NDIyEjPSQiMXY9LSJRK0NEIyEjPCQiMkxBKj0iNCc+ZkEhIz0kIjFybE4sPSpmRSMhIzwkIjIpPVJfNnZ5c0EhIz0kIjJqRSJwQEtlekEhIz0kIjJWaGU9JCp5akcjISM9JCIyPSdmLVVZPCRIIyEjPSQiMmpJJD5fLigqKkgjISM9JCIyUWxnQjFtbkkjISM9JCIyOStHRHhoTkojISM9JCIyJFxgcCNbZC5LIyEjPSQiMnNwaUc+YHJLIyEjPSQiMVgrLi4qW1JMIyEjPCQiMkZSKD44WXVTQiEjPSQiMmt0a0xLU3ZNIyEjPSQiMlozS04uT1ZOIyEjPSQiMkFWKnBWPDhoQiEjPSQiMjB5bVFYRnpPIyEjPSQiMiVHVC5rSnN1QiEjPSQiMmNaLFUoKT06USMhIz0kIjJLIylvVmU5JClRIyEjPSQiMW9oYCVINV5SIyEjPCQiMmJeLlorMT5TIyEjPSQiMWozKFtyLCgzQyEjPCQiMTYjUV1VKFw6QyEjPCQiMidlYj9OSkhBQyEjPSQiMmwhSFBYKSkzSEMhIz0kIjFhLWFiWCllViMhIzwkIjEpZjJkRSFvVUMhIzwkIjFZXChlKGZaXEMhIzwkIjJPSFVnb3JpWCMhIz0kIjFVJzRpUm5JWSMhIzwkIjIpKilwUDFKJylwQyEjPSQiMnRMV2wiKWVtWiMhIz0kIjEmbzZuX2FNWyMhIzwkIjFIIXpvQl0tXCMhIzwkIjF4ai9aZi8oXCMhIzwkIjJbczhzbFRRXSMhIz0kIjJDMiJRbnRqNUQhIz0kIjBVW3YyTHVeIyEjOyQiMiZvZHIoeUdVXyMhIz0kIjE7Sil5XEM1YCMhIzwkIjBZXSEzLSN5YCMhIzskIjJ1IXlAPWZoV0QhIz0kIjFjXlFHO1ReRCEjPCQiMk9dXyZRdD9lRCEjPSQiMjMmKT4oW0krbEQhIz0kIjEqPigpKWUoKXpyRCEjPCQiMm1hYSFwV2Z5RCEjPSQiMlUqPUF6LFImZSMhIz0kIjIkUSMqUSopZT0jZiMhIz0kIjJpZWMmKmYiKSopZiMhIz0kIjJXJFJzNHR4MEUhIz0kIjEjRyIqKT5JZDdFISM8JCIyJ0gnZSt0byQ+RSEjPSQiMnYoZkFTVztFRSEjPSQiMmRLJFJdLCdIaiMhIz0kIjFwMWNnZXZSRSEjPCQiMm4sRzJkXmxrIyEjPSQiMmBPJiozR1pMbCMhIz0kIjE4RjEiKkg5Z0UhIzwkIjIvMUk3cVFwbSMhIz0kIjEzdVI2V3R0RSEjPCQiMm12azo3STBvIyEjPSQiL0B0SmVLKG8jISM6JCIyd1cqKj1hQFRwIyEjPSQiMSZ6bT9EPDRxIyEjPCQiMlA5TUEnSHIyRiEjPSQiMjhcLENuM1hyIyEjPSQiMVIpb0RRLzhzIyEjPCQiMSg9T0Y0KyJHRiEjPCQiMjdgLkghZSpbdCMhIz0kIjIpeTMyODpwVEYhIz0kIjJuQVFLQShbW0YhIz0kIjJVZDBNJEhHYkYhIz0kIjFBSGRWJ3k/dyMhIzwkIjIocC11YFYoKW9GISM9JCIydGgyUjFxY3gjISM9JCIxaVwydWRZI3kjISM8JCIyJzRCQyVbaCMqeSMhIz0kIjJzbDRXPmRneiMhIz0kIjJaK3hYIUgmRyFHISM9JCIyTE5XWmhbJzRHISM9JCIxLDwiXEtXayJHISM8JCIxWyF6XS5TSyNHISM8JCIxI1JZX3VOKyRHISM8JCIyMHU4YVhKbyRHISM9JCIxKTMiZWxyaVZHISM8JCIyY1ZbZChHVV1HISM9JCIyTnk6ZmU9cyZHISM9JCIxSkozJ0g5UydHISM8JCIyJHovRDErIjMoRyEjPSQiMk0jeVQ7ZGd4RyEjPSQiMXJeZUU5UyUpRyEjPCQiMT5Edk9yPiIqRyEjPCQiMmwnKT5wJUcqeipHISM9JCIyWkAoM2QmKXkvSCEjPSQiMkJjYXNFJWU2SCEjPSQiMi0iPlV4KnokPUghIz0kIjJWRCplKG92XiNIISM9JCIxLW12KFJyPiRIISM8JCIwJlIjejVuKFFIISM7JCIydEgiND1HY1hIISM9JCIxWCdlI0cmZUImSCEjPCQiMk4qZlVRVTpmSCEjPSQiMVRMZlsqXGYnSCEjPCQiMicpb2coZWN1c0ghIz0kIjJDLkcqbzhhekghIz0kIjIuUSY0enFMJylIISM9JCIyJkdGRSp5S0oqSCEjPSQiMXcrVipcRyoqKkghIzwkIjJMVShmNFVzMUkhIz0kIjI7eGsoPio+TiwkISM9JCIxPkAkKkhjSj9JISM8JCIyS1kqNFM4NkZJISM9JCIyOiJvRV1xIVIuJCEjPSQiMihlVFZnRnFTSSEjPSQiMTI6Z3ElKVxaSSEjPCQiMlgmKW8yPSVIYUkhIz0kIjEtaSQ0KikqM2hJISM8JCIwYi42ZyYpeTEkISM7JCIxJSozRjY4b3VJISM8JCIyO0NROS14OTMkISM9JCIyIyplMDt0cyMpMyQhIz0kIjJ5JEh4VCVvXTQkISM9JCIyYUdTPjprPTUkISM9JCIxTHc1aSlmJzNKISM8JCIyOilcRnNiWDpKISM9JCIyYEtVQ0deQTckISM9JCIxdCc0RSpwL0hKISM8JCIyLy14RnFVZTgkISM9JCIxb1YlSFRRRTkkISM8JCIxOzw2QlRWXEohIzwkIjFrIXpLJClIaTokISM8JCIyOFRZTWFESTskISM9JCIxY1BoYDcjKXBKISM8JCIxLzZ5anBod0ohIzwkIjFeJVtSbjdNPSQhIzwkIjEqejpUUTMtPiQhIzwkIjFaSkclNC9xPiQhIzwkIjJZXF1XISkqei5LISM9JCIxVnloOWJmNUshIzwkIjEnPSZ5QzdSPEshIzwkIjJZYF9cJHA9Q0shIz0kIjEkKSk+XmsjKTRCJCEjPCQiMEIoR2IkeXhCJCEjOyQiMXlYWGxTZFdLISM8JCIyYiM+aXYocDhEJCEjPSQiMXQjKnkmW2wiZUshIzwkIjIxaWNmPmhcRSQhIz0kIjJhJ1I3MXB2ckshIz0kIjE3OEg7RWJ5SyEjPCQiMjBtZWtLW2BHJCEjPSQiMTNnaU9TOSNIJCEjPCQiMWRMelkoUiopSCQhIzwkIjEvMidwWE5kSSQhIzwkIjI6MEdyO0pESiQhIz0kIjJjUiZIeG9LPkwhIz0kIjFWRlkoZUFoSyQhIzwkIjI5NEl3SD1ITCQhIz0kIjFSdXoyU3JSTCEjPCQiMSl5a3pyNGxNJCEjPCQiMmI4SyJHYUlgTCEjPSQiMSRbKkhRNjVnTCEjPCQiMUZvWVtvKm9PJCEjPCQiMXVUamVEcHRMISM8JCIxQTohKW8jKVshUSQhIzwkIjAoKW8qeVJHKFEkISM7JCIxPWk4Km96U1IkISM8JCIxbU5JKlJ2M1MkISM8JCIxODRaNDZuMk0hIzwkIjFlI1EnPm9ZOU0hIzwkIjEwYyEpSERFQE0hIzwkIjFgSCgqUiNlIUdNISM8JCIxLC45XVImW1YkISM8JCIxW3dJZydcO1ckISM8JCIxKCpcWnFgV1tNISM8JCIxV0JrITNUX1gkISM8JCIxKW80M3pPP1kkISM8JCIxT3EoNF1LKW9NISM8JCIxJFFXNkBHY1okISM8JCIxSzxKQFJVI1skISM8JCIxeiF6OWo+IypbJCEjPCQiMnVVWTtNOmdcJCEjPSQiMXZQIj0wNkddJCEjPCQiMT42KT53MSc0TiEjPCQiMW4lW0BaLWteJCEjPCQiMTllSiM9KT5CTiEjPCQiMkM7JFsjKlEqKkhOISM9JCIyMV5dRWcqeU9OISM9JCIydiZ5IkdKJmVWTiEjPSQiMTBfKUgtIlFdTiEjPCQiMGJfSnR3cmIkISM7JCIxKSopPkxXc1JjJCEjPCQiMVhzW2AibzJkJCEjPCQiMSRmYU8nUWN4TiEjPCQiMjolPiNRZGZWZSQhIz0kIjIlKUcqKVJHYjZmJCEjPSQiMm1qY1QqNCZ6ZiQhIz0kIjEiKVJLL251L08hIzwkIjFHOFw5Q2E2TyEjPCQiMXcnZVk3USQ9TyEjPCQiMk0tRVskUThETyEjPSQiMkNQJCpcYUg+aiQhIz0kIjBzZ15ERChRTyEjOyQiMnYxR2AnNF9YTyEjPSQiMTphXHZtSl9PISM8JCIwd2ljUTciZk8hIzskIjJ1NUllNDNmbSQhIz0kIjFhdSpmIVFxc08hIzwkIjJEIVs7OyYqXHpPISM9JCIxXkBMRV9IJ28kISM8JCIxKVwqXE80NCRwJCEjPCQiMVlvbVltKSkqcCQhIzwkIjEqPU1vTiNvMVAhIzwkIjJ3YCxxMXlNciQhIz0kIjEnKSlvcnh0LXMkISM8JCIyTUJPdFtwcXMkISM9JCIyO2Uudj5sUXQkISM9JCIyJkc0bjI0bVNQISM9JCIxeCNReWhjdXUkISM8JCIxQGMrR0JEYVAhIzwkIjIlb0g8USFbNXckISM9JCIxOC5NW1AleXckISM8N2BqbCQiMVBGI2ZIJVE1XSEjPSQiMTxZYls+diteISM9JCIxKVwnPSwnPjY+JiEjPSQiMXgkPVFEKFsiRyYhIz0kIjE0LVgxXCY9UCYhIz0kIjEoMyMzZkRBaWEhIz0kIjFvUnI2LWZfYiEjPSQiMVxlTWt5JkhrJiEjPSQiMUh4KHBeREx0JiEjPSQiMTMnNCdwSnBCZSEjPSQiMSpbVEEjMzE5ZiEjPSQiMXBMKFtaR1crJyEjPSQiMSo+MHY3J3olNCchIz0kIjImenE4IXlqXj0nISM+JCIyJmYqb0ZWSmJGJyEjPiQiMCUzUyYzKiplTychIzwkIjE+Ri5RbkVjayEjPSQiMSpmazFSTW1hJyEjPSQiMFsnSFY/K1BtISM8JCIyJTMkR2ZwcHRzJyEjPiQiMSo9ZyZbdHQ8byEjPSQiMXA/PixdNTNwISM9JCIwJlIjUWxzJSkqcCEjPCQiMUplWDEuJSkpMyghIz0kIjE2eDNmej96ciEjPSQiMGY+PGh2JnBzISM8JCIxQDlOa0slKmZ0ISM9JCIxLEwpcCI0Sl11ISM9JCIwPToncCZ5MWEoISM8JCIxaHFDQWkvSnchIz0kIjFUKnlbKFFUQHghIz0kIjFBM15GOnk2eSEjPSQiMS9GOSE9XEAheiEjPSQiMUpYeEtvXiMqeiEjPSQiMTZrUyZbJSlHMykhIz0kIjEjSFEhUUBEdCIpISM9JCIxcyxuIXo+T0UpISM9JCIxYD9JVnUpUk4pISM9JCIxTFIkZjRiVlcpISM9JCIxN2VjW0ZzTSYpISM9JCIxVHc+LC80RCcpISM9JCIxQCZIUTBlYXIpISM9JCIxLjlZMWQjZSEpKSEjPSQiMSRHJDRmTD4nKikpISM9JCIxbF5zNjVjJykqKSEjPSQiMVZxTmsnR3AyKiEjPSQiMUIqKSlwSidIbiIqISM9JCIxYDJpcFJtZCMqISM9JCIxTkVEQTsuWyQqISM9JCIxOlgpW0YqUlElKiEjPSQiMSRSO3YjcHdHJiohIz0kIjF0I1ssZU0iPicqISM9JCIxYCx5S0FdNCgqISM9JCIxTz9UJikpcCkqeiohIz0kIjFrUS9RdkIhKikqISM9JCIxV2RuIT4wMSkqKiEjPSQiMkN3SVZHKDQyNSEjPSQiMi8mUmZcUzg7NSEjPSQiMidRciZbIjM8RDUhIz0kIjJtSz8sZTJVLiIhIz0kIjJXXiRRWFZDVjUhIz0kIjJ3cFkxNiJHXzUhIz0kIjJjKSk0Zih5Smg1ISM9JCIyTzJ0NmthLjIiISM9JCIyO0VPa1MiUno1ISM9JCIyJ1wlKnByIkclKTMiISM9JCIyd2ppcCRcWSg0IiEjPSQiMmMjZUEtPF0xNiEjPSQiMiczISpbbiVRYjYiISM9JCIybj5fRkJ2WDciISM9JCIyWlE6ISkqPmhMNiEjPSQiMkVkeUt3W0U5IiEjPSQiMjF3VCZHYm9eNiEjPSQiMihbXCFRSEEyOyIhIz0kIjJuOG8hZiFmKHA2ISM9JCIyJj44TENlenk2ISM9JCIyeF0lZiplS3k9IiEjPSQiMmRwZFtOcG8+IiEjPSQiMlIpMzc/aCFmPyIhIz0kIjI+MiVRJilHJVxAIiEjPSQiMipmc2tdJ3pSQSIhIz0kIjJ4VzVmVDtJQiIhIz0kIjJkanQ2PWA/QyIhIz0kIjIqPW9WWSoqM143ISM9JCIycCsrPHJFLEUiISM9JCIyXD5qcFpqInA3ISM9JCIySFFFQUMrI3k3ISM9JCIyMmQqWzJxQihHIiEjPSQiMihlRnZzUEYnSCIhIz0kIjFaZixRMEowOCEjPCQiMilIInpLSVpWSiIhIz0kIjJ5SlUmb1NRQjghIz0kIjExYiFRJDNVSzghIzwkIjJRcG8hKmZkOU0iISM9JCIxIyk9TGtWXF04ISM8JCIwMiZmSDZgZjghIzskIjJ6RGVbKnljbzghIz0kIjIzV0AsbS93UCIhIz0kIjFIWVFEOWsnUSIhIzwkIjE8eWshPnljUiIhIzwkIjEwNSJmJlxyLzkhIzwkIjJLPnU2c15QVCIhIz0kIjEiUVBrWyl5QTkhIzwkIjIjcDBxXl8jPVYiISM9JCIyQHZqcCxpM1ciISM9JCIyLiVwQSN5KSopXDkhIz0kIjFHLFxaYiQqZTkhIzwkIjJpSmBGSnN6WSIhIz0kIjJVXTsheSE0cVoiISM9JCIyQXB6SyVlLydbIiEjPSQiMi4pR2EzRTMmXCIhIz0kIjFqZyFRUD5UXSIhIzwkIjI4RHAhUmg6ODohIz0kIjFSQ0wvSD5BOiEjPCQiMnZpJmZwJ0g3YCIhIz0kIjJeIillW1ZtLWEiISM9JCIyTCtBLD8uJFw6ISM9JCIyOD4mUWwqUiRlOiEjPSQiMllQWzF0d3RjIiEjPSQiMkJjNmZcOGtkIiEjPSQiMi52dTZFXWFlIiEjPSQiMiRRelZFcVslZiIhIz0kIjFFNnEiekJOZyIhIzwkIjJZSmtwYmdEaCIhIz0kIjJCXUZBSyhmQDshIz0kIjIxcCFcKDNNMWoiISM9JCIyTShRdl8zblI7ISM9JCIyPTE8IT13cVs7ISM9JCIyJVwtRyRRV3hsIiEjPSQiMnVWViZbNnltOyEjPSQiMmFpMVEieiJlbiIhIz0kIjJNIilwIXpZJltvIiEjPSQiMjkrTFZXIipRcCIhIz0kIjJVPSdmNCNHSHEiISM9JCIyQVBmWyhcJz5yIiEjPSQiMjFjQSx1LDVzIiEjPSQiMidbZFEwJlErdCIhIz0kIjJtJCpbMUZ2IVI8ISM9JCIxREAiZi43Ils8ISM8JCIyRUp2NiEpW3J2IiEjPSQiMmRcUWtjJj1tPCEjPSQiMlBvLDxMQV94IiEjPSQiMjkoWydwNGZVeSIhIz0kIjIlZiFHQSdlSCR6IiEjPSQiMnhDIlxGRUwtPSEjPSQiMmRWYUZScDgiPSEjPSQiMlBpPCFlaFM/PSEjPSQiMmwhM0dCSFdIPSEjPSQiMSYqUmEpb3olUT0hIzwkIjEkPTJRWDt2JT0hIzwkIjFyLjI+S2JjPSEjPCQiMiZlTkwlKSoqZWw9ISM9JCIybHUnZlxuaXU9ISM9JCIxTipmW15qTyk9ISM8JCIyeDZCLEcrRio9ISM9JCIyYEknUVhxdCw+ISM9JCIxJVxcMSJReDU+ISM8JCIyPG83ZmQ1KT4+ISM9JCIwKGU8VHQlKUc+ISM7JCIxZSFSazUlKXkkPiEjPCQiMmRDLTwoMyNwJT4hIz0kIjFIYSdwamRmJj4hIzwkIjE8J0dBUyUqXCc+ISM8JCIxMD1cbjYudT4hIzwkIjJEKlx2S3oxJCk+ISM9JCIyNz09ISlwL0AqPiEjPSQiMXA4R2o5OSw/ISM8JCIyc2JXJkcjeSwsIyEjPSQiMihSeCFRKlxAPj8hIz0kIjIkRzQyZjxERz8hIz0kIjE7VExDJilHUD8hIzwkIjJXSShmKkdEai8jISM9JCIxI1xnWzBpYDAjISM8JCIyKHpPNz8pKVJrPyEjPSQiMiVvb1EmZU5NMiMhIz0kIjIzMF0xTnNDMyMhIz0kIjIpUUsiZjY0OjQjISM9JCIyb1V3NillYStAISM9JCIyW2hSa2sjZTRAISM9JCIxLkdxNiU+Jz1AISM8JCIyOipmJ3A8Y3c3IyEjPSQiMXoiSEElSHBPQCEjPCQiMm9PI1wyKEhkOSMhIz0kIjIuYmJGWm1aOiMhIz0kIjFRKD0hUUshUTsjISM8JCIxRT5HLislRzwjISM8JCIxOV5hb24oPT0jISM8JCIyQkkzUWA4ND4jISM9JCIyLlxyISpIXSoqPiMhIz0kIjIoeVlMa3EpKjNBISM9JCIyOid5ZkhRLT1BISM9JCIyJlw1J1tmZ3FBIyEjPSQiMnZCQyxPKDRPQSEjPSQiMUR1UURUOFhBISM8JCIxODFsISozPGFBISM8JCIyOiFRImZsMktFIyEjPSQiMiYqKXA8QFdDc0EhIz0kIjFzLFcnPSJHIkcjISM8JCIyLk8uPCZ6SiFIIyEjPSQiMidbbCdwcmEkKkgjISM9JCIybXRIQVsiUjNCISM9JCIyWSNIXFojR3VKIyEjPSQiMkI2Y0YsbGtLIyEjPSQiMi5JPiF5PF1OQiEjPSQiMk1bI0dWJlFYTSMhIz0kIjI5blgmM2BkYEIhIz0kIjFmKTNRMjdFTyMhIzwkIjJ1L3MhUilbO1AjISM9JCIxTl9ML2NvIVEjISM8JCIyUVUpZnBCcypRIyEjPSQiMj1oaFs4ZigpUiMhIz0kIjJZekMsIWZ6MkMhIz0kIjJFKXpRbEUkb1QjISM9JCIyMTxeMVZwZVUjISM9JCIyJ2VWImY+MVxWIyEjPSQiMmlheDYnSCVSVyMhIz0kIjJZdFNrc3pIWCMhIz0kIjJBI1JxIlw7P1kjISM9JCIyYTVucERgNVojISM9JCIyTUhJQS0hNCFbIyEjPSQiMSNbJFwoeUUiKlsjISM8JCIyKHBtdl9OOylcIyEjPSQiMngmKT4hPS4/MkQhIz0kIjJkLyRHJDNQaV4jISM9JCIyUEJZJltRRkREISM9JCIyPFU0UWg1VmAjISM9JCIyWGdzIXp0TVZEISM9JCIyRHpOVjklUV9EISM9JCIyMCkqKWY0NFVoRCEjPSQiMiZvQCdbbmQvZCMhIz0kIjJzTkQsVyVcekQhIz0kIjJYYSlRMDdgKWUjISM9JCIyRHReMSh6YyhmIyEjPSQiMTtcImZ0L21nIyEjPCQiMS8ieTZdVGNoIyEjPCQiMjxIVGtFeVlpIyEjPSQiMih6V3FKXXJMRSEjPSQiMiVvdydwel5GayMhIz0kIjJkJjNCaSYpeV5FISM9JCIyUC8lXEZgIzNtIyEjPSQiMnNBZEY0aSlwRSEjPSQiMl9UPyFlKSkqKXlFISM9JCIyRGckR0JjJHpvIyEjPSQiMjd6WSYpUXNwcCMhIz0kIjF6KjRROjRncSMhIzwkIjFuSjI+Zi86RiEjPCQiMWJqTCVvIzNDRiEjPCQiMVEmKmZcJT5KdCMhIzwkIjJjc2lbQGNAdSMhIz0kIjJPImY3ISlIPl5GISM9JCIyOzUqUVgoSC13IyEjPSQiMi5IXzFebSNwRiEjPSQiMiR5YSJmRi4keUYhIz0kIjJjbXk2L1N0eSMhIz0kIjFcPVcxb1AneiMhIzwkIjFQXXFyTlQwRyEjPCQiMmJBb3BMXVciRyEjPSQiMkdUSkE1KFtCRyEjPSQiMjpnJVxuUV9LRyEjPSQiMiYqeWRGamc6JUchIz0kIjJvKDQtKVIoZl1HISM9JCIyLjslR2pUamZHISM9JCIyJFt0YUc0bm9HISM9JCIyamA1UXAyeChHISM9JCIyVnN0IWZXdScpRyEjPSQiMkIicExDN3kmKkchIz0kIi8sZyopeiJbIUghIzokIjEpR2pbdmFRIkghIzwkIjFyazc/OipHI0ghIzwkIjFmJypRJkdHPiRIISM8JCIydSVHbF1dJzQlSCEjPSQiMlouO2YiPStdSCEjPSQiMk1BejZlUSFmSCEjPSQiMjlUVWtNdiFvSCEjPSQiMiUqZjA8NjdyKEghIz0kIjJBeW9wKClbaClIISM9JCIyLSg+QlVjPSYqSCEjPSQiMidlXlwyQ0EvSSEjPSQiMm1NZUY8ZkssJCEjPSQiMllgQCFRZkhBSSEjPSQiMkVzJUcuRkxKSSEjPSQiMjEiemFvJXAuLyQhIz0kIjInKTQ2UUIxJVxJISM9JCIyOUd1ISoqSFdlSSEjPSQiMiVwdUxrKHp1MSQhIz0kIjJ4bCsnSGxed0khIz0kIjJhJVEnW0hgYjMkISM9JCIyTS5GLDEhZiU0JCEjPSQiMjxBIVJEb2kuSiEjPSQiMTRNbCFmakU2JCEjPCQiMkFmO2ZOKzw3JCEjPSQiMSJ5ejY3UDI4JCEjPCQiMW9IVycpUXhSSiEjPCQiMWNocV4xIilbSiEjPCQiMVckcHBUWnk6JCEjPCQiMUtEQiM9JSlvOyQhIzwkIjBzJlxaNCNmPCQhIzskIjEvKmVGcmRcPSQhIzwkIjEjNEEheVcqUj4kISM8JCIwRyZHVjcuLkshIzskIjFvJVsmMyFvP0AkISM8JCIyYWw2UXgvNkEkISM9JCIyTSVbMlI6OUlLISM9JCIyOS5RVkl5IlJLISM9JCIxOTdncF1AW0shIzwkIjEuVydbJD1EZEshIzwkIjEiZkYsZylHbUshIzwkIjF6MlJsYEt2SyEjPCQiMW5SbElATyVHJCEjPCQiMWJyImYqKSlSJEgkISM8JCIyRE0hPWhjVi1MISM9JCIxRU5XRUNaNkwhIzwkIjE4bnEiPjQwSyQhIzwkIjJDISpwcCZmYUhMISM9JCIyLzRMQXMjZVFMISM9JCIxeWlcKFs+d00kISM8JCIya1lmRkRjbU4kISM9JCIyV2xBIT1JcGxMISM9JCIxUGVHJHlIWlAkISM8JCIxQyFcJltsdyRRJCEjPCQiMThBIlFKLkdSJCEjPCQiMSxhMnorJT1TJCEjPCQiMSllUVYlbygzVCQhIzwkIjJ2eCwnNE8iKj5NISM9JCIyYidcJ1tQXSpHTSEjPSQiMk46Ryw5KCl6ViQhIz0kIjFPOFIwUi1aTSEjPCQiMUJYbHExMWNNISM8JCIxN3giZlYoNGxNISM8JCIvND0sVTh1TSEjOiQiMSgzV2snNDwkWyQhIzwkIjF4c3FKeD8jXCQhIzwkIjFsLyhwXFc3XSQhIzwkIjFaT0JpN0c1TiEjPCQiMU5vXEYhPSQ+TiEjPCQiMUIrdyN6YSRHTiEjPCQiMTZLLWU6UlBOISM8JCIyJSlSJ0dCJEdrYSQhIz0kIjJrZVwmKTNsYWIkISM9JCIxd0YiUSY9XWtOISM8JCIxZmYyPidRTmQkISM8JCIxWSJSVlF2RGUkISM8JCIxTUJnXEBoImYkISM8JCIxQWInWyIqWzFnJCEjPCQiMHJHLG8mbzRPISM7JCIydyo9UlhDcz1PISM9JCIxJzNiMUBmeGkkISM8JCIwRj1mKGZ6T08hIzskIjJ1WCI9VEYkZWskISM9JCIyYWtXa11wW2wkISM9JCIxTXlxcmkhUm0kISM8JCIyOS1ycC5WSG4kISM9JCIyJTRVQi0pej5vJCEjPSQiMnVSKFxubCwicCQhIz0kIjIxZWdGTGArcSQhIz0kIjInb1AtKTQhNDRQISM9JCIybSZwR2pvNz1QISM9JCIyWTldJkdPO0ZQISM9JCIxTEwiUVIraXQkISM8JCIyMV93IWZyQlhQISM9JCIyJzMoUlYjUkZhUCEjPSQiMSIqR2cqbzVMdyQhIzwkIjAzbVtYWkJ4JCEjOyQiMW4jSCxBJVEieSQhIzwkIjFiQ1ImKTRVIXokISM8JCIyV2tiMXZkJSp6JCEjPSQiMUspPWZeJVwzUSEjPCQiMC0jPSJHSnYiUSEjOyQiMS1fV1khb2wjUSEjPCQiMSJSMzwiW2dOUSEjPCQiMXk6KHBkVFklUSEjPCQiMW1aQlUkeU8mUSEjPCQiMWF6XDJecmlRISM8JCIyTzloRig9dnJRISM9JCIxSlYtUScpeSEpUSEjPCQiMTl2Ry5hIykqKVEhIzwkIjEsMmJvQCcpKSpRISM8JCIxKilRIlEkKikqeSFSISM8JCIxeHEyKnBOcCJSISM8JCIxbC1Na0MoZiNSISM8JCIxYU1nSCM0XSRSISM8JCIxVG0nWypmL1dSISM8JCIxSClILHcjM2BSISM8JCIxOElSRCY+QCdSISM8JCIxLGlsIUhjNihSISM8JCIyJilRPmYwJD4hKVIhIz0kIjJsZCM9QClIIyopUiEjPSQiMlh3WGtlbSMpKlIhIz0kIjJEJiozPE4udCslISM9JCIyMDlzcDZTaiwlISM9JCIxQ2BCIylvUERTISM8JCIxNyYpXFpPVE1TISM8JCIvPHc3L1hWUyEjOiQiMSkpWy15cltfUyEjPCQiMmMyKUdWUl9oUyEjPSQiMk9FXiYzMmNxUyEjPSQiMjtYOVFaKGZ6UyEjPSQiMU53MlJVaikzJSEjPCQiMUIzTS81big0JSEjPCQiMCwvJ3B4cTFUISM7JCIyJio+bltgV2Q2JSEjPSQiMnZRSSxJInlDVCEjPSQiMmJkJFJsIT1ROCUhIz0kIjFqbmxJWyZHOSUhIzwkIjFZKj5mZiIqPTolISM8JCIxTUo9aCRHNDslISM8JCIxQWpXRV4nKnBUISM8JCIyMV40PCo9K3pUISM9JCIyJylwc3BsUSEpPSUhIz0kIjJtKWVCQWEyKD4lISM9JCIxdSEqXCg9N2g/JSEjPCQiMWRBd18qW15AJSEjPCQiMVhhLT1kPUNVISM8JCIxTCcpRyRbQUtCJSEjPCQiMi8jPWJbI2ZBQyUhIz0kIjE0XSJRLCdIXlUhIzwkIjEoPnkhekZMZ1UhIzwkIjJXUVRWYXAkcFUhIz0kIjFvWGc0alN5VSEjPCQiMWN4J1syVnVHJSEjPCQiMVc0OFMpemtIJSEjPCQiMjs4JVIwbV4wViEjPSQiMEtkMVBgWEolISM7JCIxMzAjZjghZkJWISM8JCIxJ3AkPSxwaUtWISM8JCIyTylvV21PbVRWISM9JCIydTE1PFYrMk4lISM9JCIyYUR0cD5QKGZWISM9JCIyTVdPQSdSeG9WISM9JCIxSicqXEYyInlQJSEjPCQiMiU+R3cjXFpvUSUhIz0kIjJ1K0UhZVUpZVIlISM9JCIxJj4qR0I1I1xTJSEjPCQiMXlCYil5ZFJUJSEjPCQiMm1jOlFiJSpIVSUhIz0kIjJZdnkhPjguS1chIz0kIjJFJT5NJTNvNVclISM9JCIyMTgwJ1xbNV1XISM9JCIyJz0kb1toVCJmVyEjPSQiMTE6OCFReSJvVyEjPCQiMSpvJVJYXkB4VyEjPCQiMXh5bDU+RCdbJSEjPCQiMmsxQGZuKUcmXCUhIz0kIjFhVT1UYUsvWCEjPCQiMVV1VzFBTzhYISM8JCIwajU8KCopUkFYISM7JCIxPVEocHROOWAlISM8JCIuUEFdcy9hJSEjOSQiMSk9K3ZFNCZcWCEjPCQiMXhMd0tnYWVYISM8JCIxa2wtKXojZW5YISM8JCIxYCgqR2omPm1kJSEjPCQiMVRIYkdqbCZlJSEjPCQiMUhoIlE0JHAlZiUhIzwkIjE2JHohZilIUGclISM8JCIxKlxVVmltRmglISM8JCIxKG8wJypRLj1pJSEjPCQiMXcpb1s6UzNqJSEjPCQiMWo/OD9wKClSWSEjPCQiMV5fUiZvOCpbWSEjPCQiMVQlZTFYXXpsJSEjPCQiMUI7I2ZAKClwbSUhIzwkIjIwIls9IilSLXdZISM9JCIyJikqeldZMjEmbyUhIz0kIjEoPTY8Xig0JXAlISM8JCIyWFB1cEZNSnElISM9JCIyRGNQQS9yQHIlISM9JCIyMHYrdiF5P0BaISM9JCIxTVJ3c1hDSVohIzwkIjI7N0YhUThHUlohIz0kIjInNC5ILiI9JFtaISM9JCIyd1xgJm9bTmRaISM9JCIyY287UWoiUm1aISM9JCIyTygpeiEqUkdheCUhIz0kIjI7MVZWO2xXeSUhIz0kIjFYaWdIPl0keiUhIzwkIjJOVnBbcFFEIVshIz0kIjI6aUssWXY6IlshIz0kIjE0ZVJEQWg/WyEjPCQiMnYqKmUxKipbJ0hbISM9JCIxJj1BZnYmb1FbISM8JCIxdGA9QERzWlshIzwkIjFoJltrR2ZuJlshIzwkIjJZdTY8MCd6bFshIz0kIjJFJFwocCJHJFsoWyEjPSQiMjE3UUFlcFEpWyEjPSQiMiczOF1aaiFIKlshIz0kIjEnXGtGNlY+IVwhIzwkIjElb0YheSl6NCJcISM8JCIxczNIVm0sP1whIzwkIjFiU2IzTTBIXCEjPCQiMVZzIlE8ITRRXCEjPCQiMUovM1JwN1pcISM8JCIxPk9NL1A7Y1whIzwkIjEzb2dwLz9sXCEjPCQiMScqKnBbQlBVKFwhIzwkIjEkPUwsK3VLKVwhIzwkIjFtalJsMkojKlwhIzwkIjFhJmYxYFo4KyYhIzwkIjJ1dEFmSCVRNV0hIz03YGpsJCIxMzQnUiopelckZSEjPSQiMSd6X1UqNHJSZiEjPSQiMSZvV1g0VVwvJyEjPSQiMXRsJFs+dCw6JyEjPSQiMS4lR15IL2FEJyEjPSQiMSNIP2FSTjFPJyEjPSQiMD03ZFxtZVknISM8JCIxcFMrJ2YoNHJsISM9JCIxYmZIJ3BHam4nISM9JCIxV3llJ3pmOnknISM9JCIxTCh6byozeicpbyEjPSQiMjppcnIqPi0jKnAhIz4kIjFgTVkoNGBzNCghIz0kIjFUYHYoPiVbLXMhIz0kIjFIcy8pSDp4SSghIz0kIjE8IlIkKVJZSFQoISM9JCIxMDVqKVx4Ij12ISM9JCIxJSpHIyopZjNNaSghIz0kIjEkeTkjKnBSJ0d4ISM9JCIxOG1dKnpxUSR5ISM9JCIxLSYpeioqPTVSeiEjPSQiMSlRITQrSUxXISkhIz0kIjF4QVErVGNcIikhIz0kIjFsVG4rX3phIykhIz0kIjFhZyc0SUUrTykhIz0kIjFVekQsdURsJSkhIz0kIjF0KFw6XSlbcSYpISM9JCIwbVQ9Zz5kbikhIzwkIjBiTEBxXTR5KSEjPCQiMVJhVS09PScpKSkhIz0kIjFGdHItSFQiKiopISM9JCIxOiM0SStXbTQqISM9JCIxLzZJLl4oPT8qISM9JCIxTEhmLmk1MiQqISM9JCIxQVspUUlQQlQqISM9JCIwcndUU292XiohIzwkIjEpZm9XXSp6QScqISM9JCIxKFtnWmdJIUcoKiEjPSQiMXZCMDA8RUwpKiEjPSQiMWtVTTBHXFEqKiEjPSQiMiQ0T2MhUnNWKyIhIz0kIjIiKXojZitiKlssIiEjPSQiMnMpPmk1Jz1hLSIhIz0kIjJlPF4xc1RmLiIhIz0kIjJaTyFvSVtZWTUhIz0kIjJOYjQyJXopcDAiISM9JCIyQ3VRMjA2djEiISM9JCIyYiN6d2dULnk1ISM9JCIyVjYoenFzYikzIiEjPSQiMktJRTNRITMqNCIhIz0kIjI9XGIzXC4nNDYhIz0kIjIybyUpM2dFLDciISM9JCIyJnBRIjRyXDE4IiEjPSQiMiZlSSU0I0c8VDYhIz0kIjI4Q3M0JGZwXjYhIz0kIjIsViw1Lz5BOyIhIz0kIjE+MS5eQHVzNiEjPCQiMnkhKWY1RWxLPSIhIz0kIjJvKiopM3IkKXkkPiIhIz0kIjJkPT02WzZWPyIhIz0kIjJYUFo2Zk1bQCIhIz0kIjJ0Ync2cWRgQSIhIz0kIjJsdTA3IjMpZUIiISM9JCIyYCRcQkBSU1k3ISM9JCIyVDdrNy5GcEQiISM9JCIyR0okSFQsWG43ISM9JCIyPV1BOER0ekYiISM9JCIyMHBeOE8nXClHIiEjPSQiMk8oM1FyJT4hKkgiISM9JCIyRDE1OWVVJjQ4ISM9JCIyNkRSOXBsK0siISM9JCIyLFdvOSEpKWVJOCEjPSQiMilHd1w2PjZUOCEjPSQiMnkib19AXWpeOCEjPSQiMm8rYzo4ZUBPIiEjPSQiMicqPSZlVDdvczghIz0kIjIkeVZoXlY/JFEiISM9JCIydGNWO1lGUFIiISM9JCIyaHZzO2RdVVMiISM9JCIyXiU+cSJvdFpUIiEjPSQiMlE4Sjx6J0hEOSEjPSQiMkdLZzwhKj5lViIhIz0kIjI2Xip5NklNWTkhIz0kIjJZcD09N21vWCIhIz0kIjJPKXklPUIqUW45ISM9JCIyQjJ4PU03eloiISM9JCIyNkUxPlhOJSlbIiEjPSQiMFhOPmNlKilcIiEjOyQiMidRWSc+biJbNDohIz0kIjJ2I1EqPnkvK18iISM9JCIyMSxCPyp5X0k6ISM9JCIyJCo+Xz8rXjVhIiEjPSQiMiQpUSIzN1RkXjohIz0kIjF4MDZBczRpOiEjPCQiMW0oUkBMP0VkIiEjPCQiMlkmKm9AV1ZKZSIhIz0kIjJPOSk+X2xtJGYiISM9JCIyb0tGQW0qPS87ISM9JCIyYV5jQXg3WmgiISM9JCIyV3EmRyMpZUJEOyEjPSQiMSQqW0ojKiplZGoiISM8JCIxIzNXQjUjR1k7ISM8JCIyM0Z0QkAwb2wiISM9JCIyJmZDU0EkR3RtIiEjPSQiMkVrSkNWXnluIiEjPSQiMjskM1lVWFApbyIhIz0kIjAtIVxfdyopKXAiISM7JCIxNCM+RHc/JTQ8ISM8JCIyd1JbRChRJSo+PCEjPSQiMShleEQpcFlJPCEjPCQiMmN4MUU0ISo0dSIhIz0kIjIoZWZqLUteXjwhIz0kIjJ1OWxFSk8/dyIhIz0kIjFPVnBBJWZEeCIhIzwkIjJhX0JGYCMzJHkiISM9JCIxOUZ2VWNnJHoiISM8JCIxLj55XyhHVCE9ISM8JCIyPTQ2Ryc9bDk9ISM9JCIxdi0lRyhcPEQ9ISM8JCIyT1lwRzMpcE49ISM9JCIyRWwpKkc+QGklPSEjPSQiMjcleSNISVduJj0hIz0kIjAuZEhUbnMnPSEjOyQiMT5pKUhfIXp4PSEjPCQiMndTOklqOCQpKT0hIz0kIjJtZldJdU8pKSo9ISM9JCIyJXpQMmApZiQ0PiEjPSQiMihvSDVqSCkpPj4hIz0kIjFkQDh0Z1NJPiEjPCQiMmtNaEo9SDQlPiEjPSQiMlpgIT4kSF85Jj4hIz0kIjJRcz5LU3Y+Jz4hIz0kIjJDIipbS14pXHM+ISM9JCIxJzR5S2lASSk+ISM8JCIyWUcyTHRXTio+ISM9JCIyT1pPTCV5MS8/ISM9JCIyQW1sTCY0Zjk/ISM9JCIyOCZbUmpTNkQ/ISM9JCIwL0NNPFBjLiMhIzskIjFIS1gkR2doLyMhIzwkIjI8VCNbJFIkb2M/ISM9JCIyL2c2Tl0xczEjISM9JCIxKnlTTmhIeDIjISM8JCIxeSpwTnNfIykzIyEjPCQiMW4iKmZMZXgpNCMhIzwkIjJhTkdPJSopSDRAISM9JCIyW2FkTzBBKT5AISM9JCIxR25val5NSUAhIzwkIjJsImZydCNvMzkjISM9JCIyXzVYUFEiUl5AISM9JCIyVUh1UFw5PjsjISM9JCIxJFsuUWdQQzwjISM8JCIxc0UkUXJnSD0jISM8JCIyOCc9J1EjUVskPiMhIz0kIjFXNSpRJHArL0EhIzwkIjJDQj9SL0lYQCMhIz0kIjI8VVxSOmBdQSMhIz0kIjBoeVJFd2JCIyEjOyQiMSp6MlNQKjRZQSEjPCQiMSkpcC4lW0FtRCMhIzwkIjJuPG1TZlhyRSMhIz0kIjImZmA0Lyhvd0YjISM9JCIyJltYNzk9PilHIyEjPSQiMVFQOkNccilIIyEjPCQiMmkjSD1NIVEjNEIhIz0kIjJjNjdVOWgoPkIhIz0kIjEvOENhVUdJQiEjPCQiMktccVVPMjNNIyEjPSQiMXcnKkh1L0xeQiEjPCQiMlonKUdWZWA9TyMhIz0kIjJQMGVWcHdCUCMhIz0kIjJDQyhRLykqKkdRIyEjPSQiMjlWO1ciSFUkUiMhIz0kIjBpWFctWVJTIyEjOyQiMTRbWk0icFdUIyEjPCQiMSMqUl1XQSpcVSMhIzwkIjIwPUxYTjpiViMhIz0kIjImcEJjayVRZ1cjISM9JCIyI2U6ZnU6Y2NDISM9JCIyc3U/WW8lM25DISM9JCIyaSQqXFl6MndaIyEjPSQiMUQielkhNDgpWyMhIzwkIjE5JDNaLGEnKVwjISM8JCIyblxQWjd4IjREISM9JCIxJ29tWkIrKD5EISM8JCIyVihleldMQUlEISM9JCIyTTFEW1hZMmEjISM9JCIyPERhW2NwN2IjISM9JCIyMlckKVtuI3poRCEjPSQiMi9qN1x5OkJkIyEjPSQiMTg9JVwqKVFHZSMhIzwkIjI6K3JcK2lMZiMhIz0kIjIwPitdNiYpUWcjISM9JCIyJnokSF1BM1doIyEjPSQiMiZvJmVdTEpcaSMhIz0kIjFkeDNYV1hORSEjPCQiMVlwNmJ2KGZrIyEjPCQiMidHaDlsMV1jRSEjPSQiMT1gPHZQLW5FISM8JCIxMlg/JilvYXhFISM8JCIxJnBMXyoqcCEpbyMhIzwkIjJWKUdFMEpmKXAjISM9JCIyRjIjSDppNjRGISM9JCIyQ0VAYEtSJz5GISM9JCIxWC9OTkM7SUYhIzwkIjJOanpgYSZvU0YhIz0kIjJEIykzYWwzN3YjISM9JCIyOixRYXdKPHcjISM9JCIyMD9uYShbRHNGISM9JCIxKlEnXCYpengjeSMhIzwkIjImeWJfJjQsTHojISM9JCIyOHdhYj9DUSFHISM9JCIwJlJlOnRNOUchIzskIjInUUpoRC8oWyNHISM9JCIxRkJrTk5STkchIzwkIjJqXnJjaztmJUchIz0kIjJgcStkdlJrJkchIz0kIjElKilIZCdHJ3AnRyEjPCQiMm8yZmQoZlt4RyEjPSQiMmFFKXkmMzQhKSlHISM9JCIxYnUiZT5LJikqRyEjPCQiMk5rWWVJYiE0SCEjPSQiMkQkZShlVHkmPkghIz0kIjIzLTBmXywsJEghIz0kIjIwQE1makMxJUghIz0kIjEqUmpmdVo2JkghIzwkIjI7ZSMqZiYzbmhIISM9JCIyMXhAZydSPnNIISM9JCIyJ2Y0MHdxciMpSCEjPSQiMidbLDMnPVNLKkghIz0kIjFQJDRoSGpQKyQhIzwkIjJqX1FoUydHOUkhIz0kIjE6eDs7JjRbLSQhIzwkIjJ5Km8+RUVMTkkhIz0kIjJvM0VpdGJlLyQhIz0kIjJhRmJpJSl5ajAkISM9JCIyWFklR2M+IXAxJCEjPSQiMk5sOGoxRHUyJCEjPSQiMj0lR013Ilt6MyQhIz0kIjIzLnNqR3IlKTQkISM9JCIyT0Asa1IlKiozSiEjPSQiMkxTSWtdPCY+SiEjPSQiMjtmZmtoUys4JCEjPSQiMjF5KVtFUGNTSiEjPSQiMXB6Xk9vM15KISM8JCIxZnJhWSo0OzskISM8JCIxW2pkY0k4c0ohIzwkIjIvYDBtO2NFPSQhIz0kIjE+Wmp3I3pKPiQhIzwkIjEzUm0nUS1QPyQhIzwkIjEoNCRwJ1xEVUAkISM8JCIxJ0dBbmdbWkEkISM8JCIxdTl2OzxGTkshIzwkIjFqMXlFW3pYSyEjPCQiMVkpNG8kekpjSyEjPCQiMmMuUm8vVG9FJCEjPSQiMUMjb286a3RGJCEjPCQiMTh1Km9FKCl5RyQhIzwkIjEtbSNwUDUlKUgkISM8JCIxInpicFtMKjNMISM8JCIxelwpcGZjJT5MISM8JCIxaVQsMih6KkhMISM8JCIxXkwvPEddU0whIzwkIjBhc3EjZi1eTCEjOyQiMiVHPDVQIVw6TyQhIz0kIjJ1IjQ4WkAyc0whIz0kIjJsNWdyRCZmI1EkISM9JCIyYkgqPW4kPUpSJCEjPSQiMXklPXNaVE9TJCEjPCQiMm1tWnNla1RUJCEjPSQiMmMmb0YocChvQ00hIz0kIjJZLzF0ITNATk0hIz0kIjJPQk50IlJ0WE0hIz0kIjFBV09GcURjTSEjPCQiMTZPUlAseW1NISM8JCIxJXpBdUMudFokISM8JCIyTSk+WGRqI3lbJCEjPSQiMXM2W24lXCQpXCQhIzwkIjBPNXZkcykzTiEjOyQiMGJSdm8mUj5OISM7JCIxUShvdno9KkhOISM8JCIxRnpmMj5XU04hIzwkIjE7cmk8XSc0YiQhIzwkIjEqSGN3NylbaE4hIzwkIjEpWyZvUDcsc04hIzwkIjF4WXJaVmAjZSQhIzwkIjFsUXVkdTAkZiQhIzwkIjFhSXhuMGUuTyEjPCQiMVdBIXluLlRoJCEjPCQiMUs5JHl5RVlpJCEjPCQiMToxJ3kqKVxeaiQhIzwkIjEvKSopeSt0Y2skISM8JCIyQyoqPXo2Jz5jTyEjPSQiMSM9W3pBPm5tJCEjPCQiMXJ0KHpMVXNuJCEjPCQiMiVmbCtbYXcobyQhIz0kIjFbZC5lJilHKXAkISM8JCIxSlwxbzsiKTNQISM8JCIwNyU0eVpMPlAhIzskIjE0TDcpKXkmKUhQISM8JCIyd1xfIikqNFFTUCEjPSQiMm1vIj0zVCE0diQhIz0kIjJjKDNAPXNVaFAhIz0kIjFrK0NHLiY+eCQhIzwkIjFaI3AjUU1aI3kkISM8JCIya1YpSFtsKkh6JCEjPSQiMUR3S2UnPk4hUSEjPCQiMTlvTm9GLzlRISM8JCIxLmdReWVjQ1EhIzwkIjEjPjolKSkqKTNOUSEjPCQiMFFXJSk0N2MlUSEjOyQiMWpOWjNfOGNRISM8JCIxX0ZdPSRlbSdRISM8JCIxVD5gRzk9eFEhIzwkIjA4aCZRWHEoKVEhIzskIjE9LmZbd0EpKlEhIzwkIjEyJj4nZTJ2M1IhIzwkIjEncFsnb1FGPlIhIzwkIjF6eW55cHpIUiEjPCQiMW9xcSkzPy4lUiEjPCQiMWRpdCk+VjMmUiEjPCQiMVlhdzNqT2hSISM8JCIyV2olej0lKik9KFIhIz0kIjFDUSMpR0RUIylSISM8JCIyQyxgKVFjJEgqUiEjPSQiMSxBKSlbKGVNKyUhIzwkIjElUTYqZT0pUiwlISM8JCIyRGRTKm9cXUNTISM9JCIxaShwKnkhR10uJSEjPCQiMjAmKikqKik9XmIvJSEjPSQiMiZSIkchKkh1ZzAlISM9JCIxSHQwNHVmbVMhIzwkIjJ3XiczPjA3eFMhIz0kIjEsZDZIT2soMyUhIzwkIjEqKVs5Um47KTQlISM8JCIyJXlTPFwpKm8zVCEjPSQiMnVFLiNmSEA+VCEjPSQiMWNDQnBndEhUISM8JCIxVztFeiJmLTklISM8JCIxTDNIKkcjeV1UISM8JCIybCw/JCpSMDg7JSEjPSQiMmI/XCQ0Jkc9PCUhIz0kIjElUnkkPjtOIz0lISM8JCIxJGUyJUhaKEc+JSEjPCQiMXJuVlJ5Ui5VISM8JCIwJ2ZZXDQjUkAlISM7JCIwOiZcZlNXQ1UhIzskIjFMVl9wcidcQiUhIzwkIjFATmJ6LVxYVSEjPCQiMTRGZSpROGdEJSEjPCQiMSoqPWgqXE9sRSUhIzwkIjEpM1QnNCdmcUYlISM8JCIyakZxJz5GZShHJSEjPSQiMWwlKnBIZTUpSCUhIzwkIjFcJ0coUipHJzNWISM8JCIxUHl2XD86PlYhIzwkIjFFcXlmXm5IViEjPCQiMlhAOylwIyk+U1YhIz0kIjEvYSUpejhzXVYhIzwkIjJEZnUpKltXN08lISM9JCIyOnkuKipmbjxQJSEjPSQiMWtIJCo0MkgjUSUhIzwkIjFhQCcqPlEiR1IlISM8JCIxVTgqKkhwTC5XISM8JCIyMWA/Ky9nUVQlISM9JCIxQChcKzokUUNXISM8JCIyJTQqeStFMVxWJSEjPSQiMSk0MyxQSGFXJSEjPCQiMjBHUCxbX2ZYJSEjPSQiMiZwazshZnZrWSUhIz0kIjImZWM+KygpKnBaJSEjPSQiMnYlW0E1PV8oWyUhIz0kIjFPU0Q/XC8pXCUhIzwkIjFES0dJIW8mM1ghIzwkIjE5Q0pTNjQ+WCEjPCQiMm1mVC5EOSdIWCEjPSQiMmN5cS5PUCxhJSEjPSQiMXUqKlJxL21dWCEjPCQiMWoiSC9lJD1oWCEjPCQiMV8kZS9wMTxkJSEjPCQiMVR2WyspSEFlJSEjPCQiMUhuXjVIdiNmJSEjPCQiMT1mYT9nRi5ZISM8JCIxLF5kSSIqejhZISM8JCIwSC8xQ0FWaSUhIzskIjF6TWpdYCVbaiUhIzwkIjJ2bWkxWW9gayUhIz0kIjFjPXBxOiplbCUhIzwkIjJiL0AybzlrbSUhIz0kIjJYQl0yelBwbiUhIz0kIjE8JXoyITRZKG8lISM8JCIyY2czMywlKXpwJSEjPSQiMSZ6UDM3MiYzWiEjPCQiMSUpcCczQkkhPlohIzwkIjJFPCcqM01gJkhaISM9JCIxaGAjNFh3K3UlISM8JCIxXlgmNGMqZl1aISM8JCIyTXQkKTRuQTZ3JSEjPSQiMkMjSCwieVg7eCUhIz0kIjE2QC8iKilvQHklISM8JCIyMElyNSsjcCN6JSEjPSQiMSpbKzY2OkshWyEjPCQiMXgnSDZBUVAiWyEjPCQiMnYnKWU2TGhVI1shIz0kIjAwKT1UV3lNWyEjOyQiMidRc0BedklYWyEjPSQiMUZrQ2gxJGUmWyEjPCQiMTtjRnJQTm1bISM8JCIyYyFbSSIpbyhvKFshIz0kIjElKlJMIioqKlIoKVshIzwkIjEjPWo4NUJ6KlshIzwkIjFtQlI2aVczXCEjPCQiMWE6VUAkcCo9XCEjPCQiMVcyWEpDXEhcISM8JCIxSyp6OWE6KyVcISM8JCIxQCI0OmxRMCZcISM8JCIyJTQkUTp3aDUnXCEjPSQiMiYpXG46KFtlclwhIz0kIjEibydmIil6NSMpXCEjPCQiMXJlaSI0SkUqXCEjPCQiMWZdbCxVOi5dISM8JCIyd0MlbzZ0bjhdISM9JCIxUU1yQC8/Q10hIzwkIjFFRXVKTnNNXSEjPCQiMTk9eFRtQ1hdISM8JCIxLjUhPXZwZDAmISM8JCIyaz1JPSdHSG1dISM9JCIxdyRmPShmIm8yJiEjPCQiMldjKSk9M1J0MyYhIz0kIjFgeCI+Pml5NCYhIzwkIjJEJXAlPkkmUTNeISM9JCIxSmgoPlQzKj1eISM8JCIxPmArQTpWSF4hIzwkIjEtWC5LWSYqUl4hIzwkIjI7cGo/dXgvOiYhIz0kIjApRzRfMytoXiEjOyQiMidwPzdpUl9yXiEjPSQiMWY3OnNxLyM9JiEjPCQiMndXIT0jPXFEPiYhIz0kIjJZajRBSCQ0Ll8hIz0kIjE+KVFBUztPQCYhIzwkIjEyIW9BXlJUQSYhIzwkIjEoPihIQUVtTV8hIzwkIjEmUUVCdCY9WF8hIzwkIjJNZGJCJSkzZEQmISM9JCIxalpRXz5CbV8hIzwkIjFfUlRpXXZ3XyEjPCQiMU5KV3MieXNHJiEjPCQiMUNCWiNHLHlIJiEjPCQiMTc6XSNSQyQzYCEjPCQiMSwyYC12JSk9YCEjPCQiMCopZkRocSRIYCEjOyQiMXohKmVBUCopUmAhIzwkIjJ3RT1FJG9UXWAhIz0kIjIvWFpFJSpSNE8mISM9JCIwa3dFMGo5UCYhIzskIjIlR2VxaWgpPlEmISM9JCIxPF10cyM0RFImISM8JCIxMVV3I1FLSVMmISM8JCIxJlIkeiNcYk5UJiEjPCQiMldlQUdneVNVJiEjPSQiMW48JkdyLFlWJiEjPCQiMmImNClHI1s3WGEhIz0kIjFXLCJIJHprYmEhIzwkIjJPTFJIL3JoWSYhIz0kIjFBJm9IOiVwd2EhIzwkIjByKCpIRTxzWyYhIzskIjImKSpvLXQudShcJiEjPSQiMSQzY0lbaiMzYiEjPCQiMkNGJjMkZid5PWIhIz0kIjFoVzYuKDQkSGIhIzwkIjFcTzk4RyQpUmIhIzwkIjFSRzxCZk5dYiEjPCQiMUY/P0whejNjJiEjPCQiMmFASks5LTlkJiEjPSQiMSlSZ0tERD5lJiEjPCQiMSllKkdqJFtDZiYhIzwkIjF3KD1MWnJIZyYhIzwkIjFtek0kZSVcOGMhIzwkIjFiclAkcDxTaSYhIzwkIjFXalMuM2FNYyEjPCQiMUtiVjhSMVhjISM8JCIyMXNrTS0oZWJjISM9JCIxLlJcTCw2bWMhIzwkIjEkNEJOQ0xtbiYhIzwkIjI5R19OTmNybyYhIz0kIjBaImVqJXp3cCYhIzskIjIlZjFodEQ/M2QhIz0kIjIlWylST29EKD1kISM9JCIxUCFwT3pbI0hkISM8JCIwQSlwLj54UmQhIzskIjImM3VzOF1IXWQhIz0kIjEoZmNQNz0zdyYhIzwkIjJseSZ5TDdNcmQhIz0kIjJiKFwiUU1rPXkmISM9JCIxa1QlUVgoUSN6JiEjPCQiMV9MKFFjNUghZSEjPCQiMU9EIVJuTE0iZSEjPCQiMUU8JFJ5Y1IjZSEjPCQiMTQ0J1IqKXpXJGUhIzw3YGpsJCIxXEBYKik0ej9rISM9JCIxOTgnKlFvZk9sISM9JCIxIltxJSlvLUNsJyEjPSQiMmxrenpgMyNvbiEjPiQiMiZbKClbKFE5UylvISM+JCIxOXoqcEI/KSoqcCEjPSQiMDMybDNFYzYoISM8JCIxWmksTz5WSnMhIz0kIjJEVERieVBzTSghIz4kIjF5WC5OTy9qdSEjPSQiMVhQYSVbXCl5diEjPSQiMCJIME1gbCVwKCEjPCQiMTk/YyQ9aC8ieSEjPSQiMD1ySS5uaSN6ISM8JCIxWC5lIylHMlUhKSEjPSQiMTgmKjNLKHl5OikhIz0kIjF4JylmImUlb3QjKSEjPSQiMVZ5NUovXCpRKSEjPSQiMCw8MUcnSDAmKSEjPCQiMTdoN0lANUAnKSEjPSQiMXlfanp6IXB0KSEjPSQiMVdXOUhRcl8pKSEjPSQiMGhgJ3knPiZvKikhIzwkIjF2RjtHYkslMyohIz0kIjFWPm54ODgrIyohIz0kIjE0Nj1GcyRmSiohIz0kIjE0LXB3SXVKJSohIz0kIjF2JCo+RSpbdmEqISM9JCIxViYzZHhhTG0qISM9JCIxM3hARDE7eigqISM9JCIxdW9zdWsnXCopKiEjPSQiMlVnQkNCeDUrIiEjPSQiMjNfdXQieWw3NSEjPSQiMjNWREJTUVUtIiEjPSQiMnZNd3MpKj1lLiIhIz0kIjFrc0FzJipSWjUhIzwkIjIwPXlyOiEpKmU1ISM9JCIydDRIQHVnMDIiISM9JCIxOSszRjg5IzMiISM8JCIyMiQ0Ljc+cyQ0IiEjPSQiMjElPSlwXC1gNSIhIz0kIjJzdks+MyQpbzYiISM9JCIyVW4kKW9taiVHNiEjPSQiMjFmTT1EVys5IiEjPSQiMTJieU9baV42ISM8JCIyUFVPPFUwSzsiISM9JCIyLk0obzFneXU2ISM9JCIyMkRRO2Ztaj0iISM9JCIycjsqZXdyJXo+IiEjPSQiMlEzUzp3RiY0NyEjPSQiMi8rIlxZJDM2QSIhIz0kIjE8PldKKilvSzchIzwkIjJPJEdSOyZwVUMiISM9JCIyLnZWODVdZUQiISM9JCIyMG0lSCdvSXVFIiEjPSQiMXhiQ3I3LHo3ISM8JCIyTlwnPmM9ZiFIIiEjPSQiMixUWjZXc0BJIiEjPSQiMUYkKTRFSXY4OCEjPCQiMk9DXDVoTGBLIiEjPSQiMi07K2c+OXBMIiEjPSQiMi0yXjR5JVxbOCEjPSQiMSgpPiFmT3YrTyIhIzwkIjJPIUgmMyZmbHI4ISM9JCIwI1EhZWBPS1EiISM7JCIxUFp2P3IiW1IiISM8JCIyTGwwZHEoUjE5ISM9JCIyKXBsbCFIeXpUIiEjPSQiMixbMmMoKWUmSDkhIz0kIjJvUmUwWVI2VyIhIz0kIjJLSjRiLz9GWCIhIz0kIjIpSC1ZSTFJazkhIz0kIjJsOTZhQCIpZVoiISM9JCIyTzFpLiE9WShbIiEjPSQiMip6SEomUVUhKlwiISM9JCIyKiopUUVxSGk1OiEjPSQiMm4hW0BiTj9BOiEjPSQiMkxzbCw5JXlMOiEjPSQiMilSbTZEWk9YOiEjPSQiMmtibitKWHBiIiEjPSQiMk1aPV0qZV9vOiEjPSQiMikqUXAqems1IWUiISM9JCIyaUk/XDEobyJmIiEjPSQiMm9Acilcd0UuOyEjPSQiMks4QVtCW1toIiEjPSQiMihcSXg+KUdraSIhIz0kIjJsJ1JzLyU0IVE7ISM9JCIxJClbbiopKiplXDshIzwkIjIlKnpEWWRxNm0iISM9JCIyaXJ3JmY2dnM7ISM9JCIya2lGWHVKVm8iISM9JCIxViZ5JUhCImZwIiEjPCQiMidmJUhXIkhcMjwhIz0kIjF3LlEqXHQhPjwhIzwkIjEkSEpWM2ExdCIhIzwkIjIkNEFHcFlCVTwhIz0kIjFFSkJhXyJRdiIhIzwkIjFPUz1SZVJsPCEjPCQiMkcmXDhDayhweCIhIz0kIjIncGUzNHFiKXkiISM9JCIxJ3lPU2ZQLCE9ISM8JCIyR3EoKSp5Ij08Ij0hIz0kIjIjPidRUncpSEI9ISM9JCIxTyYqKSlbJHpbJD0hIzwkIjJpV1NRJCpmayU9ISM9JCIyRk8iej0wL2U9ISM9JCIyJnpBdS42aXA9ISM9JCIxJz4kcClvLDcpPSEjPCQiMkY2V09GI3kjKj0hIz0kIjFIXWZlR08vPiEjPCQiMVlmYVZNJWYiPiEjPCQiMmUmb1xHU19GPiEjPSQiMkV4Wk1oLyJSPiEjPSQiMSpvKVIpPiZvXT4hIzwkIjExJ1xMeWxBJz4hIzwkIjJGXyskb2olUSg+ISM9JCIxUjlEYHBVJik+ISM8JCIyYk4tI1F2KygqPiEjPSQiMW1LOkIiKWUzPyEjPCQiMkE9LyIzKG8sLSMhIz0kIjEqNGJJSFw8LiMhIzwkIjJhLDEheSlITC8jISM9JCIxS3AmSFk1XDAjISM8JCIxXHkhei8iXG0/ISM8JCIyZXdlR2pyIXk/ISM9JCIyQm80eUBfJyozIyEjPSQiMkRmZ0YhR0IsQCEjPSQiMiQ0OnIoUThHNiMhIz0kIjJhVWlFKFJSQ0AhIz0kIjFVTGhkWChmOCMhIzwkIjInZVVjVV5iWkAhIz0kIjJlPDp2c04iZkAhIz0kIjEjNG1DSjsyPCMhIzwkIjJDKzx1Km9IIz0jISM9JCIyJj16TyNbeFE+IyEjPSQiMmAkKT10MWVhPyMhIz0kIjI8dnBBbFFxQCMhIz0kIjImbzFBUCM+J0dBISM9JCIxJmVyQCMpKj5TQSEjPCQiMj1dQXJTIXleQSEjPSQiMTdNMiMqNE9qQSEjPCQiMiVHVi14OiVcRiMhIz0kIjJfQ3Y+O0FsRyMhIz0kIjI8O0VwdS0iKUgjISM9JCIyJnlxKD1MJG80QiEjPSQiMSYqeiNvIlJFQEIhIzwkIjI8Iip5PF1XR0wjISM9JCIxQSlIbjNEV00jISM8JCIyKFEyb3JjK2NCISM9JCIxYjtqY2llbkIhIzwkIjI7ZCNlVG87ekIhIz0kIjIlKVtMbFVaMlIjISM9JCIxMFdbNiFHQlMjISM8JCIyO0tOa2YzUlQjISM9JCIxS2lRIj0qW0RDISM8JCIyJFtyTG0ocHFWIyEjPSQiMWwhKUdeLmxbQyEjPCQiMjopKlFpJDRCZ0MhIz0kIjIkKSopKj1AOiI9WiMhIz0kIjJbIjM5MUBSJFsjISM9JCIyN3QiNCJwc1xcIyEjPSQiMj1rVWdGYGxdIyEjPSQiMiNlTio0J1E4PUQhIz0kIjF2VyVmVzkoSEQhIzwkIjI6UiYqMy4mSFREISM9JCIyJDNqJWVodkdiIyEjPSQiMldBKHoraVhrRCEjPSQiMVQiW2R5T2dkIyEjPCQiMjkwKnBxdGgoZSMhIz0kIjFvKlxjJno+KmYjISM8JCIyWSkzZ1MmeTJoIyEjPSQiMjkhPWJEImZCaSMhIz0kIjJ2ci0wclJSaiMhIz0kIjJZamBhSD9iayMhIz0kIjI5Yi8vKTM1ZEUhIz0kIjI4WWJgWSJvb0UhIz0kIjF5akldP0UhbyMhIzwkIjJYSGRfalU9cCMhIz0kIjIxQDMtQUJNcSMhIz0kIjJ5N2ZeIVErOkYhIz0kIjJZLzUsUiVlRUYhIz0kIjIyJzQxdlw7UUYhIz0kIjJ2KD0sZ2J1XEYhIz0kIjJ4eWlcOUU4dyMhIz0kIjJYcTgqSG4hSHgjISM9JCIxQFknW0ooWyV5IyEjPCQiMnhgOikqKnkxJ3ojISM9JCIyUVhtWltbdyFHISM9JCIyMVA8KHAhSCM+RyEjPSQiMnVHb1lsNDMkRyEjPSQiMnc+PidSLVJVRyEjPSQiMTksZEMzKFImRyEjPCQiMjcuQCY0OWJsRyEjPSQiMnclPlolKj44eEchIz0kIjJQJ0dVekRyKSlHISM9JCIxInl0VjskSCtIISM8JCIxKHBDJFxQKD0iSCEjPCQiMnNndlVMYU0jSCEjPSQiMUNsQT5cLk5IISM8JCIyOld4VF06bSVIISM9JCIyd05HIiozJz5lSCEjPSQiMldGelNudyhwSCEjPSQiMjM+SSFmc04iKUghIz0kIjEyNilSJXkkSCpIISM8JCIxPD8kKkclPVgrJCEjPCQiMU1IKVEsKjQ7SSEjPCQiMCZRJCkpZnp3LSQhIzskIjJ2dyV5JD1nI1JJISM9JCIxJW9OKG8yJTMwJCEjPCQiMjJnJ29gOFVpSSEjPSQiMTx2alE+K3VJISM8JCIxRiUpZUJEZSYzJCEjPCQiMk5NUiYzSjsoNCQhIz0kIjIuRSFcJHBWKDNKISM9JCIyazxUJXlVSz9KISM9JCIxJTQjUmpbIT44JCEjPCQiMTZJTVthW1ZKISM8JCIxRlJITGcxYkohIzwkIjFQW0M9bWttSiEjPCQiMWFkPi5zQXlKISM8JCIwblkiKXkyKSo9JCEjOyQiMSdlKDR0JClRLEshIzwkIjEvJlshZSpvSEAkISM8JCIwVSoqSGFcWEEkISM7JCIxUC4mejdJaEIkISM8JCIyTkQsSHI1eEMkISM9JCIxa0AmeUgiSGZLISM8JCIwMy5HKT0oM0YkISM7JCIxJypSdm5DWCNHJCEjPCQiMThccV9JLiVIJCEjPCQiMCRlbFBPaDBMISM7JCIybXUxRUElPjxMISM9JCIyTW1kdiFbeEdMISM9JCIxdCYzRFJiLk0kISM8JCIwXGZ1KGYkPk4kISM7JCIxMi9UaWxeakwhIzwkIjFCOE9acjR2TCEjPCQiMEM3QnR4bVEkISM7JCIybTpqc0plIylSJCEjPSQiMkwyOUEhKlEpNE0hIz0kIjEkKVw7KFs+OVUkISM8JCIvZjZzKytMTSEjOiQiMTtvMWQxZVdNISM8JCIxTHgsVTc7Y00hIzwkIjBsb3AjPXVuTSEjOyQiMmxjPj5UQSR6TSEjPSQiMSRbcW8qSCE0XCQhIzwkIjEkUkA9ZSRbLU4hIzwkIjE0QnhtVDE5TiEjPCQiMUVLc15aa0ROISM8JCIxVlRuT2BBUE4hIzwkIjInZl1pQGYhKVtOISM9JCIyayhmZDFsUWdOISM9JCIyRCpvXyI0bj5kJCEjPSQiMkMheVp3d2EkZSQhIz0kIjBzRzlFR15mJCEjOyQiMm5qemolKTNuZyQhIz0kIjFgMExKJSpHPU8hIzwkIjBaIkc7KygpSE8hIzskIjEnUUs3Z105ayQhIzwkIjJDSSQ9Jz1KSWwkISM9JCIxOFU4cjxoa08hIzwkIjA4JjNjQj53TyEjOyQiMVlnLlRIeChvJCEjPCQiMk0ncClmX2AkKnAkISM9JCIyJnp5JDQ2TTRyJCEjPSQiMmN6KSllcDlEcyQhIz0kIjE4KFIzRyY0TVAhIzwkIjFCMXpsZW5YUCEjPCQiMGFUMlhjc3YkISM7JCIxY0NwTnEkKW9QISM8JCIyRVBWMWk8L3kkISM9JCIxKkclZjAjKSo+eiQhIzwkIjExX2EhenlOIVEhIzwkIjFBaFx2JGZeIlEhIzwkIjFMcVdnKlJuI1EhIzwkIjFcelJYMEtRUSEjPCQiMW0pWy44LCpcUSEjPCQiMkR5Kkg6PFtoUSEjPSQiMSpwXS1JaUkoUSEjPCQiMmFoLF8pR2slKVEhIz0kIjFLRDpxTUEnKlEhIzwkIjFcTTViUyF5IVIhIzwkIjInZlYwU1lRPlIhIz0kIjF3XytEXyc0JFIhIzwkIjEjPmMqNGVhVVIhIzwkIjInM3IhXFJFVCZSISM9JCIyYS1lKXpwcWxSISM9JCIxViozW2MoR3hSISM8JCIxZilmKFwibykpKVIhIzwkIjFwMnJNKFsvKyUhIzwkIjEmb2gnPiRIPywlISM8JCIxLUVoLyo0Ty0lISM8JCIxPk5jKlshPk5TISM8JCIxT1dedTV4WVMhIzwkIjFfYFlmO05lUyEjPCQiMW9pVFdBJCpwUyEjPCQiMiV6ck9IR14iMyUhIz0kIjJiND1WVCQ0JDQlISM9JCIyOyxwIyoqUm4vVCEjPSQiMiVHKj5VZWFpNiUhIz0kIjFZMzxwXiR5NyUhIzwkIjFpPDdhZFRSVCEjPCQiMXlFMlJqKjQ6JSEjPCQiMSllQlMjcGRpVCEjPCQiMmJddSozdjp1VCEjPSQiMjtVRFI0UWQ9JSEjPSQiMVFqKCl5Jz10PiUhIzwkIjFjcyNRRSoqKTNVISM8JCIxcyJ5KFspei9BJSEjPCQiMSozSFBWZz9CJSEjPCQiMicpKip6Jz01a1ZVISM9JCIyYSI0ai47QWJVISM9JCIxSz1lKT0tb0UlISM8JCIxW0ZgdEZReVUhIzwkIjJXbSRbZUwnKipHJSEjPSQiMSNlTU0lUmEsViEjPCQiMSlcJlFHWDc4ViEjPCQiMiYza0w4XnFDViEjPSQiMllLKEcpcCZHT1YhIz0kIjI5Q1FLR215TSUhIz0kIjFlIio9b29XZlYhIzwkIjF1KzlgdS1yViEjPCQiMkQqNDRRITNFUSUhIz0kIjInMz4vQicpPSVSJSEjPSQiMURHKno/cGRTJSEjPCQiMU5QJUh6XHRUJSEjPCQiMjlsJSp5UEkqR1chIz0kIjFvYiVHJzReU1chIzwkIjElWyd6Wjo0X1chIzwkIjEsdXVLQG5qVyEjPCQiMT0kKXA8RkR2VyEjPCQiMllCXEVJTG9bJSEjPSQiMlg5K3cpUVQpXCUhIz0kIjIxMV5EWiUqKjRYISM9JCIxeT5dZF1kQFghIzwkIjElKkdYVWM6TFghIzwkIjE2UVNGaXRXWCEjPCQiMUZaTjdvSmNYISM8JCIxWGNJKFIoKnljJSEjPCQiMWJsRCMpelp6WCEjPCQiMXJ1P24mZTVmJSEjPCQiMShRZUA6UkVnJSEjPCQiMTAkNHJ0PlVoJSEjPCQiMjtBZz9LK2VpJSEjPSQiMVE2LDI0UVBZISM8JCIyWDBpPlxoKltZISM9JCIyVidIInAyVTBtJSEjPSQiMi8pUSc9bUFAbiUhIz0kIjEoejlvQy5QbyUhIzwkIjE6ZHdKUUcmcCUhIzwkIjFKbXI7VydvcSUhIzwkIjFadm0sXVc9WiEjPCQiMWolPW1lRCt0JSEjPCQiMXYkcDo8MTt1JSEjPCQiMSJIP2x2Jz1gWiEjPCQiMTM3WlR0d2taISM8JCIxQ0BVRXpNd1ohIzwkIjI6L3Q4Xkd6eSUhIz0kIjJ3JlJLJzQ0Jip6JSEjPSQiMXVbRiJvKjM2WyEjPCQiMSV5RGlFcUUjWyEjPCQiMSxuPF4zRE1bISM8JCIxPHc3TzkkZSVbISM8JCIxTSZ5NS03dSZbISM8JCIxXiVIZ2cjKipvWyEjPCQiMW4uKTQ+dDApWyEjPCQiMSRHSmZ4YEAqWyEjPCQiMk0+IykzT01QIVwhIz0kIjI7NkxlJVxKOlwhIz0kIjFHU3lJYipvI1whIzwkIjFXXHQ6aFpRXCEjPCQiMCdlbytuMF1cISM7JCIydXhPY0dQOydcISM9JCIyTnAoZXF5QHRcISM9JCIxLydRYlgpeiUpXCEjPCQiMF8qW1MhemoqXCEjOyQiMVEvV0QnZnorJiEjPCQiMWE4UjUtYT5dISM8JCIwRlVgej82LiYhIzskIjJuPSRIIVEsRi8mISM9JCIyTTVXXyc+R2FdISM9JCIwLSY+XUQnZTEmISM7JCIyJUhmOU5KV3hdISM9JCIyYiVvND9QLSozJiEjPSQiMld3Wl1JLzE1JiEjPSQiMjBvKSoqKilbPTdeISM9JCIybWZcXFpsUDcmISM9JCIxOTAhKmZnTU5eISM8JCIxSjkmW2tFcDkmISM8JCIwTS0pSHNdZV4hIzskIjFjS3Y5eTNxXiEjPCQiMk88LygqUm87PSYhIz0kIjIvNGJZKSpbSz4mISM9JCIybCsxJ3AmSFs/JiEjPSQiMkUjcGJhLFQ7XyEjPSQiMCV5XVIyKnpBJiEjOyQiMVwoZVdLciZSXyEjPCQiMW0nNCU0PjpeXyEjPCQiMSNlZ1ZcS0ZFJiEjPCQiLzpKeklKdV8hIzokIjE8Q0VrTyplRyYhIzwkIjFMTEBcVVooSCYhIzwkIjFeVTtNWzA0YCEjPCQiMDs6Ij5haj9gISM7JCIxeGcxL2dAS2AhIzwkIjEkKnAsKmUnelZgISM8JCIwInonUjx4YE4mISM7JCIyayMpPSpleCZwTyYhIz0kIjJEdXBRTVEmeWAhIz0kIjInZTEjKUcqPSxSJiEjPSQiMGRyUF4qcCxhISM7JCIxJ1tBKCk0IUc4YSEjPCQiMS1NbiRvZ1tVJiEjPCQiMT1WaW83V09hISM8JCIxUF9kYD0tW2EhIzwkIjFgaF9RQ2dmYSEjPCQiMXBxWkJJPXJhISM8JCIxenpVM093I1smISM8JCIybCopeUw+V1ZcJiEjPSQiMkUiKUgkeVojZl0mISM9JCIxSDJHamBdPGIhIzwkIjFZO0JbZjNIYiEjPCQiMWlEPUxsbVNiISM8JCIxek04PXJDX2IhIzwkIjEmUiUzLngjUWMmISM8JCIxMWAuKUczYWQmISM8JCIxQWkpSCgpKSlwZSYhIzwkIjFRciR6WHAmKWYmISM8JCIyYjApKUcvXSxoJiEjPSQiMXQqUXlpSTxpJiEjPCQiMSopKSp5NzdKTGMhIzwkIjExM3UoeiIqW2smISM8JCIya3IicCNRc2tsJiEjPSQiMkRqVXcnSDBvYyEjPSQiMidbTmZfTmp6YyEjPSQiMmFZV3Y4OTdwJiEjPSQiMSNRJlxBWnotZCEjPCQiMSpIWXVJdlZyJiEjPCQiMTpzUiMqZSZmcyYhIzwkIjJjN1t0Wk92dCYhIz0kIjFVISpIaXE2XGQhIzwkIjFmKlxzayhwZ2QhIzwkIjF3Mz9LI3lBeCYhIzwkIjEjel5yIillUXkmISM8JCIyJzRGNS0lUmF6JiEjPSQiMUVPMCgpKj5xIWUhIzwkIjFPWCtzMGc9ZSEjPCQiMkNYYnA6Ij1JZSEjPSQiMXBqIT51aDwlZSEjPCQiMSZHZG9LVUwmZSEjPCQiMS4jMz0iSCNcJ2UhIzwkIjE+ImZuXC5sKGUhIzwkIjFOK3IiMyUzKSllISM8JCIyYiU0bW1ZbSoqZSEjPSQiMWk9aF5fQzZmISM8JCIyJXlGY09lI0cjZiEjPSQiMSdwODpVMVckZiEjPCQiMTdZWTFxKWYlZiEjPCQiMUdiVCJmbnYmZiEjPCQiMmNXbWo8WyJwZiEjPSQiMWN0SmgoRzIpZiEjPCQiMXMjb2lNNEIqZiEjPCQiMSo9PjckKiopUSsnISM8JCIybDVxaF5xYSwnISM9JCIyRS1ANjVecS0nISM9JCIxUj4yJ29KJ1FnISM8JCIxYkctckFAXWchIzwkIjJhd3RmJkd6aGchIz0kIjEjb0M0V3RMMichIzwkIjEpZnZlLWFcMychIzwkIjJWXkUzaE1sNCchIz0kIjFLdXgmPjoiM2ghIzwkIjFbJEcyeSZwPmghIzwkIjFsI3pjT3c3OCchIzwkIjF2LGpdcCZHOSchIzwkIjEkNCJlTnZWYWghIzwkIjE0P2A/Ij1nOychIzwkIjFESFswKClmeGghIzwkIjJEJVFWIUh6Iio9JyEjPSQiMidlWlF2KWYyPychIz0kIjF2Y0xnL003aSEjPCQiMjpmJ0dYNSNSQSchIz0kIjEtdkJJO11OaSEjPCQiMT0lKT06QTNaaSEjPCQiMU4kUiwhR21laSEjPCQiMEQhNCZRVi1GJyEjOyQiMW82L3FSIz1HJyEjPCQiMSUzIypcYi9NSCchIzwkIi5WKlJeKVxJJyEjOSQiMCJSKltzbGxKJyEjOyQiMUhbJSk0ajlHaiEjPCQiMVlkeiUqb3NSaiEjPCQiMWhtdXp1SV5qISM8JCIxenZwayEpKUdPJyEjPCQiMSZcWydcJ29XUCchIzwkIjE2JSpmTSNcZ1EnISM8JCIxQC5iPilId1InISM8JCIxUTddLy9ANGshIzwkIjFbQFgqKTR6P2shIzw3YGpsJCIwcHVFcGohZm8hIzwkIjFeIXktRXVGKXAhIz0kIjJDVCIpeSNbWzFyISM+JCIxdFpbJlImPklzISM9JCIxbCEpM2pmIVJOKCEjPSQiMUU5cElsaHh1ISM9JCIxJ3klSCk0RjhnKCEjPSQiMVoiKSplbVBdcyghIz0kIjE0Ol1MI1soW3khIz0kIjAoWzUsKWVDKHohIzwkIjFKIzMobyRwaDQpISM9JCIxI2Y2aiQqeik+IykhIz0kIjEkKVsiUl0hZlYkKSEjPSQiMVcjPToyLHRZKSEjPSQiMTA7N1I7LCJmKSEjPSQiMW1cczFBczkoKSEjPSQiMUUkR1Z4SyVRKSkhIz0kIjEob0o+TVZAJyopISM9JCIxXl1gNFImZTMqISM9JCIwTVFyWmsmNCMqISM8JCIxLTx1V11GTCQqISM9JCIxbF1NN2MpcFgqISM9JCIxQSVbKnpocCFlKiEjPSQiMSZ5XnZ1MVdxKiEjPSQiMVleOjp0NkcpKiEjPSQiMTAmZUYpeSM9JioqISM9JCIyKXpoLlhRYjI1ISM9JCIxO2x6LFwjKj41ISM8JCIxX29iZWZISzUhIzwkIjIiKT08YCxuWS8iISM9JCIxQ3YycyFRcTAiISM8JCIyLSd5JClHIjQlcDUhIz0kIjJtPilmJj0heSIzIiEjPSQiMmVfZUJDXlQ0IiEjPSQiMjonKT0iKkhBbDUiISM9JCIydz56ZU4kKik9NiEjPSQiMlJgUkVUazc4IiEjPSQiMCgpKlJwYWpWNiEjOyQiMTEtO0VsK2M2ISM8JCIyQWE/SGV4JG82ISM9JCIyOCgzb1InWzI9IiEjPSQiMnQ/VGtwPko+IiEjPSQiMlBhLEt2IVwwNyEjPSQiMid6PScqND0neUAiISM9JCIyZEBBbidHQkk3ISM9JCIyPGIjW0JSZ1U3ISM9JCIxKSlHQyEpXChcRCIhIzwkIjJ0QC5xLll0RSIhIz0kIjJNYmpQNDwoejchIz0kIjIiKilRX10iKTMjSCIhIz0kIjJfQSVHMiNmV0kiISM9JCIyOGNXU0VJb0oiISM9JCIydSpbITNLLCNIOCEjPSQiMlBCbHZQczpNIiEjPSQiMWpiS01NJVJOIiEjPCQiMiIqKmUzIlw5ak8iISM9JCIyXEJZeWEmb3k4ISM9JCIxcmxnL20wIlIiISM8JCIydSFwT2h3VS45ISM9JCIyTENGIj0oKXo6OSEjPSQiMiV6dilbeHAiRzkhIz0kIjInM3prSjNhUzkhIz0kIjJbQzMlKSk9IkhYIiEjPSQiMSJlb14lSEdsOSEjPCQiMm4iKkc+K2F3WiIhIz0kIjJHRCpvZV0tIVwiISM9JCIyIyplXGE2J1ItOiEjPSQiMl8jKjRBPG5aXiIhIz0kIjJYRHEqRyNRcl8iISM9JCIyMWZJZEc0JlI6ISM9JCIybiM0XFUuKT1iIiEjPSQiMkdFXiMqUl5VYyIhIz0kIjIoKWY2Z1hBbWQiISM9JCIxTj54N04qKillIiEjPCQiMjhGSyZwWE8sOyEjPSQiL0VIRWN0ODshIzokIjFPSDAkbzFoaSIhIzwkIjFzSyIpUnhaUTshIzwkIjIlM09kJ3pbM2wiISM9JCIyWSVSTGApPkttIiEjPSQiMjFHJTQ1NGZ2OyEjPSQiMTxZJm8nPid6byIhIzwkIjJDJlxoQklMKzwhIz0kIjEjR3YuMy9GciIhIzwkIjIlPWM4UF4yRDwhIz0kIjFhZipRPll1dCIhIzwkIjItSGMxRDwpXDwhIz0kIjFFbVQyJCk9aTwhIzwkIjJDJ3A8ayRmWHgiISM9JCIxKkhQNFVJcHkiISM8JCIyeGkocHg5SSp6IiEjPSQiMk8nelhNRG42PSEjPSQiMi1JPTdmVlMjPSEjPSQiMmVqeXprOWskPSEjPSQiMXMqUVpxJnlbPSEjPCQiMiQzJCpcaG46aD0hIz0kIjJVa2YjPXlfdD0hIz0kIjJLKCo+XSgpKSplKT0hIz0kIjImNC55SipwIykqPSEjPSQiMmVrUyYpKTRrNT4hIz0kIjI8KTRJWD8sQj4hIz0kIjE9ODEtSlFOPiEjPCQiMWE7IyllVHZaPiEjPCQiMCo+ZTpfN2c+ISM7JCIyJj5CTXNpXHM+ISM9JCIyYWwtIkh0J1spPiEjPSQiMjkqSCdlUVFzKj4hIz0kIjJ3S0JFVzQnND8hIz0kIjJObSRRKlwhKT4tIyEjPSQiMikqKlI5YzpOTT8hIz0kIjJkTC9IaEFuLyMhIz0kIjFsWW1wTzRmPyEjPCQiMSxdVUVaWXI/ISM8JCIxUGA9JHlOUTMjISM8JCIyTm5YKlJvPyc0IyEjPSQiMTRncScqeWQzQCEjPCQiMmFNbU0mKls0NyMhIz0kIjI8b0UtLD9MOCMhIz0kIjE2cSlwMSJwWEAhIzwkIjJtTVpQN2khZUAhIz0kIjJLbzIwPUwvPCMhIz0kIjIpPSFvc0IvRz0jISM9JCIyYU5HU0h2Xj4jISM9JCIyOHApeV1qYTJBISM9JCIycy1cdlM8Kj5BISM9JCIxayQ0VlkpR0tBISM8JCIyRHBwNV9mWUMjISM9JCIyKUcrJHlkSXFEIyEjPSQiMlpPIWZNO1NwQSEjPSQiMSwyTiJwczxHIyEjPCQiMnMuNiJbUDklSCMhIz0kIjF0OChbIVteMUIhIzwkIjIoMzxqaGUpKT1CISM9JCIyJVE/Uj1wREpCISM9JCIyVlBfXih6aVZCISM9JCIyMXI3Pi4qKmZOIyEjPSQiMmwvdCcpM3Ekb0IhIz0kIjJHUUxhOVQyUSMhIz0kIjE+UD4tQTYkUiMhIzwkIjFiUyYqZUtbMEMhIzwkIjElUTlkSmF5VCMhIzwkIjIuc3VDUEQtViMhIz0kIjJpME4jSGtmVUMhIz0kIjJEUiYqZltuXFgjISM9JCIyKEdkdlUmUXRZIyEjPSQiMlkxOyYqZjQoekMhIz0kIjIxU3dpbCEzI1wjISM9JCIwdE9Jcl5XXSMhIzskIjJpMSh6cEYjb14jISM9JCIyPVNkbCNRPkhEISM9JCIyJVF4SiQpW2NURCEjPSQiMXUheSslZiRSYiMhIzwkIjIxVFFvKnBJbUQhIz0kIjFaKClmYCF5J3lEISM8JCIxdyFmLjZcNWYjISM8JCIyPVQ+cjs/TWcjISM9JCIxWyh6UUEiejpFISM8JCIyTzNTMUdpIkdFISM9JCIyLVUrdUxMMGsjISM9JCIybHZnVFIvSGwjISM9JCIxIzRANFh2X20jISM8JCIyOVUibzJsa3hFISM9JCIyeHZUV2M8K3AjISM9JCIyTzQtN2kpUS1GISM9JCIwVml6bmZaciMhIzskIjFtRnNNMjhGRiEjPCQiMS1KWyJ6LCZSRiEjPCQiMiRRTUNbRyg9diMhIz0kIjJtdy5dIVJDa0YhIz0kIjJLNWs8J1xod0YhIz0kIjImUldfPWcpKil5IyEjPSQiMXZaR3ZxTixHISM8JCIyPDZYPzhHUCJHISM9JCIydFcwKSk9KjRFRyEjPSQiMSV5bGJDcSVRRyEjPCQiMThoSy04JTMmRyEjPCQiMiZbazNmQkBqRyEjPSQiMSZ5WWVUJGV2RyEjPCQiMjI3MkVaYXopRyEjPSQiMWR1T0hiSytIISM8JCIyT3pGaGUncDdIISM9JCIxSCIpKUdrbl0jSCEjPCQiMmVZWycqcFF1JEghIz0kIjJaejNrdjQpXEghIz0kIjFKInBKIjM9aUghIzwkIjFuJUgqcD1idUghIzwkIjJLISkqb0VII3ApSCEjPSQiMilRLFgkKVJIKipIISM9JCIyYVo1LS9sOywkISM9JCIyPCIzKHA0T1MtJCEjPSQiMjI5SlA6MmsuJCEjPSQiMm1aIlw1I3koW0khIz0kIjE4PURuI1w2MSQhIzwkIjIpW0AsQy5fdEkhIz0kIjEmW3MyUSIqZTMkISM8JCIyOCNHYFBDRSk0JCEjPSQiMnM6JEglXEwxNiQhIz0kIjJpW2A1Yi9JNyQhIz0kIjFCUSJ5Z3ZgOCQhIzwkIjFmVGRrbXVaSiEjPCQiMSZcTThzPCw7JCEjPCQiMjEkWzR5KClbc0ohIz0kIjJsO2JbJClmWz0kISM9JCIyRF06OyozQig+JCEjPSQiMUtlUFs+ZzRLISM8JCIxb2g4MEkoPkEkISM8JCIxL2wqPTFXVkIkISM8JCIyMSVvbD1ecllLISM9JCIxd3JUdmgzZkshIzwkIjJEXnhAQmQ5RiQhIz0kIjFceSQqKUdHUUckISM8JCIxeSIpcFgkKj4nSCQhIzwkIjE5JmVDU3EmM0whIzwkIjAmKT0jZjklNEskISM7JCIxJz16Zl43TEwkISM8JCIyRF9SRmQkb1hMISM9JCIyJWUpKlxIWTBlTCEjPSQiMSU+Z2lvRC9QJCEjPCQiMUIwLVZueiNRJCEjPCQiMCczeSp6bl5SJCEjOyQiMSc+VGwmKVF2UyQhIzwkIjFLOkk4KjQqPk0hIzwkIjIlbz0xcTRHS00hIz0kIjEuQSNvLV9ZVyQhIzwkIjBhI2UkM0JxWCQhIzskIjF3R01TVFJwTSEjPCQiMTFLNSg+bDxbJCEjPCQiMVVOJ1FET1RcJCEjPCQiMXlRaTV0XTFOISM8JCIyT0AlUW4keSk9TiEjPSQiMiZcWDlDJVw3YCQhIz0kIjEnKVshNFs/T2EkISM8JCIxQV9tUDoqZmIkISM8JCIxXmJVJWZpJG9OISM8JCIxKSllPV5PdCFlJCEjPCQiMUJpJXpxL0pmJCEjPCQiMiZmbHFrZFowTyEjPSQiMScqb1lAbyV5aCQhIzwkIjI5QkYjeXlASU8hIz0kIjFudilcJCopZVVPISM8JCIxJyp5dSIqKmZcbCQhIzwkIjJPQjMmWzVMbk8hIz0kIjImcCZvXzUtKHpPISM9JCIxMCpHPzt0P3AkISM8JCIyOUMqeT1VVy9QISM9JCIxeSZcYkY6b3IkISM8JCIxOCo0QkwnPUhQISM8JCIxVS0yKlFkOnUkISM8JCIxeTAkZVdHUnYkISM8JCIyYSI0Zi0mKkhtUCEjPSQiMjlEXiRmMG55UCEjPSQiMm1lNmhoVDV6JCEjPSQiMUM+KEduN00hUSEjPCQiMEVLJ0hQeTpRISM7JCIxKmUjUid5YSJHUSEjPCQiMUNIOlZlX1NRISM8JCIxaEsiKioqbypHJlEhIzwkIjEoZnRtJnpFbFEhIzwkIjFMUlY4IVJ3KFEhIzwkIjIlb1U+cSssISpRISM9JCIxMVkmcDciUS1SISM8JCIxTVxyJD1fWiJSISM8JCIxcl9aU0s3RlIhIzwkIjExY0IoSCVcUlIhIzwkIjJEJWYqUk5sPSZSISM9JCIxeml2NWtCa1IhIzwkIjJXaDt2WTJtKFIhIz0kIjFecEZDJnkqKSlSISM8JCIwR1A1ZVw4KyUhIzskIjE7d3pQMXM4UyEjPCQiMkQmemIlcCI0RVMhIz0kIjEpRz04dmklUVMhIzwkIjJXaXkhM1EkMzAlISM9JCIwJypRWydbP2pTISM7JCIxJ0gqZkBmZHZTISM8JCIxRSdmJHlwJXozJSEjPCQiMWkqPl4uPS41JSEjPCQiMSlIISk9NCpvN1QhIzwkIjFNMWtbLDFEVCEjPCQiMCg0UzA3VlBUISM7JCIxMTg7aUEhKVxUISM8JCIxVTsjKj1MPGlUISM8JCIxej5vdlZhdVQhIzwkIjEzQldLYSJwPSUhIzwkIjFXRT8qWydHKj4lISM8JCIyJ3pIJ2ZhZDtAJSEjPSQiMmJKQkZnR1NBJSEjPSQiMV9PW2YnKlJPVSEjPCQiMSkpUkM7MnhbVSEjPCQiMUNWK3Q8OWhVISM8JCIxYFl3SEdedFUhIzwkIjInKilcXycpUSllRyUhIz0kIjJiSyZHVlxEKUglISM9JCIxaWMvK2dpNVYhIzwkIjEpKmYhbzAoKkhLJSEjPCQiMU1qYzgib2BMJSEjPCQiMXBtS3EiUnhNJSEjPCQiMicqKnAzRi02Z1YhIz0kIjJiTFpRRyJbc1YhIz0kIjFyd2dTQiZbUSUhIzwkIjJ1K290UkJzUiUhIz0kIjFXJEdUWCVmNFchIzwkIjBvKSkzXmw+VSUhIzskIjE7IVx3Y09WViUhIzwkIjFXJDRXaTJuVyUhIzwkIjI5b3A2b3khZlchIz0kIjJ0LEl6dFw5WiUhIz0kIjJFTiFwJXo/UVslISM9JCIwcF05Jj0+J1wlISM7JCIxRTVAM0hjM1ghIzwkIjFpOChcJ1IkNF8lISM8JCIxInBKPC0wTGAlISM8JCIxRT9ceWduWFghIzwkIjFqQkROci9lWCEjPCQiMSpwNz8+PS9kJSEjPCQiMlcudChbIyp5I2UlISM9JCIxc0xgMC47JmYlISM8JCIxM1BIaThgMlkhIzwkIjJtLmEhPkMhKj5ZISM9JCIyRVA5ZVp0QWolISM9JCIyJjNaZEtYa1dZISM9JCIxWF1MKmU6cWwlISM8JCIxIlEmNFltUXBZISM8JCIxPGQmR3FkPG8lISM8JCIyTzA7J2YoR1RwJSEjPSQiMiYqUXdqIikqXDFaISM9JCIyJj1uOHQzKCk9WiEjPSQiMlcwKCopSD5DSlohIz0kIjBSZG0pSGhWWiEjOyQiMUZ4VFZTKWZ2JSEjPCQiMWoheSw1YiRvWiEjPCQiMSpSUXA6RTJ5JSEjPCQiMU4oKXA4czQkeiUhIzwkIjFrIWYvRm9hIVshIzwkIi8lPnNLUnkiWyEjOiQiMU8oelJRNS0kWyEjPCQiMXMrdVM5ZVVbISM8JCIxMy9dKFxfXCZbISM8JCIxWDJFYU5LblshIzwkIjIyM0A1aCVwelshIz0kIjInNDl5bmMxIypbISM9JCIyY3VUWHNPVyFcISM9JCIyOjMtOHkybyJcISM9JCIxPUMxUSl5IkhcISM8JCIxYUYjWyopXDolXCEjPCQiMDQkZV40I1ImXCEjOyQiMm1VViQzP0htXCEjPSQiMmN2Ll4xaid5XCEjPSQiMjo0az03TTUqXCEjPSQiMnVVQyd5XlMuXSEjPSQiMWxaUU5peDpdISM8JCIvXjkjSFoiR10hIzokIjFPYSEqWyQ9MC8mISM8JCIxc2RtMCUqKUcwJiEjPCQiMjo1RUNZZ18xJiEjPSQiMnVWJz0+Omp4XSEjPSQiMkV4WWZkLSs0JiEjPSQiMDYyRmp0QjUmISM7JCIxWXVZKm9XWjYmISM8JCIxInlGaXU6cjcmISM8JCIxPCIpKUghb1tSXiEjPCQiMVklWyhmeSY9OiYhIzwkIjEkeTNsIipHVTsmISM8JCIxPiJwSygqKmZ3XiEjPCQiMlhYSCsuciopPSYhIz0kIjEjeip5JzNVOD8mISM8JCIxRyxiVkpyOF8hIzwkIjFqL0orVTNFXyEjPCQiMkV6cXFEYiVRXyEjPSQiMUg2JFFKRTNEJiEjPCQiMWw5ZnF0PmpfISM8JCIxLD1ORiVvYkYmISM8JCIxT0A2JVtSekcmISM8JCIyT1pzM2E1LkkmISM9JCIyJzRHaihmIm83YCEjPSQiMiZRSlJhRTBEYCEjPSQiMlhaYDZyQnVMJiEjPSQiMTZRInp3JXpcYCEjPCQiMVpUbkNlO2lgISM8JCIxJFtNOSlvYHVgISM8JCIyJz5bPlF6IXBRJiEjPSQiMmI6YlwqKnkjKlImISM9JCIyOVw6PDBdO1QmISM9JCIyLyNlWjM2LUNhISM9JCIxY2hCbEBST2EhIzwkIjEkXCcqPkFqKFthISM8JCIxSG92eVU4aGEhIzwkIjFscl5OYF10YSEjPCQiMjldeEFSd2VbJiEjPSQiMVB5Llx1QylcJiEjPCQiMW0iKXowJj0xXiYhIzwkIjEtJmVEYyopSF8mISM8JCIxUik9JD4xT05iISM8JCIxdiJ6Z25KeGEmISM8JCIxNiZSR3QtLGMmISM8JCIybSUpKmYqeXRDZCYhIz0kIjEkPWdqJVslW2UmISM8JCIxNzA3LmZAKGYmISM8JCIxWzMpKWZwZTRjISM8JCIxJT1UbSxlPmkmISM8JCIxQDpTdCFIVmomISM8JCIybSY9O0kscVljISM9JCIyRD5BcD1yIWZjISM9JCIxSERvVkFXcmMhIzwkIjFlR1crTCJRbyYhIzwkIjElPi5zTiU9J3AmISM8JCIwYGpSVGImM2QhIzskIjFtUXNxayM0cyYhIzwkIjJEPyVbRnZITGQhIz0kIjImUVhDJWVvY3UmISM9JCIyVyhbK1QnUiFlZCEjPSQiMk0/bHhwNS94JiEjPSQiMVJiX2E8eSN5JiEjPCQiMXdlRzZHOiZ6JiEjPCQiMTdpL29RXzJlISM8JCIxW2whWyNcKik+ZSEjPCQiMlcpb2MiKWZFS2UhIz0kIjBBRiRRcWpXZSEjOyQiMVx2MyY0M3EmZSEjPCQiMSYpeSU9OnokcGUhIzwkIjFAIzMnMy12IillISM8JCIxZSZvYEVAVCplISM8JCIxJSopR0BLI1wxZiEjPCQiMidIIyopKXlMJyk9ZiEjPSQiMWwmXGNWTTckZiEjPCQiMS0qNENcME8lZiEjPCQiMUotPFxsKGYmZiEjPCQiMW4wJGZnWiRvZiEjPCQiMS40cGknPTIpZiEjPCQiMVE3WD4oKjMkKmYhIzwkIjJiZDZpeGdhKychIz0kIjI6Ij4oSCQ9JHksJyEjPSQiMVpBdCopRz9JZyEjPCQiMXdEXFlSZFVnISM8JCIxOEhELl0lXDAnISM8JCIxXEssZ2dKbmchIzwkIjEmZXRuNihvemchIzwkIjI6I1JgdCJlPzQnISM9JCIydUQlSEkjSFc1JyEjPSQiMSRmYXFHK282JyEjPCQiMUFcIlFNciJIaCEjPCQiMnZEdjBTVTo5JyEjPSQiMSZmTnRYOFI6JyEjPCQiMUpmNDlYR21oISM8JCIxbmkmM2RiJ3loISM8JCIxLm1oRm0tIj4nISM8JCIxUnBQJW8oUi5pISM8JCIxb3M4VChvZEAnISM8JCIxL3cqeXpSIkdpISM8JCIxVHpsYTNeU2khIzwkIjF4Iz05Ij4pR0QnISM8JCIxNid5Im9IRGxpISM8JCIxXCpRXC1Dd0YnISM8JCIxJUcqcCIzJioqKkcnISM8JCIxOSdmJVFoTy1qISM8JCIwJio+Xz5QWkonISM7JCIxJ0chKT5EM3JLJyEjPCQiMUIxdTMkeiVSaiEjPCQiMWU0XWwuJj1OJyEjPCQiMSRIaEFVQFVPJyEjPCQiMUo7LXpDZndqISM8JCIxaD55Tk4nKilRJyEjPCQiMSdIVURmTThTJyEjPCQiMUpFSVxjcThrISM8JCIxcEgxMW4yRWshIzwkIjEvTCNHd1olUWshIzwkIjBrJGU+KT0zWCchIzskIjF2Uk13KSo9amshIzwkIjExVjVMNGN2ayEjPCQiMVZZJykqKT4kelsnISM8JCIxeVxpWUlJK2whIzwkIjE4YFEuVG43bCEjPCQiMV5jOWdeL0RsISM8JCIxJilmIXBAO3VgJyEjPCQiMUFqbXRzeVxsISM8JCIxXm1VSSRlQGMnISM8JCIxJylwPShRSFhkJyEjPCQiMUN0JVJXK3BlJyEjPCQiMG0yMl1yIypmJyEjOyQiMScqellkRGs2bSEjPCQiMUwkR1VoOFNpJyEjPCQiMW4nKSk0biVRT20hIzwkIjEuIVx4c2IoW20hIzwkIjFMJDRYeUU2bSchIzwkIjFvJ3A3JXlcdG0hIzwkIjExKy4pKilvZW8nISM8JCIxVS56YSpSIylwJyEjPCQiMXkxYjY1aDVuISM8JCIxODVKbz8pSHMnISM8JCIxXDgyREpOTm4hIzwkIjBvSj09Q3h1JyEjOyQiMTo/ZlFfNGduISM8JCIwTl9gSG1DeCchIzskIjEobzdATlBbeSchIzwkIjFESSgpMyUzc3onISM8JCIwT0xjWXomNG8hIzskIjEmcCRSQTAmPiNvISM8JCIxRFM6ejpLTW8hIzwkIjFpViJmaiNwWW8hIzwkIjBwdUVwaiFmbyEjOzdgamwkIjFHNG9ceSMqKT4oISM9JCIxNyRSPEJvKEd0ISM9JCIxKHAoejgnMydldSEjPSQiMDNjZSoqWyUpZSghIzwkIjEjUjl6UCpHPXghIz0kIjF3RigqZihIIlt5ISM9JCIwO0o/OXF6KHohIzwkIjFWJiozQzAieTUpISM9JCIxRHo5MTRsUCMpISM9JCIxNGo/KUciXG4kKSEjPSQiMSZway1uSnRcKSEjPSQiMXhJS18/PEYnKSEjPSQiMFIiUU1DLGQoKSEjPCQiMXUoUmsiRyZvKSkpISM9JCIxYyIpXCk+JHA7ISohIz0kIjBhYzBlTGw5KiEjPCQiMUNcaGlSUHcjKiEjPSQiMTJMbldWQDElKiEjPSQiMSRwSm5zYWdgKiEjPSQiMS8rejNeKmVtKiEjPSQiMSlRWzNcTmR6KiEjPSQiMXNuIUgoZWREKiohIz0kIjJhXidcRDthMDUhIz0kIjFhQnFqY189NSEjPCQiMkE+Mz5xNDouIiEjPSQiMjAuOSx1JFxXNSEjPSQiMj0nKT4keXhaZDUhIz0kIjItcURsIj1ZcTUhIz0kIjInUTp0YWVXJDMiISM9JCIyb1BQSCopSGs0IiEjPSQiMl9AVjYkUlQ0NiEjPSQiMlEwXCRwelJBNiEjPSQiMSMqW2IyP1FONiEjPCQiMkpzZ2QvbSRbNiEjPSQiMjpjbVIzXTg7IiEjPSQiL0M8QVRMdTYhIzokIjIjUSN5Ljs9dD0iISM9JCIybzIlZSk+LS4/IiEjPSQiMl8iKip5T2lHODchIz0kIjJNdiYqXEZxaUEiISM9JCIyVmUsS0phI1I3ISM9JCIyRlUyOU5RQUQiISM9JCIyOkU4JypRQV9FIiEjPSQiMigqND55VTEjeTchIz0kIjFRXC1tLz4iSCIhIzwkIjJpeElVXXVUSSIhIz0kIjJbaE9DYWVySiIhIz0kIjJmV1UxZVUsTCIhIz0kIjJYR1spPW03VjghIz0kIjJGN2FxbDVoTiIhIz0kIjI2JypmX3AlNHA4ISM9JCIyJCp6bE10eT9RIiEjPSQiMndqcjt4aV1SIiEjPSQiMmpaeCk0by8zOSEjPSQiMnRJJDNbMy5AOSEjPSQiMmU5KkcnKVssTTkhIz0kIjElKVxcQyopKnBXIiEjPCQiMkQjM3FpSCkqZjkhIz0kIjIybTE0K25IWiIhIz0kIjIkKlw3IlI1JmZbIiEjPSQiMnZMPXQyTiopXCIhIz0kIjInb1RfOiI+Pl4iISM9JCIycytJUDouXF8iISM9JCIyYiVlJD4+KCl5YCIhIz0kIjJSb1QsQnIzYiIhIz0kIjFBdk1vXyZRYyIhIzwkIjIwT2BsSVJvZCIhIz0kIjEqPmZaTUIpKmUiISM8JCIwLmxIUTJHZyIhIzskIjIlbzM8QDl6OjshIz0kIjEyblBmYXhHOyEjPCQiMl9hI2UoXGY8ayIhIz0kIjJPUSl5Tk51YTshIz0kIjJDQSUqUmRGeG0iISM9JCIyLzErQWg2Mm8iISM9JCIyOyplU11jcCRwIiEjPSQiMHQ2Jylvem1xIiEjOyQiMW92Im9zaic+PCEjPCQiMm9TQl13WkV0IiEjPSQiMVgjSEshPWpYPCEjPCQiMkszTjklZWhlPCEjPSQiMjwjNGt6KSpmcjwhIz0kIjB3WXkiUmUleSIhIzskIjI3Zl9nJnpjKHoiISM9JCIyJ0glZVUqPmI1PSEjPSQiMW9VWUtnYEI9ISM8JCIyazVxMTI/bCQ9ISM9JCIyWyVmKCkzVF1cPSEjPSQiMSR5IjNaIilbaT0hIzwkIjFBd0cmPXNhKD0hIzwkIjJGWCRcQmlYKSk9ISM9JCIyM0gqcGgtVyw+ISM9JCIyJkheISoqSENXIj4hIz0kIjJ3JzQ2USQzdSM+ISM9JCIyaiFvSndCUlM+ISM9JCIyV2tBWFR3TCY+ISM9JCIyR1tHRlhnaic+ISM9JCIxOVYkNFxXJHo+ISM8JCIyQjpTIkgmR0IqPiEjPSQiMjIqZk1uREowPyEjPSQiMUg9YjBtSD0/ISM8JCIyd21kUGshR0o/ISM9JCIyY11qPm9rVS8jISM9JCIyV01wLHNbczAjISM9JCIyYjx2JGVGQnE/ISM9JCIxOTVlJ3o7SzMjISM8JCIyQiZveU0zPyc0IyEjPSQiMi5wIypIKFs9NEAhIz0kIjFIJik+NipvQDcjISM8JCIydk8vJVxIOk5AISM9JCIxMS1oKClwOFtAISM8JCIxUGciZS1ANjsjISM8JCIyYSg9LWtdNXVAISM9JCIyTnJGQTUqMyg9IyEjPSQiMkFiTC85dCs/IyEjPSQiMjJSUid5cjA4QSEjPSQiMihHXyVvQFRnQSMhIz0kIjFuNTBiXy1SQSEjPCQiMicpKm9EJEg0P0QjISM9JCIybXRpOUwkKlxFIyEjPSQiMXYmbydwdCh6RiMhIzwkIjJHVHV5U2g0SCMhIz0kIjFfLTNZYSVSSSMhIzwkIjIxNCdHJVtIcEojISM9JCIyJEc+XEFOIipIQiEjPSQiMW54cGd2KkdNIyEjPCQiMiMpZi4qKWYiKWVOIyEjPSQiMm1WNHJqbClvQiEjPSQiMXZfSnYnXD1RIyEjPCQiMk02QE5yTFtSIyEjPSQiMjomcHNeeCJ5UyMhIz0kIjIteksqKnksM1UjISM9JCIxRydRIkdleUxDISM8JCIyKGZXTW0pcG5XIyEjPSQiMnlIXVghUnZmQyEjPSQiMm04Y0YlenRzQyEjPSQiMlkoPic0KT5zJlsjISM9JCIxOHk7PmdxKVwjISM8JCIyOWx0dDAhcDZEISM9JCIyJipbemI0dVlfIyEjPSQiMjFLJnlMImV3YCMhIz0kIjFmNio+PFUxYiMhIzwkIjEoKnA+NWlpakQhIzwkIjFPR1NbLWh3RCEjPCQiMlluM21HJWYqZSMhIz0kIjJFXjlbS3lEZyMhIz0kIjFeLi1qQmM6RSEjPCQiMSM9RTdTWSZHRSEjPCQiMUA/VlIvYFRFISM8JCIyJ2V5anhXXmFFISM9JCIyeHBWZV4pXG5FISM9JCIyZWBcU2IjWyFvIyEjPSQiMXVgRCNmbU1wIyEjPCQiMkVAaC9qXWtxIyEjPSQiMVdxbW9ZVj5GISM8JCIyPSlHKG9xPUN0IyEjPSQiMjBzeV11LWF1IyEjPSQiMWZYRyR5J1FlRiEjPCQiMnRSIVxAM1ByRiEjPSQiMU9pcGZbTiV5IyEjPCQiMlEyLXoqKVF0eiMhIz0kIjEwejVPSEs1RyEjPCQiMlB1OFYocElCRyEjPSQiMjllPkQsIkhPRyEjPSQiMFVEMjB2I1xHISM7JCIyJmU3JCopM2ZBJ0chIz0kIjEoNFByN1ZfKEchIzwkIjFOSE1sckEpKUchIzwkIjJvd1tOPzY3IUghIz0kIjJfZ2E8QyY+OUghIz0kIjJFV2cqeiN6ciNIISM9JCIyPEdtIj1MO1NIISM9JCIyKD5AUGN0OWBIISM9JCIyKWV6ZCVSSmgnSCEjPSQiMmx6JHlLYTZ6SCEjPSQiMnhpKik0Wio0IypIISM9JCIya1kmPjROMzBJISM9JCIxLzhTWnYxPUkhIzwkIjFWcmcmZV41LiQhIzwkIjI4KUgiUWlOUy8kISM9JCIyLyMpPT9tPnEwJCEjPSQiMnhsQy1xLisyJCEjPSQiMSdcSSVReClIMyQhIzwkIjFHamp3PChmNCQhIzwkIjJrO1VbImUmKjNKISM9JCIyVytbSSYpUj43JCEjPSQiMVZRRCIqUSNcOCQhIzwkIjIwb2YlSHohejkkISM9JCIyJz5ibW4+KjM7JCEjPSQiMWU4KGUrd1E8JCEjPCQiMSo9eFMvZ289JCEjPCQiMUdJRyMzVykqPiQhIzwkIjJjJykpWz8iR0dAJCEjPSQiMS9acGVAImVBJCEjPCQiMkNhK3A+J3pRSyEjPSQiMjpRMV5CIXleSyEjPSQiMT5BSnRVd2tLISM8JCIwMD06Slt4RiQhIzskIjEqKVFzXEJ0IUgkISM8JCIydnNIelE7UEkkISM9JCIxbWI4RS9xO0whIzwkIjEvOU1rV29ITCEjPCQiMVZzYS0mb0VNJCEjPCQiMi8zYDJhX2NOJCEjPSQiMTcqZSp5bGpvTCEjPCQiMHZrcmg/O1EkISM7JCIxKWVxYGwvWVIkISM8JCIxRmtkJHApZTJNISM8JCIyYkUjeUpGZD9NISM9JCIxLiIpKSpwbmJMTSEjPCQiMVVSPjMzYVlNISM8JCIxdSgqUllbX2ZNISM8JCIyOmgwWSkpM0RaJCEjPSQiMFg2RyNIXCZbJCEjOyQiMndHPDUncFopXCQhIz0kIjFGSkEqKjRZNk4hIzwkIjFsKkd1LlhXXyQhIzwkIjJOIVtqdiFIdWAkISM9JCIxTTElUTY4L2IkISM8JCIyTVpZPzooUmpOISM9JCIxN0JEIT4iUXdOISM8JCIyJlwiZSVHX08qZSQhIz0kIjEpKVJtbSNcQmckISM8JCIyaiMpcFtJTGBoJCEjPSQiMWxjMlZ0SkdPISM8JCIxLjpHIlEsOGskISM8JCIyWUwoWz5hR2FPISM9JCIxc0pwZCVwc20kISM8JCIyOSwqKmVcYC1vJCEjPSQiMVxbNU12QiRwJCEjPCQiMSlvNUJkQGlxJCEjPCQiMUVsXjVjPz5QISM8JCIyV09BKFsnKj1LUCEjPSQiMSc+R3BvdF51JCEjPCQiMk4uTV5zZCJlUCEjPSQiMkUoKVJMd1Q2eCQhIz0kIjE2ZGEsZTcleSQhIzwkIjBiXihSKTRyeiQhIzskIjEoUWR6KFE0NVEhIzwkIjJjQWpoInoyQlEhIz0kIjFlIXBWJj4xT1EhIzwkIjJhKltkIypmL1xRISM9JCIxTTJ5SSsuaVEhIzwkIjFzbCkqb1MsdlEhIzwkIjIyVCM+MiIpKnopUSEjPSQiMVwjKVJYQCk0IVIhIzwkIjJ2My9PPW1SIlIhIz0kIjE+KjQ9QV1wI1IhIzwkIjJtdjorRU0qUlIhIz0kIjEmZkAjKUg9SCZSISM8JCIyTVZGa0wtZidSISM9JCIxc0tqdWopKXlSISM8JCIwNlJHVHE9KlIhIzskIjFcXC9eVyZbKyUhIzwkIjIlejJEKltReSwlISM9JCIyJj1tWEZEIzMuJSEjPSQiMWRDbWxsIVEvJSEjPCQiMmBIb1FnIXpjUyEjPSQiMU1UMlVZeHBTISM8JCIyOigqei1vZUYzJSEjPSQiMCJlWz1GdSY0JSEjOyQiMVQ7cGNuczNUISM8JCIwWygqW3o1PDclISM7JCIxPUw1TFtwTVQhIzwkIjJtOjQ4KCl5dzklISM9JCIxJipcXjRIbWdUISM8JCIxTDNzWnBrdFQhIzwkIjFzbSNmKTRqJz0lISM8JCIxLkQ4Q11oKj4lISM8JCIxVCRRQjEqZjdVISM8JCIyJHpUYStKZURVISM9JCIxPSt2UXJjUVUhIzwkIjFkZSZwPF46RCUhIzwkIjEmcGheQE5YRSUhIzwkIjFMdk9gIz52RiUhIzwkIjJXT3Q6SC4wSCUhIz0kIjEuI3ooSHRbLlYhIzwkIjFUXSl6T3JrSiUhIzwkIjF6Mz4xYVhIViEjPCQiMnVyJ1JXJVJDTSUhIz0kIjFjRGcjW0JhTiUhIzwkIjElUjMzXzIlb1YhIzwkIjFMVSxmOlIiUSUhIzwkIjFrK0EoZnZWUiUhIzwkIjEtZlVOJ2Z0UyUhIzwkIjFUPGp0T00/VyEjPCQiMid5diQ9ckZMViUhIz0kIjE9TS9dPEpZVyEjPCQiMWMjXCMpeSZIZlchIzwkIjJYNGJrIyl6QVolISM9JCIxRDRta1FFJlslISM8JCIxa24nRyF6QylcJSEjPCQiMS1FMlQ+QjZYISM8JCIxVCV5I3pmQENYISM8JCIyJ3pVWzwrP1BYISM9JCIybTYhcGJTPV1YISM9JCIxY2YqUTRvSmMlISM8JCIxKHksQDhfaGQlISM8JCIxRHdJcWg4KmUlISM8JCIxak1eMy03LVkhIzwkIjEtJD5uQy9eaCUhIzwkIjFUXiNcRykzR1khIzwkIjImeTQ4QkIyVFkhIz0kIjE7b0xoajBhWSEjPCQiMiRbRWEqUlNxbSUhIz0kIjJ1W1t4VkMrbyUhIz0kIjJYS2FmWjNJcCUhIz0kIjFqLDs5RCpmcSUhIzwkIjEtZ09fbCgqPVohIzwkIjIvJT1kIWZnPnQlISM9JCIxeXd4R1klXHUlISM8JCIyJzROKXBtR3p2JSEjPSQiMVokKj0wRiI0eCUhIzwkIjJrPSZSVm4qUXklISM9JCIxRDVnInkhKW96JSEjPCQiMkQnbyEpPlsnKTRbISM9JCIyO3E3IWUpW0cjWyEjPSQiMGE9aSpHJGUkWyEjOyQiMXJWVU1wIilbWyEjPCQiMTQtanM0IT0nWyEjPCQiMVtnJDMsJnl1WyEjPCQiMScpPS9cIXB4KVshIzwkIjJXc1pzM2AyIVwhIz0kIjFqTlhEcnQ4XCEjPCQiMSwlZk87QG4jXCEjPCQiMidSXyc9PzAoUlwhIz0kIjIvMnIrQypvX1whIz0kIjE0cEZ5S25sXCEjPCQiMVtGWzt0bHlcISM8JCIxJ2Upb2E4ayIqXCEjPCQiMUJXKkdSRFkrJiEjPCQiMkNFKzZWNHcsJiEjPSQiMSxoSXBNZkldISM8JCIxSz5eMnZkVl0hIzwkIjB4PGRhaGwwJiEjOyQiMTRPI1JlWCZwXSEjPCQiMnZXSEBpSEQzJiEjPSQiMSZHTi5tOGI0JiEjPCQiMUM2YSlwKFwzXiEjPCQiMWlwdU88W0BeISM8JCIyTnpfXHhsVzgmISM9JCIyRWplSiIpXHU5JiEjPSQiMXBXT15RVmdeISM8JCIxMy5kKil5VHReISM8JCIxWmh4Rj5TJz0mISM8JCIyYik+KWYnZlEqPiYhIz0kIjJZI3k9LytQN18hIz0kIjJhbCRSVVNORF8hIz0kIjElXCpmITNRJFFfISM8JCIyOkwwKT1AS15fISM9JCIyMTw2cToxVkUmISM9JCIxM3FAJj4hSHhfISM8JCIxWkdVTFVGIUgmISM8JCIyV29HO0ZlS0kmISM9JCIybV5NKTRCQztgISM9JCIxYS4vW2pBSGAhIzwkIjJNPllpUTVBTSYhIz0kIjIvLl9XVSU+YmAhIz0kIjImcHlsaSV5Im9gISM9JCIyJzNQJzNdaTZRJiEjPSQiMmNhcCFSbDklUiYhIz0kIjF5YEZ4MDgyYSEjPCQiMTw3WzpZNj9hISM8JCIyWTAob2AnKTRMYSEjPSQiMSQqRyo9cCMzWWEhIzwkIjFLKCk0SW4xZmEhIzwkIjBkLyRvMjBzYSEjOyQiMnZTNWwhWy4mWyYhIz0kIjFSaXJXKT0hKVwmISM8JCIxeT8jSClHKzZiISM8JCIxO3o3QHApUl8mISM8JCIyTnZMJGY0KHBgJiEjPSQiMkVmUnYqXCYqXGIhIz0kIjFKYXVOIVJIYyYhIzwkIjBGXlIyQmZkJiEjOyQiL3I6N3IhKillJiEjOiQiMVJIT102Kj1nJiEjPCQiMXgobyYpPXZbaCYhIzwkIjE6WXhFI2Z5aSYhIzwkIjFhLylcRVYzayYhIzwkIjEkSCc9LnQjUWwmISM8JCIxSkBSVDgib20mISM8JCIxcHpmemB6emMhIzwkIjIwIVEheVR6RnAmISM9JCIxUSc0Z1hqZHEmISM8JCIxeWFAJVxaKD1kISM8JCIxOjhVSzp0SmQhIzwkIjFgcmlxYnJXZCEjPCQiMSQqSCQpMycqcGRkISM8JCIxSilRcWskb3FkISM8JCIyQ21XX29uT3kmISM9JCIyJSpcXU1zXm16JiEjPSQiMiZRamxoZGo0ZSEjPSQiMnc8aSkqej5FI2UhIz0kIjE6IW8hUVFnTmUhIzwkIjFfUUZ3eWVbZSEjPCQiMSNwelciPmRoZSEjPCQiMk9fJm9fZmJ1ZSEjPSQiMWg4KjMqKlJ2KWUhIzwkIi9zNEhTXytmISM6JCIxUUlJbiEzTiJmISM8JCIybCgpM2I1I1xFZiEjPSQiMmNyOVA5dyVSZiEjPSQiMWAwIz49Z0MmZiEjPCQiMSZRRSxBV2EnZiEjPCQiMkRBSyRlI0cleWYhIz0kIjAxUWxINzkqZiEjOyQiMSxSdU1qUi9nISM8JCIxUShcSFAhUTxnISM8JCIxeGI6NldPSWchIzwkIjJYVGgkXCVbTC8nISM9JCIxWnNjKFtLajAnISM8JCIxJjN0ZF87JHBnISM8JCIyOSMqeVJjK0IzJyEjPSQiMjB3JT0tWUcmNCchIz0kIjInKmYhUlMnbyMzaCEjPSQiMVBrZnlFREBoISM8JCIxd0Ehb3JPVTgnISM8JCIybDUzXXY/czknISM9JCIyYyVSQCR6Ly07JyEjPSQiMSZ5PjkkKSk9dGghIzwkIjFBY2lwRzwnPSchIzwkIjFoOSR5IXA6Kj4nISM8JCIvdC5ZNDk3aSEjOiQiMnc4VlUpXDdEaSEjPSQiMlkoKltDLTQiUWkhIz0kIjEyW2xnSTReaSEjPCQiMVkxJykpNHhTRSchIzwkIjElW21xOGhxRichIzwkIjFAQkZ2Xi8hSCchIzwkIjA7eU1ASElJJyEjOyQiLiVvXkssO2ohIzkkIjFQKSopKSpHKCoqR2ohIzwkIjFvYzRHOCk+TSchIzwkIjEyOkltYCdcTichIzwkIjFYdF0vJVx6TychIzwkIjEkPThGV0w0USchIzwkIjFCIT40WzxSUichIzwkIjAnWzc+OiFwUychIzskIjEpcEl0YiYpKT5rISM8JCIxSGxgJmZwR1YnISM8JCIxb0J1TE8mZVcnISM8JCIxMiNbPm5QKWVrISM8JCIxV1M6NTwjPVonISM8JCIxJCkpZiRbZCFbWychIzwkIjFBZGMneSp5KFwnISM8JCIwY3JaI1F4NWwhIzskIjEjUnhIJ3l2QmwhIzwkIjBCJD0sPnVPbCEjOyQiMXAhKlFSZnNcbCEjPCQiMTFcZngqNEZjJyEjPCQiMVgyIWUsJXB2bCEjPCQiMSRlMVMweScpZSchIzwkIjFAQ0AjNGk7ZychIzwkIjFgIz0vOFlZaCchIzwkIjEjNEMnbyxqRm0hIzwkIjAkKkhvPzkxaychIzskIjFvZC5YIylmYG0hIzwkIjEyO0MkRyNlbW0hIzwkIjFXdVdAamN6bSEjPCQiMSNHYCdmLmIjcCchIzwkIjE5ImZ5Uk1icSchIzwkIjFgXDFPJT0mPW4hIzwkIjEienFVWi06dCchIzwkIjBqd0NeJ1tXbiEjOyQiMW9Db10wWmRuISM8JCIxMSQpKSkpZWEveCchIzwkIjFWVDRGJ1FNeSchIzwkIjF2KipIbEVVJ3onISM8JCIxOmVdLm5TNG8hIzwkIjFfO3JUMlJBbyEjPCQiMFw8KnpaUE5vISM7JCIwTEIiPSllJFtvISM7JCIxbiJIaiZHTWhvISM8JCIxL11gJSpvS3VvISM8JCIxTjN1SzRKKClvISM8JCIxd20lNChcSCtwISM8JCIxOEQ6NCF6SyJwISM8JCIxXiRldC9qaSNwISM8JCIxIz5rYjNaI1JwISM8JCIwLnFQN0pBJnAhIzskIjFuZSg+OzpfJ3AhIzwkIjEwPD0rIyo+eXAhIzwkIjFQdlFRSz0iKnAhIzwkIjF2TGZ3czsvcSEjPCQiMTcjKno5ODo8cSEjPCQiMV5dK2BgOElxISM8JCIwKjNAIlI+Si8oISM7JCIxR25USE01Y3EhIzwkIjFuRGludTNwcSEjPCQiMSlSR2Vdcj8zKCEjPCQiMU9VLldiMCY0KCEjPCQiMXUrQyNlUiEzciEjPCQiMThmVz9PLUByISM8JCIxXzxsZXcrTXIhIzwkIjBmZG9wIipwOSghIzskIjFITTFOZCgqZnIhIzwkIjBFcEt4Zkg8KCEjOyQiMSk0djkiUSVmPSghIzwkIjFING9ceSMqKT4oISM8N2BqbCQiMTp2ei4pZStaKCEjPSQiMSYqW0lCJCp5L3chIz0kIjF2QSJHJSk+JlJ4ISM9JCIxYyc+Qk9dVSh5ISM9JCIxanAjPSkzKSozISkhIz0kIjFXVkwsOXJWIikhIz0kIjFCPCUzIz5XeSMpISM9JCIxLyJcLldzSlQpISM9JCIxJ1tjKWZIIXphKSEjPSQiMWxRT3pNaiNvKSEjPSQiMVk3KCkpKlJPPCkpISM9JCIxRCd5JD1YNF8qKSEjPSQiMU1mKXkuRG8zKiEjPSQiMTZMUmRiYkAjKiEjPSQiMSRwK3AyJ0djJCohIz0kIjF2ITNrZjs1XCohIz0kIjFiYSJmNlpkaSohIz0kIjFPR1VOd1pnKCohIz0kIjE8LSRcOjNfKikqISM9JCIyQXZWdSdRKkgrIiEjPSQiMixcJVI+cFk7NSEjPSQiMiNHX01yKlIqSDUhIz0kIjJrJ2ZIQklUVjUhIz0kIjJYcVlfMicpbzAiISM9JCIyRVcoPkYiZi4yIiEjPSQiMjA9WyJ6QCRRMyIhIz0kIjI3IiopNEpfSSg0IiEjPSQiMiJcJ1xJR3kyNiIhIz0kIjJ1UStdTF5VNyIhIz0kIjJgN15wUUN4OCIhIz0kIjJMJz0hKlF1Pl42ISM9JCIyO2dfM1xxWTsiISM9JCIyKFJMIUdhViJ5NiEjPSQiMi0yYVpmOzs+IiEjPSQiMiIzW3FZJyozMDchIz0kIjJpYWInKXBpJj03ISM9JCIyVkcxMXZOP0IiISM9JCIyRS1kRCEpM2JDIiEjPSQiMjB3MlgmPSkqZTchIz0kIjImKVxlayFcWHM3ISM9JCIxSCM0JWV6I2ZHIiEjPCQiMW4qZi4sLCUqSCIhIzwkIjJicTVCMXVHSiIhIz0kIjJMV2hVNlpqSyIhIz0kIjI5PTdpOz8pUjghIz0kIjImPkg7PUtIYDghIz0kIjJ0bDgsRm1uTyIhIz0kIjIkKVFrP0tSLVEiISM9JCIxRV4sdUJyJFIiISM8JCIyVSdlJ2ZVJj0yOSEjPSQiMkJnO3paZTFVIiEjPSQiME1uKUg6OE05ISM7JCIyI3khPT1lL3dXIiEjPSQiMm0iKW9Qang1WSIhIz0kIjJyYT5kb11YWiIhIz0kIjJfR3F3dEIhKVsiISM9JCIyTC1AJyp5J1wsOiEjPSQiMjZ3cjolKXBcXiIhIz0kIjIlKlxBTipHV0c6ISM9JCIydkJ0YSVmIj5hIiEjPSQiMmAoUlUoKiopUWI6ISM9JCIxMVpQXD8nKW86ISM8JCIyVVdEODVOQmUiISM9JCIxIz13SzozZWYiISM8JCIyLyNwQTA3RzQ7ISM9JCIyI2V3PGRVdkE7ISM9JCIyalJHIjR0QU87ISM9JCIyVzh6NU8rKFw7ISM9JCIyYCcpSElUdEptIiEjPSQiMk1nISlcWVltbiIhIz0kIjFUOCRwXj4scCIhIzwkIjIjej8pKW9EZi48ISM9JCIxPEckM2lscXIiISM8JCIyYmIkeXMnUTB0IiEjPSQiMktITVpzNlN1IiEjPSQiMUNdb3daW2Q8ISM8JCIxaWRqR3kmNHgiISM8JCIyJypcJ2UhKTNWJXkiISM9JCIyJVFzYEtSIXp6IiEjPSQiMXd6WyUpcFA2PSEjPCQiMlZyUWsuXVsjPSEjPSQiMkNYKlEpM0IkUT0hIz0kIjIwPlMuOSd6Xj0hIz0kIjI4IzRIIz5wXyc9ISM9JCIxZjtDV0F1eT0hIzwkIjJzUiM+J0g6QSo9ISM9JCIyYDhWIlskKW8wPiEjPSQiMk0oUTQrOTs+PiEjPSQiMjdoVz9YTUUkPiEjPSQiMiRcYCpSXTJoJT4hIz0kIjAzWWZiIWVmPiEjOyQiMT1vKnlnYEkoPiEjPCQiMWN2JSlmbV8nKT4hIzwkIjJRSCl6NigqKioqKj4hIz0kIjJCLlxQd3NNLCMhIz0kIjIveCpwOmUlcC0jISM9JCIyJjMwbG4pPS8vIyEjPSQiMVI3Zz4+KlEwIyEjPCQiMm4oPmJyXE9uPyEjPSQiMl9yLU4tUTMzIyEjPSQiMWBNWHY1SiU0IyEjPCQiMjk+L3U3JXkyQCEjPSQiMiNIXE56ckRAQCEjPSQiMnRtMDhCSVo4IyEjPSQiMSlSY0tHLiNbQCEjPCQiMU9yP05qbmhAISM8JCIyVih5OihRXF48IyEjPSQiMTcnMyJSQ2kpPSMhIzwkIjItTmY1XCY0LUEhIz0kIjIkKTM1SWFvYkAjISM9JCIyayMzJ1xmVCFIQSEjPSQiMWQ6InBrOURDIyEjPCQiMlpIaSkpcCgpZkQjISM9JCIyRy44M3ZnJXBBISM9JCIxclB3LVEkSEcjISM8JCIyJTRYcmFvUydIIyEjPSQiMVpfbTEqeik0QiEjPCQiMmApZmhlSE5CQiEjPSQiMTtuYzVnI29MIyEjPCQiMk5YPEQxKkhdQiEjPSQiMkI+b1c2c1BPIyEjPSQiMihIKj1rO1hzUCMhIz0kIjIjbydwJD0jPTJSIyEjPSQiMm5TPy5GIj4vQyEjPSQiMlc5ckFLa3dUIyEjPSQiMkQpPUF1dDhKQyEjPSQiMThFPEUvaFdDISM8JCIxXkw3eU0zZUMhIzwkIjEqM3UrYGM6WiMhIzwkIjJ0I1stI2VIXVsjISM9JCIxbGIoUmotJilcIyEjPCQiMktJRWZvdj5eIyEjPSQiMVRxKHl0W2FfIyEjPCQiMj14RikqeUAqUUQhIz0kIjInNCZ5PCVbUl9EISM9JCIxWyNIUCp5J2VjIyEjPCQiMmUpKnpjJTRNekQhIz0kIjJWc0l3KlIiR2YjISM9JCIxaTllXHFHMUUhIzwkIjIpKj5LOjVnKD5FISM9JCIxSkhbYEpCTEUhIzwkIjIlcE9WMGlxWUUhIz0kIjJsUyVRZCN6LG0jISM9JCIxWF5MNEJsdEUhIzwkIjJNKWVHaGA3KG8jISM9JCIyN2lPS1QpZitGISM9JCIyJGZ0PWw5MjlGISM9JCIyKSozUXJeV3ZzIyEjPSQiMUcpKTNwdixURiEjPCQiMW0mUjVpIVxhRiEjPCQiMlhJISpIbmp6dyMhIz0kIjFVNSVcc085eSMhIzwkIjB5IipveDRceiMhIzskIjImPUQlKUdHUTNHISM9JCIxXEt6ISllJj0jRyEjPCQiMm4pUnVLKkdgJEchIz0kIjJfcyVwJSk+ISlbRyEjPSQiMkFZWG0udkEnRyEjPSQiMjI/J2YpM1tkKEchIz0kIjImUnBhUzZBKilHISM9JCIxeHdcIz4lcC1IISM8JCIydVNbV0NuaCJIISM9JCIxWSIqUidIUydISCEjPCQiMk8pKVwkW0w2VkghIz0kIjFBMUkra2VjSCEjPCQiMi1PXkFYZisoSCEjPSQiMnc0LVVdS04pSCEjPSQiMU9HOmNiKygqSCEjPCQiMW5ONTMneS8sJCEjPCQiMmFJYSttXlItJCEjPSQiMkQvMD9yQ3UuJCEjPSQiMSJ5YlJ3KCozMCQhIzwkIjIkPWwhZiIzUGtJISM9JCIxZHMmeSdRJXkyJCEjPCQiMmMqeiEpPnBKIjQkISM9JCIxRShlPCgqKnkvSiEjPCQiMWolNFAtaiM9SiEjPCQiMS0tbXZndEpKISM8JCIwJTRoRiI0XzkkISM7JCIydm5oJnpAb2VKISM9JCIxO0NeSl86c0ohIzwkIjFhSlkkR0djPSQhIzwkIjJEKlFUTjg1Kj4kISM9JCIxQllPKFF1REAkISM8JCIxaGBKUnUvRUshIzwkIjImKTRtN1w/JlJLISM9JCIybSRvQFZOKkhEJCEjPSQiMmJkbl5mbWtFJCEjPSQiMTgkPXJrUip6SyEjPCQiMV8hcCEqcDdNSCQhIzwkIjEjeT41diYpb0kkISM8JCIxPjAoSCEpZS5LJCEjPCQiMiVlNyNcJj0kUUwkISM9JCIxJyo+KG8hXElaTCEjPCQiMU1GIyllenhnTCEjPCQiMXNNeDU1RHVMISM8JCIwQENGMUN4USQhIzskIjIxJVxuOXI+LE0hIz0kIjF6Y2ltLG45TSEjPCQiMTxrZD1LOUdNISM8JCIxYXJfcWloVE0hIzwkIjEkKnlaQSQqM2JNISM8JCIxSidHV1BpJm9NISM8JCIyJ28kempVTj9bJCEjPSQiMSo0SSR5JTNiXCQhIzwkIjFRM0dJOikqM04hIzwkIjF3OkIjZWFDXyQhIzwkIjE5Qj1NdyNmYCQhIzwkIjI6MExobyslXE4hIz0kIjB6JDNRUChHYyQhIzskIjImR1guIXpZamQkISM9JCIxZl8pPiUpPikqZSQhIzwkIjEoKmYkUipHSC5PISM8JCIyWHQnKWUlZnc7TyEjPSQiMkVaUHkqKlEtaiQhIz0kIjI5QCl5XD9yVk8hIz0kIjFcKlE8NSY9ZE8hIzwkIjEobypvYCJlMW4kISM8JCIydVRTYz9KVG8kISM9JCIyYjoiZmRVZyhwJCEjPSQiMSUqPWE0dDI2UCEjPCQiMUtFXGguYkNQISM8JCIwUFZNVEIhUVAhIzskIjEyVFJsa1xeUCEjPCQiMVpbTTwmcFx3JCEjPCQiMk5lJkhwRFd5UCEjPSQiMTpqQ0BjIj56JCEjPCQiMWBxPnQnKVEwUSEjPCQiMHpaXnNoKT1RISM7JCIxSCYpNHhaTEtRISM8JCIxbiNcIUh5IWUlUSEjPCQiMTArKyIpM0dmUSEjPCQiMVYyJkgkUnZzUSEjPCQiMXQ5IVwpcEEnKVEhIzwkIjE3QSZvLisoKipRISM8JCIwJkghKSkzdEoiUiEjOyQiMnZvYDI5WW0jUiEjPSQiMmNVL0Y+PiwlUiEjPSQiMWtebFdBZmBSISM8JCIyRCFmZydIbHEnUiEjPSQiMUxtYlskUTApUiEjPCQiMi9QMjBTNlMqUiEjPSQiMiYzImVDWCVbMlMhIz0kIjFaKTNXXWQ0LSUhIzwkIjEmZWZqYklXLiUhIzwkIjFCLkozTyF6LyUhIzwkIjFpNUVnbVBoUyEjPCQiMjp6NkFyXFsyJSEjPSQiMidIRDtrRkspMyUhIz0kIjFvSzY7ZXosVCEjPCQiMTBTMW8pb182JSEjPCQiMVdaLD8+dUdUISM8JCIxI1tsPihcQFVUISM8JCIwQTtSLSlvYlQhIzskIjIxJnAnZTJoInBUISM9JCIxKm88eTdNRT0lISM8JCIxRSVvKHpyNSc+JSEjPCQiMWwiPjxCIWU0VSEjPCQiMS4qcE9HYElBJSEjPCQiMjBrP2NMRWxCJSEjPSQiMid5OGQoUSoqKlxVISM9JCIxNEBfUkNaalUhIzwkIjInW0daIlxYcEYlISM9JCIxJmVCTWE9L0glISM8JCIxQ1ZQJmYiKlFJJSEjPCQiMWhdS1pZTzxWISM8JCIyJyp6diMqcFAzTCUhIz0kIjImUWxBXjJKV1YhIz0kIjFwczwuUXlkViEjPCQiMmsrR14mb0RyViEjPSQiMlh1eXEhKkhaUSUhIz0kIjJFW0ghZkg/KVIlISM9JCIxQC0pNCx3O1QlISM8JCIxZjQkSDFcXlUlISM8JCIxJ3AiKVs2QSdRVyEjPCQiMUZDJG87JjRfVyEjPCQiMWxKeT0jb2JZJSEjPCQiMS9SdHE3L3pXISM8JCIxVFlvQVZeI1wlISM8JCIwUU5ZUCgpZl0lISM7JCIxPGhlRS9ZPlghIzwkIjFjb2B5TSRIYCUhIzwkIjElZihbSWxTWVghIzwkIjFEJFFDZXopZlghIzwkIjFpISpRTUVOdFghIzwkIi8pUmpvRG9lJSEjOiQiMVIwSFEoKUgrWSEjPCQiMmtGVC16clBoJSEjPSQiMTo/PlVbQ0ZZISM8JCIxYEY5JSp5clNZISM8JCIxJFskNFk0PmFZISM8JCIxQFUvKSpSbW5ZISM8JCIyJWZcKipccTgibyUhIz0kIjJ2cFg+NTVZcCUhIz0kIjJjVicqUTokMzNaISM9JCIxdXIlZT9jOnMlISM8JCIxNnp6ZCNIXXQlISM8JCIxVidbKDRCXVtaISM8JCIyL1EqcGhgKD53JSEjPSQiMiY9LGw4JVtheCUhIz0kIjFjM2dsOSMqKXklISM8JCIyYWZedl4lUi1bISM9JCIxS0JdcHYnZSJbISM8JCIwMmA5aVMkSFshIzskIjEsUVN0TyJHJVshIzwkIjBhYWBzJ0djWyEjOyQiMXlfSXgoZihwWyEjPCQiMTpnREhHQiQpWyEjPCQiMWFuPyIpZXEnKlshIzwkIjEjXGRKJCp5LCJcISM8JCIyJUgjM14pPmxCXCEjPSQiMCcqZXEuRHIkXCEjOyQiMShwNCEqMylmXVwhIzwkIjFPLyc0OXJTJ1whIzwkIjF2NiJIPld2KFwhIzwkIjE3PidbQzw1KlwhIzwkIjFeRSJvSCFcL10hIzwkIjEqUWooW0wneiwmISM8JCIxPlRyK2tWSl0hIzwkIjJsJlttXyU0XC8mISM9JCIxJ2Y6WV0jUWVdISM8JCIxTWpjY2ImPTImISM8JCIyOjI8JjMnR2AzJiEjPSQiMCJ5WWc7ISkpNCYhIzskIjFaJj1DcnVBNiYhIzwkIjEnR3BWd1pkNyYhIzwkIjE7K0s7M0FSXiEjPCQiMlh2cSNvUXBfXiEjPSQiMkVcQC0jcDttXiEjPSQiMEJzQCgqUid6XiEjOyQiMW9IN0NJNiQ+JiEjPCQiMTJQMndnZTFfISM8JCIxWFctRyJmK0EmISM8JCIyYjx2KnpAYExfISM9JCIxOGYjPkIwcUMmISM8JCIxXm0oUUd5L0UmISM8JCIwUkZlTF5SRiYhIzskIjJtN3l4UUN1RyYhIz0kIjJhJylHKFJ1KjNJJiEjPSQiMk5nejtccVZKJiEjPSQiMmFMSU9hVnlLJiEjPSQiMXQ1ZSZmOzhNJiEjPCQiMiY0PWBaJyp5YWAhIz0kIjFbRFsqcGkjb2AhIzwkIjJrR0w5dk48USYhIz0kIjJYLSVRLikzX1ImISM9JCIxalpMYj1vM2EhIzwkIjElXCZHMlw6QWEhIzwkIjFKaUJmemlOYSEjPCQiMiVwcD02NTVcYSEjPSQiMnZxUEoxdURZJiEjPSQiMVklKTM6ci93YSEjPCQiMSQ9UnE7PyYqWyYhIzwkIjIvIyoqKSo9SypIXSYhIz0kIjFfMSU0Rm1rXiYhIzwkIjIvUiIqR0tSKkhiISM9JCIxR0AlW1A3TWEmISM8JCIxbUd6RWEpb2ImISM8JCIxME91eSVlLmQmISM8JCIxVlZwSTokUWUmISM8JCIwM1hFZS90ZiYhIzskIjE2ZWZNd3g1YyEjPCQiMVxsYSdvXVVpJiEjPCQiMSlHKFxRUHNQYyEjPCQiMUUhWy96Jz5eYyEjPCQiMWsoKVJVKXBZbSYhIzwkIjEsJlxWKkc5eWMhIzwkIjFSLUlZZmgicCYhIzwkIjAoNEQpKiopMzBkISM7JCIxNDw/XT9jPWQhIzwkIjFaQzotXi5LZCEjPCQiMSU9LlQ6M2J1JiEjPCQiMUFSMDE3KSplZCEjPCQiMWhZK2VVWHNkISM8JCIxKVJiKjR0I2Z5JiEjPCQiMiVHaCE+TyslKnomISM9JCIxbm8mUVR0RyJlISM8JCIxMHchZVlZaiNlISM8JCIxVyRleF4+KVJlISM8JCIxIjM0KHBESGBlISM8JCIyJz4pZjtpbG4nZSEjPSQiMWUwaHQnUS0pZSEjPCQiMSdIaGJzNlAqZSEjPCQiMUU/XnhaPTJmISM8JCIxa0ZZSHlsP2YhIzwkIjJFXTg5KTM4TWYhIz0kIjFSVU9MUmdaZiEjPCQiMXlcSiYpcDJoZiEjPCQiMndybHMuXVgoZiEjPSQiMWFrQCozQiEpKWYhIzwkIjEmPW42OSdcLGchIzwkIjFBejYkPnBcLCchIzwkIjFpJ29dQ1UlR2chIzwkIjEqUj5xSDo+LychIzwkIjFQLCgqWyQpUWJnISM8JCIxdjMjNFNoKW9nISM8JCIxOTsoR1hNQjMnISM8JCIxVkIjW10yZTQnISM8JCIxIzN0bmIhRzRoISM8JCIyJj5RczNPdkFoISM9JCIxZlhuZ21BT2ghIzwkIjEoSERFcipwXGghIzwkIjJYLndYd3NKOychIz0kIjJFeEVsImVrd2ghIz0kIjEudlpvKT0sPichIzwkIjIwQ0cvIz5mLmkhIz0kIjIneSp5QihcMTxpISM9JCIxPShIVi1RMEInISM8JCIyY1ghR3c1LFdpISM9JCIxJD5KI0dUW2RpISM8JCIxSj49IT1kNEYnISM8JCIxaUU4Sy1WJUcnISM8JCIvTTMlRy56SCchIzokIjFSVC5PalA2aiEjPCQiMXZbKXpRXFtLJyEjPCQiMTpjJCpSQ0tRaiEjPCQiMWBqKT1cJnpeaiEjPCQiMDRQUWFvX08nISM7JCIwI3l5JmZUKHlqISM7JCIxZiZReGs5QVInISM8JCIxKUgqbypwKG8wayEjPCQiMU4ra14yOz5rISM8JCIxdDJmLlFqS2shIzwkIjE2OmFibzVZayEjPCQiMEQjXDIqeiZmayEjOyQiMSkpSFdmSDB0ayEjPCQiMT5QUjZnXydbJyEjPCQiMWRXTWohKioqKlwnISM8JCIxJT4mSDpAWjhsISM8JCIxS2ZDbl4lcF8nISM8JCIwbic+PiM9L2EnISM7JCIxNHU5cjcqUWInISM8JCIxWSIpNEJWT25sISM8JCIxdylbXVBQM2UnISM8JCIxOicqKnBVNVZmJyEjPCQiMWAuJip5TXkybSEjPCQiMDQsNGBjN2knISM7JCIwJD0mR2VIWmonISM7JCIxb0QhW2otI1ttISM8JCIxMUx2J292O20nISM8JCIxT1NxUShbXm4nISM8JCIxdVpsIXpAJylvJyEjPCQiMTdiZ1VbNC1uISM8JCIwRGNYKnljOm4hIzskIjEpKXBdWTQvSG4hIzwkIjFFeFgpKlJeVW4hIzwkIjFrJTMvMCgpZnYnISM8JCIxJT5mQjVnJXBuISM8JCIxSyo0VjpMSHknISM8JCIxczFFMWlTJ3onISM8JCIwVDYjZSN6KTRvISM7JCIxWkA7NUJOQm8hIzwkIjEnKUc2aWAjbyRvISM8JCIxQ08xOSUpSF1vISM8JCIxYVYsbTl4am8hIzwkIjA0bHpeV3MobyEjOyQiMCRlIipwdnIhKm8hIzskIjFvbCc9aSE+L3AhIzwkIjExdCJRbmp3InAhIzwkIjFWIW9kc082JHAhIzwkIjEkeT14eDRZJXAhIzwkIjE3JnAnSEczZXAhIzwkIjBEPzspZWJycCEjOyQiMSopNGRMKkddKXAhIzwkIjFHPF8mKT5dKSpwISM8JCIxbENaUF0oPiwoISM8JCIxLUtVKjNbYS0oISM8JCIxVFJQVDYjKlFxISM8JCIxc1lLJD4lUl9xISM8JCIwVHZfQ25lMSghIzskIjFaaEEoSFMkenEhIzwkIjEoKW88XEwiRzQoISM8JCIxRHc3LGtHMXIhIzwkIjFoJHlJWGYoPnIhIzwkIi8iSF1dS0s4KCEjOiQiMUopenBiMG45KCEjPCQiMXAwJCozJ3ksOyghIzwkIjEyOCkzbV5PPCghIzwkIjFYPyRHckNyPSghIzwkIjEkeSN5a3hmK3MhIzwkIjFATnQ7MzI5cyEjPCQiMEUlb29RYUZzISM7JCIxKSpcaj9wLFRzISM8JCIxSGRlcyoqW2FzISM8JCIxbGtgQ0knekUoISM8JCIxL3Nbd2dWIkcoISM8JCIxVXpWRyI0XEgoISM8JCIxIm8pUSE9I1EzdCEjPCQiMT0lUkJCYj1LKCEjPCQiMWMsSCVHR2BMKCEjPCQiMScpM0NPOCEpW3QhIzwkIjFEOz4pUXVBTyghIzwkIjFpQjlTdXV2dCEjPCQiMSxKNCNcPyMqUSghIzwkIjAlUS9XTnAtdSEjOyQiMXlYKmZmbWhUKCEjPCQiMTlgJXprUidIdSEjPCQiMVlnKikqcDdKVyghIzwkIjEleVk9diZlY3UhIzwkIjE6dnouKWUrWighIzw3YGpsJCIxIlxnXD8hSCJwKCEjPSQiMCQpeipwMyxJeSEjPCQiMW8iKipcYEoob3ohIz0kIjExJj0rP191NSkhIz0kIjFveC5sRzxZIykhIz0kIjEycjBJTipbUSkhIz0kIjFYazImPjlPXykhIz0kIjEmeSY0Z1tMaScpISM9JCIxQV42RGIwLCkpISM9JCIwWU0sPncoUiopISM8JCIvUTpib1x5ISohIzskIjFQSjw/dkA8IyohIz0kIjEqUiM+Jj1RZk4qISM9JCIxUDxAXSllWVwqISM9JCIxdTVCOiZ6TGoqISM9JCIxOS9EIT0rQHgqISM9JCIxYChwXyUzIzMiKiohIz0kIjE0Kkc1OmFcKyIhIzwkIjFWM2A8aSMpPTUhIzwkIjIicEYuJUcpcEs1ISM9JCIxLlpgXS5kWTUhIzwkIjJvak9xVFUvMSIhIz0kIjIxZFFOWzlWMiIhIz0kIjJYXVMrYic9KTMiISM9JCIyJFFDYTsnZT81IiEjPSQiMkFQV0lvSWY2IiEjPSQiMiMpSFkmXEYhKUg2ISM9JCIxSyNbZyJbblY2ISM8JCIyaTtdRClvYWQ2ISM9JCIyKio0XyFcKj05PCIhIz0kIjJQLmFiLCJIJj0iISM9JCIydidmMCMzaiIqPiIhIz0kIjI7IXpiW14uODchIz0kIjJ3IylmXUAycEEiISM9JCIyOXdoOkd6MkMiISM9JCIyYHBqIVs4bGE3ISM9JCIyIkhjYzlNX283ISM9JCIySmNuNVsmUiNHIiEjPSQiMShccHZhbmlIIiEjPCQiMjFWclNoUixKIiEjPSQiMm9OdDBvNlNLIiEjPSQiMjBIdnF1JCl5TCIhIz0kIjJYQXhOImV2XjghIz0kIjIiZSJ6Kyl5aWw4ISM9JCIxIzQiZVkqKlx6OCEjPCQiMUVJMzg/UCRSIiEjPCQiMihmXGV6U0MyOSEjPSQiMmYpbzNZaDZAOSEjPSQiMio+KSllNyMpKVxWIiEjPSQiMk52ITR6LScpWzkhIz0kIjJ1byNmWEJ0aTkhIz0kIjFAWTQ3V2d3OSEjPCQiMWJsZnlrWiFcIiEjPCQiMSpbKTRYJltWXSIhIzwkIjJgVCs7aD8jPTohIz0kIjFcQjV5RTRLOiEjPCQiMSRHL1l1a2ZhIiEjPCQiMm9AMTYibyQpZjohIz0kIjIzOjN3KCkzUGQiISM9JCIyVzM1VCU0ZShlIiEjPSQiMT0/aDVJWCw7ISM8JCIyWCVSNnhdSzo7ISM9JCIyJnllaFZyPkg7ISM9JCIxN3k2NSNwSWsiISM8JCIxWSg+bUZUcGwiISM8JCIwb0BKTTgzbiIhIzskIjJOaEInNGFvJW8iISM9JCIxWmI3d3ViKXAiISM8JCIxdXVpVSZIQ3IiISM8JCIyd1NIIjQ7SUU8ISM9JCIyN01KY250LHUiISM9JCIxdks4VWQvYTwhIzwkIjE0X2ozeSJ6dyIhIzwkIjFWcjh2KSp5InkiISM8JCIybTJSOyU+bSZ6IiEjPSQiMkUrVCIzU2A0PSEjPSQiMm0kSGt1Z1NCPSEjPSQiMi4oWzlUInlzJD0hIz0kIjJWIW9rMi06Xj0hIz0kIjFRKFtURkFdJz0hIzwkIjFzMWxTViopeT0hIzwkIjExRToya3cjKj0hIzwkIjInUlhsdCVRbSE+ISM9JCIxbWs6UzBePz4hIzwkIjIoKlJlbWcjUU0+ISM9JCIyUExnSm5hI1s+ISM9JCIydEVpJ1JuN2k+ISM9JCIyOT9raCEpKSpmKD4hIz0kIjFOaG1zMygpKik+ISM8JCIyJXAhbyJSSHUuPyEjPSQiMSYqKnBjKzp3LCMhIzwkIjIoRz48c3FbSj8hIz0kIjJGJ1FuUSJmYC8jISM9JCIybnp2Xj9KI2Y/ISM9JCIyM3R4O0YuSjIjISM9JCIyV216IlFgKHAzIyEjPSQiMSlmIm8vdSUzNSMhIzwkIjFDTj1yJT5aNiMhIzwkIjFlYW9QOmZHQCEjPCQiMSNSKD0vT1lVQCEjPCQiMmVLKm9xY0xjQCEjPSQiMilmNz5QeD9xQCEjPSQiMk4+JHAuKXpTPSMhIz0kIjFGXj5xPSZ6PiMhIzwkIjJOMChwT1IjPUAjISM9JCIydikqKT4uZ3BEQSEjPSQiMjcjNHFwIW8mUkEhIz0kIjFiRz9PLFdgQSEjPCQiMiYpeS9GPzd0RSMhIz0kIjFCbj9wVT0iRyMhIzwkIjFkJzNkTGNdSCMhIzwkIjEkZTVBU0cqM0IhIzwkIjJtXjcoby8hR0sjISM9JCIyMVg5X2BzbUwjISM9JCIyWVE7PGdXME4jISM9JCIxPSQ9I29tVGtCISM8JCIxXy1zTSgpR3lCISM8JCIyYz1BNyEzOyNSIyEjPSQiMkI2Q3gnRy4xQyEjPSQiMmMvRVUkXCEqPkMhIz0kIjInenpzK3F4TEMhIz0kIjJMIipIczFcd1cjISM9JCIydCU9dEw2X2hDISM9JCIyOHlMLT8kUnZDISM9JCIxOmR0bV9FKlsjISM8JCIxXHdCTHQ4LkQhIzwkIjF2JlIoKlI0cV4jISM8JCIxNDpDbTkpM2AjISM8JCIyQ1dWRmBgWmEjISM9JCIya1BYIypmRCdlRCEjPSQiMEpaZG0oXHNEISM7JCIyV0NcQXRwamUjISM9JCIxeTZ2KXpULWcjISM8JCIxL0pEbFE2OUUhIzwkIjFRXXZKZil6aSMhIzwkIjFzcEQpKnomPWsjISM8JCIyZSEqZVoxSWRsIyEjPSQiMilSM0VKQGdwRSEjPSQiMlF4aXg+dU1vIyEjPSQiMTJaRWtpTShwIyEjPCQiMUxtd0kkPTdyIyEjPCQiMW4mb3NSITRERiEjPCQiMjNdcVBZaSpRRiEjPSQiMltWcy1gTUd2IyEjPSQiMXBWeCdmMW53IyEjPCQiMS1qRmoneTB5IyEjPCQiMU8jeShIMlgleiMhIzwkIjFqLEcnekEkM0chIzwkIjEoNCN5aVs+QUchIzwkIjItLiVHSHAxT0chIz0kIjJVJ2Z5JioqUSpcRyEjPSQiMiMpKnlHaTUiUSdHISM9JCIyRSQpKnlHSm94RyEjPSQiMm13IkgmPmI6KkchIz0kIjEjcCR6aHNVMEghIzwkIjFFY0hHJCpIPkghIzwkIjBjKHolUnJKJEghIzskIjJPXCpIaE0vWkghIz0kIjJ3VSx5Xzo0J0ghIz0kIjI7Ty5WZih5dUghIz0kIjEmSDAzbWYnKSlIISM8JCIxQHNJRjxgLUkhIzwkIjFiIjRRei5rLCQhIzwkIjEqMzYuJ2VGSUkhIzwkIjJGLThvI3o5V0khIz0kIjJuJlxKJCoqPiFlSSEjPSQiMCpvIilmPyo9MiQhIzskIjFDKT1qN2tkMyQhIzwkIjIvdj9HPk8nKjQkISM9JCIyV29BJGYjM042JCEjPSQiMT1ZI2VLIVFGSiEjPCQiMkNiRUJSXzc5JCEjPSQiMSdbRyllVzdiSiEjPCQiMFVJYF8nKipvSiEjOyQiMWFCJD1mb0c9JCEjPCQiMEdNJGUxdSc+JCEjOyQiMk5AT1tzNzFAJCEjPSQiMnY5UTh6JVtDSyEjPSQiMSIzU3kmb05RSyEjPCQiMTo/TUMqR0FEJCEjPCQiMVxSJTMqNDVtSyEjPCQiMSMpZU1kSSgqekshIzwkIjE7eSVRN1hRSCQhIzwkIjJEdVwuPjx4SSQhIz0kIjJsbl5vRCplQEwhIz0kIjBoYExLaGFMJCEjOyQiMVdiJikqUUwkXEwhIzwkIjF5dU5jYT9qTCEjPCQiMTclZkdfeHFQJCEjPCQiMVk4TyplXDRSJCEjPCQiMjtGamVsQFtTJCEjPSQiMmM/bEJzJHA9TSEjPSQiMidScicpKXlsRFYkISM9JCIxdCFwYCZ5VllNISM8JCIxMjUoPSMqNC5ZJCEjPCQiMVRIUCkpPj11TSEjPCQiMXVbKFswYSEpWyQhIzwkIjIxIW9QQGgjPl0kISM9JCIyWXR5eT0pejpOISM9JCIyJ28xUWEtbkhOISM9JCIxLUUpM0tVTmEkISM8JCIxT1hRKFE5dWIkISM8JCIwWicpUVgnR3JOISM7JCIxLyUpUT8mZV5lJCEjPCQiMi9MISpvZUkhKmYkISM9JCIyV0UjUmBFIUhoJCEjPSQiMSk+JSopPlp4RU8hIzwkIjFLaFIneVkxayQhIzwkIjFtISkqRyYpPVhsJCEjPCQiLCU+NFJvTyEjNyQiMU0+IWYpSEUjbyQhIzwkIjIlZlFTX104J3AkISM9JCIyTXowKj1yKzVQISM9JCIydXMyYT16UXMkISM9JCIxaCc0PkReeHQkISM8JCIxJmY2JT1MaV5QISM8JCIxSE4iXFEmXGxQISM8JCIxamFUXnVPelAhIzwkIjImKVE8el5SS3okISM9JCIyREs+V2U2ciFRISM9JCIybERANGwkKTQjUSEjPSQiMD5CdXJiWyRRISM7JCIxQ14jUnlGKFtRISM8JCIxZXFVXSkqZmlRISM8JCIxIyoqR3AiPlp3USEjPCQiMUU0ViQpUk0hKlEhIzwkIjI6JkckKlxnQC9SISM9JCIyY3lNazYpMz1SISM9JCIyJz5uJEg9Zz4kUiEjPSQiMk9sUSVcQSRlJVIhIz0kIjJ3ZVNmSi8oZlIhIz0kIjI7X1VDUXdOKFIhIz0kIjFiVyUqWyVbdSlSISM8JCIyMVFZYV4/OCslISM9JCIyWUpbPmUjPjpTISM9JCIyJ1stWFtZMUhTISM9JCIyRT1fXHJPSC8lISM9JCIybTZhOXkzbzAlISM9JCIwMGN6JTNvcVMhIzskIjElKXpYOUhiJTMlISM8JCIwIipmNClcVSk0JSEjOyQiMlclPVlacUg3VCEjPSQiMXlQJ1I2cGg3JSEjPCQiMTdkWSE9VCs5JSEjPCQiMVl3J3BDOFI6JSEjPCQiMGVwTUomeW5UISM7JCIxOTooKnp0bCI9JSEjPCQiMiVSTVpZJUhiPiUhIz0kIjJNUHZIXiwlNFUhIz0kIjJ1SXglek5GQlUhIz0kIjFUI3pma1hyQiUhIzwkIjF2Nls3eCxeVSEjPCQiMTRKKSp5KCopW0UlISM8JCIxVV1bWD13eVUhIzwkIjIlb3ApPiJSaiNIJSEjPSQiMkQhKilbeWZdMVYhIz0kIjFQMypcL3kuSyUhIzwkIjB4I1w2LERNViEjOyQiMlhxJSp6PEEiW1YhIz0kIjFRbVxXVSo+TyUhIzwkIjFzJikqNEptZVAlISM8JCIxKVwrdlBRKCpRJSEjPCQiMUtDK1cvaC5XISM8JCIyYk8vMF4jWzxXISM9JCIvait4WE5KVyEjOiQiMk5CM05rRV9XJSEjPSQiMnc7NStyKTRmVyEjPSQiMjs1N2x4cUhaJSEjPSQiMUZTLFZHJW9bJSEjPCQiMWhmXjRccitYISM8JCIxJip5LHdwZTlYISM8JCIyJ0cpPkQvZiVHWCEjPSQiMkV3QCE0NkxVWCEjPSQiMm1wQmI8LmliJSEjPSQiMUhjLVVfMnFYISM8JCIyY2JGJjN0JVJlJSEjPSQiMicqW0hdUD55ZiUhIz0kIjJPVUo6VyJwNlkhIz0kIjJ3TkwhM05jRFkhIz0kIjI8SE5YZE4lUlkhIz0kIjFEcy5Ud0lgWSEjPCQiMWYiUnZxenJtJSEjPCQiMSQ0VFN4XjVvJSEjPCQiMC1WMCVRI1xwJSEjOyQiMk0mXC8yZnozWiEjPSQiMnUpb2F0em1BWiEjPSQiMCMpWysvU2x0JSEjOyQiMmF2XWw1Ny92JSEjPSQiMiUqb19JPCVHa1ohIz0kIjFBWWJSaTp5WiEjPCQiMiVbbDAxJEc/eiUhIz0kIjJDW2VEUCtmIVshIz0kIjJrVGchUkN4PlshIz0kIjIwTmliXVdPJFshIz0kIjJYR2s/ZDt2JVshIz0kIjE8aWNRJylRaFshIzwkIjFfIm9dcWdfKFshIzwkIjF6K2RyRjgqKVshIzwkIjI6LHMhUVsrLlwhIz0kIjJiJVJkL3AobyJcISM9JCIxemUycipbMiRcISM8JCIxOXlkUDVpV1whIzwkIjFaKHpTNSRcZVwhIzwkIjEibyJlcV5Pc1whIzwkIjEyTzNQc0InKVwhIzwkIjFUYmUuJDQsKyYhIzwkIjF2dTNxOClSLCYhIzwkIjEzJSplT00meS0mISM8JCIxVjg0LmJzVF0hIzwkIjF3S2ZwdmZiXSEjPCQiMjFAJjRPJ3AlcF0hIz0kIjJjOChmLTxNJDMmISM9JCIyJ3AhKjRwUEAoNCYhIz0kIjEwNWdOZTM2XiEjPCQiMnckSDUteiZcNyYhIz0kIjI7KFtnbypIKVFeISM9JCIyYyFvNU4/cV9eISM9JCIyJ1IoMzs1dWw7JiEjPSQiMW0xNm9oVyE9JiEjPCQiMicpZjdZQj1WPiYhIz0kIjFNWDYsLj4zXyEjPCQiMW5raG5CMUFfISM8JCIxLCU9VFZNZkImISM8JCIxTi5pK2whKVxfISM8JCIxcEE3biZ5T0UmISM8JCIxLVVpTDFieF8hIzwkIjFHaDcrRlUiSCYhIzwkIjFpIUdtdyVIMGAhIzwkIjEnKipISiRvOz5gISM8JCIwJD5qKiopUUlMJiEjOyQiMWpROG00InBNJiEjPCQiMSl6TkUuJHlnYCEjPCQiMUp4OCo0YllQJiEjPCQiMnVsUmM7RiYpUSYhIz0kIjI6ZlRAQipSLWEhIz0kIjJiX1YnKUhyaVQmISM9JCIyJmZhOWxMOUlhISM9JCIxI1JaO1Y6U1cmISM8JCIxRSRcIilcKCl5WCYhIzwkIjBFXlljZjxaJiEjOyQiMSg9YDZqSmNbJiEjPCQiMjA3YndwLiYqXCYhIz0kIjFgcTprZFA4YiEjPCQiMiYpKSplMSR5Q0ZiISM9JCIyRCM0OygqKT42YSYhIz0kIjJtJkdtaj4qXGImISM9JCIxInprLC5rKW9iISM8JCIxO25tJzRPRmUmISM8JCIwbG9KOzNtZiYhIzskIjElZXEnSC1bNWMhIzwkIjE9RDwnSF9WaSYhIzwkIjFfV25pVkFRYyEjPCQiMmNRdyJIazRfYyEjPSQiMic+JHljXG9mbSYhIz0kIjFaLT1pMCUpemMhIzwkIjF6QG9HRXIkcCYhIzwkIjE4VD0mcCVlMmQhIzwkIjJtLydvaG5YQGQhIz0kIjEiKXo9RylHYHQmISM8JCIxOioqbyUqMz9cZCEjPCQiMVw9PmhIMmpkISM8JCIyV3gkcEZdJXB4JiEjPSQiMiUzZD4lNDwzeiYhIz0kIjJDayhwZyIqby9lISM9JCIxdyYqPkY3Yz1lISM8JCIxNjpxJEhMQyRlISM8JCIxV00/Z2BJWWUhIzwkIjF5YHFFdTxnZSEjPCQiMS90PyRcXFMoZSEjPCQiMVEjNChmOiN6KWUhIzwkIjFzNkBFT3osZiEjPCQiMTBKciNwbGMiZiEjPCQiMVJdQGZ4YEhmISM8JCIxdHByRCk0TSVmISM8JCIxMio9QSo9R2RmISM8JCIxTDNzZVI6cmYhIzwkIjFtRkFEZy0mKWYhIzwkIjEsWnMiNCkqKSkqZiEjPCQiMU1tQWUseDdnISM8JCIxbyZHWkFVbS0nISM8JCIxLTBCIkg5MC8nISM8JCIxT0N0ZGpRYWchIzwkIjBQTVVVZSNvZyEjOyQiMSdITzJcSUAzJyEjPCQiMEJRc2ItZzQnISM7JCIxayx1QlkoKTRoISM8JCIxKTRVLXBZUDcnISM8JCIxSlN1Yyg9dzgnISM8JCIxbWZDQjNcXmghIzwkIjEqKnl1KilHT2xoISM8JCIxRClcaSZcQnpoISM8JCIxZjx2QXE1JD4nISM8JCIxJXBgIyozenA/JyEjPCQiMUZjdmI2JjNBJyEjPCQiMGNkQUFCWkInISM7JCIxJVxmKClHJmZbaSEjPCQiMFZoX05uQ0UnISM7JCIxYkx3QCVSakYnISM8JCIxKUdsIylbNi1IJyEjPCQiMUFzd2FOMy9qISM8JCIxYyJwN2liekonISM8JCIwNHJ4b0Y9TCchIzskIjFDSUZhKCpwWGohIzwkIjFlXHg/PWRmaiEjPCQiMSYpb0YoKVFXdGohIzwkIjE8KXlQJmZKKFEnISM8JCIxXjJHPyEpPSxrISM8JCIxJm8jeSczZ11UJyEjPCQiMGklR2BAJCpHayEjOyQiMV9seT5VIUdXJyEjPCQiMSdbKUcnR3dtWCchIzwkIjE4L3pfJFswWichIzwkIjFaQkg+L1UlWychIzwkIjEiRyV6JlsjSClcJyEjPCQiMTlpSF9YOzdsISM8JCIxXCIpej1tLkVsISM8JCIxIzMrYG8zKlJsISM8JCIxPD8hPXYheWBsISM8JCIxVFJJPUdsbmwhIzwkIjF2ZSFbKVtfImUnISM8JCIwInlJXnBSJmYnISM7JCIxVyg0eSxwIzRtISM8JCIxejtKJTNUSmknISM8JCIxN08iMzo4cWonISM8JCIxWWJKPF8pM2wnISM8JCIxeXUiUUdkWm0nISM8JCIxMCU+Lk5IJ3ltISM8JCIxUjgjb1QsRHAnISM8JCIxdEtLJFt0anEnISM8JCIxMl8jKVxiQz9uISM8JCIxVHJLO3c2TW4hIzwkIjF2IUhHbyopenUnISM8JCIxMzVMXDwnPXcnISM8JCIxTUgkZSJRdHZuISM8JCIxcFtMIyllZyp5JyEjPCQiMS1vJClbeloubyEjPCQiMU8oUWAsXXQibyEjPCQiMG5TPTNBNyRvISM7JCIxL0VNW1Q0WG8hIzwkIjFPWCVbQG0qZW8hIzwkIjFqa00iR1FHKG8hIzwkIjEoUlt5TTVuKW8hIzwkIjFKLk45Q2UrcCEjPCQiMWxBJjNbYVcicCEjPCQiMSk+YXRhRSRHcCEjPCQiMUxoJlFoKT5VcCEjPCQiMW0hZS5vcWcmcCEjPCQiMSMqKmZvdVUqcHAhIzwkIjFFPk84WyJRKXAhIzwkIjFoUScpem9vKCpwISM8JCIxJXpsaiUqZTosKCEjPCQiMUV4J0csSmEtKCEjPCQiMWkncCR6SUlScSEjPCQiMSdmcmU5dkowKCEjPCQiMUJOUDdzL25xISM8JCIxYmEoKXkjPjQzKCEjPCQiMFJ4YE0ieiU0KCEjOyQiMUQkej1UaiczciEjPCQiMWY3UXlhYEFyISM8JCIxIz4kKVthMms4KCEjPCQiMUZeUTYnei06KCEjPCQiMV5xKXluXlQ7KCEjPCQiMSYpKilRV1AteXIhIzwkIjE+NCozImUqPT4oISM8JCIxYEdSeHl3MHMhIzwkIjEoeSUqUSUqUic+cyEjPCQiMHMnUjU/XkxzISM7JCIxYScpKm8yJVFacyEjPCQiMSNlK005YzdFKCEjPCQiMTpEISo0I0deRighIzwkIjFcV1N3LSsqRyghIzwkIjEjUTFITXNHSSghIzwkIjE8JDMlNFd1O3QhIzwkIjBENWZaOzFMKCEjOyQiMSU9N0NhKVtXdCEjPCQiMDY5KjMxT2V0ISM7JCIxVmdUdkVCc3QhIzwkIjF4eiI+dS9oUSghIzwkIjAiKj4lM28oKipSKCEjOyQiMVg9I1woKVtRVCghIzwkIjF5UFVUNHNGdSEjPCQiMTdkI3orJGZUdSEjPCQiMVl3VXVdWWJ1ISM8JCIxdCZINDlQJHB1ISM8JCIxMjpWMiM0S1soISM8JCIwV0xSRiIzKFwoISM7JCIxdWBWU0wmNF4oISM8JCIxM3QkcFNEW18oISM8JCIxVSNSTVoocFF2ISM8JCIxdzYlKlImcERiKCEjPCQiMSxKVzE7V212ISM8JCIxTl0lSG44LmUoISM8JCIwKHBXUmQ9JWYoISM7JCIxLipbZiF5MDN3ISM8JCIxUDNYcylIPmkoISM8JCIxckYmKlE+IWVqKCEjPCQiMTBaWDBTblx3ISM8JCIxSm0mPjJZTm0oISM8JCIxbiZlJVEiPXVuKCEjPCQiMSJcZ1w/IUgicCghIzw3YGpsJCIxQSo+VSIzOnZ5ISM9JCIxY0JYLXc9PCEpISM9JCIxInolbyFSQyNmIikhIz0kIjFFcyIqeTZFLCQpISM9JCIxI2Vccid6SFYlKSEjPSQiMTs/UWJaTCZlKSEjPSQiMFg5T2FydHMpISM8JCIxJylvJT1MMyVwKSkhIz0kIjBLeis3WDksKiEjPCQiMWE8SjM+W2AiKiEjPSQiMD5XbHA9YkgqISM8JCIxQ214JVtidlYqISM9JCIwKSozSUYjZnomKiEjPCQiMTk5Q2ghSDtzKiEjPSQiMCZRWlxlbWopKiEjPCQiMiVHMXhqLWQrNSEjPSQiMj0oUWZVUng5NSEjPSQiMl82PDlpeCpHNSEjPSQiMillLkMrOD1WNSEjPSQiMlVmaiF6XFFkNSEjPSQiMVFvKXlsKWVyNSEjPCQiMjkzNW5MI3omMyIhIz0kIjJbS0xiLCcqKio0IiEjPSQiMiNvbE4lcCo+OTYhIz0kIjI7Iil6SlAuJUc2ISM9JCIyXzAuPzAyRTkiISM9JCIyM0hFM3Q1bzoiISM9JCIyVWBcJzRXLHI2ISM9JCIyd3hzJSkzPV89IiEjPSQiMjctJ0huPFUqPiIhIz0kIjJZRT5oV0RPQCIhIz0kIjEzRCVcN0h5QSIhIzwkIjI8dmxQIUcuVTchIz0kIjJzKSopZSNbT2lEIiEjPSQiMjFCNzk7Uy9GIiEjPSQiMXVhQlNRayVHIiEjPCQiMnNyZSE+diUpKUgiISM9JCIyNic+KXk+XklKIiEjPSQiMlg/MG4oW0RGOCEjPSQiMVslR2JiZTlNIiEjPCQiMk1vXlZCaWNOIiEjPSQiMm8jXDw4ZicpcDghIz0kIjIvPCkqPmZwU1EiISM9JCIyVFRAM0Z0IylSIiEjPSQiMnVsVydccFo3OSEjPSQiMi8hellHMW9FOSEjPSQiMlU5IkgyVikzVyIhIz0kIjBROWgpejNiOSEjOyQiMk1pUFxtIkhwOSEjPSQiMW4zd1ZgXCRbIiEjPCQiMDYlZUEhKnAoXCIhIzskIjJNTjI5cS0+XiIhIz0kIjEoZkktUTFoXyIhIzwkIjIxJVEwZitKUzohIz0kIjJpMnh5dDhYYiIhIz0kIjIpPi5xO3VybzohIz0kIjFqTl8mNEBIZSIhIzwkIjJtIW9NdVo3KGYiISM9JCIwMHFKWEc4aCIhIzskIjJNSCQqPjhLYmkiISM9JCIxUGwiMyJldFI7ISM8JCIyQXhSJypbUlJsIiEjPSQiMTtJWW9KOW87ISM8JCIyJWZpR1pvTSNvIiEjPSQiMS4mNGhfXWxwIiEjPCQiMml1S1w/YTJyIiEjPSQiMikqKWZ2JCl5JlxzIiEjPSQiMk1CekRjaCJSPCEjPSQiMXBDU1RfT2A8ISM8JCIyRXJELSMqb3Z3IiEjPSQiMmUmKlshKmZzPHkiISM9JCIxKj5zeUZ3ZnoiISM8JCIyRVcmcGMqeiwiPSEjPSQiMmxvPWJqJFFDPSEjPSQiMilIPk05dGVRPSEjPSQiMmE7bEoqNHpfPSEjPSQiMiczJSkpPm4lKnAnPSEjPSQiMkFsNjNOKT4iKT0hIz0kIjJlKltqSD9TJio9ISM9JCIyJVIiZSUzZGc0PiEjPSQiMkVRIkcoUTRRIz4hIz0kIjJpaS9oMTghUT4hIz0kIjIlcHkjXHU7QSY+ISM9JCIyYTVeUFU/ayc+ISM9JCIyJ1tWZC1UaSEpPiEjPSQiMkFmKFIieUZbKj4hIz0kIjJhJDNBZzkuND8hIz0kIjF6Uy9SXkJCPyEjPCQiMkFLbnkiKVF1LiMhIz0kIjJlYyFwJ1xVOzAjISM9JCIyPSFRXnZoJWUxIyEjPSQiMlkvUFYmKVwrMyMhIz0kIjInKUdnSmBgVTQjISM9JCIyPWAkKT5AZCUzQCEjPSQiMmF4MTMqM21BQCEjPSQiMT4ranBYJ284IyEjPCQiMkFFYCVbI281OiMhIz0kIjJ2XHdzIz5GbEAhIz0kIjI5dSo0MWNaekAhIz0kIjEmKUgjXEd6Tz4jISM8JCIyI0dpdWpIKXk/IyEjPSQiMj1acERrJzNBQSEjPSQiMTpGUkAuSE9BISM8JCIxZmZAK1NcXUEhIzwkIjJVPlIhendwa0EhIz0kIjJ5Vml5TiwqeUEhIz0kIjEibyZvT101JEgjISM8JCIyWSMqM2JyM3RJIyEjPSQiMiNvQEwlUjc6SyMhIz0kIjI9VGJKMjtkTCMhIz0kIjJabHk+dj4qXEIhIz0kIjEiKj0hM1ZCVE8jISM8JCIxTV5pNHJLeUIhIzwkIjJ5UFslKXlJRFIjISM9JCIyOWlyc1lNblMjISM9JCIyWSdbNFkiUTRVIyEjPSQiMnk1PVwjPTlOQyEjPSQiMjlOVFBdWCRcQyEjPSQiMnVla0Q9XE5ZIyEjPSQiMjEkeVFoR3Z4QyEjPSQiMXU1QFNsJj5cIyEjPCQiMTxWLj4tOzFEISM8JCIyMWNkeSpRTz9EISM9JCIyVSEzb3d2Y01EISM9JCIydi8vYkRyKFtEISM9JCIyOUhGViRcKEhjIyEjPSQiMmpfXUpoeXJkIyEjPSQiMXJQKD5II1EiZiMhIzwkIjJRLCh6cWZlMEUhIz0kIjFkLWlcJyp5PkUhIzwkIjIuXVYlR0wqUmojISM9JCIyVXVtcysoPltFISM9JCIxKCkqKjMnbytDbSMhIzwkIjFCSyJcTy9tbiMhIzwkIjJtWU9QLzMzcCMhIz0kIjByZkRzNl1xIyEjOyQiMWBIUSxhQD5GISM8JCIxKD4xLTM+TXQjISM8JCIyMVdIIWZGaVpGISM9JCIxJW9feVZFPXcjISM8JCIyJT5mbjssLndGISM9JCIyRjsqXCZ6TC16IyEjPSQiMmpTQVZaUFchRyEjPSQiMi1sWEo6VCc9RyEjPSQiMk0qKW8+JFslRyRHISM9JCIybjgjejUmW3ElRyEjPSQiMjFROicqPV83J0chIz0kIjJiaFElb2VYdkchIz0kIjIlZj1FWiZmJyopRyEjPSQiMS5eM0VLJ1EhSCEjPCQiMmlNM1whcDE9SCEjPSQiMiYqZUpQZXFBJEghIz0kIjJNJFtiaVVaWUghIz0kIjF4IXk4JXpuZ0ghIzwkIjJBSiwtaSIpWyhIISM9JCIyZWJDISpIJjMqKUghIz0kIjEqelp5KCopRy5JISM8JCIyQi9ybWwjXDxJISM9JCIyaUclXE5qcEpJISM9JCIyKUh2SjkrIWYvJCEjPSQiMXQyOSRwLiwxJCEjPCQiMiczUyc+UDJWMiQhIz0kIjFfc3ldNV4pMyQhIzwkIjJlXDUnSFpyLUohIz0kIjIlUlBWMyU9cDYkISM9JCIxIylwRCgzQTY4JCEjPCQiMUUtM21kS1hKISM8JCIwWi5cV0gmZkohIzskIjEwbnNCSnR0SiEjPCQiMVwqXEQhbyR6PSQhIzwkIjEjPnQ4W1NAPyQhIzwkIjJhVic+Z1RNO0shIz0kIjF6Jz4hUnlhSUshIzwkIjJFI0gleV5eWkMkISM9JCIxbWhtJz5iKmVLISM8JCIyOVMqW3YpZUpGJCEjPSQiMVhFSmFETyhHJCEjPCQiMicpKWU4TGljLEwhIz0kIjI6OGY+IipwZEokISM9JCIxd0J5IWZ0KkhMISM8JCIyJz1jZ3BzPFdMISM9JCIxaSlHJVs0UWVMISM8JCIxMUBERlllc0whIzwkIjFUYDIxJCl5J1EkISM8JCIxJmUpKlspPio0UyQhIzwkIjFHPXNqYz46TSEjPCQiMXNdYVUkKlJITSEjPCQiMmFKbzgtLk9XJCEjPSQiMWY6PituIXlYJCEjPCQiMkUhWyx6LixzTSEjPSQiMVEhUXkwOWlbJCEjPCQiMjlHaG10PC9dJCEjPSQiMURYWzo5aTlOISM8JCIxb3hJJTREKUdOISM8JCIxNzU4dChHSWEkISM8JCIxYlUmPlhLc2IkISM8JCIxKVx4MjhPOWQkISM8JCIxTTJnNClSY2UkISM8JCIydShSVSlbVikqZiQhIz0kIjFBc0Nuci85TyEjPCQiMllZcWclM0RHTyEjPSQiMTNQKltfYUNrJCEjPCQiMV5wci4jZW1sJCEjPCQiMSY+U0QpPSczbiQhIzwkIjIxVmo4Y2xdbyQhIz0kIjF1bT1TI3AjKnAkISM8JCIxPCo0IT5IWjhQISM8JCIxaEokeWZ3d3MkISM8JCIyTlNjbUYhKT11JCEjPSQiMVsnemEmUjNjUCEjPCQiMjkqR0lNd0dxUCEjPSQiMnU3RUpKIlwleSQhIz0kIjBQXD4qXHApeiQhIzskIjE4RXhxJykqRyJRISM8JCIxZGVmXEI1RlEhIzwkIi8iPiVHZ0lUUSEjOiQiMVdCQzIoNGImUSEjPCQiMnZlbGdROChwUSEjPSQiMUIpKSlbMTxSKVEhIzwkIjFtP3JWMjcpKlEhIzwkIjBKTkRVQ0IiUiEjOyQiMk5iZTg1R2wjUiEjPSQiMSh6Ij0heUoyJVIhIzwkIjAvMCFmYSRcJlIhIzskIjElR0d5OFIicFIhIzwkIjFGOmw7R00kKVIhIzwkIjFqWlomXFl2KlIhIzwkIjExISlIdSx2NlMhIzwkIjImXDc3YFEmZi0lISM9JCIxJFxXPmBkLC8lISM8JCIxUHh3NTdPYVMhIzwkIjApNGYqKVtjb1MhIzskIjFDVVRvJm9GMyUhIzwkIjFmdUJaQShwNCUhIzwkIjEuMjFFZjw2VCEjPCQiMVlSKVtnemA3JSEjPCQiMD4yUEckZVJUISM7JCIyTVZJRCdweWBUISM9JCIxd09OVDEqejslISM8JCIyMSNwPD9WPiM9JSEjPSQiMWIsKyoqelInPiUhIzwkIjIlKlJCeW4sMUAlISM9JCIxVm1rY2AhW0ElISM8JCIybSkpcGEuNCFSVSEjPSQiMiZISkg5RkBgVSEjPSQiMXRqNiRSO3VFJSEjPCQiMm1oUj4yPztHJSEjPSQiMV9Hd11QI2VIJSEjPCQiMSc0J2VIdS01ViEjPCQiMVIkNCUzNkJDViEjPCQiMSNlS3N5TSVRViEjPCQiMUVlMG0lUUVOJSEjPCQiMDJ6WzlVb08lISM7JCIxN0JxQmUvIlElISM8JCIxW2JfLSZcX1IlISM8JCIyOnpbOD1gJTRXISM9JCIybC5zLCdvbEJXISM9JCIxel8qKlEwJ3lWJSEjPCQiMUEmPXlAaz9YJSEjPCQiMWw8aycqeUVtVyEjPCQiMTRdWXY6WiFbJSEjPCQiMVgjKUdhX24lXCUhIzwkIjJ3WzZKJCp5KTNYISM9JCIxS1okPmgjM0JYISM8JCIyYSh6diFIJ0dQWCEjPSQiMndAImVwKipbXlghIz0kIjFpV1NbT3BsWCEjPCQiMmJxRnNLKCopelghIz0kIjFUNDAxNTUlZiUhIzwkIjElPXVbby8kM1khIzwkIjFHdXBqJDNEaSUhIzwkIjFyMV9VP3JPWSEjPCQiMTpSTUBkIjRsJSEjPCQiMWVyOyslPl5tJSEjPCQiMS0vKip5SUt6WSEjPCQiMnZqOHl2RU5wJSEjPSQiMSIpb2pPL3QyWiEjPCQiMlk3Z2E2TT5zJSEjPSQiMnZPJEclelBodCUhIz0kIjE2bTV0OU1dWiEjPCQiMWIpSD46WFh3JSEjPCQiMSo0YDIkKVsoeVohIzwkIjFVamQ0RCZIeiUhIzwkIjF5JipSKT1jciFbISM8JCIxQEdBbilmOCNbISM8JCIxa2cvWU5jTlshIzwkIjEzJHBbQW4oXFshIzwkIjI5YiNwLjQoUidbISM9JCIxJno6RGV1InlbISM8JCIxUSFSOEV5QipbISM8JCIxdEE7Uz5lMVwhIzwkIjJ1XiYpKj1jeT9cISM9JCIwdzN5SCopXCRcISM7JCIyWStLbShIPlxcISM9JCIxW19YYm1SalwhIzwkIjIvXHlVTCt3KFwhIz0kIjFOPDU4UyE9KlwhIzwkIjIxKFwjPnAyZysmISM9JCIyTkBbMlA2LS0mISM9JCIxZDlkXF1UTV0hIzwkIi9aUkcoPSdbXSEjOiQiMVh6QDJDI0cxJiEjPCQiMSg9VGczRXEyJiEjPCQiMjlWa1t3SDc0JiEjPSQiMW53b1ZNVjBeISM8JCIwIjReQXJqPl4hIzskIjFhVEwsMyVROCYhIzwkIjEoUmQsW1chW14hIzwkIjFVMSkqZSJbQTsmISM8JCIxJSlRIXkkPVh3XiEjPCQiMUZyaTtibCE+JiEjPCQiMWouWCY+Zls/JiEjPCQiMmNndFUoRzE+XyEjPSQiMjEmbzRgbEVMXyEjPSQiMSQ0Pz5CcXVDJiEjPCQiMVBMdTVSbmhfISM8JCIyMWVtJipleGVGJiEjPSQiMk4jKSpRbzczIUgmISM9JCIyJmZJQFpcRy9gISM9JCIxLWouRScpWz1gISM8JCIxWiZmW0kjcEtgISM8JCIyJip5I28kKWYqb00mISM9JCIxTWddaScqNGhgISM8JCIydUZIOE0uYFAmISM9JCIwX18sLTImKlEmISM7JCIxa2QoKilwNVBTJiEjPCQiMiUpKiopenhWInpUJiEjPSQiMVVBaWMhPUBWJiEjPCQiMSdbWGF0QGpXJiEjPCQiMUgob1VURDBZJiEjPCQiMXQ+NCQ0SFpaJiEjPCQiMTxfIj54SyopWyYhIzwkIjBZUTJYT0pdJiEjOyQiMSZwaCZILE08YiEjPCQiMVJcUTNRYUpiISM8JCIxJD0zc1taZGEmISM8JCIxRDkubTYmKmZiISM8JCIyJnBZJlslWzp1YiEjPSQiMTd6bkImZSQpZSYhIzwkIjJtOixEP2lEZyYhIz0kIjEjUkM4KWV3O2MhIzwkIjJialosY3A0aiYhIz0kIjIleTMoKlFLPFhjISM9JCIxQVR6PHBQZmMhIzwkIjJiTzxtZiFldGMhIz0kIjIlMzFXdlV5KG8mISM9JCIyTSZRRWF6KT5xJiEjPSQiMicpMygzTDs+O2QhIz0kIjFKLiI+SiZSSWQhIzwkIjF2TnQhKiopZldkISM8JCIxPm9icEUhKWVkISM8JCIxaStRW2ordGQhIzwkIjEwTD9GK0AoeSYhIzwkIjFcbC0xUFQsZSEjPCQiMmF5XFtRPGMiZSEjPSQiMnctdE8xQClIZSEjPSQiMXJpXFVaLVdlISM8JCIxOSY+OFVHI2VlISM8JCIxZkY5K0BWc2UhIzwkIjEsZycqeWRqJyllISM8JCIyYkMqeWQlUjMhZiEjPSQiMSJbN204Vl0iZiEjPCQiMUNkVjpvQ0hmISM8JCIxbyplVVxdTSVmISM8JCIxNkEzdFRsZGYhIzwkIjFjYSE+JnkmPShmISM8JCIxKXBHMmBoZylmISM8JCIxVT5iNF9FK2chIzwkIjF4XlApKSlvVywnISM8JCIxQCUpPm5EbkdnISM8JCIyWW1AZ0N3Ry8nISM9JCIxMlwlWyMqenEwJyEjPCQiMV4ib09nJEdyZyEjPCQiMSZSIlwjRyhbJjMnISM8JCIxUVlKaDRwKjQnISM8JCIyTih5OFNZKlE2JyEjPSQiMTw2Jyo9JCk0R2ghIzwkIjI5TyV5KCo+SVVoISM9JCIyT2cybW4wbDonISM9JCIxWzNWYiQ0MjwnISM8JCIyOTRhVS44XD0nISM9JCIxTnQyOG42Kj4nISM8JCIxeTAhPlI/TEAnISM8JCIxOVFzcVNfRmkhIzwkIjFkcWFceHNUaSEjPCQiLy5QRzkkZkQnISM6JCIxVk4+Ml44cWkhIzwkIjEoeTtneVFWRychIzwkIjFLKyVbWVUmKUgnISM8JCIxdUttVmh1N2ohIzwkIjE0bFtBKVxwSychIzwkIjFhKDQ4XWA2TSchIzwkIjEpKkg4IT1kYE4nISM8JCIwQ2MqZTNjcGohIzskIjElW3p4YGtQUSchIzwkIjFGRmc7I296UichIzwkIjFyZlUmKj08N2shIzwkIjExI1xVZHZqVSchIzwkIjBYc0lEejBXJyEjOyQiMSRwJio9JEh5YWshIzwkIjFQKj0yaCcpKm9rISM8JCIxekBhKkchPiRbJyEjPCQiMUFhT29SUihcJyEjPCQiMW4nKT1ad2Y2bCEjPCQiMS4+LEU4IWVfJyEjPCQiMVleJFsrMCthJyEjPCQiMFJlT28zVWInISM7JCIxTDtbaUJUb2whIzwkIjF3W0lUZ2gjZSchIzwkIjE+Ikcscz5vZichIzwkIjFqOCYqKVJCNWgnISM8JCIvWXh4cUFEbSEjOiQiMVZ5ZmMyVlJtISM8JCIxJjNAYVZNT2wnISM8JCIxSFZDOSJReW0nISM8JCIxc3YxJHpUP28nISM8JCIxOzMqPVpYaXAnISM8JCIwMTkyOlwvcichIzskIjEmSFAmSEdsQ24hIzwkIjBhZyQzbCYpUW4hIzskIjEjeSQ9KD1nSXYnISM8JCIxRXErbVFFbm4hIzwkIjFwLSRbYW45eSchIzwkIjE2TmxCN24meichIzwkIjFjblotXCgpNG8hIzwkIjEqKioqSCJleVMjbyEjPCQiMVBLN2dBR1FvISM8JCIxemslKlFmW19vISM8JCIxQShweGgqb21vISM8JCIxbUhmJ0gkKjMpbyEjPCQiMEA7YShwNCYqbyEjOyQiMV8lUlVsKyQ0cCEjPCQiMSZwaUlML04jcCEjPCQiMCRmKT0sM3gkcCEjOyQiMXYiNDJwNj4mcCEjPCQiMT1DYHBgNm1wISM8JCIxamNOWyE+LilwISM8JCIxMSp5cnNBWCpwISM8JCIxW0ArMWtzM3EhIzwkIjEjUkRbM0lILSghIzwkIjFGJ1tPd0xyLighIzwkIjFyPVpVdUxecSEjPCQiMTleSEA2YWxxISM8JCIxZSQ9LCFbdXpxISM8JCIxLTslKnklW1I0KCEjPCQiMVhbd2RAOjNyISM8JCIxKDMpZU9lTkFyISM8JCIxQzhUOiZmbDgoISM8JCIxb1hCJT5qMjooISM8JCIxNnkwdG8nXDsoISM8JCIxYjUpPWJxInpyISM8JCIxKUgvMkJ1TD4oISM8JCIxVXZfNHpkMnMhIzwkIjEleV0kKWUieUBzISM8JCIxQFM8bl8pZkIoISM8JCIxanMqZiUqKT1dcyEjPCQiMTIwI1tpI1JrcyEjPCQiMV5Qay5qZnlzISM8JCIxJipwWSMpKip6I0goISM8JCIxUi1IaE8rMnQhIzwkIjEiWzgsTTI3SyghIzwkIjE8biQqPTVUTnQhIzwkIjAnKmZ4cDknXHQhIzskIjEuS2V3JD1RTyghIzwkIjFba1NiPy15dCEjPCQiMHBIVXREQVIoISM7JCIxTkgwOCVIa1MoISM8JCIxeWgoPTRMMVUoISM8JCIxOSUqcHFuJFtWKCEjPCQiMWVFX1wvL1x1ISM8JCIvZk1HVENqdSEjOiQiMVcicHIheVd4dSEjPCQiMShRIypmW147XCghIzwkIjFKYyJbO2JlXSghIzwkIjF1KVFPJSllK18oISM8JCIwNmlDX2lVYCghIzskIjFiYEcsaVlbdiEjPCQiMShmMywpKXBFYyghIzwkIjAlPSQqZU4ob2QoISM7JCIxJTNieEJ4NWYoISM8JCIxRiR5bCI0RzB3ISM8JCIxcjpTJmYlWz53ISM8JCIxOFtBdSMpb0x3ISM8JCIxXiFbSSY+KnlrKCEjPCQiMSRIcj1qJjRpdyEjPCQiMU9YcDUkKkh3dyEjPCQiMXp4XiopSF0hcCghIzwkIjFDNU1vbXEveCEjPCQiMW1VO1ouIio9eCEjPCQiMF4oKWYtOUp0KCEjOyQiMVoyIltxPHR1KCEjPCQiMCpSaiRRQDp3KCEjOyQiMUtzWGldc3Z4ISM8JCIxdy9HVChHKip5KCEjPCQiMUBQNT9DOC95ISM8JCIxanAjKik0TyQ9eSEjPCQiMTItdngoUkQkeSEjPCQiMVVNZGNNdVl5ISM8JCIxKG8nUk5yJTQneSEjPCQiMUEqPlUiMzp2eSEjPDdgamwkIjBoeW4zKkhJISkhIzwkIjF2eldTVDh2IikhIz0kIjBNPFQ+cCo+JCkhIzwkIjEwbnlaVSFbWSkhIz0kIjAqZlgsJFInNCcpISM8JCIxYWA3YlZaYSgpISM9JCIwcyV6MyU0JCoqKSkhIzwkIjEmM2tDWVdULyohIz0kIjBYTGheeiopPSohIzwkIjE6RyEpcFgiUUwqISM9JCIwPXNNaVwneSUqISM8JCIxWTo5eFlbQicqISM9JCIxSjMiM3Q+JG8oKiEjPSQiMSY+IVsleWFKIioqISM9JCIxY1wiUSkqKXowNSEjPCQiMkQqPT0qWyNHPzUhIz0kIjFIKVtYKmZ3TTUhIzwkIjJjdzoqKlxcI1w1ISM9JCIyQHEjRzBJdGo1ISM9JCIyMGpcMV47I3k1ISM9JCIyc2M7ZywrRjQiISM9JCIyTl0kUUBOPTI2ISM9JCIwV11uLW47NyIhIzskIjJtUDxAYF1oOCIhIz0kIjE4VltQU2pdNiEjPCQiMidcNyZHYTxeOyIhIz0kIjF5Ij0jWzVnejYhIzwkIjJYNiZlYFgzJT4iISM9JCIyNzBfKmUhbyYzNyEjPSQiMnYpKj1WY15JQSIhIz0kIjFDZm9wXWBQNyEjPCQiMjEnRzB2Jj0/RCIhIz0kIjJ2ej4vMy1sRSIhIz0kIjJkcyd5JmUmKTRHIiEjPSQiMkFtYDY0cGFIIiEjPSQiMigpZj9sZl8qNDghIz0kIjFOdik9NU9XSyIhIzwkIjI9WmFzZz4qUTghIz0kIjIiMzlpN0pTYDghIz0kIjJbTSkpemgnKXlPIiEjPSQiMktGYkw3cUJRIiEjPSQiMiY0QXNHTyZvUiIhIz0kIjJrOSozTXJMNjkhIz0kIjJGM2MlUjEjZVUiISM9JCIyJT5JI1s5Ly5XIiEjPSQiMmMmKio9XXd5YTkhIz0kIjEjKm9iYjZGcDkhIzwkIjIyI1EjNG1hUFsiISM9JCIyc3YhSG0iUSMpXCIhIz0kIjJQcGQ7bkBGXiIhIz0kIjIuakNxPDBzXyIhIz0kIjJvYyJSI28pb1Q6ISM9JCIyTF1leD1zaGIiISM9JCIwV0RKcGIxZCIhIzskIjIlb0JcKT5SXmUiISM9JCIyWklmUXFBJypmIiEjPSQiMVRpQTRpNTk7ISM8JCIydTwkZjkoKmVHOyEjPSQiMlg2Zyo+SzJWOyEjPSQiMjMwRmBzY3ZsIiEjPSQiMnYpUnBJLS9zOyEjPSQiMTs0MU9QXydvIiEjPCQiMkUmeVVUcyssPCEjPSQiMSp5JXpZMlw6PCEjPCQiMmNzaEBEdSpIPCEjPSQiMWknR3Z2ZFd1IiEjPCQiMiQpZiYqR0VUKmU8ISM9JCIxTkRFb1pVdDwhIzwkIjJNWUhPRjN6eSIhIz0kIi9rKip5PFItPSEjOiQiMmtMalZHdm8iPSEjPSQiMkdGSSgqeWU4JD0hIz0kIjE0czQmSFVlJT0hIzwkIjJpOWsvIWVLZz0hIz0kIjJEM0plSTRbKD0hIz0kIjE2ISk+NkdIKik9ISM8JCIydyVcYztqeC4+ISM9JCIyVik9JD4jKWYjPT4hIz0kIjIxIykpSEZMdUs+ISM9JCIydHZsRSRvQVo+ISM9JCIyUHBLIVEucmg+ISM9JCIwaipSVlE+dz4hIzskIjJrY20oW3RuISo+ISM9JCIxJlxMVCYzOzA/ISM8JCIyOlYrJmZWaz4/ISM9JCIyeU9uWyd5N00/ISM9JCIyWElNLVA2J1s/ISM9JCIxVDdndls0aj8hIzwkIjJzPG80UXl2MiMhIz0kIjJWNk5qKT0xIzQjISM9JCIyRS8tPFJYbDUjISM9JCIxeipvcSopRzU3IyEjPCQiMmAiZlYtQ15OQCEjPSQiMkMmRyF5IWYqKlxAISM9JCIyKCl5cEpUelc7IyEjPSQiMmFzTyY9SCcqeUAhIz0kIjI9bS5SVVlNPiMhIz0kIjIpKmVxI0gqSHo/IyEjPSQiMUV2ak1NVEFBISM8JCIyS1kvKyVwKm9CIyEjPSQiMiYqUnJgVyFRXkEhIz0kIjFPJFEyJlInZUUjISM8JCIyRUYwaFhaLkcjISM9JCIxNEFaaDQkW0gjISM8JCIydzhSb1k5JDRCISM9JCIyVjIxQSh6ekJCISM9JCIyMix0dloiR1FCISM9JCIxWipSSClcd19CISM8JCIyTSlvSSlbW3NPIyEjPSQiMi8jUW4kKj50IlEjISM9JCIyb3ZTISpcOmlSIyEjPSQiMSZvMlcrKnA1QyEjPCQiMjppdSg0RD1EQyEjPSQiMWU6OTpnbVJDISM8JCIxJlwzMF9cVFgjISM8JCIyN1Z2ZS1MJ29DISM9JCIyd09VN2A7SlsjISM9JCIxLyQ0bS4rd1wjISM8JCIyRkJ3PmEkMzdEISM9JCIyJXBKTVpxY0VEISM9JCIyZDU1RmJdNWEjISM9JCIyPC94IWVTYGJEISM9JCIyKXlSV2p2LHFEISM9JCIyYiI0IilvNV0lZSMhIz0kIjI6Jnk8dVgpKilmIyEjPSQiMiYpeVcmeiFvTWgjISM9JCIyaXI2XGVeemkjISM9JCIyS2x5LTROQ2sjISM9JCIyJyplWGNmPXBsIyEjPSQiMm1fNzU1LTluIyEjPSQiMkJZempnJillbyMhIz0kIjIkKlJZPDZwLnEjISM9JCIyZEw4cmhfW3IjISM9JCIyV0UhW0FoTEhGISM9JCIyMj9aeWk+UXUjISM9JCIydTg5SzguJGVGISM9JCIyTTIiZVFteXNGISM9JCIyMCxbUjlxc3kjISM9JCIycyVcSlxPdixHISM9JCIySyk9b2FyQjtHISM9JCIyOyIpWyttPzIkRyEjPSQiMVtkVGxUP1hHISM8JCIyVm8jeXF3b2ZHISM9JCIyOGlcaDxyVChHISM9JCIyJGVsXiJvYScpKUchIz0kIjElXCQpbz1RSiFIISM8JCIxSi9EI3BAdyJIISM8JCIyJWZ0aCg+MEAkSCEjPSQiMmVIJSlIcSllWUghIz0kIjJEQl4kM0EyaEghIz0kIjIpbyI9UHJiYihIISM9JCIxMF4zPiNSKypIISM8JCIxVT9YQ0ZfL0khIzwkIjF6Kj0pSGkrPkkhIzwkIjEyZj1OKCpbTEkhIzwkIjJMJUdiU0soei8kISM9JCIyJ3ooPmZ1Y0MxJCEjPSQiMTtuR14tJXAyJCEjPCQiMWBPbGNQVSI0JCEjPCQiMiUqZT8/RTJmNSQhIz0kIjJkXyhRbjJSP0ohIz0kIjJXWGFGRnVbOCQhIz0kIjI6UkAieXhOXEohIz0kIjFHJClbJEdUUTskISM8JCIxa18mKSl5QyR5SiEjPCQiMjA/QVVIM0c+JCEjPSQiMVAiKmUqeiJIMkshIzwkIjF1ZyZcSXY8QSQhIzwkIjEtSUs1KWVpQiQhIzwkIjFSKipvOkJ1XUshIzwkIjJZKG8wQGVBbEshIz0kIjE3UVVFJDQoekshIzwkIjFbMnpKRz4lSCQhIzwkIjJXb2RyTHcnM0whIz0kIjFAWV9VKWZKSyQhIzwkIjImXDoqeU1Wd0wkISM9JCIxJ1tlSyZvN19MISM8JCIxQmFpZS5obUwhIzwkIjImZUIqUidRNCJRJCEjPSQiMmJIZiRwdGQmUiQhIz0kIjFLaXN1MzE1TSEjPCQiMW9KNCFRV1hVJCEjPCQiMlk1Z2EpeS1STSEjPSQiMU1xIzNSNk5YJCEjPCQiMi8oUj4nKlsqelkkISM9JCIxMjRjLCV5Q1skISM8JCIxV3kjcCE+J3BcJCEjPCQiMiV6Wkg3YVc2TiEjPSQiMTs8bTwqR2ZfJCEjPCQiMWAnR0lVNy9hJCEjPCQiMjplJlJHZipbYiQhIz0kIjE9RHdMJXokcE4hIzwkIjFiJUgiUkgnUWUkISM8JCIyMVInXFdrTSlmJCEjPSQiMndLailcKkhHaCQhIz0kIjFrLUJiTUpGTyEjPCQiL3NmZ3B6VE8hIzokIjFHVCdmWSFHY08hIzwkIjJhMUo4KFJ3cU8hIz0kIjEtISlwd3VDJm8kISM8JCIxUVwxIyk0dCpwJCEjPCQiMXY9VihbOVVyJCEjPCQiMjoiKSl6Iyp6cEdQISM9JCIxW2Q7KVwiPVZQISM8JCIxd0VgLl1tZFAhIzwkIjE4JyoqKTMmW0B4JCEjPCQiMVxsRTk/aid5JCEjPCQiMmNbTCc+YjYsUSEjPSQiMUEvK0QhKmY6USEjPCQiMWV0T0lEM0lRISM8JCIxJkhNZC5tWCVRISM8JCIyTUEsNmFcIWZRISM9JCIyLztvay9MTihRISM9JCIydjROPWI7ISkpUSEjPSQiMUw/P2QrXS1SISM8JCIwKCpvRGMkKXAiUiEjOyQiMTJmJHoxbjkkUiEjPCQiMVZHSXQwJmYlUiEjPCQiMXIocCd5U1ZnUiEjPCQiMTNuLiVlPFwoUiEjPCQiMVhPUyozLCUqKVIhIzwkIjIxZXFaZiUpUSslISM9JCIxPXY4KyJvJD1TISM8JCIxYFddMDsmRy4lISM8JCIyL1JyMzZOdC8lISM9JCIydUtRaWg9PTElISM9JCIyYUQwOzctajIlISM9JCIxIz5zcGkmeSE0JSEjPCQiMUgiUkI4cF81JSEjPCQiMlgxMXhqXyg+VCEjPSQiMjordEk5T1U4JSEjPSQiMidRKlIlWyc+KFtUISM9JCIxdW8hUTouSzslISM8JCIxLVE8Zm1veFQhIzwkIjFSMmFrLDwjPiUhIzwkIjF3dyEqcE9sMVUhIzwkIjE3WUZ2cjhAVSEjPCQiMVw6ayFvP2NCJSEjPCQiMSZbM2c9LyxEJSEjPCQiMUFhUCJwKGVrVSEjPCQiMjBOVW4+ciF6VSEjPSQiMShHNEBxYU5IJSEjPCQiMUNpWjIjUSEzViEjPCQiMiZmSiVHckBESyUhIz0kIjJsNDUjPV8rUFYhIz0kIjJPLnhOcylbXlYhIz0kIjIxKFIlKkdBKGZPJSEjPSQiMSoqM0pNZFghUSUhIzwkIjFNeW5SI1JcUiUhIzwkIjI5eFdddUElNFchIz0kIjEyPFRdaSFSVSUhIzwkIjFXJ3lkdipRUVchIzwkIjEiZVg2RXRHWCUhIzwkIjE8RF5tbk5uVyEjPCQiMmJXej1GUz1bJSEjPSQiMSNRWXN4QmpcJSEjPCQiMT1MaCNHMjNeJSEjPCQiMlhEISl6eSFIRFghIz0kIjI7PlpMSHUoUlghIz0kIjFHVHIpemRVYiUhIzwkIjFsNTMvOHVvWCEjPCQiMSQqelc0W0EkZSUhIzwkIjAkXCJbSjN4ZiUhIzskIjFtPT0/PT43WSEjPCQiMS4pW2JLdm1pJSEjPCQiMiVRZCI0JCllNmslISM9JCIyYW4jR09Ca2JZISM9JCIyRGhcOyVlN3FZISM9JCIxVGwsWiQ0WW8lISM8JCIxeE1RX0c0KnAlISM8JCIxOS92ZGpkOFohIzwkIjImXHQ2ailmIUdaISM9JCIybUclW29MYVVaISM9JCIxQjcmUShvLWRaISM8JCIwOz0jei5eclohIzskIjEqMyZlJSlRKmZ5JSEjPCQiMUQ/JioqUXgvIVshIzwkIjI5Jyo9YCozJ1wiWyEjPSQiMSkqZW8rV1dIWyEjPCQiMU5HMDF6I1IlWyEjPCQiMjB4PjlUNiVlWyEjPSQiMnZxJ3k7XCpHKFshIz0kIjJYa2BAVXl0KVshIz0kIjJFZD92Iz4nPSFcISM9JCIxM3YpR1ZYaiJcISM8JCIxWFdEUSpHMyRcISM8JCIyO1FAT1c3YCVcISM9JCIxPSQpKSpbZnpmXCEjPCQiMWFfTmElelUoXCEjPCQiMjk+QShmSHcpKVwhIz0kIjA3KjNsa0MuXSEjOyQiMmswYy8oKkh4LCYhIz0kIjEkKkgjZVo4QS4mISM8JCIxSCoqPSIpcHBZXSEjPCQiMW5vYidbIT1oXSEjPCQiMkQhUSM+KlJtdl0hIz0kIjFRMkgoXFosNCYhIzwkIjFvd2wtNWovXiEjPCQiMllnQyEzWDY+XiEjPSQiMGEiUjghKWZMXiEjOyQiMXclZSg9OjNbXiEjPCQiMldURFQtbEQ7JiEjPSQiME4jXEgmW3E8JiEjOyQiMSdHZlsuSzo+JiEjPCQiMTppQVNiLDFfISM8JCIyOTokZlghKlw/XyEjPSQiMSkzZzRiIylcQiYhIzwkIjFEcUtjZ1lcXyEjPCQiMWhScGgmXFJFJiEjPCQiMSkqMzFuSVZ5XyEjPCQiMlkkeVVzbCJISCYhIz0kIjFpWnp4K1MyYCEjPCQiMSlwaEplJCk9SyYhIzwkIjFPJ0cmKTNuakwmISM8JCIxc2IqUWZdM04mISM8JCIxM0RFKjRNYE8mISM8JCIxWSVIWWc8KXpgISM8JCIyOVEnKio0NkklUiYhIz0kIjIlNExPOll5M2EhIz0kIjFYLXQ/Im9LVSYhIzwkIjJOPSg0RTt2UGEhIz0kIjE+VFlKXkJfYSEjPCQiMWM1JG9qPW5ZJiEjPCQiMSQqej5VQD8iWyYhIzwkIjFIXGNaY28mXCYhIzwkIjFtPSRIOnAsXiYhIzwkIjEleilIZUVsQ2IhIzwkIjInSGRtamg4UmIhIz0kIjFvRS5wJz5PYiYhIzwkIjEvJypSdUo1b2IhIzwkIjIlUmx3em1lI2UmISM9JCIxeU04Jj1xcWYmISM8JCIyTlQrMHBgOmgmISM9JCIyOk1uZT5QZ2kmISM9JCIxeFVCLDJfU2MhIzwkIjE6N2cxVStiYyEjPCQiMV4ibz5yKFtwYyEjPCQiMnczTnRAclJvJiEjPSQiMUM/cUFaWClwJiEjPCQiMWgqbyFHI1FIciYhIzwkIjEpKWVWTDxVRmQhIzwkIjJhI0chKVFfIT51JiEjPSQiMWkocFR1KVFjZCEjPCQiMiUqcE8mXEEoM3gmISM9JCIxTk8hXHZiYHkmISM8JCIyOmRxLUVSKSp6JiEjPSQiMTR2amxGSzllISM8JCIxUFcrcmkhKUdlISM8JCIxdDhQdygqR1ZlISM8JCIyJjMkUTxHdHgmZSEjPSQiMVpfNSh5Y0EoZSEjPCQiMkU9c0NIU24pZSEjPSQiMT0iUnl6QjchZiEjPCQiMWJnPy50cTpmISM8JCIxJilIZDMzPklmISM8JCIyLyMqUlJKdVklZiEjPSQiMnUmb0k+eTpmZiEjPSQiMSR6dFlLVE8oZiEjPCQiMjp0UyskWzcpKWYhIz0kIjFud1NOJDNFKychIzwkIjEuWXhTPTQ8ZyEjPCQiMUo6OVlgZEpnISM8JCIyJ28lMzomKWVnLychIz0kIjEwYShvTlUwMSchIzwkIjIxTVVBJ2UtdmchIz0kIjF5IzR3TzQmKjMnISM8JCIxOmkoSChHKlI1JyEjPCQiMDpWJHlqWj1oISM7JCIyJXkrciQpKWZIOCchIz0kIjE7cTIqUVZ1OSchIzwkIjFfUlclKm8jPjsnISM8JCIxKikzIikqUjVrPCchIzwkIjJYI3k8MFIqMz4nISM9JCIyOndXMFR4YD8nISM9JCIyJilwNmYiNCcpPmkhIz0kIjJtaXk3VVdWQichIz0kIjFpYmtFeiMpW2khIzwkIi9ELEs5SmppISM6JCIxUCV6dCRcenhpISM8JCIxdGp1VSV5QUgnISM8JCIwSjgiWz53MWohIzskIjFaLVtgYUNAaiEjPCQiMSM9WillKkdkTCchIzwkIjA2OVVZNy1OJyEjOyQiMVo1ZXBmcGtqISM8JCIxJSl6JVxaeiJ6aiEjPCQiMCNcSiEpSG0kUichIzskIjFkPW8mW1kiM2shIzwkIjElels1KipIRVUnISM8JCIwdDprXDhyVichIzskIjFlRXkscWZeayEjPCQiMSVmXHJdITNtayEjPCQiMUtsXjdTYyFbJyEjPCQiMW9NKXleWl1cJyEjPCQiMS4vREI1YDRsISM8JCIxUnRoR1gsQ2whIzwkIjF4VSlSLilcUWwhIzwkIjExN05SOilIYichIzwkIjFVIj1aL2x1YychIzwkIjF6XTNdJls+ZSchIzwkIjE7P1hiP1YnZichIzwkIjFfKj0zYzo0aCchIzwkIjEqKWU9bSEqUkRtISM8JCIxRUdickQpKVJtISM8JCIxYCg+cDJtVmwnISM8JCIwcCdHI2VcKW9tISM7JCIxRU9sKDNMTG8nISM8JCIxajAtJGY7eXAnISM8JCIvdlEpNCtCcichIzokIjFOV3YuT3lFbiEjPCQiMXI4NzRyRVRuISM8JCIxLCQpWzkxdmJuISM8JCIxUF8mKT5UQnFuISM8JCIxdUBBRHdyJXknISM8JCIwNiplSTY/KnonISM7JCIxWmcmZmolbzhvISM8JCIxJSlIS1QibyJHbyEjPCQiMT4qKm9ZO2xVbyEjPCQiMCZvMF9eOGRvISM7JCIxJnlCdWw9OyhvISM8JCIxQTJ6aUA1JylvISM8JCIxZXc6b2NlK3AhIzwkIjEmZkNOPHBdInAhIzwkIjFLOiopeUViSHAhIzwkIjFuJWVVPU9TJXAhIzwkIjEuYWkqbz4mZXAhIzwkIjFMQipcPi5JKHAhIzwkIjFwI2YucSdbKClwISM8JCIxMGlzMC0oPisoISM8JCIxVUo0NlBYO3EhIzwkIjF6K1k7cyQ0LighIzwkIjE5cSM9cz9hLyghIzwkIjFeUj5GVSEqZnEhIzwkIjApM2NLeFF1cSEjOyQiMTx5I3pCcikpMyghIzwkIjFgWkhWWk4uciEjPCQiMHBoJ1sjUXk2KCEjOyQiMUYnR1N2QEI4KCEjPCQiMWliUmZfIW85KCEjPCQiL0R3aygpR2hyISM6JCIxRyVILEZzZDwoISM8JCIxa2pcdmREIT4oISM8JCIxLEwnM0dSWj8oISM8JCIxUC1CJ3lBIz5zISM8JCIxdXJmIkgxUEIoISM8JCIxNlQncHoqPVtzISM8JCIxWTVMLUxuaXMhIzwkIjF2enAybzp4cyEjPCQiMTdcMTguayJIKCEjPCQiMVs9Vj1RNzF0ISM8JCIxJnkpekJ0Zz90ISM8JCIwc2wiSDM0TnQhIzskIjFlRWBNVmRcdCEjPCQiMSRmKiopUnkwa3QhIzwkIjFCbEVYOGF5dCEjPCQiMFlMMSZbLSRSKCEjOyQiMSdSK2dOM3ZTKCEjPCQiMUx0T2g9Kj5VKCEjPCQiMXBVdG1gWk91ISM8JCIxMTc1cyllNFgoISM8JCIxViJvdVBVYVkoISM8JCIxcl0kRyllIyp6dSEjPCQiMTI/PylRNFdcKCEjPCQiMVYqb04qRyopM3YhIzwkIjApZSQqKVJ3TF8oISM7JCIxPEdJLypmeWAoISM8JCIxYChwJzRNTV92ISM8JCIwcE9dInAjb2MoISM7JCIxPU9TPy9KImUoISM8JCIxYTB4RFJ6JmYoISM8JCIxIlxQNlZ4LWgoISM8JCIxRlddTzR3Q3chIzwkIjFrOCg9V1cjUnchIzwkIi8kUXMlenNgdyEjOiQiMU9fZ185QG93ISM8JCIxbkAoeiZccCNvKCEjPCQiMS8iUkxZeXJwKCEjPCQiMVJncW8+bTZ4ISM8JCIxdkgydWE5RXghIzwkIjE3KlIleipHMXUoISM8JCIxXG8hW1s3XnYoISM8JCIxJnl0LCpmZnB4ISM8JCIwc1NiXHpTeSghIzskIjBsMjQraiYpeighIzskIjEoZXVpXVlJInkhIzwkIjFBOms2K2BGeSEjPCQiMWYlM3FeOD8leSEjPCQiMSdSdkItKFxjeSEjPCQiMUxCdUYwKTQoeSEjPCQiMW8jNEoua2EpeSEjPCQiMSg+dyVRdiUqKip5ISM8JCIxTUolUS9KVyJ6ISM8JCIwMjUjXFgiKkd6ISM7JCIxMnFkYSEpUlZ6ISM8JCIxVlIlKmY6KXkmeiEjPCQiMCkzSmxdT3N6ISM7JCIxPHlucSZbbyl6ISM8JCIxWFovdz9MLCEpISM8JCIxI282OWU6ZSwpISM8JCIwaHluMypISSEpISM7N2BqbCQiMTkhPnZeNUg7KSEjPSQiMXIuX2d0ODUkKSEjPSQiMUY8Xy5VT2QlKSEjPSQiMSUzQmwvImYvJykhIz0kIjFmVl8qKXkiPXYpISM9JCIxOmRfS1ovKiopKSEjPSQiMDJGYmRyaS8qISM8JCIxSCVHJj0lKVwkPiohIz0kIjEmeUg6RUQyTSohIz0kIjFVNmAvQCZ6WyohIz0kIjEpXEt2JSp5XmoqISM9JCIxYFFgIXowQ3kqISM9JCIwOE5OaksnSCoqISM8JCIyJ1tPbFpmbzI1ISM9JCIyVHlgPmozQy0iISM9JCIwI1JEOzg4UDUhIzskIjJkMGEwK2E9MCIhIz0kIjI3PmFbb3dsMSIhIz0kIjJwS2EicCQqSCIzIiEjPSQiMldYYU0wQWc0IiEjPSQiMGZheHRXMjYiISM7JCIyZHNhP1VuYTciISM9JCIyNydbTjEsPlM2ISM9JCIxKCpcbCF6N1w6IiEjPCQiMkc4YlxaTidwNiEjPSQiMiRvX0RmImVWPSIhIz0kIjJlUmJOJTMzKj4iISM9JCIyOWBieV8uUUAiISM9JCIycm1iQEBFJkc3ISM9JCIyRiFlWCcqKVtLQyIhIz0kIjIlUWZ2IWVyekQiISM9JCIxdWcwbFVwczchIzwkIjIqNGlOXHBUKEciISM9JCIydUxjT2pSQEkiISM9JCIyR1pjekppb0oiISM9JCIyJjNtRC1dZUo4ISM9JCIyVXVjbG8yak0iISM9JCIyLSlvJjNQSTVPIiEjPSQiMmUsZF4wYGRQIiEjPSQiMjg6ZCVSZFohUiIhIz0kIjIpeXN2QiUpPjA5ISM9JCIyVFRkITM2Iyo+OSEjPSQiMixiZEJ6VllWIiEjPSQiMmRvZG1abSRcOSEjPSQiMjcjeSY0OyozazkhIz0kIjJwJnpEWD0iKXk5ISM9JCIyRDRlJkhYYCRcIiEjPSQiMi1BZVFAZCMzOiEjPSQiMmVOZSIpKil6SF8iISM9JCIyN1xlQ2UteGAiISM9JCIxRidlbkVEQ2IiISM8JCIyRXdlNSZ6OW46ISM9JCIyJCkqKWVganE9ZSIhIz0kIjJWLmYnPkxmJ2YiISM9JCIyOztmUis7OGgiISM9JCIydEhmIylvUWdpIiEjPSQiMUwlZkRQaDJrIiEjPCQiMiNvJmZvMCVbYjshIz0kIjJVcWY2dTEtbiIhIz0kIjAlKWZhVUhcbyIhIzskIjJiKCpmKDRAbCpwIiEjPSQiMS4sMSV6dVZyIiEjPCQiMiZRLU95dTRIPCEjPSQiMXUubWksI1F1IiEjPCQiMF5ncCVHYWU8ISM7JCIyZWtnN2BsS3giISM9JCIyOnlnYkApKXp5IiEjPSQiMTw0JykqKjNyLT0hIzwkIjJXL2hUZUx1Ij0hIz0kIjA9aCVvaTpLPSEjOyQiMmRKaEYmKnlvJT0hIz0kIjFeOTFQO2doPSEjPCQiMm5laDhLQ2ooPSEjPSQiMkZzaGMrWjUqPSEjPSQiMiRlPScqKm9wZCE+ISM9JCIyZCk+RXVCXD8+ISM9JCIyODdpJmVdQE4+ISM9JCIxZEEnR3VQKlw+ISM8JCIxJFJpclVnWSc+ISM8JCIyJ0dEWTZKUXo+ISM9JCIyVm1pZHowVCo+ISM9JCIvRzEhW0cpMz8hIzokIjJfJEhPazZiQj8hIz0kIjFqSW1bUUZRPyEjPCQiMicpPmpIYCcqSDAjISM9JCIyVUxqc0A+eDEjISM9JCIwWmo6IT5XIzMjISM7JCIxME8nZWVrcjQjISM8JCIyM3VqLEYoKT02IyEjPSQiMm8oUVlhKjRtNyMhIz0kIjJYK2soUUVMVEAhIz0kIjIpUlQxQmAwY0AhIz0kIjJiRmt0K3kyPCMhIz0kIjE2V20icCtiPSMhIzwkIjFaWCdmUEItPyMhIzwkIjJHb2stMVlcQCMhIz0kIjE9W2NXKG8nSEEhIzwkIjJkJVwnKUc5UldBISM9JCIyOTNsSjY5ImZBISM9JCIxPF9ZKHpPUUYjISM8JCIyRk5sPFtmJilHIyEjPSQiMiQpW2xnOyNHLkIhIz0kIjFDY09dWys9QiEjPCQiMidmZG1NdnNLQiEjPSQiMnQpZScqPS1YWkIhIz0kIjFCZ0UuSDxpQiEjPCQiMidlaGMoZSYqb1AjISM9JCIyVkhtPUY9O1IjISM9JCIyJ0hrO2M0TTFDISM9JCIyX2NtL2tqNVUjISM9JCIyN3FtWksneU5DISM9JCIxSG8xNCE0MFgjISM8JCIyVSdwTyRwSl9ZIyEjPSQiL3JteFYmKnpDISM6JCIyYkJuPjF4WVwjISM9JCIyOlBuaXUqUjREISM9JCIyb11uMFZBVF8jISM9JCIyRGtuWzZYKVFEISM9JCIweG4iKnpuTmIjISM7JCIyYSF6WSRbIUhvRCEjPSQiMj0vb3g7OEllIyEjPSQiMm88bz8mZXQoZiMhIz0kIjJDSm9qYGVDaCMhIz0kIjFbJW8xQSI9RkUhIzwkIjJQZW9cIVIhPmsjISM9JCIyJT4obyMqZUVtbCMhIz0kIjJ1JSlvTkZcOG4jISM9JCIxJCkqb3kmPjInbyMhIzwkIjE9InBAayV6K0YhIzwkIjJWRHBrSzxiciMhIz0kIjInKlFwMixTLXQjISM9JCIyYF9wXXBpXHUjISM9JCIxaCdwJHpgb2ZGISM8JCIyJyl5cE8xM1d4IyEjPSQiMUMqcHp1SSIqeSMhIzwkIjIuMXFBVmBRIUchIz0kIjJfPnFsNncmPUchIz0kIjI7THEzISkpSExHISM9JCIybFlxXltAIVtHISM9JCIyQWdxJXBUdWlHISM9JCIyLXRxUCZvWXhHISM9JCIxbDMyUSYqPSMqRyEjPCQiMjMrckJBN3AhSCEjPSQiMmw4cm0hXGpASCEjPSQiMkdGcjRmZGokSCEjPSQiMTM5RnYtM15IISM8JCIxVzpkZkghZSdIISM8JCIyOW5yUWtEMClIISM9JCIxMj08RyRbXypIISM8JCIyQyU+Wjc1KCo0SSEjPSQiMih5P3gncCRwQ0khIz0kIjJQQHM1UTslUkkhIz0kIjBOc2AxUlQwJCEjOyQiMmRbcydcPCcpb0khIz0kIjE4RShSViVlJDMkISM8JCIyKFtGRj1ySSk0JCEjPSQiMlYpR2QtKUhJNiQhIz0kIjE+SShvW194NyQhIzwkIjFiSjxyXlpVSiEjPCQiMSJIdGEmeT5kSiEjPCQiMUVNeFIwIz48JCEjPCQiMk9idFNBVm09JCEjPSQiMHB0JDNmTyxLISM7JCIyYyNRbiNmKTM7SyEjPSQiMWhSKHBGNjNCJCEjPCQiMSg0dTcnUmBYSyEjPCQiMUtVZFhtRGdLISM8JCIxb1YoKUgkelxGJCEjPCQiMmJcdVQsLSgqRyQhIz0kIjFKWVopcENXSSQhIzwkIjFuWngjUVoiPkwhIzwkIjJEIVwybisoUUwkISM9JCIxUV1QXkZmW0whIzwkIjJYPHZjVjpMTyQhIz0kIjBKdio+IlEheUwhIzskIjFQYUYvM3cjUiQhIzwkIjJDZHYmKVskWzJNISM9JCIxNGQoRzwxQVUkISM8JCIxV2U8ZClHcFYkISM8JCIwKWZaVDpsXk0hIzskIjE7aHhEVVBtTSEjPCQiMjlEdysicDQiWyQhIz0kIjEoUXdWZj5lXCQhIzwkIjE5bG55QWE1TiEjPCQiMGx3SCdcRUROISM7JCIyY3l3c2soKSpSTiEjPSQiMUBwZEoucmFOISM8JCIxY3EoZSxMJXBOISM8JCIyRT54LHFiVGUkISM9JCIxR3RaJVF5KSlmJCEjPCQiMmNYeChvNWc4TyEjPSQiMSJmeEl2QiRHTyEjPCQiMUZ4UFBrL1ZPISM8JCIxaXluQCJweGwkISM8JCIxKSp6KGYhPVxzTyEjPCQiMlg4eS1cOXNvJCEjPSQiMiZwI3lYPFA+cSQhIz0kIjEoUnkpZSlmbXIkISM8JCIyRGB5SmEjUUpQISM9JCIxcCd5dUEwaHUkISM8JCIxLyl5PCJ6IzN3JCEjPCQiMCUqeWdmXWJ4JCEjOyQiMXYhei5HdC16JCEjPCQiMjlAelknZipcIVEhIz0kIjFSJHoqWyc9KD5RISM8JCIyV1p6S0xUVyRRISM9JCIyJTQnenYsayJcUSEjPSQiMVkoej1xJylRJ1EhIzwkIjI5KSl6aFE0J3lRISM9JCIxOytbcT9MJCpRISM8JCIxYCx5YVowM1IhIzwkIjBHITNSdXhBUiEjOyQiMTovUUIsXVBSISM8JCIxXjBvMkdBX1IhIzwkIjEnbyEpPlxYcCdSISM8JCIyRSMzR3cibzspUiEjPSQiMWU0ZWczUicqUiEjPCQiMSQ0IilbYTg2LCUhIzwkIjFANz1IaSRlLSUhIzwkIjFkOFs4KmUwLyUhIzwkIjEkXCJ5KGYiR2JTISM8JCIxRzszI0cvKzIlISM8JCIyWHciUW1wcyUzJSEjPSQiMiYqKj1vXSdcJSo0JSEjPSQiMU4/KVxMc1Q2JSEjPCQiMDwjRz5dKilHVCEjOyQiMSpII2UueGhWVCEjPCQiMU1DKXlRUyRlVCEjPCQiMGQjPXNJMXRUISM7JCIxMEZbY2R5KD0lISM8JCIyOSVHeVMlM0Q/JSEjPSQiMXhIM0Q2QjxVISM8JCIxN0pRNFEmPkIlISM8JCIyJVJLbyRcd21DJSEjPSQiMXdMKXo8KlJoVSEjPCQiMTZOR2k9N3dVISM8JCIxWk9lWVglM0glISM8JCIxJHkkKTNCbmJJJSEjPCQiMT1SPToqKkc/ViEjPCQiMWFTWypmN11MJSEjPCQiMSI9JXkkR04oXFYhIzwkIjE8VjNvelhrViEjPCQiMkVYJVFfMT16ViEjPSQiMSllJW9PTCFSUiUhIzwkIjFCWik0LUUnM1chIzwkIjImZltHMChbTFUlISM9JCIxJypcZSpRciFRVyEjPCQiMUJeKVEyJXpfVyEjPCQiMWVfPWVuXm5XISM8JCIyWFImW1UlUkFbJSEjPSQiMiZIYnlFQCdwXCUhIz0kIjFsYzM2W282WCEjPCQiMjohZVEmXDJrXyUhIz0kIjJrJGZveiw4VFghIz0kIjFrZylSJ0cmZWIlISM8JCIvaUdbYmRxWCEjOiQiMU9qZUsjKUgmZSUhIzwkIjI5WicpbyI0LStZISM9JCIxMm09LE91OVkhIzwkIjFVblsmR20lSFkhIzwkIjIleW95cCopPVdZISM9JCIxMXEzYTsiKmVZISM8JCIxVXJRUVZqdFkhIzwkIjF4c29BcU4pbyUhIzwkIjJGVCgpcHF6SXElISM9JCIxW3ZHIlIteXIlISM8JCIxJW8oZXZdX0taISM8JCIxPnkpKWZ4Q1paISM8JCIxWno9Vy8oPnclISM8JCIyRTMpW0dKcHdaISM9JCIydkApeTdlVCJ6JSEjPSQiMWEkKTMoXFFoIVshIzwkIjImKlspUSI9aDMjWyEjPSQiMUQnKW9sUWVOWyEjPCQiMWgoKSkqXGxJXVshIzwkIjEpKSkpR00jSF0nWyEjPCQiMUMhKmU9PnZ6WyEjPCQiMDsqKUdndVcqWyEjOyQiMSZIKj0oRyg+NFwhIzwkIjI6Vipbcio+UiNcISM9JCIya2MqeWJFa1FcISM9JCIxLigqM1NgT2BcISM8JCIyJVEpKlFDISkzb1whIz0kIjFtKipvMzIiRylcISM8JCIyOTUhKkhSTHYqXCEjPSQiMVAtSHhnRDddISM8JCIxcy5maCh5cC0mISM8JCIyJTMwKmVXLDwvJiEjPSQiMVcxPklUVWNdISM8JCIweSFcOW85cl0hIzskIjEyNHopXHBlMyYhIzwkIjFWNTQkPSNmK14hIzwkIjF5NlJuW0o6XiEjPCQiMllKInBedi5JXiEjPSQiMidcOSpmQmdaOSYhIz0kIjJZZSJIP0hbZl4hIz0kIjFAPGYvYz91XiEjPCQiMVs9KikpR0cqKT0mISM8JCIxJCk+PnQ0bC5fISM8JCIyJj5AXGRPUD1fISM9JCIyWEQjelRqNExfISM9JCIxIlIjNEUhPnlDJiEjPCQiMmxfI1I1PGFpXyEjPSQiMjptI3AlUmtzRiYhIz0kIjImKnkjKip5cSk+SCYhIz0kIjFFSEhqKDRuSSYhIzwkIjFoSWZaQ1ZAYCEjPCQiMms+JCo9OGJoTCYhIz0kIjJOTCQ+O3koM04mISM9JCIyJW9NXCswZ2xgISM9JCIxL096JT1CLlEmISM8JCIyOXQkNHBlLyZSJiEjPSQiMmsnUVJgJm8oNGEhIz0kIjEuU3BQN1xDYSEjPCQiMVFUKj4jUkBSYSEjPCQiMXVVSDFtJFJYJiEjPCQiMi9UJWYhSGYnb2EhIz0kIjFYWCpbKD5RJFsmISM8JCIyRW4lPmZZNSlcJiEjPSQiMnchW1xWdCNHXiYhIz0kIjJZJVx6RitiRmIhIz0kIjAzJjQ3RkZVYiEjOyQiMTpfUidSJipwYiYhIzwkIjI7TiZwITM9PGQmISM9JCIybVsmKlx3U2tlJiEjPSQiMUJjSFxNOyxjISM8JCIwdiZmTGgpZWgmISM7JCIxJillKnkiKTMxaiYhIzwkIjI6LSc+LTpMWGMhIz0kIjJsOidcJz1hK20mISM9JCIyOkgnenFveHVjISM9JCIxR2s0YiYqXCpvJiEjPCQiMk1jJ1JSQUEvZCEjPSQiMHAncEJcJSo9ZCEjOyQiMmsjbyp6Z25PdCYhIz0kIjFqcEgjSCFSW2QhIzwkIjEpNChmd0g2amQhIzwkIjJNQigqM21OeXgmISM9JCIxb3Q+WCRlRHomISM8JCIyYV0oXEg1RzJlISM9JCIxTHd6OFArQWUhIzwkIjIlb3g0KVJFbiRlISM9JCIxLnpSIzNcOSZlISM8JCIyLy8pcG08PG1lISM9JCIxdiIpKjRYJSozKWUhIzwkIjE2JClITnJoJiplISM8JCIxWiUpZj4pUi4iZiEjPCQiMXUmKSpRXWldI2YhIzwkIjInNCgpPik9JnlSZiEjPSQiMlklKSlcc3ldYWYhIz0kIjI7KSopemMwQnBmISM9JCIxPCIqNFRLJlIpZiEjPCQiMV8jKlJEZm4pKmYhIzwkIjEoUSpwNCcpUjhnISM8JCIxOyYqKlJIQCJHZyEjPCQiMV4nKkh5UiVHLychIzwkIjEoeSpmaW1jZGchIzwkIjFBKioqb00qR3NnISM8JCIyJmUrP0o/LCgzJyEjPSQiMk0+K2JyTTw1JyEjPSQiMEwrKSpSZGs2JyEjOyQiMWQvNSUzIT1KaCEjPCQiMk5mKyVvRiFmOSchIz0kIjIlRzJxX2FpZ2ghIz0kIjJNJzMrUCJbYDwnISM9JCIuLDgjMzIhPichIzkkIjFONmcwTnovaSEjPCQiMEYsKio9OyY+aSEjOyQiMSlSLFUoKVFVQichIzwkIjFOOl1lOicqW2khIzwkIjBuLEdDJW9qaSEjOyQiMTA9NUZwU3lpISM8JCIwJT5TNidISkgnISM7JCIxeT9xJkhfeUknISM8JCIxOEErISlcZEFqISM8JCIwTS1WbShIUGohIzskIjF2Q2dbLi1faiEjPCQiMTZFIUguVm5PJyEjPCQiMVpGPzxkWSJRJyEjPCQiMSMpR10sJSk9J1InISM8JCIxPEkhZTM2NFQnISM8JCIxYUo1cVBqRGshIzwkIjEpRy5XWGMuVychIzwkIjE7TXFRInpdWCchIzwkIjFeTitCPSEpcGshIzwkIjEpby50XUNYWychIzwkIjFDUWciPlojKlwnISM8JCIxZlIhZigpcFJeJyEjPCQiMSY0Ly1jI3BHbCEjPCQiMEIvWEM6TWEnISM7JCIxZVYhKUd6OGVsISM8JCIxJFwvSmhnR2QnISM8JCIwai91SCRlKGUnISM7JCIxbFpxIilmSS1tISM8JCIxLFwrbSdHcWgnISM8JCIxUF1JXTh2Sm0hIzwkIjFzXmdNU1pZbSEjPCQiL2AhKj1uPmhtISM6JCIxTmE/LiU+Zm4nISM8JCIwZDB2M1UxcCchIzskIjEyZCE9eGtgcSchIzwkIjFVZTVjdTM/biEjPCQiMXhmU1MsIlt0JyEjPCQiMTlocUNHYFxuISM8JCIxVWkrNGJEa24hIzwkIjF4akkkPnkqeW4hIzwkIjE3bGd4M3EkeichIzwkIjBsMT5jQiUzbyEjOyQiMSZ5MWlDWUojbyEjPCQiMCNwXUkqb3kkbyEjOyQiMWJxIVtoImZfbyEjPCQiMSQ9MiIqSDl0J28hIzwkIjE9dFMkKXAuIylvISM8JCIxYXVxbidmbipvISM8JCIxKmUyP04jWzZwISM8JCIxQ3hJT10/RXAhIzwkIjAneWc/eCM0JXAhIzskIjEmKnohXFNdYyZwISM8JCIxQiIzIyozdC4ocCEjPCQiMEUzTngmNCYpcCEjOyQiMSZSM3lYPSkqKnAhIzwkIjFKJjNAOVRYLCghIzwkIjFuJzNrI1FFSHEhIzwkIjEtKTMyXicpUi8oISM8JCIxUCozXT40KGVxISM8JCIxcyE0JHo9VnRxISM8JCIxLSM0T2NhIikzKCEjPCQiMVAkNHpDeEc1KCEjPCQiMXQlNEEkKipmPHIhIzwkIjEzJzRsaEFCOCghIzwkIjFXKDQzSVhxOSghIzwkIjApKTReKXp3aHIhIzskIjE7K1RwMVx3ciEjPCQiMVUscmBMQCI+KCEjPCQiMXotLFFnJGY/KCEjPCQiMTkvSkEoZTFBKCEjPCQiMVswaDE5UU5zISM8JCIxJm81NDQvLEQoISM8JCIxQDNAdm4jW0UoISM8JCIxYjReZiVcJnpzISM8JCIxJTM2UTlzVUgoISM8JCIxPTc2R1sqKjN0ISM8JCIxZDhUN3ZyQnQhIzwkIjBcNm4+UyVRdCEjOyQiMUY7LCIpRztgdCEjPCQiMWo8SmxiKXlPKCEjPCQiMSkqPWhcIzNFUSghIzwkIjFEPyJSJDRMKFIoISM8JCIxaEBAPU8wN3UhIzwkIjEnSDdESXduVSghIzwkIjFLQyJvKSopXFR1ISM8JCIxbkQ2cjtBY3UhIzwkIjEwRlRiViU0WighIzwkIjFSR3JScW0mWyghIzwkIjFvSCxDKCpRK3YhIzwkIjEtSkozQzY6diEjPCQiMVFLaCM0TilIdiEjPCQiMXVMInB4ZFhhKCEjPCQiMF44N1khR2Z2ISM7JCIxV09eWEordXYhIzwkIjB5OClIZXMpZSghIzskIjE0UjY5JltNZyghIzwkIjFWU1QpPnIiPXchIzwkIjA9OUYpUSpHaighIzskIjE6VixubGhadyEjPCQiMV5XSl4jUkJtKCEjPCQiMSdlOWMkPjF4dyEjPCQiMUFaIio+WXkicCghIzwkIjFcW0AvdF0xeCEjPCQiMSYpXF4pKSpIN3MoISM8JCIwNzpHbl9mdCghIzskIjFiXzZkYG5deCEjPCQiMSNSOjkvKVJseCEjPCQiMUdickQyNyF5KCEjPCQiMWljLDVNJVt6KCEjPCQiMSJ6OlY0bSY0eSEjPCQiMUZmaHkoKUdDeSEjPCQiMWtnIkhZNiFSeSEjPCQiMSg+O3M5TVAmeSEjPCQiMU5qXkpvWG95ISM8JCIwWjtlXnpKKXkhIzskIjEwbTYrQSF6KnkhIzwkIjB1O1cpW2k3eiEjOyQiMXBvcm92TUZ6ISM8JCIxLnEsYC0yVXohIzwkIjFSckpQSHpjeiEjPCQiMXVzaEBjXnJ6ISM8JCIwVDxmSVFpKXohIzskIjFYdkAhKjQnNCspISM8JCIxI288WG4kbzohKSEjPCQiMTN5IillalNJISkhIzwkIjFYejZWIUheLykhIzwkIjEiMz11c14pZiEpISM8JCIxPCM9PFR1WDIpISM8JCIxXyQ9ZzQoSCozKSEjPCQiMShbPS55PlM1KSEjPCQiMUMnPVlZVSg9IikhIzwkIjB2PSpbXllMIikhIzskIjEoKSk9SyR5PVsiKSEjPCQiMTohPnZeNUg7KSEjPDdgamwkIjFFMkJTIjN2RikhIz0kIjF3R0F1PSFvVSkhIz0kIjFHXUAzYzR3JikhIz0kIjF1cj9VJCpRRCgpISM9JCIxViMqPndJb3UpKSEjPSQiMSJSIj41byhSLSohIz0kIjBhJD1XMEZ0IiohIzwkIjBwdiJ5VWNBJCohIzwkIjAleTs3IWU9WiohIzwkIjEnKSpmaHVeNmkqISM9JCIxUUA6IVtYL3gqISM9JCIxJ0dXVEBSKD4qKiEjPSQiMmBqOFtILnArIiEjPSQiMiwmR0BvRSQ9LSIhIz0kIjFsP2hUP3dPNSEjPCQiMEc2XVQicF41ISM7JCIyW1w1JSl5P20xIiEjPSQiMik0KDQ9O106MyIhIz0kIjJZIyozX2B6azQiISM9JCIyODgzJzMqMzk2IiEjPSQiMmhNMj9HUWo3IiEjPSQiMjZjMWFsbjc5IiEjPSQiMXdkISlHcT5jNiEjPCQiMSIqXD8tazdyNiEjPCQiMmU/L2N4Ymc9IiEjPSQiMjFVLiFcXik0PyIhIz0kIjJ2aS1DXzlmQCIhIz0kIjJCJT0hZSpRJTNCIiEjPSQiMnYwLCNwS3hYNyEjPSQiMkBGK0VrLTJFIiEjPSQiMShbKipmLEtjRiIhIzwkIjEtKClSKlFoMEgiISM8JCIxPHp6aTJcMDghIzwkIjJPNyg+TyxVPzghIz0kIjInUWpmNCZcYEwiISM9JCIySmImKkgpKXktTiIhIz0kIjIib1pSYyMzX08iISM9JCIyTClSekh3OCFRIiEjPSQiMiQpPiQ+LnExJlIiISM9JCIxOENmd2oqKjQ5ISM8JCIyKD47KipcZCNcVSIhIz0kIjJYJDNSQl4mKVI5ISM9JCIyKVwreidcJXlhOSEjPSQiMlhFKj1xUXJwOSEjPSQiMiR6JSllVktrJVsiISM9JCIyVnAoKXBocyYqXCIhIz0kIjIjNHBRISo+XTk6ISM9JCIxO2h5ajhWSDohIzwkIjIyTCY9UDJPVzohIz0kIjJiYSVlNSxIZjohIz0kIjIydyQpUls+VWQiISM9JCIyYChIUWQpWyIqZSIhIz0kIjIuPiN5SSN5U2ciISM9JCIyYFMiPS93Kz47ISM9JCIxNzFleHAkUmoiISM8JCIybiMpejRObSlbOyEjPSQiMjwvelZzJnpqOyEjPSQiMm5EeXg0RCh5OyEjPSQiMXN1PHJXbCRwIiEjPCQiMm5vd1glUWUzPCEjPSQiMjghZih6QDhOcyIhIz0kIjEzXlAiZlUlUTwhIzwkIjFCVnhrPlBgPCEjPCQiMVFOPFE4SW88ISM8JCIxYEZkNjJCJHkiISM8JCIyeCc+KFwzZyIpeiIhIz0kIjJGPXIkZSUqMzg9ISM9JCIydVJxPCQpPSFHPSEjPSQiMldncF4/W0glPSEjPSQiMT4pbyZ5dih5Jj0hIzwkIjFNIW8+JnAhRyg9ISM8JCIyKFtzT0RqdCgpPSEjPSQiMlBZbSgpcGxFIT4hIz0kIjIoeWM7c11mPD4hIz0kIjJQKltjWFdfSz4hIz0kIi9UJyo9UVhaPiEjOiQiMTpMTyM+JFFpPiEjPCQiMGBpZGM3dCg+ISM7JCIyYXVoIlI+QyMqPiEjPSQiMi8nNGM3ODwyPyEjPSQiMlo8Z2ZvK0AtIyEjPSQiMigqUWYkZisuUD8hIz0kIjJaZ2VGVmY+MCMhIz0kIjI5Ink6MSkpKW8xIyEjPSQiMmstZCZ6Ij09MyMhIz0kIjI5Q2NIYlpuNCMhIz0kIjFjYU5FcG42QCEjPCQiMXJZdipIMW03IyEjPCQiMScpUTp0Y2BUQCEjPCQiMSxKYlldWWNAISM8JCIydUlfKj5XUnJAISM9JCIyQ19eTHpCaj0jISM9JCIxUDJ2bUpELEEhIzwkIjFfKlwsYSM9O0EhIzwkIjFuIlxOIj42SkEhIzwkIjEjUVtwR1RnQyMhIzwkIjEoZloubXE0RSMhIzwkIjJRIW91TCshZkYjISM9JCIyJT1nOTIlSDNIIyEjPSQiMk1CWDB5ZWRJIyEjPSQiMVtXJVI6KW8/QiEjPCQiMWpPTUZ2aE5CISM8JCIxeUd1K3BhXUIhIzwkIjEkNFVURndhTyMhIzwkIjIpKkhUdmswL1EjISM9JCIyW15TNC1OYFIjISM9JCIyKUgoUlZSay1UIyEjPSQiMlclKlF4dyQ+REMhIz0kIjIlZiJRNjlCLFcjISM9JCIyV1BQWF5fXVgjISM9JCIyJSplT3opPSkqcEMhIz0kIjJlek44RTZcWyMhIz0kIjIzLE5aalMpKlwjISM9JCIyYUFNIjMreDlEISM9JCIyM1dMOlEqcEhEISM9JCIyYWxLXHZHWWEjISM9JCIyLyg9TEciZSZmRCEjPSQiMmUzSjxdKFt1RCEjPSQiMkRISV4ob1QqZSMhIz0kIjJvXUgmW2lNL0UhIz0kIjI5c0c+aXYjPkUhIz0kIjJrJHpLJipcP01FISM9JCIyPTpGKG9WOFxFISM9JCIyb09FQHVqU20jISM9JCIxImVEYjYkKip5RSEjPCQiMmx6QyopW0FScCMhIz0kIjJOK0NCJz0mKTNGISM9JCIxPUtzTjd5QkYhIzwkIjJHVkEiNDFyUUYhIz0kIjJ5a0BEKSpST3YjISM9JCIyRCczI2ZOcCZvRiEjPSQiMnkyPyRIKClcJHkjISM9JCIxI0g+RjVHJSl6IyEjPCQiMiYqXD1oWmRMIkchIz0kIjE5eF5cb0dHRyEjPCQiMilHcCJIQTtLJUchIz0kIjJROTtqZlgiZUchIz0kIjFmYHJwXDJ0RyEjPCQiMlFkOUpNLyEpKUchIz0kIjImKXk4bHJMSCFIISM9JCIyYipIIioqM2p5IkghIz0kIjBAN0xZI3pLSCEjOyQiMlhVNm4kPXNaSCEjPSQiMilSMTY1N2xpSCEjPSQiMl8mKTROZSFleEghIz0kIjAyNHAmKjREKkghIzskIjJfRzMuTFJ1KyQhIz0kIjI6XDJQcW9CLSQhIz0kIjExbjV4ISlIUEkhIzwkIjI6I2ZdXXVBX0khIz0kIjJsODBSI286bkkhIz0kIjIwTi90PiczIzMkISM9JCIxbU5xcWIsKDQkISM8JCIyN3ktVCVcJT42JCEjPSQiMnYpPl08VihvNyQhIz0kIjEtNyE0cC49OSQhIzwkIjJ2VCtWMUxuOiQhIz0kIjFLJypwUENtckohIzwkIjFaKSk0Nj1mJz0kISM8JCIxaSEpXCU9QDo/JCEjPCQiMXhzKnliXWtAJCEjPCQiMSRbJ0hKKno4QiQhIzwkIjImKXAmcC8kNGpDJCEjPSQiMTlcNHknUTdFJCEjPCQiMiZHVFxeIW9oRiQhIz0kIjFXTCpbVSg0IkgkISM8JCIxZURIKXpFZ0kkISM8JCIxdDxwcmgmNEskISM8JCIyJno0NFhiKWVMJCEjPSQiMSY+IVw9XCIzTiQhIzwkIjE0JSopPUhXZE8kISM8JCIxQycpR2xPbiFRJCEjPCQiMidSeW9RSWcmUiQhIz0kIjFicTM3Q2A1TSEjPCQiMEYnWyZ5aGFVJCEjOyQiMm1aJikpZTZSU00hIz0kIjIwcCVHSzBLYk0hIz0kIjExUm8wKlwtWiQhIzwkIjIxNyQzeiN6XlskISM9JCIxT0JbXyczLF0kISM8JCIxXjopZS1RXV4kISM8JCIxbDJHKlJuKkhOISM8JCIwKSp6RXgnKlthJCEjOyQiMnc9emc5RSlmTiEjPSQiMjtTeSU+YnZ1TiEjPSQiMTx3KEcqW28qZSQhIzwkIjI7JG9GbVVoL08hIz0kIjFZZ25ST2E+TyEjPCQiMjtFdkksdFdqJCEjPSQiMXhXWidRLSVcTyEjPCQiMSRvdClmPExrTyEjPCQiMSkqR0ZMNkV6TyEjPCQiMThAbjEwPiVwJCEjPCQiMUY4MiEpKT4iNFAhIzwkIjJFYXFNRFxTcyQhIz0kIjFlKHBvaXkqUVAhIzwkIjJFKCpvLSszUnYkISM9JCIxeiJvT1BQKW9QISM8JCIxJVJucXVtUHkkISM8JCIyJzRtWT9ocCl6JCEjPSQiMUNlJ1FcRE8iUSEjPCQiMVJdRW5bYkdRISM8JCIyT0RrMUMlW1ZRISM9JCIxb00xOU9UZVEhIzwkIjF2RVkoKUhNdFEhIzwkIjIxKj0nM09zIykpUSEjPSQiMlk1aFV0LEshUiEjPSQiMEtndzVKIj1SISM7JCIyWWBmNVtnSSRSISM9JCIwdmVXJikqKXolUiEjOyQiMWx6JnlBPkgnUiEjPCQiMjs8ZDdnW3koUiEjPSQiMSdRY1koengjKlIhIzwkIjI7Z2IhW3RxMlMhIz0kIjE7W1hAbmpBUyEjPCQiMjsuYVs0bXYuJSEjPSQiMVpLRG9hXF9TISM8JCIxaENsVFtVblMhIzwkIjFuOzA6VU4jMyUhIzwkIjJFKTNYKWUkRyg0JSEjPSQiMSg0XT0nSEA3VCEjPCQiMkVKXF9MVXI3JSEjPSQiMm1fWyczPDJVVCEjPSQiMVV4LyMzLHE6JSEjPCQiMWRwV2IvJD48JSEjPCQiMXNoJSlHKWZvPSUhIzwkIjF5YEMtIyp5LFUhIzwkIjJQZldjZD1uQCUhIz0kIjE0US9cemtKVSEjPCQiMUJJV0F0ZFlVISM8JCIxUUElZXAxOkUlISM8JCIxYTlDcGdWd1UhIzwkIjFvMWtVYU8iSCUhIzwkIjF2KVJnIltIMVYhIzwkIjA0UiUqPUM3SyUhIzskIjJhSVFHY2BoTCUhIz0kIjE+dkJPSDNeViEjPCQiMU5uajRCLG1WISM8JCIxXGYuJG9UNFElISM8JCIxa15WYzUoZVIlISM8JCIxclYkKUgvITNUJSEjPCQiMSdlTEshKUhkVSUhIzwkIi9HanciZjFXJSEjOiQiMTs/Ll0mKWViVyEjPCQiMEJKTSN6XnFXISM7JCIxWC8kb0haYVslISM8JCIwbUgtbncuXSUhIzskIjJ1JylHTy8xYF4lISM9JCIxIjNHcVROLWAlISM8JCIxKEhGL3prXmElISM8JCIxNmwjUTslNGdYISM8JCIxRmRBUE4tdlghIzwkIjFVXGk1SCYqKmUlISM8JCIxZFQtJUcjKVtnJSEjPCQiMWpMVWQ7Iik+WSEjPCQiMiV5RCMzLlRaaiUhIz0kIjElekBVU3EnXFkhIzwkIjIlMzVpeCgqZmtZISM9JCIxQy0tXiJIJnpZISM8JCIxUSU+V19lV3AlISM8JCIyQ2w9eSp5UTRaISM9JCIyJWZ5QHJzSkNaISM9JCIxdXFoV21DUlohIzwkIjEqRzshPWc8YVohIzwkIjJNXTo5UjAicFohIz0kIjE+WiJbd01TeSUhIzwkIjFNUkBRVCcqKXolISM8JCIyJVxKaDZOKlEiWyEjPSQiMWNCLCYpRyMpR1shIzwkIjIvZDYlZUF2VlshIz0kIjEneTU9aiJvZVshIzwkIi1AMDVodFshIzgkIjE6IzQneS5hKSlbISM8JCIyL1YzP3ZwTSFcISM9JCIxWHdTRCIqUj1cISM8JCIyOSZvISkpXEdMJFwhIz0kIjFuZz9zeURbXCEjPCQiMSNHMGNDKD1qXCEjPCQiMSdcLyE+bTZ5XCEjPCQiMjlyLkMqZi8kKlwhIz0kIjFGSCFlT3Z6KyYhIzwkIjFUQD9SWiFILSYhIzwkIjFjOGc3VCR5LiYhIzwkIjJDYytnW2pGMCYhIz0kIjF4KCpSZkdwbl0hIzwkIjJDKiopektBaSMzJiEjPSQiMms/KT4xO2IoNCYhIz0kIjFBdWZ6NFs3XiEjPCQiMVBtKkhONXU3JiEjPCQiMV9lUkUoUkI5JiEjPCQiMWZdeio0cHM6JiEjPCQiMXVVPnQlKT5zXiEjPCQiMSpbJGZZeTcoPSYhIzwkIjJNcSMqKj5zMC1fISM9JCIxPj5SJGYnKXBAJiEjPCQiMk04InptZiI+QiYhIz0kIjJ1TSE+U2Alb0MmISM9JCIxYiYqZThaeGhfISM8JCIyMHgpKXAzL25GJiEjPSQiMlcpelFnTWoiSCYhIz0kIi9zeUxHYzFgISM6JCIxOms9MkFcQGAhIzwkIjFIY2UhZUBrTCYhIzwkIjFXWylSJjROXmAhIzwkIjAwJVFGLkdtYCEjOyQiMW1LeSsoNDdRJiEjPCQiMSJbIz11IVJoUiYhIzwkIjEncCJlWiVvNVQmISM8JCIyOiI0KTQjeSpmVSYhIz0kIjJiNyFRJT5GNFcmISM9JCIxVCR6eGNjZVgmISM8JCIxWiZ5NiVmeXFhISM8JCIxaHhkOWByJlsmISM8JCIxeXAoem9XMV0mISM8JCIxIz53ODF1Yl4mISM8JCIxMWF4TU1dSWIhIzwkIjFAWTwzR1ZYYiEjPCQiMmwkUWQiPWkuYyYhIz0kIjFWSShcYiJIdmIhIzwkIjFlQVBHNEEhZiYhIzwkIjJOWnI8SV1eZyYhIz0kIjEpb3FebnoraSYhIzwkIjEtKnAmWyE0XWomISM8JCIxPiJwPlVRKlxjISM8JCIxTCRvYHpuW20mISM8JCIxWnZ3b3J6emMhIzwkIjJYdm1AYUVacCYhIz0kIjImb2ZjOmZsNGQhIz0kIjElPWwqKUcmZUNkISM8JCIxKlJrQm05JlJkISM8JCIxOU93TlNXYWQhIzwkIjAkRzs0TVBwZCEjOyQiMVc/YyN5LVZ5JiEjPCQiMERoZjpLIyp6JiEjOyQiMWwvT0g6OzllISM8JCIwb2ZGITQ0SGUhIzskIjJiKillaEY/UyVlISM9JCIxNiJlJlwnXCplZSEjPCQiMUR0JkgtelEoZSEjPCQiMGFjalIzKSkpZSEjOyQiMmx1YihweHQuZiEjPSQiMjAnXDpWcm09ZiEjPSQiMXdUYjtsZkxmISM8JCIxIlJgKiopZV9bZiEjPCQiMTFFTmpfWGpmISM8JCIxQD12T1lReWYhIzwkIjJsLl4sLDlMKmYhIz0kIjFWLWIkUVYjM2chIzwkIjFlJVxwdnNKLSchIzwkIjFzJ1suOC0iUWchIzwkIjEpKXl1LjouYGchIzwkIjEucjl4Myd6MSchIzwkIjE8amFdLSpHMychIzwkIjFKYiVSaT55NCchIzwkIjB1V3QqKltGNichIzskIjFhUnVxJHl3NychIzwkIjFwSjlXeGdVaCEjPCQiMSRRVXY2UHY6JyEjPCQiMiYpZlQ0XG1DPCchIz0kIjE4M01rZVIoPSchIzwkIjFGK3VQX0staSEjPCQiMU4jUjZoYXNAJyEjPCQiMFhRWClSPUtpISM7JCIxa3ckek44ckMnISM8JCIwKW9MSkYvaWkhIzskIjEmNE9aNXNwRichIzwkIjBKTiJ5OSE+SCchIzskIjFDWGBeMyRvSSchIzwkIjFKUCRcQWc8SychIzwkIjFaSEwpZipvT2ohIzwkIjFpQHRyKj07TichIzwkIjF3ODhYJFtsTychIzwkIjBmSSY9eFoiUSchIzskIjEyKUg+NDJrUichIzwkIjAtSGBZTzhUJyEjOyQiMUcjRyhRZUVFayEjPCQiMVV1NzdfPlRrISM8JCIxZG1fJmVDaFgnISM8JCIxc2UjKmVSMHJrISM8JCIxJzNEQkwkKWZbJyEjPCQiMS1WczBGIjRdJyEjPCQiMTxON3o/JWVeJyEjPCQiMUtGX185eElsISM8JCIxUT4jZiMzcVhsISM8JCIxXzZLKj5JMWMnISM8JCIxcC5zcyZmYmQnISM8JCIxJGU+aCUqKVshZichIzwkIjEoej0mPiQ9YWcnISM8JCIxOCE9SHBaLmknISM8JCIxRnNKbXFGTm0hIzwkIjFNa3JSaz9dbSEjPCQiMVtjNjhlOGxtISM8JCIxa1teJz1sK28nISM8JCIxelMiKmZYKlxwJyEjPCQiMSRIOEwkUiMqNG4hIzwkIjEzRHIxTCZbcychIzwkIjFDPDYhbyN5Um4hIzwkIjAkNF5gP3JhbiEjOyQiMVksInBVVCdwbiEjPCQiME80LiEzZCV5JyEjOyQiMXgmM1A8KyYqeichIzwkIjB6MnJhSFcibyEjOyQiMTFxXT8qZSRIbyEjPCQiMEExUkgpR1dvISM7JCIxRmFJbndAZm8hIzwkIjFVWXFTcTl1byEjPCQiMWNRNTlrMiopbyEjPCQiMXNJXSh5MFMhcCEjPCQiMShHLTQ7Tio9cCEjPCQiMSw6SU1YJ1EkcCEjPCQiMTsycTJSeltwISM8JCIxQioqNCJHQlAncCEjPCQiMVAiKlxhRWx5cCEjPCQiMWAkKSp5LSNlJCpwISM8JCIxbnZILDleM3EhIzwkIjEkeSdwdTJXQnEhIzwkIjEoKmY0WyxQUXEhIzwkIjE4X1xAJipIYHEhIzwkIjE9VypbKilHI29xISM8JCIxTU9IbyNlSjMoISM8JCIxXEdwVHczKTQoISM8JCIxaj80OnEsOHIhIzwkIjF5N1wpUVl6NyghIzwkIjElXCEqPXd2RzkoISM8JCIxNCgqR05eIXk6KCEjPCQiMUEqKW8zWHRzciEjPCQiMUoiKTMjKVFtKD0oISM8JCIxV3RbYktmLXMhIzwkIjBjJykpR0VfPHMhIzskIjF0ZEctP1hLcyEjPCQiMCpcb3Y4UVpzISM7JCIxL1UzXDJKaXMhIzwkIjBVJFtBLEN4cyEjOyQiMUVFKWVccEBIKCEjPCQiMVU9R3ApKTQydCEjPCQiMWQ1b1UjRz9LKCEjPCQiMXItMzt3JnBMKCEjPCQiMSdbeiUqKXApPU4oISM8JCIvKHlHTztvTyghIzokIjE7ekZPZHUiUSghIzwkIjFAcm40Xm4nUighIzwkIjFOajIkWy87VCghIzwkIjFfYlpjUWBFdSEjPCQiMW1aKClIS1lUdSEjPCQiMSIpUkYuRVJjdSEjPCQiMSg+dG0oPktydSEjPCQiMTdDMl04RCdbKCEjPCQiMT07WkIyPSx2ISM8JCIxTDMobzQ1aF4oISM8JCIxWytGcSVSNWAoISM8JCIxayNwTyUpb2ZhKCEjPCQiMXclb3FAKSozYyghIzwkIjEkcG4vZkZlZCghIzwkIjEycCdRJ3B2IWYoISM8JCIxOWhFUGpvMHchIzwkIjBMbDFyOjFpKCEjOyQiMVZYMSUzWGJqKCEjPCQiMHdqdVh1L2woISM7JCIxdUgnMyRRU2x3ISM8JCIwPmlVP0wubyghIzskIjEwOW14REUmcCghIzwkIjBoZzUmPj41eCEjOyQiMUUpZldLQF5zKCEjPCQiMC9meXBdK3UoISM7JCIxYiNlNzIhKVx2KCEjPCQiMFpkWVc0KnB4ISM7JCIxJW9jIT0pUVt5KCEjPCQiL2ZYIj5vKCp6KCEjOiQiMTJeJltjKHA5eSEjPCQiMUBWRFFwaUh5ISM8JCIxT05sNmpiV3khIzwkIjB2X11vJltmeSEjOyQiMW4+WGVdVHV5ISM8JCIxIj1ePVZXJCopeSEjPCQiMSdSXV8hUUYveiEjPCQiMS0nXCd5Sj8+eiEjPCQiMTwpWz9iS1QkeiEjPCQiMUshW2EjPjFceiEjPCQiMVlzJSkpSCIqUid6ISM8JCIxamtDczEjKnl6ISM8JCIxeGNrWCsmUSp6ISM8JCIxIypbLz4leigzISkhIzwkIjExVFcjejNQLSkhIzwkIjE6TCVlO1EnUSEpISM8JCIxSERDUnZjYCEpISM8JCIxVzxrN3BcbyEpISM8JCIxZTQvJ0dFTTMpISM8JCIxdCxXZmNOKTQpISM8JCIxKFFSRy4mRzgiKSEjPCQiMS4nUWlTOSNHIikhIzwkIjAieWp6UDlWIikhIzskIjFEcS5gSjJlIikhIzwkIjBDT2tfLUk8KSEjOyQiMWFhJCkqKj0kej0pISM8JCIxcllCdDcnRz8pISM8JCIxJilRalkxejwjKSEjPCQiL0ouPytzSyMpISM6JCIxMUJWJFJcd0MpISM8JCIxQDokb3d5REUpISM8JCIxSDJCUyIzdkYpISM8N2BqbCQiMXU3JGZlIVt4JCkhIz0kIjBfbSxWeCZHJikhIzwkIjFsPFN1VW56JykhIz0kIjAsUCc9NnhJKSkhIzwkIjFzQChHJ3onPSkqKSEjPSQiMTt1NTJbJ0g4KiEjPSQiMWlFTV47MSVHKiEjPSQiMTN6ZCZcZV5WKiEjPSQiMWBKIilSYEQnZSohIz0kIjEnUltTPV90dCohIz0kIjFWT0dHIVwlKSkpKiEjPSQiMSopPUQoZWFSKyIhIzwkIjEwYW5yVTE+NSEjPCQiMidIKik0Y1I8TTUhIz0kIjJRWEEwayRHXDUhIz0kIjIneWYlXEskUms1ISM9JCIySl1wJDRJXXo1ISM9JCIydy0keiRwN1k0IiEjPSQiMkBiOyN5QnM0NiEjPSQiMiVvK2tpPyRbNyIhIz0kIjJHZmpxdVQqUjYhIz0kIjJzNihbSjkwYjYhIz0kIjFVMSJmNmgsPCIhIzwkIjJsO00uITNGJj0iISM9JCIxInBkWlshUSs3ISM8JCIyYUAiPXAsXDo3ISM9JCIyO3QvTyYpKmZJNyEjPSQiMWMjRyFRJjRkQyIhIzwkIjIzeV5DQT4zRSIhIz0kIjEwYChvISpHZkYiISM8JCIyKUgpKUgiZlE1SCIhIz0kIjJVTkFkRltoSSIhIz0kIjF6ZTlnekRAOCEjPCQiMSZScFhrbmpMIiEjPCQiMiU+SCoqR3RaXjghIz0kIjFXa1Q4cWVtOCEjPCQiMiVvKlJ5cCdwIlEiISM9JCIyS1xqQVExb1IiISM9JCIyeSwob21nIj5UIiEjPSQiMkFhNTZ2RHFVIiEjPSQiMiNlU2BOYThVOSEjPSQiMkZlZCo+XkNkOSEjPSQiMnU1IlEvW05zOSEjPSQiMj1qLykpW2t1WyIhIz0kIjJrOkdLPHVEXSIhIz0kIjIzb153JlFvPDohIz0kIjJfP3Y/YSR6SzohIz0kIjI7cylcRUshemEiISM9JCIya0NBNCJILGo6ISM9JCIyMHhYYGZBInk6ISM9JCIyX0hwKHpBQiRmIiEjPSQiMic+Rz5rPk0zOyEjPSQiMVdqaFs7WEI7ISM8JCIxcClSSUxoJlE7ISM8JCIxJlFqdSxyT2wiISM8JCIyJzRwKT1xIXlvOyEjPSQiMlBWNWpRISpRbyIhIz0kIjIlZVJ0cSsrKnAiISM9JCIyTltkXnY0VHIiISM9JCIydysiZVIlPiNIPCEjPSQiMUtYK0MiSFZ1IiEjPCQiMVshRyUzKVElZjwhIzwkIjJLZF5HXFtYeCIhIz0kIjJ0NHZzPGUnKnkiISM9JCIxQScpcGh5dy89ISM8JCIybzlBaGF4KT49ISM9JCIyM25YMEIoKVwkPSEjPSQiMmM+cFwicDRdPSEjPSQiMTdGUipmMV8nPSEjPCQiMmtCO1FHOy4pPSEjPSQiMjB3UiNvZlUmKj0hIz0kIjJfR2pFbE4wIj4hIz0kIjInNG8zUGBrRD4hIz0kIjJXTDU6LWIyJT4hIz0kIjIpZVEkZnFrZSY+ISM9JCIxdnROIVJ1NCg+ISM8JCIyJCoqM3l1UzMnKT4hIz0kIjFDVz9mUD4sPyEjPCQiMilbemlWTUk7PyEjPSQiMXQ5MEdKVEo/ISM8JCIydypcWjdHX1k/ISM9JCIxQSYpKm9cSzsxIyEjPCQiMmsvQTg9VW4yIyEjPSQiMWpidWw9Jj00IyEjPCQiMnQzcCxiaHA1IyEjPSQiMTdFZk03MkFAISM8JCIyazg7IT40PVBAISM9JCIxaCdSTWchSF9AISM8JCIyYz1qeUcrdTsjISM9JCIwcidHcyo0RD0jISM7JCIxRS1yYyc+dz4jISM8JCIyMHZMNk1IRkAjISM9JCIyYEZkYi1SeUEjISM9JCIyJCp6ISkqNChbSEMjISM9JCIyV0svV1JlIWVBISM9JCIyKVt5Iyl5IW9KRiMhIz0kIjJLUF5Ld3gjKUcjISM9JCIyJCopW25adVEuQiEjPSQiMTklKTRLclw9QiEjPCQiMilRPl87b2dMQiEjPSQiMktZWDRdOyhbQiEjPSQiMncpKm9gPUVRTyMhIz0kIjJDXiN6cGUkKnlCISM9JCIybC47VWJYU1IjISM9JCIxYCZSJ1FfOjRDISM8JCIydDJqSSNcRUNDISM9JCIxLW1bMllQUkMhIzwkIjFFLCI+SCVbYUMhIzwkIjFeT0x3UmZwQyEjPCQiMmM8ZDJtLlpbIyEjPSQiLzI9WEwiKSpcIyEjOiQiMTtVZ0hJI1xeIyEjPCQiMVR4LTlGLklEISM8JCIyYEVeJSlSVV5hIyEjPSQiMHp1RzNfLWMjISM7JCIyW0opSG48T3ZEISM9JCIxUj1zXjlaIWYjISM8JCIyTE9YaDgiZTBFISM9JCIyJHopbzAjM3A/RSEjPSQiMlBTIypcXStlaiMhIz0kIjFIZlQqPTU0bCMhIzwkIjJFWFJRKCk+Z20jISM9JCIxeUhFZSZINm8jISM8JCIxLWxvVSNSaXAjISM8JCIxRis2RipbOHIjISM8JCIyO2JMOmhla3MjISM9JCIydDFkZkhvOnUjISM9JCIxI2YhUSEpem5jRiEjPCQiMTtUIVttKHlyRiEjPCQiMVR3QVx0Km95IyEjPCQiMmM7Xk8uMj8hRyEjPSQiMHB1IT1uNjxHISM7JCIxOSMpXC1rQUtHISM8JCIxSjwjcDNPdCVHISM8JCIyYERYOHhYQydHISM9JCIweW9kWGJ2KEchIzskIjEvQj5TXm0jKkchIzwkIjFIZWhDW3gySCEjPCQiMk9OUiE0WClHI0ghIz0kIjJ4KEdZJD4lKnokSCEjPSQiMSVSJyl5KFE1YEghIzwkIjIjPSo0QmM4I29IISM9JCIyRVdMbkNCTClIISM9JCIyeCdwOkpIVikqSCEjPSQiMSNcIWU6RWE4SSEjPCQiMTxTKytCbEdJISM8JCIyO2FGVyk+d1ZJISM9JCIydDBeKW87KCllSSEjPSQiMSNldUtOIilSMiQhIzwkIjExIilwUDU0KjMkISM8JCIyO2pAQHMrVTUkISM9JCIyZDpYbFM1JD5KISM9JCIwb280ND9XOCQhIzskIjEwQVJ2KEgmXEohIzwkIjFAZCIpZiVSWTskISM8JCIxWCNSVTlcKHpKISM8JCIweGknRyllWz4kISM7JCIxJUgnMzgmbyo0SyEjPCQiMT4pNHY+eV1BJCEjPCQiMk9NTD4peT1TSyEjPSQiMW9vTm12SGJLISM8JCIyTVEheV1zU3FLISM9JCIxM1I/TnBeJkckISM8JCIyT1ZGJz5taStMISM9JCIxZTQwL2p0OkwhIzwkIjJEW3UlKSlmJTNMJCEjPSQiMmwrKSpHbmJmTSQhIz0kIjFKOktkYDFoTCEjPCQiMVpddVRdPHdMISM8JCIxcyZvaHMlRyJSJCEjPCQiMmw0I2Y1V1IxTSEjPSQiMUBjLCY0LzpVJCEjPCQiMVkiUiV6UGhPTSEjPCQiMG5pUVlCPFgkISM7JCIxJj4nR1tKJG9ZJCEjPCQiMTYoNEYkRyU+WyQhIzwkIjFOSzg8RDAoXCQhIzwkIjB3Yzo/aUBeJCEjOyQiMSVHISlmKT1GRk4hIzwkIjInNFFTcTpRVU4hIz0kIjFNdCNbRCJcZE4hIzwkIjFlM0RSNGdzTiEjPCQiMkRRdU9pNXhlJCEjPSQiMSkqeTQzLiNHZyQhIzwkIjFDOV8jKipIemgkISM8JCIxW1wlcG5SSWokISM8JCIxcyVvOE9cIltPISM8JCIxJyo+elghZkttJCEjPCQiMUBiQEkobyR5TyEjPCQiMVkhUllUeU1wJCEjPCQiMWlEMSo0KWUzUCEjPCQiMSczJ1skeShwQlAhIzwkIjE2JzR6WTIpUVAhIzwkIjJhOExCOjxSdiQhIz0kIjBtY24kby1wUCEjOyQiMSY9IT1AbDgleSQhIzwkIjE0UGcwaUMqeiQhIzwkIjJhQUYrKmVOOVEhIz0kIjB2XVdkbCVIUSEjOyQiMXZVKCllX2RXUSEjPCQiMSl6KEhWXG9mUSEjPCQiMUM4c0ZZenVRISM8JCIxW1s5N1YhKiopUSEjPCQiMkRQb2wqUiwwUiEjPSQiMSopPSo0b0IsI1IhIzwkIjE5YVRsTEJOUiEjPCQiMVEqUSlcSU1dUiEjPCQiMWlDRU1GWGxSISM8JCIxJylmbz1DYyEpUiEjPCQiMTYmNEo1c2MqUiEjPCQiMU9JYCh5Ink1UyEjPCQiMV9sJj5aIiplLSUhIzwkIjF3K1FjNitUUyEjPCQiMSxPITMlMzZjUyEjPCQiMmE3Rl9fPzcyJSEjPSQiMGxdJzQtTCczJSEjOyQiMXZUMiUqKVI5NSUhIzwkIjInKnAoXHkmXGw2JSEjPSQiMmFAQEhFZjs4JSEjPSQiMHVXdCUqb245JSEjOyQiMWwjbzxqeT07JSEjPCQiMSl5Ij47JCkpcDwlISM8JCIxOWBoKyEpNCM+JSEjPCQiMVEpUV1vMnM/JSEjPCQiMkRPaSVwdEpBVSEjPSQiMm0pZSlRMEZ1QiUhIz0kIjEvJTQkUW5gX1UhIzwkIjFHSHRBa2tuVSEjPCQiMV9rOjJodiNHJSEjPCQiMXcqejp6bHlIJSEjPCQiMSxOK3dhKEhKJSEjPCQiMUVxVWdeM0dWISM8JCIwYl1bJVs+VlYhIzskIjJtMXUjSFhJZVYhIz0kIjEiZihwOFVUdFYhIzwkIjJhNkAiKSpRXylRJSEjPSQiMGtXRGVMT1MlISM7JCIxbCJvcEVWKD1XISM8JCIwcCJSXkgmUVYlISM7JCIyV0A6ZWppKltXISM9JCIwdFEtS3NTWSUhIzskIjFhQW0vPz16VyEjPCQiMXpkMypvIkglXCUhIzwkIjEvJDROUCwlNFghIzwkIjFHRyR6MDZYXyUhIzwkIjJETmNCdT8nUlghIz0kIjF5KXpuVUlaYiUhIzwkIjElUi43NlMpcFghIzwkIjE9cGkmelxcZSUhIzwkIjFVLzAhW2YrZyUhIzwkIjFtUlprInBeaCUhIzwkIjI5XCgqKVspeS1qJSEjPSQiMTs1S0wmKVFYWSEjPCQiMGFXeEApXGdZISM7JCIybTBvQCF6Z3ZZISM9JCIxImUiZidlPDJwJSEjPCQiMmE1OjVGRmVxJSEjPSQiMiZIJ1FhJnAkNHMlISM9JCIxYkAnKVJtL09aISM8JCIxemNHQ2o6XlohIzwkIjEvIzQoM2dFbVohIzwkIjImPkY4JHB2OHklISM9JCIxV2lieGBbJ3olISM8JCIxcCh6PjEmZjZbISM8JCIxJUgua3UvbiNbISM8JCIxPW8jM1Y5PSVbISM8JCIyRU1dXzZDcCZbISM9JCIxblFuKnpMPyhbISM8JCIxJVEoNCVbVnIpWyEjPCQiMTI0X29KRC1cISM8JCIxS1clSCZHTzxcISM8JCIybSZ6T1BEWktcISM9JCIyOVsiekBBZVpcISM9JCIxMV1AMT5waVwhIzwkIjBgUTFmLHkoXCEjOyQiMm0vaV1GNkgqXCEjPSQiMXJiW2Y0LTNdISM8JCIyYTQ0UmtJSi0mISM9JCIyJj5FTEcuQ1FdISM9JCIxWGh2NytOYF0hIzwkIjFwJ3pycGYlb10hIzwkIjElPi47UXBOMyYhIzwkIjImPW4tbSF6Jyk0JiEjPSQiMU0tWF0oKXk4XiEjPCQiMWVQKFtWKSopR14hIzwkIjElRyhIPiIzUzkmISM8JCIxMzNzLnk2Zl4hIzwkIjFMVjkpW0ZVPCYhIzwkIjFkeWNzckwqPSYhIzwkIjI5USIqcCZvVy9fISM9JCIxKSpbVFRsYj5fISM8JCIxQSVRZUFtWUImISM8JCIxWT5FNWZ4XF8hIzwkIjF0YW8lZiYpW0UmISM8JCIxKCoqMyJ6Xyoqel8hIzwkIjImPkRgalw1JkgmISM9JCIxV2cmems5LUomISM8JCIyOWN6QkxDYEsmISM9JCIyYjMubyxNL00mISM9JCIyJjRtQSxQYWJgISM9JCIxTSxsJlFgMVAmISM8JCIyL210KzJqZFEmISM9JCIxJT0oXGFGKDNTJiEjPCQiMTMyIypRQylmVCYhIzwkIjFDVU1CQDRKYSEjPCQiMVx4dzI9P1lhISM8JCIxdTc+I1w2OFkmISM8JCIxKXo5bTxAa1omISM8JCIxQiRRNSczYCJcJiEjPCQiMnUlPVlYMGsxYiEjPSQiMjlQJikpSC12QGIhIz0kIjEpKSkzViIqZm9gJiEjPCQiMTdDdClmcD5iJiEjPCQiMnUkZjokR3pxYyYhIz0kIjI5WXp2JyopPSNlJiEjPSQiMmIpSCtfJylIKGYmISM9JCIxNmxVTyQzQ2gmISM8JCIxTismMy09dmkmISM8JCIyOWJ0X3FGRWsmISM9JCIyYjIocCpRUHhsJiEjPSQiMSwxN3VxJUduJiEjPCQiMURUYWVuJnpvJiEjPCQiMVx3J0hXbUlxJiEjPCQiMlg8IlJGaDw9ZCEjPSQiMicpcDk9ImVHTGQhIz0kIjJFQVFpXCZSW2QhIz0kIjIlUTxtIT0wTncmISM9JCIxal8zbFtoeWQhIzwkIjInKXkzJlxYcyR6JiEjPSQiMkVKS1JCTSkzZSEjPSQiMU9lTj1SJVIjZSEjPCQiMWkkekZnYCFSZSEjPCQiMSgpRz8oR2pUJmUhIzwkIjEta2lySEZwZSEjPCQiMUUqXGdsI1ElKWUhIzwkIjFfTVpTQlwqKmUhIzwkIjJiKHAqWy0tWSJmISM9JCIyJypcPyQ0PHJIZiEjPSQiMk8tV1BSQFslZiEjPSQiMjBibiJ5NSQqZmYhIz0kIjJiMSJmaTIvdmYhIz0kIjInKmU5cVddLCpmISM9JCIyTzZROThnXysnISM9JCIxUjsnZSIpcC4tJyEjPCQiMWpeRysmemEuJyEjPCQiMSlvM1o9KmVdZyEjPCQiMkZASyJwKSlwbGchIz0kIjFIZGJgJjMzMychIzwkIjFgI3p6Qj1mNCchIzwkIjF5RlNBei02aCEjPCQiMkZJRW9nUGg3JyEjPSQiMnUjKVw3SFo3OSchIz0kIjI6TnRjKHBOY2ghIz0kIjJiKG80Z21ZcmghIz0kIjJGUj9YTXdsPSchIz0kIjJ1IlIlKkdnbyxpISM9JCIyOlduTHImejtpISM9JCIyYic0eihSMD5CJyEjPSQiMSJcOUEzOnFDJyEjPCQiMTshUW13Q0BFJyEjPCQiMVI6MV5XQnhpISM8JCIxYl1bTlRNI0gnISM8JCIwZTMqPlFYMmohIzskIjEvQEwvTmNBaiEjPCQiMGpiKCk9dHdMJyEjOyQiMWEiekooR3lfaiEjPCQiMXlFZ2REKnlPJyEjPCQiMS5pLVVBKyRRJyEjPCQiMT0oXGsjPjYpUichIzwkIjFYSygzaEBLVCchIzwkIjFubkgmSEokR2shIzwkIjEkSD8oejRXVmshIzwkIjE6UTlrMWJlayEjPCQiMVR0Y1subXRrISM8JCIxbTMqSC5xKClbJyEjPCQiMSNROXVyelFdJyEjPCQiMTJ6JD1TKikqPWwhIzwkIjFKOUUnMyo0TWwhIzwkIjFkXG9xKDMjXGwhIzwkIjBbM15YPVZjJyEjOyQiMTA/YFIiRyV6bCEjPCQiMGBiUiN5YCVmJyEjOyQiMWAheiQzdms0bSEjPCQiMGQtRz5kWmknISM7JCIxJTRFcyhvJylSbSEjPCQiMGlcO2N3XGwnISM7JCIxV0oyWWkzcW0hIzwkIjBuJ1xJZj4mbychIzskIjEkPj9caDAucSchIzwkIjE8UE0qSDphcichIzwkIjFMc3ckKVxfSW4hIzwkIjFkMj5vWWpYbiEjPCQiMSVHOUVOVzJ3JyEjPCQiMTJ5LlBTJmV4JyEjPCQiMUo4WUBQJzR6JyEjPCQiMWJbKWVTdGchbyEjPCQiMFEzLjQkPUBvISM7JCIxKCo9dHVGSE9vISM8JCIxQWE6ZkNTXm8hIzwkIjFZKnlOOTdsJ28hIzwkIjFyQytHPWkiKW8hIzwkIjElKmZVNzp0JypvISM8JCIxPiZcbz5UPSJwISM8JCIxWElGIikzJnAjcCEjPCQiMGMncGwwMVVwISM7JCIxJTM/LERxciZwISM8JCIwaFZYJCp6QShwISM7JCIxTXInKj0nKlEoKXAhIzwkIjFlMVIuJCpcLXEhIzwkIjEkPTl5KSozdywoISM8JCIxMXhCcyc9Ri4oISM8JCIxRDdtYyRHeS8oISM8JCIxWlozVCFRSDEoISM8JCIxdCMzYnNaIXlxISM8JCIxKHpKKjR1OiQ0KCEjPCQiMUBgTiU0biMzciEjPCQiMVkpeSh5blBCciEjPCQiMXBCP2prW1FyISM8JCIxKCllaVpoZmByISM8JCIxNyVcPyRlcW9yISM8JCIxUEhaO2IiUT0oISM8JCIwWScqMz9EKik+KCEjOyQiMSYpKj5gKVsuOXMhIzwkIjBeVihwWDlIcyEjOyQiMUxxO2FVRFdzISM8JCIxZjBmUVJPZnMhIzwkIjF1UyxCT1p1cyEjPCQiL3dWMkxlKkcoISM6JCIxQzYnPSpIcC90ISM8JCIxW1lHd0UhKT50ISM8JCIxdCIzMk83XEwoISM8JCIxKHBKXi9BK04oISM8JCIxQl9iSDw4bHQhIzwkIjFQKHlSVFQtUSghIzwkIjFrQVMpNF5gUighIzwkIjEoeURHeWcvVCghIzwkIjE2JFxzWXFiVSghIzwkIjFRR25eLG9TdSEjPCQiME8nNE8pKnlidSEjOyQiMScpKT4wXyoqM1ooISM8JCIxLU0lXD80Z1soISM8JCIxRXBPKikpPTZdKCEjPCQiMV4venQmR2leKCEjPCQiMXZSQGUjUThgKCEjPCQiMSpcUEUleldZdiEjPCQiMUQ1MUZ3Ymh2ISM8JCIwYiVbNnRtd3YhIzskIjFrITNmKnB4ImYoISM8JCIxKWVKLm8nKW9nKCEjPCQiMTledmtqKj5pKCEjPCQiMVEneSJcZzVQdyEjPCQiMWpAZ0xkQF93ISM8JCIxKW9EIT1hS253ISM8JCIxOCNcQzVOQ28oISM8JCIxRkYob3lXdnAoISM8JCIxYGlIcldsN3ghIzwkIjF4KD5kOmt4cyghIzwkIjEsTDlTUShHdSghIzwkIjFFb2NDTil6dighIzwkIjFcLioqM0s0dHghIzwkIjF3UVQkKkc/KXkoISM8JCIxI1JQeWQ3TCF5ISM8JCIxPDRFaUFVPXkhIzwkIjBXJW9ZPmBMeSEjOyQiMWx6NUo7a1t5ISM8JCIwXEpiSl5QJ3khIzskIjE4XSYqKio0Jyl5eSEjPCQiMVImeVZvcVIqeSEjPCQiMWE/ISlvLjM0eiEjPCQiMXpiQWArPkN6ISM8JCIxLyJcd3QqSFJ6ISM8JCIxR0UyQSU0VyZ6ISM8JCIxYGhcMSI+JnB6ISM8JCIxeSc+NHpHWSl6ISM8JCIxLUtNdiVRKCoqeiEjPCQiMTxud2YiW1ssKSEjPCQiMVYtPld5JipIISkhIzwkIjFuUGhHdjFYISkhIzwkIjEiSFBJQHgsMSkhIzwkIjE9M1koKm9HdiEpISM8JCIwTSUpPWUnUiE0KSEjOyQiMW15SW1pXTAiKSEjPCQiMSpRSjImZmg/IikhIzwkIjExXDpOY3NOIikhIzwkIjFKJXkmPmAkMzopISM8JCIxYj4rL10lZjspISM8JCIxemFVKW9hNT0pISM8JCIxMCFcR1BraD4pISM8JCIwYHNzMHU3QCkhIzskIjFgZ3BUUFFFIykhIzwkIjFwJj5oVSRcVCMpISM8JCIxJTRWMDYubUQpISM8JCIxPW0nXHo3PEYpISM8JCIxVSxSekMjb0cpISM8JCIxb08iUTtLPkkpISM8JCIxIz5QI1s9LzwkKSEjPCQiMTwybUs6OkskKSEjPCQiMUpVMzw3RVokKSEjPCQiMWV4XSw0UGkkKSEjPCQiMXQ3JGZlIVt4JCkhIzw3YGpsJCIxJm90RHU7YVkpISM9JCIxRFVuNCcqND0nKSEjPSQiMWpaeHdDeXEoKSEjPSQiMS1gKFFNbE0jKikhIz0kIjFkZCg0QFtoMiohIz0kIjEoSHcheTUkKUcjKiEjPSQiMU1vPFhSXiJRKiEjPSQiMXh0RjdvPk0mKiEjPSQiMTt6UHonem9vKiEjPSQiMWEleWthaSZSKSohIz0kIjEkKip5TlRYQSoqKiEjPSQiMkwmejFHR1w5NSEjPSQiMicpKnp4OTZ3SDUhIz0kIjJFMClbLCVIXS8iISM9JCIybDUpPilvKEhnNSEjPSQiMjI7M1woZmN2NSEjPSQiMlhAPTtFTTM0IiEjPSQiMiRvI0ckW0Q1MTYhIz0kIjJCS1FdJDNQQDYhIz0kIjJ6T1s8N1JtOCIhIz0kIjI+VWUlM3UhPjoiISM9JCIyZFpvXnB2cjsiISM9JCIyJ0gmeT0pUlcjPSIhIz0kIjJPZSllb0FyKD4iISM9JCIyd2opSGIwKUhAIiEjPSQiMjlwMz8lKVsjRzchIz0kIjFQKD0oR3JeVjchIzwkIjEiekdhVCZ5ZTchIzwkIjJeJSlRQHFgU0YiISM9JCIyJykqKVspKSk+SypHIiEjPSQiMkYmKmViRiFmLzghIz0kIjJuK3BBY2UpPjghIz0kIjI0MXoqW283TjghIz0kIjJpNSpvTl5SXTghIz0kIjIqZiIqUkFNbWw4ISM9JCIxOSM0IjQ8JDRRIiEjPCQiMnhFPmUqKio+J1IiISM9JCIyPEtIREdvOVQiISM9JCIxdyRSI3BsdEU5ISM8JCIyJ0glXGYmWytVOSEjPSQiMXYlZkU5dHNYIiEjPCQiMiJIJnAkSDlhczkhIz0kIjJKZXpncjR5WyIhIz0kIjJzaip5LSF5SV0iISM9JCIxInAqXCpHWSQ9OiEjPCQiMVgoNGlkOU9gIiEjPCQiMikpej5IJ0cpKVs6ISM9JCIyVyUpSCdcNjprOiEjPSQiMiYpKilSalY+JXo6ISM9JCIyQyYqXElzKG8lZiIhIz0kIjJpK2coNGcmKjQ7ISM9JCIwMXFrSENfaSIhIzskIjE5LD0kZSNcUzshIzwkIjFvLCopcDN3YjshIzwkIjJPQCttOkg1biIhIz0kIjJ2RTVMVyhIJ28iISM9JCIyOEs/K3RsOnEiISM9JCIxdi50O1Mkb3IiISM8JCIyKEgvVy5CNUs8ISM9JCIxJFtdLGZxdHUiISM8JCIxUDAnbygpUUV3IiEjPCQiMSRlcU47Mnp4IiEjPCQiMm5qIUddYTwkeiIhIz0kIjIxcCEqcHRWJTM9ISM9JCIyWnUrUC03UCM9ISM9JCIyJyl6NS9KISkqUT0hIz0kIjJDJjM3KGZbVSY9ISM9JCIxMTQkUSlvXnA9ISM8JCIyPSY0YXFeeSUpPSEjPSQiMTE1RGRNMCs+ISM8JCIyJmY1J1J1QGAiPiEjPSQiMkw2cjEuIWZJPiEjPSQiMW42UTwkZWUlPiEjPCQiMjhBIjQvbTdoPiEjPSQiMXc3ITMqW1J3PiEjPCQiMjJLNnY8ajsqPiEjPSQiMlhQQFVZSnArIyEjPSQiMihHOSQ0dio+QT8hIz0kIjJFW1R3Lm91LiMhIz0kIjJrYF5WS09GMCMhIz0kIjIxZmg1aC8hbz8hIz0kIjJXa3J4KkdGJDMjISM9JCIyJClwIlslPVQmKTQjISM9JCIxVzw+ciU0UTYjISM8JCIyd3osenZ4IUhAISM9JCIyPSY9aFdnTVdAISM9JCIyZCE+S0pWaGZAISM9JCIyJmY+Lj1FKVs8IyEjPSQiMkwsVVohNDohPiMhIz0kIjJ2MV85Pj5hPyMhIz0kIjJGNmkieXVvP0EhIz0kIjFuQChbd2JmQiMhIzwkIjIyQSNlXlNBXkEhIz0kIjF2QUhRQlxtQSEjPCQiMihHQitEMXciRyMhIz0kIjEkUTc8IipHcUgjISM8JCIyb1ZBJSk+KEg3QiEjPSQiMSNbS15bbHZLIyEjPCQiMU9EJT14TEdNIyEjPCQiMGZfJmU/NWVCISM7JCIyUWtpX01xTFAjISM9JCIxKXBzPmpRJylRIyEjPCQiMV9Gbz1wIVJTIyEjPCQiMmQhR1IwXzw+QyEjPSQiMjomRzUjXFZXViMhIz0kIjEwSCIpeTxyXEMhIzwkIjFmSF9sKylcWSMhIzwkIjE4SUJfJFstWyMhIzwkIjFuSSUqUW1eJlwjISM8JCIxQEpsRFx5NUQhIzwkIjF2Sk83SzBFRCEjPCQiMjBBdCEqXEA4YSMhIz0kIjF1S3kmeSplY0QhIzwkIjJ5SyRccyFlPWQjISM9JCIyQlEuI2ZqNyhlIyEjPSQiMmVWOGZrJVItRSEjPSQiMigqW0JFJEhtPEUhIz0kIjJVYUwkPjckSGojISM9JCIwZlZnXSo+W0UhIzskIjJLa2BGem5NbSMhIz0kIjJ4cGolemd0eUUhIz0kIjFeUDxtVislcCMhIzwkIjEwUSlHbHMjNEYhIzwkIjInZlFmUjRhQ0YhIz0kIjJHIlJJRSM0KVJGISM9JCIxblIsOHYyYkYhIzwkIjJELEMoKnpYLngjISM9JCIybTFNazM5Y3kjISM9JCIyMDdXSlAjKTMhRyEjPSQiMlY8YSlmMTo7RyEjPSQiMUdVY1kqPTkkRyEjPCQiMkNHdUtCKG9ZRyEjPSQiMmlMJSkqPmImPidHISM9JCIyOVElcDFRQXhHISM9JCIyX1YvTTQjXCMqRyEjPSQiMigqWzksUWd4IUghIz0kIjJPYUNvbUdJI0ghIz0kIjJ5Zk1OJnBIUUghIz0kIjI7bFctQ2xOJkghIz0kIjJicWFwX0wpb0ghIz0kIjIxdmtPIj01JSlIISM9JCIxMFtQKyxQKipIISM8JCIyKGVbMyhRUVksJCEjPSQiMkQiXHp0bSEqSEkhIz0kIjFuXF1nXDxYSSEjPCQiMUBdQFpLV2dJISM8JCIyVzJEUmA2ZDIkISM9JCIwN04xIyl6NDQkISM7JCIxdV5NMiJbaTUkISM8JCIxR18wJVI7OjckISM8JCIxI0dsMm8leU9KISM8JCIyY0x2dSdIMF9KISM9JCIwUiY9YTdLbkohIzskIjFXYSozYSplIz0kISM8JCIyJipbMHcjeSZ5PiQhIz0kIjJFYTpWNkVKQCQhIz0kIjEoZkQ1UyVSR0shIzwkIjFeY3Qob2lPQyQhIzwkIjJicVhXKDQkKmVLISM9JCIxZmQ6aCMqPnVLISM8JCIyRCJlJ3lhbiUqRyQhIz0kIjFlZWRNZXQvTCEjPCQiMkUiZkdAVCs/TCEjPSQiMmsnZip6U3NfTCQhIz0kIjAtMVpwUzBOJCEjOyQiMXVnVCIpKjNlTyQhIzwkIjFHaDdvczIiUSQhIzwkIjEjPU9bYlhqUiQhIzwkIjFGaWFUUWg2TSEjPCQiMSNHYyNHQClvVSQhIzwkIjFPaidcVF1AVyQhIzwkIjImKlF3O3E9dVgkISM9JCIxVmtRKSlwb3NNISM8JCIxKFwnNHZfJnpbJCEjPCQiMV9sIT1jQktdJCEjPCQiMShmOyZbPVw9TiEjPCQiMi9sRV84Z1BgJCEjPSQiMS9uJD5VRyFcTiEjPCQiMWVuazNuSGtOISM8JCIxNm9OJipcY3pOISM8JCIyaydvMSNHTFtmJCEjPSQiMCNweG86NTVPISM7JCIxdnBbYilwYGkkISM8JCIyJz5xPlUiUTFrJCEjPSQiMk4yMipHayFmbCQhIz0kIjFGcmg6WjxyTyEjPCQiMSM9RkIrVmtvJCEjPCQiMU9zLipHNjxxJCEjPCQiMiYqR1pkZHpwciQhIz0kIjFXdFhpeUNLUCEjPCQiMSpRbiJcaF5aUCEjPCQiMVZ1KGVWJXlpUCEjPCQiMSdcKGVBRjB5UCEjPCQiMGIoSDQ1SyR6JCEjOyQiMTB3KydIKmUzUSEjPCQiMWV3ciNlZFEjUSEjPCQiMTd4VXBlN1JRISM8JCIydnZQaDolUmFRISM9JCIxNnklR1dpJ3BRISM8JCIybCd5YkgyJFwpUSEjPSQiMT56RTshKj4rUiEjPCQiMk4oeihISW5hIlIhIz0kIjJ1LSlvKmVOMiRSISM9JCIxIjMpUndRK1lSISM8JCIxRiIzSjtzNydSISM8JCIyMT09KVwvYXdSISM9JCIyV0JHbHQzPSpSISM9JCIxKkdRSy14cSslISM8JCIxVSRbKjRgTUFTISM8JCIybVJlbWY4dy4lISM9JCIyMFhvTCk9KUcwJSEjPSQiMSdceSs8XSJvUyEjPCQiMGIpeWMlPU0zJSEjOyQiMlBnKVxWbm8pNCUhIz0kIjJ2bDMtLmJSNiUhIz0kIjE2KD1wSkIjSFQhIzwkIjFsKEdPZyJcV1QhIzwkIjE+KVEuKilmKGZUISM8JCIyWCcpW3E8R108JSEjPSQiMT4qZVBZJ0ghPiUhIzwkIjJPKCpvL3ZrYj8lISM9JCIxRiF6ci5MM0ElISM8JCIyMTMqKVFLLGhCJSEjPSQiMlc4KmY1J3A4RCUhIz0kIjEpPTR0KnlqbVUhIzwkIjFVIz5TPTE+RyUhIzwkIjEpR0gyWnVySCUhIzwkIjFVJFJ1dlVDSiUhIzwkIjEnUlxULzZ4SyUhIzwkIjFcJWYzTHpITSUhIzwkIjEvJnB2aFojZVYhIzwkIjFlJnpVIWZedFYhIzwkIjI5aCopND4leSlRJSEjPSQiMWQnKnB4QzAvVyEjPCQiMTYoNFd3PyQ+VyEjPCQiMWwoPjYwKmVNVyEjPCQiMT4pSHlMZClcVyEjPCQiMXQpUlhpRF5ZJSEjPCQiMUYqXDciUlIhWyUhIzwkIjEiKSpmej5pY1wlISM8JCIxRStuJVtJNF4lISM8JCIwMyFRcigpPkVYISM7JCIxTSw0ZXFZVFghIzwkIjIlKT0rW01ObmIlISM9JCIxVS1eSk8rc1ghIzwkIjEnSD8jPT5GKGUlISM8JCIwTklcP1NEZyUhIzskIjJhUlM7XDN5aCUhIz0kIjFcL055bjJMWSEjPCQiMS8wMWxdTVtZISM8JCIxZDB4XkxoalkhIzwkIjI5aCFbUTspKXlZISM9JCIxbDE+RCpcVHAlISM8JCIyJT0yIT5APSU0WiEjPSQiMWsyaClcJ29DWiEjPCQiMiY9M0smeWEqUlohIz0kIjF0My5zSUFiWiEjPCQiMUY0dWU4XHFaISM8JCIwKTRYWCdmZHklISM7JCIxTTU7S3otLFshIzwkIjIlKTNyKT1pSDtbISM9JCIxTTZlMFhjSlshIzwkIjEpPSJII3pLbyVbISM8JCIyO0MsIXo1NWlbISM9JCIyYUg2ZE9wdChbISM9JCIxXDhVX3dqIypbISM8JCIxLjk4UmYheiFcISM8JCIyd1hUZUF1SiNcISM9JCIxLjpiN0RXUVwhIzwkIjFkOkUqejVQJlwhIzwkIjE2OyhmM3oqb1whIzwkIjFrO29zdEMlKVwhIzwkIjImPTxSZmNeKipcISM9JCIxdDw1WVJ5OV0hIzwkIjFFPSJHQl8rLiYhIzwkIjFzPV8+MEtYXSEjPCQiMmMjPkIxKSllZ10hIz0kIjApPiVINGRlMiYhIzskIjFMP2x6YDciNCYhIzwkIjEpM2lqbSRSMV4hIzwkIjI7OXNJJj5tQF4hIz0kIjEnPiN5Ui0kcDgmISM8JCIxXEFcRSYpPl9eISM8JCIxJkgtSyJvWW5eISM8JCIyKFtCIioqNE5GPSYhIz0kIjJEU0FtUS4hKT4mISM9JCIxY0NMdDtGOF8hIzwkIjBeVSsnKlImR18hIzskIjJhY19uQzNRQyYhIz0kIjInPUVZTGwyZl8hIz0kIjJNbXMsI1tNdV8hIz0kIjE8RilvNTgnKkcmISM8JCIxckZmJFIiKVtJJiEjPCQiMUZHSSFvXCxLJiEjPCQiMClHLG56VE5gISM7JCIxTUhzYGlvXWAhIzwkIjEoKUhWU1gmZk8mISM8JCIxTkk5RkdBIlEmISM8JCIxKDNgUTYiXCdSJiEjPCQiMVRKYyslZjxUJiEjPCQiMSY+dHNvRnFVJiEjPCQiMiVcSylSKGZIVWEhIz0kIjEuTHBnVWNkYSEjPCQiMmtOLnVhS0daJiEjPSQiMS1NNk0zNSlbJiEjPCQiMWRNIzM3cExdJiEjPCQiMTZOYDJ1aj1iISM8JCIyTWNWVXAwUmAmISM9JCIxPU8mNClSPFxiISM8JCIxc09tbkFXa2IhIzwkIjJjc3RWYjUoemIhIz0kIjFzUDNUKXlcZiYhIzwkIjFDUXpGckM1YyEjPCQiMiZ6UV05YV5EYyEjPSQiMUxSQCxQeVNjISM8JCIybClSI3opPjBjYyEjPSQiMVVTanUtS3JjISM8JCIyYzRXOGMpZSdvJiEjPSQiMi85YSFbbyY9cSYhIz0kIjElPmtaOERyciYhIzwkIjFcVVpATVJLZCEjPCQiMkVJJT0zPG1aZCEjPSQiMmxOJSpbKipISHcmISM9JCIwVC87Ryk+eWQhIzskIjFrV0pvbFkkeiYhIzwkIjE9WC1iW3QzZSEjPCQiMk5jTTw5LlMjZSEjPSQiMTxZV0c5RlJlISM8JCIxclk6OihSWCZlISM8JCIya3NrPSszKXBlISM9JCIxelpkKUd3XSllISM8JCIxTVtHdlhNK2YhIzwkIjEoKVsqPidHaDpmISM8JCIyTSRccVs2KTMkZiEjPSQiMScpXFROJVxoJWYhIzwkIjFUXTdBeFRoZiEjPCQiMSY0TikzZ293ZiEjPCQiMVxeYSZIYT4qZiEjPCQiMSxfRCNlQXMrJyEjPCQiMWRfJypvM1xBZyEjPCQiMS1gbmIiZnguJyEjPCQiMWNgUVV1LWBnISM8JCIwVCY0SGRIb2chIzskIjFrYSFlLGtOMychIzwkIjJ1XjpESUspKTQnISM9JCIxc2JBKmUrVDYnISM8JCIxRWMkZigpbyRIaCEjPCQiMXNja2lyaldoISM8JCIyV3NiJFxhISpmaCEjPSQiMid6ZDFPUDx2aCEjPSQiMUxleEE/VyE+JyEjPCQiMm0pZVs0LnIwaSEjPSQiMjAlZj4nZnk0QSchIz0kIjElKmYhSClvQ09pISM8JCIwLzsncF5eXmkhIzskIjElNEVqWCR5bWkhIzwkIjFaaC5WPDAjRychIzwkIjEtaXVIK0soSCchIzwkIjFiaVg7JCllN2ohIzwkIjBKbUpnY3lLJyEjOyQiMWpqKCkqKVs3VmohIzwkIjE0a2V3SlJlaiEjPCQiMWtrSGo5bXRqISM8JCIxPWwrXShIKilRJyEjPCQiMGQ7bi4pPi9rISM7JCIxRW1VQmpZPmshIzwkIjF6bTg1WXRNayEjPCQiMUtuJW8qRytdayEjPCQiMXhuYiQ9cl9ZJyEjPCQiMU1vRXElUjBbJyEjPCQiMScpbyhwdjJlXCchIzwkIjAlcG9WZzI2bCEjOyQiMSUqcFJJVk1FbCEjPCQiMVtxNTxFaFRsISM8JCIxLnIiUSE0KW9iJyEjPCQiMVxyXyE+XEBkJyEjPCQiMSxzQnh1VChlJyEjPCQiMWJzJVJ3Jm8tbSEjPCQiMEpkMTBhemgnISM7JCIxanRPUEJBTG0hIzwkIjE8dTJDMVxbbSEjPCQiMXN1eTUqZVBtJyEjPCQiMUR2XCg+RiF6bSEjPCQiMXJ2PyVbJkglcCchIzwkIjFCdyI0eGomNG4hIzwkIjF6d2lkPyRbcychIzwkIjFLeExXLjVTbiEjPCQiMSh5WjVqb2B2JyEjPCQiMVR5djxwanFuISM8JCIxJSp5WS9fIWZ5JyEjPCQiMVJ6PCJcdDYhbyEjPCQiMSUqeil5eFRrIm8hIzwkIjFbISlmaytySm8hIzwkIjEsIjM4TnlwJW8hIzwkIjFjIj0hUW1DaW8hIzwkIjE0I0daI1xeeG8hIzwkIjFrI1E5QCR5IypvISM8JCIxMyRbIilcXiEzcCEjPCQiMWokZVt5PkwjcCEjPCQiMTslbzoyKWVRcCEjPCQiMXIleSNlaiZRJnAhIzwkIjFEJikpXGtDInBwISM8JCIxeSYpcEpIUiUpcCEjPCQiMUwnMyU9N20qKnAhIzwkIjF5Jz1eXUhcLCghIzwkIjFLKEc9eig+SXEhIzwkIjEmeVEmeWdZWHEhIzwkIjFUKVtfT00yMSghIzwkIjElKillPmwtZzIoISM8JCIxWypvJ1E0RiI0KCEjPCQiMSwhemBBUmw1KCEjPCQiMVshKjM3diE9NyghIzwkIjEtIip6KXp2cTgoISM8JCIxYiI0YjNXQjooISM8JCIxNCM+QVA3dzsoISM8JCIxayNIKmUxKUc9KCEjPCQiMTwkUmMlKlsiKT4oISM8JCIxciRcQkI8TUAoISM8JCIxOyVmIT5ib0dzISM8JCIxciVwZCFRJlJDKCEjPCQiMUMmekM0QSNmcyEjPCQiMXkmKj16Llx1cyEjPCQiMUsnKiplbWUoKkcoISM8JCIxKW80RSZwLTB0ISM8JCIxUig+JFJfSD90ISM8JCIxI3pIZ19qYkwoISM8JCIwJSlSRiI9JDNOKCEjOyQiMSYqKVwlKjQraE8oISM8JCIxWSpmaFFvOFEoISM8JCItKEduT21SKCEjOCQiMWIrZWZcIT5UKCEjPCQiMDYhSFlLPEZ1ISM7JCIxaSwrTDpXVXUhIzwkIjE0LXI+KTR4WCghIzwkIjFpLVUxInlIWighIzwkIjE7LjgkUlkjKVsoISM8JCIwUFMpelleLnYhIzskIjFFL2JtSHk9diEjPCQiMXkvRWA3ME12ISM8JCIxSzAoKlImPiRcdiEjPCQiMXgwb0V5ZWt2ISM8JCIwaiFSOGgmKXp2ISM7JCIxJm8rLFNDXmYoISM8JCIxVDIib28jUjV3ISM8JCIxJHo/Tig0bUR3ISM8JCIxWjNCZyNINGsoISM8JCIxLTQlcGEoPmN3ISM8JCIxWzRsTGVZcnchIzwkIi5oLjdNbm8oISM5JCIxYTUyMkMrLXghIzwkIjE0NnkkcHFzcighIzwkIjFpNlwhKSpRRHQoISM8JCIxPTc/bnMheXUoISM8JCIxcjciUmJ2SXcoISM8JCIxOzhpU1FNeXghIzwkIjFwOExGQGgkeighIzwkIjFCOS85LykpM3khIzwkIjF5OXYrKFtUI3khIzwkIjFKOlkoKXBUUnkhIzwkIjEnZXJURiZvYXkhIzwkIjBrIikzY2AqcHkhIzskIjEmbyJmWj1BJil5ISM8JCIxUTxJTSxcK3ohIzwkIjEkejY1VWVkInohIzwkIjFaPXMybi1KeiEjPCQiMS0+ViUqXEhZeiEjPCQiMWI+OSJHajoneiEjPCQiMTM/JnljSm8oeiEjPCQiMWE/Y2EpKjQjKnohIzwkIjE0QEZUIm90KykhIzwkIjFpQCl6VU9FLSkhIzwkIjE6QXA5WiF6LikhIzwkIjFyQVMsSTxgISkhIzwkIjFCQjYpR1QlbyEpISM8JCIxeEIjW2Q0UDMpISM8JCIxQUNgaHkoKik0KSEjPCQiMXlDQ1toQzkiKSEjPCQiMUpEJlxWOSZIIikhIzwkIjElZWk7cyN5VyIpISM8JCIxUkVQMzUwZyIpISM8JCIxJHAjMyZIPmA8KSEjPCQiMVlGeiJlKGUhPikhIzwkIjEsR11vZSZlPykhIzwkIjFZR0BiVDdAIykhIzwkIi9IIz5XI1JPIykhIzokIjFhSGpHMm1eIykhIzwkIjEzSU06IUhwRSkhIzwkIjFoSTAtdD4jRykhIzwkIjE8SncpZWx1SCkhIzwkIjFwSlp2UXQ3JCkhIzwkIjE6Sz1pQCtHJCkhIzwkIjFvSyopWy9GViQpISM8JCIxQ0xnTihRJmUkKSEjPCQiMXdMSkFxIVFQKSEjPCQiMUtNLTRgMipRKSEjPCQiMSZbTGRmVlZTKSEjPCQiMVFOVyMpPWg+JSkhIzwkIjEkZWAicCwpW1YpISM8JCIwa2plWFssWCkhIzskIjEmb3REdTthWSkhIzw3YGpsJCIxbGUxVSZHTGEpISM9JCIxUEgrS21UKHApISM9JCIxNCslPnMvOiYpKSEjPSQiMSIzeD0iR2YwISohIz0kIjFvUyI9ITRvZiIqISM9JCIwOV48KipvUEoqISM8JCIwQClvIjNkeVkqISM8JCIxJEdEOzxYPmkqISM9JCIxYEJjaEsudygqISM9JCIxRCUqXF44N0kqKiEjPSQiMipcTzlXNFUzNSEjPSQiMnBOUEp2SFEtIiEjPSQiMmMwSkBjUSNSNSEjPSQiMkZ3QzZQWlkwIiEjPSQiMFo9LD1jKzIiISM7JCIydDw3IiopXFkmMyIhIz0kIjJYKWU1KXp0MzUiISM9JCIyOmYqNDJFRzs2ISM9JCIyKSlIJDQ7OXBKNiEjPSQiMnQqcDNELTVaNiEjPSQiMlpxITNNITREOyIhIz0kIjI8VHVJJXkiejwiISM9JCIyKj0ibz9sRUw+IiEjPSQiMUU9MWhhdDM3ISM8JCIyS2BiK0ZXVEEiISM9JCIyL0NcIXpJYlI3ISM9JCIxUkgvKSk9J1xEIiEjPCQiMmxrT3FwcS5GIiEjPSQiMkxOSWddemRHIiEjPSQiMjIxQ11KKT0sOCEjPSQiMnl3PFM3KGY7OCEjPSQiMXY5LExmK0s4ISM8JCIyQT0wP3U5dU0iISM9JCIyNCkpKSo0YkJHTyIhIz0kIjEpZSMqKmZCQnk4ISM8JCIyX0gnKSpvNmskUiIhIz0kIjJCKyEpeigqXCE0OSEjPSQiMik0UChweWVXVSIhIz0kIjJtVG5mZm4pUjkhIz0kIjJUN2hcU3dfWCIhIz0kIjJGI1smUkAmb3E5ISM9JCIyKEgmW0gtJTQnWyIhIz0kIjJzQlU+JEddLDohIz0kIjJVJWYkNGs2cF4iISM9JCIxXidIKlwvS0s6ISM8JCIyJ2VMIyplI0h4YSIhIz0kIjJkMTx6MVFKYyIhIz0kIjJWdzVwKG9heTohIz0kIjI9Wi9mb2JSZiIhIz0kIjIneSIpKltcayQ0OyEjPSQiMmUpPSpRSXRaaSIhIz0kIjEkZiYpRzYjPVM7ISM8JCIvJHo9IzRmYjshIzokIjJ0K3QzdCoqNG4iISM9JCIyaXFtKVImM2tvIiEjPSQiMTgvJylbdCI9cSIhIzwkIjIxN2F5OkVzciIhIz0kIjJ1I3klbydcaks8ISM9JCIxTjolZXhWIVs8ISM8JCIyPUNOW2VfTXciISM9JCIyJFwqR1FSaCl5PCEjPSQiMnlrQUc/cVV6IiEjPSQiMmBOOz0seic0PSEjPSQiMkQxNTMjeTNEPSEjPSQiMiVwUCEpSG1cUz0hIz0kIjJsWih6UWEhZiY9ISM9JCIyUD0ielpVSnI9ISM9JCIyNypbeWNJcycpPSEjPSQiMikqZXlkJz04LT4hIz0kIjEoSHNablN2Ij4hIzwkIjJRK21QW1xIJD4hIz0kIjE2KGZGSGUkWz4hIzwkIjE9TXYscndqPiEjPCQiMmQ3WjIiZjx6PiEjPSQiMUwzdT5aZSUqPiEjPCQiMjlgTShHTioqND8hIz0kIjImUSNHeEwtYS0jISM9JCIyYSU+c1k2IjMvIyEjPSQiMWBjcmIqPmkwIyEjPCQiME80WndHOzIjISM7JCIydDEuUGRQcTMjISM9JCIyV3gncCNRWUM1IyEjPSQiMjhbIXAiPmJ5NiMhIz0kIjIwPSVvK1NFTEAhIz0kIjJ0KXluNEduW0AhIz0kIjJYZnInPTsza0AhIz0kIjI8SWx3VSFcekAhIz0kIjE0IWZtQioqWz4jISM8JCIxO0ZsWCEzLkAjISM8JCIyS1VZWSZvckRBISM9JCIxQSxramM3VEEhIzwkIjIkSFFqc1dgY0EhIz0kIjFPdmkiR1Y+RiMhIzwkIjJPQ0AxNF90RyMhIz0kIjIzJlxoKiozdy1CISM9JCIxZSczJzMocCI9QiEjPCQiMl9PLXdeeU5MIyEjPSQiMlAxJ2ZFdCkqW0IhIz0kIjIweCplTmhSa0IhIz0kIjF5TWVXXCEpekIhIzwkIjJfPXhOdjhfUiMhIz0kIjJHKjNkaURpNUMhIz0kIjInKmZrOlBKZ1UjISM9JCIyb0llMD1TOVcjISM9JCIyYytfJiopKltvWCMhIz0kIjJEclgmKXpkQVojISM9JCIwVVJ2Z213WyMhIzskIjJzN0xsVHZJXSMhIz0kIjJXJG9fRFVbPUQhIz0kIjFVMF9NSSpRYCMhIzwkIjIlW1VeVj1JXEQhIz0kIjJzJXpdXzFya0QhIz0kIjFhO11oJT4sZSMhIzwkIjI7TyZccSNHYmYjISM9JCIxcCEqW3pxJDRoIyEjPCQiMmp4I1spKWVNRUUhIz0kIjJHW3d1cGE8ayMhIz0kIjA+cWtdanJsIyEjOyQiMSopUVk6QmRzRSEjPCQiMSdmZFc3Iil6byMhIzwkIjJOSV5NJCoqUS5GISM9JCIwLFhDdSl6PUYhIzskIjE9KFE5YjJVdCMhIzwkIjFEQ1ZnamhcRiEjPCQiMUtoVXBeLWxGISM8JCIyJlIpPiV5UlYheSMhIz0kIjFRTlQoeVVleiMhIzwkIjJiQzJrZl43IkchIz0kIjJCJjRTMC9tRUchIz0kIjImZllSOSNwPyVHISM9JCIyak8pUUIheXUmRyEjPSQiMXU/UUtvKUcoRyEjPCQiMjl5djhrJkgpKUchIz0kIjBbcC5YL1AhSCEjOyQiMm49aiRmSzY+SCEjPSQiMlkqb05vP19NSCEjPSQiMjNnXXQoMyQqXEghIz0kIjIkM1ZNJ29SYCdIISM9JCIxOyFRYFxbMilIISM8JCIyQnNKVklkaCpIISM9JCIxQGFLOGhjNkkhIzwkIjFIIj5CI1wocC0kISM8JCIyXyRHSkpQUVVJISM9JCIyRmExLmEjemRJISM9JCIyMUQrJFw4P3RJISM9JCIydSZSSGUsaCkzJCEjPSQiMlltKEduKj1TNSQhIz0kIjJOTyJHd3hVPkohIz0kIjIxMnZfZU9bOCQhIz0kIjJ2eG9VUlgtOiQhIz0kIjEmW2lLP2FjOyQhIzwkIjEjPmNBLGo1PSQhIzwkIjIlKiopXDcjPVonPiQhIz0kIjExT0NJMSk9QCQhIzwkIjEwdEJSJSpHRkshIzwkIjI6LEojWyMpcFVLISM9JCIwc0NzMDIiZUshIzskIjFFJT1pJ2VedEshIzwkIjFNQEB2WSMqKUckISM8JCIwJWU/JVtMVkkkISM7JCIxWyYqPiRIVSg+TCEjPCQiMVlLPi02Ok5MISM8JCIxYXA9NipmME4kISM8JCIyOW0hPT8ob2ZPJCEjPSQiMW9WPEh2UCJRJCEjPCQiMXYhbyJRanknUiQhIzwkIjJFeWhyOSY+N00hIz0kIjBcYmgmUmdGTSEjOyQiMicpPVxedzdJVyQhIz0kIjJhKkc5dTpVZU0hIz0kIjEubTgkUUlRWiQhIzwkIjBKSUA+UiMqWyQhIzskIjJtLEM2K1tZXSQhIz0kIjFDeDY1bzA/TiEjPCQiMUs5Nj5jWU5OISM8JCIwODAiR1coM2IkISM7JCIxUCkpNFBLR21OISM8JCIyWWEjNFk/cCJlJCEjPSQiMjlEJzNiMzUoZiQhIz0kIjFmKnpTbTREaCQhIzwkIjFtTzJ0JT16aSQhIzwkIjF0dDEjR0ZMayQhIzwkIjAzaDU0TyhlTyEjOyQiMXpaMCtcOXVPISM8JCIxKFtbITRQYipvJCEjPCQiMSQ+VSE9RCdccSQhIzwkIjIwIWYuRjhQP1AhIz0kIjEzJ0hnOCF5TlAhIzwkIjE6TC1YKik9XlAhIzwkIjJDLTxTdihmbVAhIz0kIjFAMixqbCsjeSQhIzwkIjImR1crc2BUKHokISM9JCIyWTgpKjQ9Q0ciUSEjPSQiMVU9KioqKUhCR1EhIzwkIjBiJikqKXpUTyVRISM7JCIybER6emddIWZRISM9JCIxa0gocFRmVyhRISM8JCIyRG1tZkFvKSopUSEjPSQiMiVwLidcLnhfIVIhIz0kIjF4UyZSJWVvP1IhIzwkIjJXeVpIbCU0T1IhIz0kIjEiXFQ+WS46JlIhIzwkIjEpPk40RjdwJ1IhIzwkIjJjISpHKno1SyMpUiEjPSQiMS9FIyopKSlIeCpSISM8JCIxN2oienBRSiwlISM8JCIyJj0rInBdWiZHUyEjPSQiMUVQIWZKY1IvJSEjPCQiMUx1Kls3bCRmUyEjPCQiMDkiKlEkUnh1UyEjOyQiMVtbKUd1Iz0hNCUhIzwkIjFZJnk9YiJmMFQhIzwkIjFgQSgzTys1NyUhIzwkIjAnZicpcCI0azglISM7JCIyd21mKXl6Ij06JSEjPSQiMlhQYHl5RXM7JSEjPSQiMSMzWm9mTkU9JSEjPCQiMiYqeVNlU1chKT4lISM9JCIxKFtNW0BgTUAlISM8JCIxJj5HUS1pKUdVISM8JCIyQyE+I0ckM0ZXVSEjPSQiMiYzYyI9a3onZlUhIz0kIjE8JDQzWCkzdlUhIzwkIjJPLS4pZnNcIUglISM9JCIxSm56b2chZkklISM8JCIxUS96eFtKQFYhIzwkIjFQVHknb0JuTCUhIzwkIjFXeXgmXEtATiUhIzwkIjFeOngvOGFuViEjPCQiMiVlX3c4LCZIUSUhIz0kIjFsKmVGIyplJClSJSEjPCQiMk1uXzx0blBUJSEjPSQiMid6anVTbDxIVyEjPSQiMXkrdVxgZVdXISM8JCIxJ3lMKGVUKipmVyEjPCQiMSRcRngnSFN2VyEjPCQiLzdzdzwiM1wlISM6JCIydiFcciZlP2ldJSEjPSQiMk9oM1pSSDtfJSEjPSQiMUFCcS4jUXFgJSEjPCQiMi8tJ3A3cVdfWCEjPSQiMUcoKm9AZSZ5YyUhIzwkIjFNTW9JWUUkZSUhIzwkIjFVcm5STW4pZiUhIzwkIjIlWzNuW0EzOVkhIz0kIjFjWG1kNVxIWSEjPCQiMk5FZW0nKSoqW2slISM9JCIxaj5sdiczLm0lISM8JCIxcGNrJVs8ZG4lISM8JCIxdyRST0hFNnAlISM8JCIxJDNMRTVObHElISM8JCIxInpFOyJSJT5zJSEjPCQiMSlcPzFzX3R0JSEjPCQiMTBVaEg6d19aISM8JCIxLnpnUS48b1ohIzwkIjE2O2daInpOeSUhIzwkIjE9YGZjeikqKXolISM8JCIyYi0qZWxuUjlbISM9JCIxS0ZldWIhKUhbISM8JCIxUmtkJFE5XyVbISM8JCIydTlxRD5CMSdbISM9JCIxWFFjLD8ud1shIzwkIjJNYmQwIjNXIipbISM9JCIyJmY3Yj4nXG8hXCEjPSQiMW9cYUclZUEjXCEjPCQiMXUnUXZCbnckXCEjPCQiMjlRS2wvd0kmXCEjPSQiMSozRWImW1tvXCEjPCQiMnZ5PlhtJCpRKVwhIz0kIjElXDhOWi0kKipcISM8JCIxLXNdI0c2WiwmISM8JCIxMzRdIjQ/LC4mISM8JCIxO1lcKypHYi8mISM8JCIxQiQpWzR4JDQxJiEjPCQiMjEuI1s9bE13XSEjPSQiMiVHZFpGYHYiNCYhIz0kIjFPJXBrOGtyNSYhIzwkIjFWSllYSGRBXiEjPCQiMCZvWGE8KXo4JiEjOyQiMWUwWGowUmBeISM8JCIyWUVXQ1Aqem9eISM9JCIxc3pWIj0zVT0mISM8JCIxejtWISpwaCo+JiEjPCQiMnZQRCUqekRdQCYhIz0kIjEmMz4lM1lWSV8hIzwkIjEkejd1VFZlQyYhIzwkIjIlKlwxa0FfN0UmISM9JCIxMS1TTjVtd18hIzwkIjE5UlJXKXA/SCYhIzwkIjIxaShRYCd5dUkmISM9JCIxPjhRaXUpR0smISM8JCIxRl1QcmlIUWAhIzwkIjJOdG8uMzBQTiYhIz0kIjFVQ08qKVE2cGAhIzwkIjFbaE4pcEFYUSYhIzwkIjJhJilcdF1KKipSJiEjPSQiMWpOTTsuTTphISM8JCIxaXNMRCJcMlYmISM8JCIxcDRMTXo6WWEhIzwkIjF2WUtWbmNoYSEjPCQiMkVRPUJidnBaJiEjPSQiMSI0NzhPJVEjXCYhIzwkIjIkKXowLjwkejJiISM9JCIyWF0qSHo+P0JiISM9JCIxL0tIKXk1J1FiISM8JCIyMCJwRyhmPlNiJiEjPSQiMTwxRzElRyVwYiEjPCQiMmNLdV9AUFtlJiEjPSQiMkMub1UtWS1nJiEjPSQiMidRPEVMW2w6YyEjPSQiMVlhRFVPMUpjISM8JCIxWCJcN1hza2smISM8JCIyOSZHQ2c3KT1tJiEjPSQiMGNPI3ArSHhjISM7JCIxbi1CeSkpcCNwJiEjPCQiMXRSQShvMiIzZCEjPCQiMG88aVw7TnMmISM7JCIyJSlRNl9JRCpRZCEjPSQiMmIzMFU2TVZ2JiEjPSQiMld6KT5CSHVwZCEjPSQiMSxEPks8OiZ5JiEjPCQiMTRpPVQwYytlISM8JCIxOip6LE5wZiJlISM8JCIxQk88ZiJ5OCRlISM8JCIwTG4ib3B5WWUhIzskIjFPNTt4ZD5pZSEjPCQiMU9aOidlL3coZSEjPCQiMVUlW15SOEkqZSEjPCQiMi86VVQ/QSUzZiEjPSQiMWRlODg1JFEjZiEjPCQiMk1jSEAjKVIjUmYhIz0kIjI7RkI2altZJmYhIz0kIjF6cDZTdTBxZiEjPCQiMnduNSJcaVkmKWYhIz0kIjElUS8iZV0oMysnISM8JCIxJDQpNG5RRztnISM8JCIxKnoiNHdFcEpnISM8JCIxMGIzJlssci8nISM8JCIxOSN6U0g1RDEnISM8JCIxQEgyLiI+ejInISM8JCIxPm0xN3pLJDQnISM8JCIxRS4xQG50M2ghIzwkIjFLUzBJYjlDaCEjPCQiMi91WiFSVmJSaCEjPSQiMVs5L1tKJ1w6JyEjPCQiMWFeLmQ+UHFoISM8JCIxaSlHZ3cheSY9JyEjPCQiMjpjQV1kKj0saSEjPSQiMW9pLCVRKWY7aSEjPCQiMXUqNEk+Mj9CJyEjPCQiMk1vLj8rO3VDJyEjPSQiMFIoKjQiWyNHRSchIzskIjEnNCIqKj5PQnlpISM8JCIxL1spKkdDayRIJyEjPCQiMS8meXpCXiE0aiEjPCQiMTRBKHAvZ1dLJyEjPCQiMTxmJ2YmKW8pUmohIzwkIjFDJ2ZcbXhfTichIzwkIjFKTCZSWidvcWohIzwkIjFRcSVIRyY0J1EnISM8JCIxWTIlPjQvOlMnISM8JCIxVlckNCFIInBUJyEjPCQiMWAiRyo0PEtLayEjPCQiMWU9Iyo9MHRaayEjPCQiMWxiInpLUkpZJyEjPCQiMXQjNHA4WyZ5ayEjPCQiMClIIWYlcCZSXCchIzskIjEobycqW3ZsJDRsISM8JCIxJ1EhKlFjdVpfJyEjPCQiMSU0JSlHUCQ9U2whIzwkIi95KD09I2ZibCEjOiQiMTQ6KDMqNCtybCEjPCQiMTlfJykqejRrZSchIzwkIjFAKmUpMyc9PWcnISM8JCIxSkUmeVRGc2gnISM8JCIxR2olb0FPRWonISM8JCIxTislZS5YIVttISM8JCIxVlAkWyVRWGptISM8JCIxW3UjUWxpKXltISM8JCIxZDYjR1lyVXAnISM8JCIxalsiPUYhbzRuISM8JCIxcyYzMzMqM0RuISM8JCIxekEhKSopeVxTbiEjPCQiMXhmeilwMWZ2JyEjPCQiMSVvKnkyYkpybiEjPCQiMSJSJHk7VnMneSchIzwkIjEqNHhkN0xAIW8hIzwkIjExM3hNPmE8byEjPCQiMThYd1YyJkgkbyEjPCQiMEFlRmJmJFtvISM7JCIwIz52aCRvUCdvISM7JCIxRGN1cXI8em8hIzwkIjFMJFIoemZlJSpvISM8JCIxVEl0KXklKio0cCEjPCQiMVpucyhmLmEjcCEjPCQiMWEvczFDIjMlcCEjPCQiMWlUcjo3QWNwISM8JCIwJ3lxQytqcnAhIzskIjFvOnFMKVFxKXAhIzwkIjF1X3BVd1ctcSEjPCQiMSMpKilvXmsmeSwoISM8JCIxKm8jb2dfRUxxISM8JCIxJ1J3J3BTbltxISM8JCIxLyxueUcza3EhIzwkIjEvUW0obyJcenEhIzwkIjBeZG1cK1w0KCEjOyQiMTs3bDAkNC42KCEjPCQiMUNcazkiPWQ3KCEjPCQiMUonUU8jcDdUciEjPCQiMVBCaktkYGNyISM8JCIxWGdpVFglPjwoISM8JCIxVig+MU5gdD0oISM8JCIxX01oZkB3LXMhIzwkIjFkcmdvNDw9cyEjPCQiMWszZ3goek5CKCEjPCQiMXNYZidlKSkqW3MhIzwkIjF6IyllJlIoUmtzISM8JCIxKCk+ZS9pISl6cyEjPCQiMSVvdk4sOl9IKCEjPCQiMSRScEQjUWk1dCEjPCQiL0pjSkUuRXQhIzokIjExb2JTOVdUdCEjPCQiMTkwYlwtJm9OKCEjPCQiMUBVYWUhZkFQKCEjPCQiMCR6YG55bShRKCEjOyQiMU47YHdtMi51ISM8JCIxTmBfJlsmWz11ISM8JCIxVSE+WEglKlFWKCEjPCQiMVpGXi5KSVx1ISM8JCIxZGtdNz5ya3UhIzwkIjFrLF1AMjchWyghIzwkIjFwUVxJJkhiXCghIzwkIjF4dltSJFE0XighIzwkIjF3N1tbck1FdiEjPCQiMSQpXFpkZnZUdiEjPCQiMSJwb2t3a3JiKCEjPCQiMSlSaWFkdERkKCEjPCQiMTBoWCVRIyl6ZSghIzwkIjE4KVxNPiJSLnchIzwkIjBfVkMrKyk9dyEjOyQiMTxzVjYpM1VqKCEjPCQiMUQ0Vj93aFx3ISM8JCIxS1lVSGstbHchIzwkIjBNPSVRX1YhbyghIzskIjFaP1RaUyVlcCghIzwkIjFhZFNjR0Q2eCEjPCQiMFkqUmw7bUV4ISM7JCIxZkpSdS8yVXghIzwkIjFub1EkR3p1dighIzwkIjF1MFEjNCkpR3goISM8JCIxI0d1OCFwSCl5KCEjPCQiMSkpek81ZHEueSEjPCQiMSdwaCQ+WDY+eSEjPCQiMS9hTkdMX015ISM8JCIxLCJcdDhLKlx5ISM8JCIxM0dNWTRNbHkhIzwkIjE6bExiKFwyKXkhIzwkIjFCLUxrJmVoKnkhIzwkIjAkUkt0dGM2eiEjOyQiMVB3SiM9d3AjeiEjPCQiMVg4SiIqXFFVeiEjPCQiMVVdSStRemR6ISM8JCIwdilINEU/dHohIzskIjFkQ0g9OWgpKXohIzwkIjFraEdGLS0vISkhIzwkIjFzKXppLkglPiEpISM8JCIxek5GWHkkWy4pISM8JCIxJkduVWxZLTApISM8JCIxJyk0RWphbGwhKSEjPCQiMSRwYUFGazUzKSEjPCQiMSlSWzczdGs0KSEjPCQiMTFAQyEqPSk9NikhIzwkIjE6ZUIqcCFIRiIpISM8JCIwX0gjMyYqcFUiKSEjOyQiMUZLQTwkMyJlIikhIzwkIjFEcEBFcl50IikhIzwkIjFOMUBOZiMqKT0pISM8JCIxVVY/V1pMLyMpISM8JCIxWiEpPmBOdT4jKSEjPCQiMWM8PmlCOk4jKSEjPCQiMWlhPXI2Y10jKSEjPCQiMXAieiwpKnBmRSkhIzwkIjF3RzwqeXk4RykhIzwkIjF4bDspZih5J0gpISM8JCIxJEdnclMnPjckKSEjPCQiMCpSOjtfZ0YkKSEjOyQiMSdwWl4tOUlNKSEjPCQiMTA5OU1HVWUkKSEjPCQiMTZeOFY7JFFQKSEjPCQiMT0pR0BYUyMqUSkhIzwkIjE8RDdoI1xZUykhIzwkIjFEaTZxIWUrVSkhIzwkIjAkKjQiem9ZTiUpISM7JCIxUk81KW92M1gpISM8JCIxWnQ0KFwlR20lKSEjPCQiMV81NDFMcCJbKSEjPCQiMHclMzpANShcKSEjOyQiMWUleVMjNF43JikhIzwkIjFtQDJMKD56XykhIzwkIjFtZTFVJkdMYSkhIzw3YGpsJCIxL2tsLUshR2gpISM9JCIwNCVlVVY5bygpISM8JCIxczxeI1smW0IqKSEjPSQiMWElUkNpRSl5ISohIz0kIjFgcU9peDtNIyohIz0kIjFOWkgtKjMmKlEqISM9JCIxPENBVSsmW2EqISM9JCIvLDojPSI+KygqISM7JCIxJnl4P0tLYiYpKiEjPSQiMmxhK2lNKDMsNSEjPSQiMlxKJD5nOWk7NSEjPSQiMkozJz11YjpLNSEjPSQiMVYpeSIpbypvWjUhIzwkIjI3aHJAIVFBajUhIz0kIjIjelY7O3p2eTUhIz0kIjJ5OWQsLiNIJTQiISM9JCIxOypcVDlFKTQ2ISM8JCIyVW9VImUtT0Q2ISM9JCIyRVhOQFAlKjM5IiEjPSQiMkJAR2hbR2s6IiEjPSQiMjApNDcrRSc+PCIhIz0kIjIoW1A2OW5cKD0iISM9JCIycl4xIkczLi43ISM9JCIyYkcqNFVcYz03ISM9JCIyUDAjNGMhKjRNNyEjPSQiMUFbM3FKalw3ISM8JCIyO2V4U0duXkUiISM9JCIyKFwuMilSLDJHIiEjPSQiMiU9SjE3YkInSCIhIz0kIjJtKWUwRSdwPEoiISM9JCIyW2xbK3UudEsiISM9JCIyS1VUUyZ5JEdNIiEjPSQiMjk+TSFvPlBlOCEjPSQiMjYmcC0jMzFSUCIhIz0kIjIkPig+Zz5TJSpRIiEjPSQiMnhbNytKdVxTIiEjPSQiMWNfK0MlMzBVIiEjPCQiMlgtKSp6YFVnViIhIz0kIjJEeiEqPmx3OlgiISM9JCIyMmMkKWZ3NXJZIiEjPSQiMi9Ldyp6W2sjWyIhIz0kIjInKTNwUioqeSIpXCIhIz0kIjJ1Jj0nejU4UF4iISM9JCIyY2lhPkFaI0g6ISM9JCIyUVJaZkwieVc6ISM9JCIyPTtTKlxhSmc6ISM9JCIyLSRIJFJjXGVkIiEjPSQiMHBEem4kUSJmIiEjOyQiMiRlJT0+ejxwZyIhIz0kIjJuQTZmIT5YQTshIz0kIjJaKlIhKj5nKXpqIiEjPSQiMWpuKlE4P05sIiEjPCQiMUomKil5Q2EhcDshIzwkIjImKkgjKT1PKWUlbyIhIz0kIjIjZl0oZVpBLHEiISM9JCIydyN5JykqZWNjciIhIz0kIjJkZmdRcSE+SjwhIz0kIjFrTCZ5IltzWTwhIzwkIjJHOFk9JCplQXciISM9JCIyMyEqUWUvJHp4PCEjPSQiMXA7JClmckskeiIhIzwkIjInR1cjUUZoKTM9ISM9JCIydD48eVEmUkM9ISM9JCIyYCcqND1dSCpSPSEjPSQiMlB0LWVoamEmPSEjPSQiMS1iekh4KjQoPSEjPCQiMEYpeVY9YCcpPSEjOyQiMVE1eWRmMS0+ISM8JCIyIyl6dDwyK3ciPiEjPSQiMm1jbWQ9TUokPiEjPSQiMllMZigqSG8nWz4hIz0kIjEuQHY4Qz9rPiEjPCQiMjkoW3VGbHR6PiEjPSQiMilSd3RUMUYmKj4hIz0kIjIjMy90YlohMywjISM9JCIydjtCKHApUWotIyEjPSQiMU9mciQpSCg9LyMhIzwkIjEvKDN4NDJ1MCMhIzwkIjJGWiw8QFRIMiMhIz0kIjIyQyVwRGBaKTMjISM9JCIxNHFvUiU0UzUjISM8JCIydnh6T2JWJj5AISM9JCIyYmFzd214XTgjISM9JCIyX0lsO3k2MTojISM9JCIyTzJlYyplOW1AISM9JCIxVTNsNCtvIj0jISM8JCIwaFZPNzlzPiMhIzskIjIleWpqUCNbRkAjISM9JCIybzlIO04jR0dBISM9JCIyXyI+aWxrIlFDIyEjPSQiMlluOSd6ME5mQSEjPSQiMVZ1ZyRwJSlbRiMhIzwkIjE2LWcyKT0vSCMhIzwkIjIlekhmQEgmZkkjISM9JCIxW2RlTnFbQEIhIzwkIjJsXnkmXDYtUEIhIz0kIjJYR3JORWJETiMhIz0kIjFXU2N4JCozb0IhIzwkIjJCIm9iIlxCT1EjISM9JCIyMWVcYmdkIipSIyEjPSQiMVxCYT48cDlDISM8JCIydTZOTiRlQUlDISM9JCIyZSl5X1oqZmRXIyEjPSQiMWExX2hTSGhDISM8JCIyTlQ4YjxHb1ojISM9JCIxIz0xJipHaUJcIyEjPCQiMCYqKVwuayp5XSMhIzskIjIkPTxcPDBWQkQhIz0kIjJuWyVbSlknKlFEISM9JCIxYnNaWCgpXGFEISM8JCIyTi1xJWZHLnFEISM9JCIxJHlpTShwYyZlIyEjPCQiMjdiYnUzLDZnIyEjPSQiMiQ+JFs5P05taCMhIz0kIjIlKTNUYUpwQGojISM9JCIxY1FWSE1xWkUhIzwkIjJbaUVNYVBLbSMhIz0kIjJEUj51bHIoeUUhIz0kIjJLOjc5eDBWcCMhIz0kIjIxI1xTJikpUik0RiEjPSQiMiQqbyhSKipSUERGISM9JCIybVghUjgiMzR1IyEjPSQiMmRBJFFGQVdjRiEjPSQiMlAqZlBUaig+eCMhIz0kIjFpKG9gWDV2eSMhIzwkIjI3YGgkcFgvLkchIz0kIjIxSGFMb3kmPUchIz0kIjInZXFNKHo3VCRHISM9JCIxRilSOCJwa1xHISM8JCIyWmZLYC0iPWxHISM9JCIyTU9EJFJeciEpRyEjPSQiMUoiPUxEXGkqRyEjPCQiMiYqKjNKbkx5NkghIz0kIjImZk9JIls8dCNIISM9JCIxR2tIJmZeRyVIISM8JCIxJz4qRzRkUWVIISM8JCIyVic+R0IpPlIoSCEjPSQiMkN0dXMkUlgqKUghIz0kIjI6XW43MCkpXCskISM9JCIxcC1FbEBfP0khIzwkIjIjSElEemkwT0khIz0kIjJzelhLUiFmXkkhIz0kIjJjY1FzXUNyMSQhIz0kIjJMTEo3aWVFMyQhIz0kIjJDNUNfdCM+KTQkISM9JCIyLyhvQFxvczhKISM9JCIxUic0Syc0RUhKISM8JCIxKVItczImeldKISM8JCIxbl4+Ij5ILjskISM8JCIxTXo9MEwnZTwkISM8JCIxLjI9PnVSIj4kISM8JCIxck08TDokcD8kISM8JCIwQ21ya2xDQSQhIzskIjImMyFmNncqKnpCJCEjPSQiMiZvPDp2UWBgSyEjPSQiMmJgVyIqKXoxcEshIz0kIjJZSVBKNS1ZRyQhIz0kIjFzKzg8aTgrTCEjPCQiMjklRzdKLm46TCEjPSQiMGg6XlcvN0wkISM7JCIydVAzImYmUW5NJCEjPSQiMVA2NXRFRmlMISM8JCIxMVI0KHkxeVAkISM8JCIyT24nMyw0TSRSJCEjPSQiMVUlel0sdikzTSEjPCQiMEBzIUgiNFdVJCEjOyQiMXpcMVZLJSpSTSEjPCQiMVp4MGR0WmJNISM8JCIxMjAwcjksck0hIzwkIjF2Sy8mZVhsWyQhIzwkIjFWZy4qcHo/XSQhIzwkIjE2KUdJIlFoPE4hIzwkIjBlQHEjejlMTiEjOyQiMiVbVixUP29bTiEjPSQiMTxyK2JoQGtOISM8JCIxdykqKipvLXZ6TiEjPCQiMlhrIypIUSVHJmYkISM9JCIxN2EpcFw9M2gkISM8JCIyMT15NGhfamkkISM9JCIxXDQoXHMnKT1rJCEjPCQiMT1QJypRM1VkTyEjPCQiMSdbY0gmXCZIbiQhIzwkIjFhI1xwMSpbKW8kISM8JCIyTixVND1CU3EkISM9JCIyRXlNXEhkJj5QISM9JCIyJ1x2IyozOTROUCEjPSQiMic9LiNIX0QxdiQhIz0kIjEoMzhwamZodyQhIzwkIjJhJmUhNHYkcCJ5JCEjPSQiMUMnKSpbJ3lBKHokISM8JCIxJVEiKil5Pnc3USEjPCQiMV5UKUc0J0hHUSEjPCQiMCNwKG8/SVElUSEjOyQiMndvcDNLayRmUSEjPSQiMWRDJ1tWKSpbKFEhIzwkIjFEXyYpW0RWISpRISM8JCIxJCp6JUdtbWYhUiEjPCQiMV8yJW94KzojUiEjPCQiMUBOJDMqWy5QUiEjPCQiMicqR0VbK3BEJlIhIz0kIjFkIT4pPUo1b1IhIzwkIjFFPSJHQlBPKVIhIzwkIjElZi9vTXIiKipSISM8JCIyQ08oemdhcTlTISM9JCIyRDchenUmUi0uJSEjPSQiMCpHeSlvdGQvJSEjOyQiMidlY3gteUloUyEjPSQiMUYlb24iPiVvMiUhIzwkIjEmPmgyLndCNCUhIzwkIjFrUnZXLCJ6NSUhIzwkIjFLbnVlVVdCVCEjPCQiMjpcUkZQeSpRVCEjPSQiMEVLbls3WDolISM7JCIxR11zK20vcVQhIzwkIjEnejxaciFlJj0lISM8JCIxazByR1s2LFUhIzwkIjJNTC5GJSpbbUAlISM9JCIxLGhwY0k9S1UhIzwkIjIvJykpb3FyclpVISM9JCIyJkg7byVHXktFJSEjPSQiMSlSdScpUiZ5eVUhIzwkIjJjO25FXj5WSCUhIz0kIjFNKmZtaWApNFYhIzwkIjEtRmxTeFFEViEjPCQiMXJha2E9IzRNJSEjPCQiMiVRI1Enb2ZYY1YhIz0kIjEqKjRqIzMhKj5QJSEjPCQiMW5QaSc+Q3ZRJSEjPCQiMU5saDUkZUlTJSEjPCQiMS4kNFlVI2Y9VyEjPCQiMXM/Z1FsN01XISM8JCIyLyVbZl8xbVxXISM9JCIxM3dlbVo+bFchIzwkIjFvLmUhKSlHMlslISM8JCIybDh0WCpIRSdcJSEjPSQiMTBmYzNyejZYISM8JCIyRW5lREFKdF8lISM9JCIxVDliT2AnR2ElISM8JCIyJTRVYV0lKlJlWCEjPSQiMXlwYGtOJFJkJSEjPCQiMVEoSCZ5d1kqZSUhIzwkIjExRF8jeixdZyUhIzwkIjF1X14xZmA/WSEjPCQiMVUhMzAtcWdqJSEjPCQiMjEiM11NVGdeWSEjPSQiMXpOXFsjUXJtJSEjPCQiMnVNJ1tpQm4jbyUhIz0kIjJ2NXprWjEjKXAlISM9JCIxdj1aIWZTUHIlISM8JCIyTmtrV3F1I0haISM9JCIxNnVYPSkzW3UlISM8JCIyJ3osWEtITWdaISM9JCIxXEhXWXEoZXglISM8JCIya3JOLzs2OXolISM9JCIxdyVHV0ZYcCFbISM8JCIxWDdVKVF6QyNbISM8JCIxOFNULU4sUVshIzwkIjEieTFraFpOJlshIzwkIjFcJipSSTwzcFshIzwkIjE9QlJXZWglKVshIzwkIjEoMyZRZSpcLCFcISM8JCIxWXlQc1NvOlwhIzwkIjJYaHFqPT03JFwhIz0kIjEjUWouSV9uJVwhIzwkIjIxOmNWVCdHaVwhIz0kIjE9KlskRzAjeShcISM8JCIxKG9UQmthTCpcISM8JCIxY1dMYygpKSkzXSEjPCQiMTpzS3FHVUNdISM8JCIyTikqPlYpcCYqUl0hIz0kIjFfRkopNCJcYl0hIzwkIjBfMEJARDUyJiEjOyQiMSlHKUhFJGZsMyYhIzwkIjFkNUhTTTQtXiEjPCQiMURRR2F2aTxeISM8JCIxJWV3I287O0xeISM8JCIyQ05wQXkmcFteISM9JCIxQUBFJyopSFU7JiEjPCQiMSopW0Q1U3d6XiEjPCQiMndsWlU3KUgmPiYhIz0kIjFEL0NRQSQzQCYhIzwkIjElPkxBTm1qQSYhIzwkIjFpZkFtLyE+QyYhIzwkIjI5cz0tZU11RCYhIz0kIjEiXDZVcG9IRiYhIzwkIjFlVT8zR10pRyYhIzwkIjJsLSg+QXAuL2AhIz0kIjEneio9TzVkPmAhIzwkIjFrRD1dXjVOYCEjPCQiMkNMdlRFUjFOJiEjPSQiMSM0byJ5TDxtYCEjPCQiMCczOyNcMjxRJiEjOyQiMiZHTzoxO0MoUiYhIz0kIjEoUlksc3ZGVCYhIzwkIjJZO1JUJCk0JEdhISM9JCIxTT44W1IlUVcmISM8JCIyOXFDQDF5JGZhISM9JCIyOVk8aDw3XFomISM9JCIxSC02IUhZL1wmISM8JCIydipINS8vKWZdJiEjPSQiMW1kND1YXkBiISM8JCIxTSYpM0snW3FgJiEjPCQiMS04M1lGZV9iISM8JCIxclMyZ282b2IhIzwkIjFKbzF1NGwkZSYhIzwkIjImKmZmISkzJj0qZiYhIz0kIjJsT18/Pz5aaCYhIz0kIjFOXi87TERJYyEjPCQiMlkhei5JdXlYYyEjPSQiMjtuSVNhQDhtJiEjPSQiMVJNLWVjJm9uJiEjPCQiMSo+Oz94KlEjcCYhIzwkIjIlbyozZylRI3pxJiEjPSQiMVA8KyshZU1zJiEjPCQiMS9YKlI2IyoqUWQhIzwkIjJPRigpekFFWHYmISM9JCIxVSspPk1nK3gmISM8JCIwIkcoZlglZiZ5JiEjOyQiMXBiJypwJkc2IWUhIzwkIjFPJGVSb2ltImUhIzwkIjEyNiZ6eic+S2UhIzwkIjF1USU+IjR0WmUhIzwkIjFVbSRmLWxLJ2UhIzwkIjE3JUgqUiIqenllISM8JCIxekAjUkRMViplISM8JCIxWlwiek9uKTRmISM8JCIya3EyPlssYSNmISM9JCIyTVorZmZONCVmISM9JCIyWEMkKik0KHBrJmYhIz0kIjI6LCcpUSNRK3NmISM9JCIxeih5eSR6YCgpZiEjPCQiMGJyPTBzSSsnISM7JCIydUprZTsxJz1nISM9JCIxeHEmKXotOU1nISM8JCIxVylcUVJ1J1xnISM8JCIxOUUleV0zXzEnISM8JCIxI1FOPWlVMjMnISM8JCIxXCJHZXR3aTQnISM8JCIybSI0IylcMyI9NichIz0kIjEobzhRJ1xNRmghIzwkIjJrVzF5MnpHOSchIz0kIjE5Iyp6Ij44JWVoISM8JCIxIik+ejB0JVI8JyEjPCQiMV9aeT45Wyo9JyEjPCQiMT52eExiLDBpISM8JCIxKEdxeGtcMEEnISM8JCIxYkl3aFAzT2khIzwkIjE6ZXZ2eWheaSEjPCQiMSVlWygqKT46bmkhIzwkIjFeOHUuaG8jRychIzwkIjA3TXhAPyMpSCchIzskIjAqb3NKVnY4aiEjOyQiMWQnPmRXKUdIaiEjPCQiMUNDcmZEI1tNJyEjPCQiMSY9MFBuYy5PJyEjPCQiMWJ6cCh5ISplUCchIzwkIjFBMnAsXFUiUichIzwkIjEqWyRvOiFmcFMnISM8JCIxZGluSEpcQWshIzwkIjFGIXBPQ0YhUWshIzwkIjElemh3TmhOWCchIzwkIjFhWGxyYTRwayEjPCQiMUF0ayZlSFlbJyEjPCQiMSM0UycqcGosXSchIzwkIjFmR2o4eXA6bCEjPCQiMUdjaUY+QkpsISM8JCIxJlI9Oy9tbmEnISM8JCIxazZoYixJaWwhIzwkIjFDUmdwVSR5ZCchIzwkIjEkcCdmJFFvTGYnISM8JCIwWSplKFwtKjNtISM7JCIwQiNlNm1WQ20hIzskIjEoKlxkRDIoKlJtISM8JCIxbHhjUltdYm0hIzwkIjFLMGNgKlE1bichIzwkIjEkSGB2MXRsbychIzwkIjFpZ2EiPTJAcSchIzwkIjAkKVFiSFR3cichIzskIjEoZkomNGE8TG4hIzwkIjFuVl9CJjQoW24hIzwkIjFOcl5QT0NrbiEjPCQiMS0qNDp2eCh6biEjPCQiMXBFXWw9SiZ6JyEjPCQiMFYmXHpmJTMibyEjOyQiMSo+KVskNCFRRW8hIzwkIjFuNFsyVSI+JW8hIzwkIjFNUFpAJFt1Jm8hIzwkIjEvbFlOQylIKG8hIzwkIjF0I2YlXGxeKSlvISM8JCIwL19NbV1TIXAhIzskIi9bV3haZT5wISM6JCIxb3ZWIiopPV4kcCEjPCQiMVEuVjBJbF1wISM8JCIxMEpVPnI9bXAhIzwkIjFzZVRMN3MiKXAhIzwkIjFVJzN1TWJzKnAhIzwkIjBULDlZKnk3cSEjOyQiMDwlUnZOS0dxISM7JCIxUHBRKm9kUS8oISM8JCIxMih6TCE9UmZxISM8JCIxdkNQPGYjXDIoISM8JCIxVV9PSitZITQoISM8JCIxNCFlYDklKmY1KCEjPCQiMHldJGYjRzo3KCEjOyQiMGFWTFBpcTgoISM7JCIxMmpMKFsnZl9yISM8JCIxdSFIOGdJIm9yISM8JCIxWT1LOlptJD0oISM8JCIxOFlKSCkpPio+KCEjPCQiMFEyTCVIdDlzISM7JCIxWyxJZHFFSXMhIzwkIjAiSEhyNiFlQyghIzskIjF5Y0cmR044RSghIzwkIjFYJXkjKlJwb0YoISM8JCIxNzdGOE5TI0goISM8JCIxJClSRUZ3JHpJKCEjPCQiMHZjN3VyTUsoISM7JCIxPCZcXyZlK1J0ISM8JCIxeEFDcCpSWE4oISM8JCIxWl1CJDN1K1AoISM8JCIxOnlBKD4zY1EoISM8JCIxI2U/N0pVNlMoISM8JCIxX0xARGtuO3UhIzwkIjA3MSNSMEBLdSEjOyQiMSgpKSk+YFl1WnUhIzwkIjFhOz5uKHlLWSghIzwkIjE7Vz0iKUciKXl1ISM8JCIxJj14XipwTSVcKCEjPCQiMV8qcCI0NikpNHYhIzwkIjBzaUpBOmFfKCEjOyQiMSpbYnJMXDRhKCEjPCQiMWUjWzZYJFtjdiEjPCQiMUQ1OWx2LHN2ISM8JCIxJnlMIno7YihlKCEjPCQiMWBsNyR6JjMudyEjPCQiMUIkPnIhKj4nPXchIzwkIjA0NzYtYVRqKCEjOyQiMWVbNU4iKW9cdyEjPCQiMUZ3NFxBQWx3ISM8JCIxJlIhNGpqdiFvKCEjPCQiMWJKM3gvSCdwKCEjPCQiMUFmMiJmQz1yKCEjPCQiMHBvXXFldHMoISM7JCIwWWghPkcqR3UoISM7JCIxRlUwTHBVZXghIzwkIjEnKnAvWjUnUngoISM8JCIxayhSNTsmXCp5KCEjPCQiMUNELnYjSF0heSEjPCQiMSNIRCEqUWowI3khIzwkIjFoIT1JXSg0T3khIzwkIjFIMyw8O2peeSEjPCQiMSlmLjV0bHIneSEjPCQiMW1qKlwlKSpwIyl5ISM8JCIxTCIqKSplUkIpKnkhIzwkIjEkKj0pSDJvUCJ6ISM8JCIxaFkocD0tJEh6ISM8JCIwVm40SU9bJXohIzskIjEpPmdcVHEuJ3ohIzwkIjFtSCYqR1ghZih6ISM8JCIxTmQlSGtROSp6ISM8JCIxLiZRcHZzcCspISM8JCIxajckNChvXUEhKSEjPCQiMC5DXCk0L1EhKSEjOyQiMSp6OyopNHZOMCkhIzwkIjFvJjRIQDQicCEpISM8JCIxTkIhcEtWWTMpISM8JCIxL14qM1d4LDUpISM8JCIxc3kpW2I2ZDYpISM8JCIxSzEpKW9jQ0oiKSEjPCQiL00oR3l6bjkpISM6JCIxcGgnbypRSmkiKSEjPCQiMVAqZTMsW3k8KSEjPCQiMTE8Jls3I1EkPikhIzwkIjF0VyUpUWkiKjMjKSEjPCQiMVRzJEdOXVdBKSEjPCQiMSwrJG9ZJSkqUiMpISM8JCIxckYjM2U9YkQpISM8JCIxUWIiW3BfNUYpISM8JCIxMSQzKTNvZSdHKSEjPCQiMXc1IUcjNDctJCkhIzwkIjFWUXpPXWw8JCkhIzwkIjBoJ3ldIio9TCQpISM7JCIxeiR6WkVCKFskKSEjPCQiMDlzKHl0RGskKSEjOyQiMTNcdyNcInp6JCkhIzwkIjF2d3YxY0smUikhIzwkIjFXL3Y/KGYzVCkhIzwkIjE5S3VNUVJFJSkhIzwkIjApZnRbeiM+VykhIzskIjFbKEdGMWl1WCkhIzwkIjEzOnN3aCpIWikhIzwkIjF4VXIhSEkmKVspISM8JCIxWXFxL1cxLyYpISM8JCIxOCkqcD0mKWY+JikhIzwkIjEjZSNwS0U4TiYpISM8JCIxXmBvWW5tXSYpISM8JCIxPSJ5MSczP20mKSEjPCQiMXkzbnVcdCJlKSEjPCQiMVtPbSkzcHNmKSEjPCQiMTFrbC1LIUdoKSEjPDdgamwkIjFqYyM0bzRebikhIz0kIjFvLypcZXU6JCkpISM9JCIxdF8wKltSISkpKikhIz0kIjF3KzckUi9YOSohIz0kIjEkeiU9KEhwNEkqISM9JCIxKWZcNz9NdVgqISM9JCIvV0owIioqUWgqISM7JCIxMSN6JDRTT3EoKiEjPSQiMCxXTSIqR28jKiohIzwkIjI3KTN2IlFIJDM1ISM9JCIyPE9kQChlKFItIiEjPSQiMVVRY2lCaVI1ISM8JCIyUUpxSCYpb18wIiEjPSQiMSV6d0xNOjQyIiEjPCQiMlhGJHlMPWMnMyIhIz0kIjJcdio9QyQzQTUiISM9JCIyYEInZjlbJnk2IiEjPSQiMmRyLV1JLE44IiEjPSQiMmo+NGF6WiJcNiEjPSQiMnhtOmVHJXprNiEjPSQiMiRbQEF3MlchPSIhIz0kIjIoRydHbUUoMyc+IiEjPSQiMikzXi5kUHQ2NyEjPSQiMiUqZVR1QyFRRjchIz0kIjAyW3l0RUlDIiEjOyQiMGJhI0dLbmU3ISM7JCIyOy1oJz0oPlZGIiEjPSQiMS12MTRpJyoqRyIhIzwkIjJFKVJaKnA3Y0kiISM9JCIyRlkhKSkqPWY3SyIhIz0kIjJKJXBHIW8wcEwiISM9JCIyUlUkcHFAYl84ISM9JCIyVCEqKjRoJyk+bzghIz0kIjJmUDE6OlhRUSIhIz0kIjJqJkciPmsiXCpSIiEjPSQiMm1MPkI4UV5UIiEjPSQiMTxlc0FZeUk5ISM8JCIyd0hLSjZKa1ciISM9JCIxeShRTmd4P1kiISM8JCIyJWVfJVI0Q3haIiEjPSQiMilIPE4lZXFMXCIhIz0kIjItQGVaMjwhNDohIz0kIjIzcGteY2pZXyIhIz0kIjI3PHJiMDUuYSIhIz0kIjI6bHhmYWNmYiIhIz0kIjFLVFFPSWdyOiEjPCQiMTcxekUmXHNlIiEjPCQiMlUzKD48ZypHZyIhIz0kIjJZYy53XVUmPTshIz0kIjFYKywpKiopPU07ISM8JCIyYl87JSlbTilcOyEjPSQiMmIrQil5PltsOyEjPSQiMSdbSCNwJUc2byIhIzwkIjJrJ2ZqZlx4J3AiISM9JCIyeVZVK1hAQ3IiISM9JCIyIz0qWy8lejFHPCEjPSQiMicpUmIzVjlQdSIhIz0kIjF6PUVANE9mPCEjPCQiMilmJG87VDJdeCIhIz0kIjAlWzItUmwheiIhIzskIjIuSyJbI1IraiE9ISM9JCIxI3ooKUcpbyU+Iz0hIzwkIjJHRiVIdExmUD0hIz0kIjJLditQJylSSyY9ISM9JCIyTEIyVE4nKSlvPSEjPSQiMlByOFglR2AlKT0hIz0kIjElPj9cTHosIT4hIzwkIjJYbkVgI2UjZSI+ISM9JCIyajlMZEpzOSQ+ISM9JCIybmlSaCEpPXIlPiEjPSQiMTJoYSdIbEYnPiEjPCQiMnNlX3B5NiV5PiEjPSQiMncxZnRGZVMqPiEjPSQiMiVbYnduWnE0PyEjPSQiMiVHPzxlN05EPyEjPSQiMjBdeSZbeCo0LyMhIz0kIjIxKVwpKlFVa2M/ISM9JCIxaDlSSDJIcz8hIzwkIjI5JXp6PnMkejMjISM9JCIyOlUvLXIkZS5AISM9JCIxLTRoKy1CPkAhIzwkIjJCUTw1cHdbOCMhIz0kIjJHJ1FVIj1CMDojISM9JCIxTi4kPW5waDsjISM8JCIxOm9CaWgiPT0jISM8JCIyYEhWRWxpdT4jISM9JCIyZXhcSTk0SkAjISM9JCIxY2lYTGN2R0EhIzwkIjJtdGlRNy1XQyMhIz0kIjJ1QHBVaFsrRSMhIz0kIjIlKW92WTUmcHZBISM9JCIyKW9AMyZmVDhIIyEjPSQiMiNcJylbJjMpKXBJIyEjPSQiMihIXiplZE1FSyMhIz0kIjIvaCxqMSJHUUIhIz0kIjEiNDNuYkZSTiMhIzwkIjFyWDZaU2RwQiEjPCQiMkYvQHZgP19RIyEjPSQiMkZfRnotbjNTIyEjPSQiMk4rTSQ9Tl47QyEjPSQiMSVbUygzKztLQyEjPCQiMlYncDkqXDF5VyMhIz0kIjJaV2AmKilIWGpDISM9JCIxRCpmKnolKjR6QyEjPCQiMm1SbS4oZnUlXCMhIz0kIjF4R3hnQ1I1RCEjPCQiMnVOejYmKlFnXyMhIz0kIjJ5JGVlVGFvVEQhIz0kIjIjPUIqPiQ+TGREISM9JCIyJyl6KVJBJXlIZCMhIz0kIjF6XyFHIlxpKWUjISM8JCIwdjZLU3JVZyMhIzskIjIwQj1PKnkiKj5FISM9JCIxNlotJVFrYmojISM8JCIxIz5KVygzQF5FISM8JCIyRG5QW09kb20jISM9JCIyRTpXXyZRXSNvIyEjPSQiMUwxbFguOilwIyEjPCQiMTByME9vejhGISM8JCIyYmVqa0tWJUhGISM9JCIxbSsobyIpKjNYRiEjPCQiMmphd3NJTzJ3IyEjPSQiMmstJG8oeiNRd0YhIz0kIjJ2XSozKUdIP3ojISM9JCIycylmXHlkbjJHISM9JCIyJG9DISpvQUtCRyEjPSQiMihSKjMkZihvKlFHISM9JCIyKT5hclxfaGFHISM9JCIyLSE+N1M8RXFHISM9JCIyMVFHMEIzZilHISM9JCIyLydbJDRzYTohSCEjPSQiMjpNVDhALHMiSCEjPSQiMjcjeXUseCVHJEghIz0kIjJPSGFAPiVcW0ghIz0kIjJQeGdEb1NUJ0ghIz0kIjFhcydIPCh5ekghIzwkIjJVdHRMbUxhKkghIz0kIjJZQCF5YCwzNkkhIz0kIjJkcCc9V21zRUkhIz0kIjJhPCRmTUpQVUkhIz0kIjFaJyoqXGk+IWVJISM8JCIydzcxYTZtTzIkISM9JCIyeGc3ZWc3JCozJCEjPSQiMiUpMz5pNGZcNSQhIz0kIjFwYmknZTAxNyQhIzwkIjFcPy54P0RPSiEjPCQiMGBRdWMpKj06JCEjOyQiMS1dJXkwWHY7JCEjPCQiMSNbXiNbOj4kPSQhIzwkIjJFJ3psUSFRKSk+JCEjPSQiMVZXMUhYWzlLISM8JCIxQjRaPjU4SUshIzwkIjEudSgpNHZ4WEshIzwkIjJPKVFHK1NVaEshIz0kIjFjLnAhXHFxRiQhIzwkIjJhJG80IilwciNIJCEjPSQiMmxKLjpaaiQzTCEjPSQiMSd6ND4nKjRTSyQhIzwkIjJ1RjtCWGMnUkwhIz0kIjFlRnNVSEliTCEjPCQiMVEjSEpWXDRQJCEjPCQiMic0ZGBCZmYnUSQhIz0kIjA+VVJUVUFTJCEjOyQiMi9uW1YhKikpeVQkISM9JCIwOmJaUk5OViQhIzskIjFKOzsmKT09XE0hIzwkIjE2Im9iUEdbWSQhIzwkIjEjZnVmJ1taIVskISM8JCIyTjEiUWM4NydcJCEjPSQiMVd2eVl5dzZOISM8JCIxQ1M+UFZURk4hIzwkIjEwMGdGMzFWTiEjPCQiMSYpcCs9dHFlTiEjPCQiMmNZOCUzUU51TiEjPSQiMVoqPikpSCsrZiQhIzwkIjJ1VEUjKnlZY2ckISM9JCIxKSpHanpLSEBPISM8JCIxeSRSK3hScGokISM8JCIxZWVXZ2llX08hIzwkIjIlUUImM3ZLI29PISM9JCIyJj4pZTdDelFvJCEjPSQiMSpIbDt0RCYqcCQhIzwkIjB5cj9Bc15yJCEjOyQiMkNEeUNyPTN0JCEjPSQiMUxaKUc/bGt1JCEjPCQiMTg3SCRwNkB3JCEjPCQiMSVwKHAkPWV4eCQhIzwkIjF1VDV1WVMkeiQhIzwkIjJYbDVYO14hNFEhIz0kIjFOciJcbChwQ1EhIzwkIjExT0tYVE1TUSEjPCQiMSczSWRqISpmJlEhIzwkIjFubDhFcmpyUSEjPCQiMVpJYTtPRygpUSEjPCQiMUcmXHA1SUghUiEjPCQiMiUzZ04oZncmPVIhIz0kIjEpW2l4M0JVJFIhIzwkIjAnKm8ieSZwKVxSISM7JCIyMVd2Jm9nXmxSISM9JCIxQT4pKmVEOyIpUiEjPCQiMjpTKVFcITRvKlIhIz0kIjEjKVt6UmJYN1MhIzwkIjFpOD9JPzVHUyEjPCQiMVV5Zz8mW1AvJSEjPCQiMk1KOTUsJlJmUyEjPSQiMlh6PzldVF0yJSEjPSQiMXVzIz0qem8hNCUhIzwkIjJhdkxBW01qNSUhIz0kIjFOLWtzNCk+NyUhIzwkIjE7bi9qdWlQVCEjPCQiMm0+YE0mUkZgVCEjPSQiMXAnZlFXPypvVCEjPCQiMVxoRU1wYyU9JSEjPCQiMidIRW5DTUArVSEjPSQiMTQiel0iKmZlQCUhIzwkIjBmJlswa11KVSEjOyQiMDIjKmUqRzpaVSEjOyQiMGIpSCdRKnppVSEjOyQiMUFdcXdlV3lVISM8JCIxLjo2bkI0JUglISM8JCIyTil6XmQpUSg0ViEjPSQiMWtXI3pNJlFEViEjPCQiMVc0TFE9LlRWISM8JCIxQ3V0RyR5bU4lISM8JCIxMFI5PltLc1YhIzwkIjEmUV0mNDgoelElISM8JCIxZG8mKip6PE9TJSEjPCQiMnVMai5IayM+VyEjPSQiMTwpcDJ5NVxWJSEjPCQiMnZIdzZGZDBYJSEjPSQiMXlGZWhQP21XISM8JCIxZiMqKT5EXT1bJSEjPCQiMVJkUlVuXChcJSEjPCQiMEAtR0JWSl4lISM7JCIxInAzS3MqeUdYISM8JCIxc15oOGlWV1ghIzwkIjFfOy0vRjNnWCEjPCQiMkQ4R1c+SGRkJSEjPSQiMThZJFtvdjhmJSEjPCQiMk00VF88QXFnJSEjPSQiMWx2a2wnb0VpJSEjPCQiMVhTMGNeSlFZISM8JCIxRDBZWTsnUmwlISM8JCIxMXEnbzgzJ3BZISM8JCIxJ1t0c2lhX28lISM8JCIxbSp6dzYsNHElISM8JCIxWmszM3dhO1ohIzwkIjIlPkhcKTQlPktaISM9JCIxKlIqKikpZVN5dSUhIzwkIjApZUl6cVtqWiEjOyQiME83KHBOOHpaISM7JCIxVCk9LDEheSV6JSEjPCQiMUBgX11sVTVbISM8JCIxLD0kNC90ZyNbISM8JCIyRUZROGA+PCVbISM9JCIxYFp1QGdPZFshIzwkIjFNNzo3RCx0WyEjPCQiMTl4Yi0hZicpKVshIzwkIjEmPmtIXDBWIVwhIzwkIjF2MVAkKT4mKj5cISM8JCIxY3J4dCUpZk5cISM8JCIxRk89a1xDXlwhIzwkIjJ3NSFmYTkqbydcISM9JCIxKGUnKlwlemAjKVwhIzwkIjIlb0lTTlc9KSpcISM9JCIxWyY0ZSM0JFEsJiEjPCQiMidHZ0A7dVpIXSEjPSQiMF5BbSFSN1hdISM7JCIxIikqR3FScTIxJiEjPCQiMFlOdSlvVHddISM7JCIxVT4leVBqPzQmISM8JCIxQCVbI28pNHg1JiEjPCQiMS5cbGVqTkJeISM8JCIxJFFoIVxHK1JeISM8JCIyTyd5WVIkXFk6JiEjPSQiMU5WKClIZUhxXiEjPCQiMmEiM0c/QiVmPSYhIz0kIjEnSChvNSkpZSxfISM8JCIxd1A0LGBCPF8hIzwkIjJtRCs6eiIpR0ImISM9JCIya3QxPkdHJltfISM9JCIxPEtKc1o8a18hIzwkIjInKXA+RkVAKXpfISM9JCIyJ29oN2B4WSZIJiEjPSQiMi9sS05DOTZKJiEjPSQiMiVIIlJSdGduSyYhIz0kIjE2Y01Dc1NVYCEjPCQiMDRfWnJgIWVgISM7JCIxcyZlXj8rUFAmISM8JCIxXl1jJnBZJCpRJiEjPCQiMUM6KGY9JCpcUyYhIzwkIjJPK3lqblIxVSYhIz0kIjElWyV5bWhHT2EhIzwkIjJYJzQ+ZEUkPlgmISM9JCIxWHVmWiJ6dlkmISM8JCIyWSNSK1FjQSRbJiEjPSQiMTEvVEdAKCkpXCYhIzwkIjImeW8iKT0nPVheJiEjPSQiMnZOQiM0XjtJYiEjPSQiMVIpSCcqZjZlYSYhIzwkIjIlPWouITRlOWMmISM9JCIyJip6VS9lL3JkJiEjPSQiMXojXDMyXkZmJiEjPCQiMHdiN2MoUjNjISM7JCIxSkFtXlMvQ2MhIzwkIjE3KG8/YSFwUmMhIzwkIjJEPnZDLlBgbCYhIz0kIjF0OylHXyQpNG4mISM8JCIyTTopRzgraidvJiEjPSQiMU1ZcC5sRi1kISM8JCIxOTY1JSpII3pyJiEjPCQiMmNlMlhbcE50JiEjPSQiMlkxOVwoZkBcZCEjPSQiMVowS2xDJ1t3JiEjPCQiMUZxc2IqMzB5JiEjPCQiMTJOOFlhOid6JiEjPCQiMSkpKlJsJD4hPSJlISM8JCIxb2slcFVbdSNlISM8JCIyJlJITjxcNFZlISM9JCIxPiVmeFNUKGVlISM8JCIyKCoqZTspKnlRdWUhIz0kIjI6UXMmKVFNKyplISM9JCIyMCcpeSp5M28wZiEjPSQiMVVgUXB0S0BmISM8JCIxQD16ZlEocCRmISM8JCIxLiQpPl0uaV9mISM8JCIyWHgvMSVvRW9mISM9JCIyT0Q2NUw4UilmISM9JCIxT3hUQClmJioqZiEjPCQiMTpVIz1KMV8sJyEjPCQiMmJwSUEhRyYzLichIz0kIjF3cmojSCpcWWchIzwkIjFlTy8keVhAMSchIzwkIjFHLFh0QXp4ZyEjPCQiMTNtJlF3UU00JyEjPCQiMDRqVUQmMzRoISM7JCIyL2RwWXVKWjcnISM9JCIyJVxnMk4jeS45JyEjPSQiMGAjW0RaLWNoISM7JCIwLCopZUByOzwnISM7JCIxI1smSDF4Sig9JyEjPCQiMWk+cSc+a0g/JyEjPCQiMkRXM3JvNSc9aSEjPSQiMk8jXF54ckRNaSEjPSQiMS85I3ptLipcaSEjPCQiMSQpeUtlLGJsaSEjPCQiMWxWdFttPiJHJyEjPCQiMVAzOVJKJW9IJyEjPCQiMTt0YUgnKls3aiEjPCQiMSd6YCo+aDhHaiEjPCQiMXktTzVFeVZqISM8JCIxZG53KyJIJWZqISM8JCIxUUs8ImZ2XVAnISM8JCIxPSh6OjNBMlInISM8JCIxIz4nKT5kb2pTJyEjPCQiMXNFUmldLEFrISM8JCIxXiIqel86bVBrISM8JCIxSmM/ViEzTFgnISM8JCIxOEBoTFgmKm9rISM8JCIxI2Y9Uy0sWVsnISM8JCIxdF1VOXZDK2whIzwkIjFYOiRbKyUqZV4nISM8JCIxRCFRX1xTOmAnISM8JCIxMVhrJilwPVpsISM8JCIxJik0MHdNJEdjJyEjPCQiMW91WG0qeiV5bCEjPCQiMVpSJ29YRVRmJyEjPCQiMUYvRlpIeDRtISM8JCIxKSpvblAlPmFpJyEjPCQiMFEkM0dmMVRtISM7JCIxZikqWz1DcmNtISM8JCIxUmoqKTMqZUJuJyEjPCQiMCNHSSpSMCEpbychIzskIjEsJDQoKik9bC5uISM8JCIweTosUSlIPm4hIzskIjFgQV9xWyVcdCchIzwkIjFLKEc0TyJmXW4hIzwkIjE4X0xeeUJtbiEjPCQiMSNwVDxNJSk9eSchIzwkIjF1IltAJDNgKHonISM8JCIxYlliQXQ8OG8hIzwkIjFONidIIlEjKUdvISM8JCIxOXdPLi5aV28hIzwkIjEpM3VQejssJ28hIzwkIjFuMD0lR2pkKG8hIzwkIjFbcWV1KDQ5Km8hIzwkIjFGTipcRWNxIXAhIzwkIjEzK1NiRnFBcCEjPCQiMSlbMWVDXCRRcCEjPCQiMXBIQE9kKlImcCEjPCQiMVUlPm1BVSdwcCEjPCQiMUBmLTwoKUcmKXAhIzwkIjEuQ1YyXyQ0KyghIzwkIjEjKSlReXAiZTtxISM8JCIxa2BDKT1HQS4oISM8JCIxVj1seVkoeS8oISM8JCIxRCRlIXA2X2pxISM8JCIxJnprJWZ3O3pxISM8JCIxdzcoKVxUIls0KCEjPCQiMWJ4RlMxWTVyISM8JCIxUFVvSXI1RXIhIzwkIjE8MjRAT3ZUciEjPCQiMSg+KFw2LFNkciEjPCQiMXlPIT5nWUk8KCEjPCQiMDo1QjQkcCk9KCEjOyQiMUhtciNlUlY/KCEjPCQiMDZCSjInKSo+cyEjOyQiMGZITmNLY0IoISM7JCIwMk9SMHo3RCghIzskIjBiVVZhRHBFKCEjOyQiMUohXFouc0RHKCEjPCQiMS5iOkQmPSMpSCghIzwkIjElKT5jOl0nUUooISM8JCIxayVvZl02Jkh0ISM8JCIxVlxQJyp6Olh0ISM8JCIxQjl5J1svM08oISM8JCIxMHo9eDRYd3QhIzwkIjElUSVmbnU0I1IoISM8JCIxYzMrZVJ1MnUhIzwkIjFRdFNbL1JCdSEjPCQiMT5RIilRcC5SdSEjPCQiMSpIPyNITW9hdSEjPCQiMHlFJz4qSC5aKCEjOyQiMEVMK1R3ZlsoISM7JCIwdVIvIUhpLHYhIzskIjBBWTNScHNeKCEjOyQiMSRwXzcpZSJIYCghIzwkIjF0ImY7UGkmW3YhIzwkIjFfYzFpKTNVYyghIzwkIjFMQFpfYCYpenYhIzwkIjE4J3lHJT1dJmYoISM8JCIxJjQmR0wkWzZoKCEjPCQiMXU6cEJbekV3ISM8JCIxWCEpNDk4V1V3ISM8JCIxRVhdL3kzZXchIzwkIjEyNSJcSE1QbighIzwkIjEnWzxgeSFRKm8oISM8JCIxb1JzdnMtMHghIzwkIjFbLzhtUG4/eCEjPCQiMUhwYGMtS094ISM8JCIxKlJWcHVtPnYoISM8JCIwKSlcdEI4d3coISM7JCIwT2N4c2ZLeSghIzskIjAlRzs9aSEqKXooISM7JCIwS3AmM0ZiOXkhIzskIjEuZSgqKT4qPkl5ISM8JCIxI0cjUSpvWGUleSEjPCQiMWEoKXl6QFxoeSEjPCQiMU1fPnEnUXIoeSEjPCQiMTo8Z2deeSMqeSEjPCQiMSY+MzVsSiUzeiEjPCQiMXZZVFQieVMjeiEjPCQiMWM2Iz1qQyhSeiEjPCQiMU93QUE2UGJ6ISM8JCIxM1RqN3cscnohIzwkIjEoZVNJNWttKXohIzwkIjFwcVckZjVCKykhIzwkIjBiYFEzZHosKSEjOyQiMC5nVWQuTy4pISM7JCIxNGxtaytEXCEpISM8JCIxIipIMmJsKlsxKSEjPCQiMWklemEvVjAzKSEjPCQiMVVmKWVgKj0nNCkhIzwkIjFBQ0hFZyQ9NikhIzwkIjEvKilwO0RbRiIpISM8JCIxJFEwcitISjkpISM8JCIxaz1eKFx2KGUiKSEjPCQiMVckPXopPlV1IikhIzwkIjE7W0t5JW8rPikhIzwkIjEmSEoob1xyMCMpISM8JCIxeHg4ZjlPQCMpISM8JCIxY1VhXHorUCMpISM8JCIxUTImKlJXbF8jKSEjPCQiMTxzTkk0SW8jKSEjPCQiMShwajJVWlJHKSEjPCQiMDxxNiJSZipIKSEjOyQiMGx3OlNTX0opISM7JCIwOCQpPipvKTNMKSEjOyQiMGgqUSNRTGxNKSEjOyQiMSI0J3pzKXpATykhIzwkIjFzRD9qaiN5UCkhIzwkIjAwNE8mR1okUikhIzskIjFLYixXJD4iNCUpISM8JCIxMT9VTWV3QyUpISM8JCIxJltHW0s3L1cpISM8JCIxbFxCOillZ1gpISM8JCIxWTlrMGBxciUpISM8JCIxRXovJ3pedFspISM8JCIxMldYJ0cpKkhdKSEjPCQiMSgpMydveFcnPSYpISM8JCIxZXRFbjdITSYpISM8JCIwJVFuZHgkKlwmKSEjOyQiMEshM1tVZWwmKSEjOyQiL29bUTJCImUpISM6JCIxIkckKilHcyhvZikhIzwkIjFoKCpIPlBfNycpISM8JCIwQzEoNC08RycpISM7JCIxN0Y2K24iUWspISM8JCIxJD4+MD5qJWYnKSEjPCQiMWxjIzRvNF5uKSEjPDdgamwkIjA5KEhNWUZKKCkhIzwkIjFMSF5MRHYpKSkpISM9JCIxRihHRlZJaS8qISM9JCIxPVglPkwzUD8qISM9JCIxRC07Smk9aCQqISM9JCIxPGdQSVRtPSYqISM9JCIxMj1mSD85dycqISM9JCIxLXchKUcqPk8kKSohIz0kIjElUkIhR3k0IioqKiEjPSQiMiY9UnNzdiZbLCIhIz0kIjJ6XFhFTzAxLiIhIz0kIjF4cWNfSk5ZNSEjPCQiMnhrKVtVNDVpNSEjPSQiMnBBNUN0W3kyIiEjPSQiMTE9TEFsZiQ0IiEjPCQiMmFRYEFKVyQ0NiEjPSQiMlknXDwtQDRENiEjPSQiMVdsNCMqKVIzOSIhIzwkIjJKNz0/byhlYzYhIz0kIjJPcFI+Wk5CPCIhIz0kIjF0Nyc9RSQzKT0iISM8JCIyQiZHeV41JFE/IiEjPSQiMjhWLzwlKXkmPjchIz0kIjIwLEU7akVgQiIhIz0kIjIpKmVaOlV1NUQiISM9JCIyI3AicDlAQW9FIiEjPSQiMiZSMlIsK2QjRyIhIz0kIjE+QkoiejwkKUgiISM8JCIxKSpRQiJlbFNKIiEjPCQiMnZaYjZQOClIOCEjPSQiMmwweDU7aGJNIiEjPSQiMU8nKSo0JiozOE8iISM8JCIyYUA/NHVjcVAiISM9JCIyYnlUM2AvR1IiISM9JCIxbEx3P0JiMzkhIzwkIjJXJVxvNSxJQzkhIz0kIjJLXzExIXovUzkhIz0kIjEuIkcwcCZ6YjkhIzwkIjJAb1wvW1Y6WiIhIz0kIjI4RXIuRiJIKFsiISM9JCIyOyRHSGchUkldIiEjPSQiMjNUOS0mb3k9OiEjPSQiMjAqZjhTWWBNOiEjPSQiMidwdjBJQ0ddOiEjPSQiMidbInoqPi0ubTohIz0kIjFHMiEqNCF5PGUiISM8JCIydElBKSp6RHZmIiEjPSQiMXlRdSpldEtoIiEjPCQiMWRhbXo4LUg7ISM8JCIxT3FlcCJwWmsiISM8JCIyZGgzJmZwXmc7ISM9JCIyWD5JJVxaRXc7ISM9JCIxdTxOUkQsI3AiISM8JCIyS050I0gudzI8ISM9JCIyUCNcPj4iM05zIiEjPSQiMktdOyI0ZkRSPCEjPSQiMSMzUSEqcC5ddiIhIzwkIjI7bWYqKVteMngiISM9JCIyMkMiKSl5IypcJ3kiISM9JCIyLiNHISlvcUMtPSEjPSQiMiUqUkMoZVsqeiI9ISM9JCIwKGZrW0V1TD0hIzskIjFcdmNRL1xcPSEjPCQiMidHIipbRyNRXyc9ISM9JCIydXE1JT1nKTQpPSEjPSQiMShHSyQzUXQnKj0hIzwkIjFtUUQpZiJbNz4hIzwkIjJgV3YiKVFII0c+ISM9JCIxO3E0eXIoUiU+ISM8JCIxJmY9IW9cc2Y+ISM8JCIyWDxTenZzYSg+ISM9JCIyUHZoeWE/Nyo+ISM9JCIxTEx5UCRvcCsjISM8JCIyQyJccUZockE/ISM9JCIyOlxFdyJSWVE/ISM9JCIxaSFbdnE2VTAjISM8JCIyN2twdVxmKnA/ISM9JCIwQSJSKEcyZDMjISM7JCIvR0p4XVgsQCEjOiQiMXpWQm5HPzxAISM8JCIyI2VmOmQxJkg4IyEjPSQiMnVgeHFXKXBbQCEjPSQiMm02KipwQllXOyMhIz0kIjJ1bz9wLSU+IT0jISM9JCIybUVVbyI9JWY+IyEjPSQiMmUlUXcxJypvNkEhIz0kIjFEYW8nUlB1QSMhIzwkIjEvcWcnPSY9VkEhIzwkIjJMZUdsKEgkKmVBISM9JCIyRztda3chb3VBISM9JCIyTHRyamJHL0gjISM9JCIyREokSFlqPDFCISM9JCIyOCpbQE9UIz5LIyEjPSQiMXJrOEU+blBCISM8JCIyLzBlZ3I+TU4jISM9JCIyJkgnemZdbiJwQiEjPSQiMigzNyFmSDpcUSMhIz0kIjF6RiNlM2oxUyMhIzwkIjIlZVZ1djNUO0MhIz0kIjFRZm1sJ2VAViMhIzwkIjE8dmViayF6VyMhIzwkIjJpNDRiQ2FPWSMhIz0kIjJhbklhLi0lekMhIz0kIjFiQU5EKVxeXCMhIzwkIjJhI1FGOncqM14jISM9JCIyVVMmPjBha0VEISM9JCIyTSlwNiY+JFJVRCEjPSQiMkxjUV0pNDllRCEjPSQiMkQ5Z1x4KSlRZCMhIz0kIjI7cyIpW2NPJyplIyEjPSQiMSxMIVtOJVEwRSEjPCQiMjgoW3NXQDhARSEjPSQiMjBYWVkkKnpvaiMhIz0kIjIuLm9Yc0ZFbCMhIz0kIjE0JypbOWJQb0UhIzwkIjIkKT02V0lCVG8jISM9JCIydndLVjRyKSpwIyEjPSQiMnVNYVUpKT1jciMhIz0kIjJ2ImY8dW1PSkYhIz0kIjEnXCg0a1c2WkYhIzwkIjJpMj5TRGlHdyMhIz0kIjJabFNSLzUneUYhIz0kIjJZQmlRJHlOJXojISM9JCIyUCJReUJjNTVHISM9JCIxJFIwUFRgZSNHISM8JCIyQyhwaS43Z1RHISM9JCIyRWFbTioqW3QmRyEjPSQiMkM3cU15JzR0RyEjPSQiMSw8UnRYJSkpKUchIzwkIjIvRzhMTyNmL0ghIz0kIjInZltCYCxNP0ghIz0kIjIpUWs6VnozT0ghIz0kIjE9IXlJdE49JkghIzwkIjEqZSoqSF8kZW5IISM8JCIydztASEpKTClIISM9JCIyb3VVRzV6ISoqSCEjPSQiMm5La0YqbyNbLCQhIz0kIjExZm8jb3UwLiQhIzwkIjJhWzJFWkFqLyQhIz0kIjFrIUhERXE/MSQhIzwkIjJaal1DMD15MiQhIz0kIjE5QVBVZWMkNCQhIzwkIjEkeiRIS09KNEohIzwkIjF0YEBBOTFESiEjPCQiMV9wODcjNDM5JCEjPCQiMUomZT8rZGw6JCEjPCQiMDYhKT56L0I8JCEjOyQiMjFvLD5lXyEpPSQhIz0kIjBFQj1QK1E/JCEjOyQiMVJbdWgiWyY+SyEjPCQiMiU9a21eZkhOSyEjPSQiMSgqemVUUC9eSyEjPCQiMXgmNDpgInptSyEjPCQiMWQ2VkAkUkRHJCEjPCQiMUZGTjZyRylIJCEjPCQiMmNJdTchXC45TCEjPSQiMScpZT4icCN5SEwhIzwkIjFrdTYiW0liTSQhIzwkIjFXIVI1Rnk3TyQhIzwkIjFCMSc0MUVxUCQhIzwkIjEtQSkzJlF4I1IkISM8JCIxc1AhM2tAJjNNISM8JCIxX2BzSSVwVVUkISM8JCIyOSRwaz9zLFNNISM9JCIwXm8wLGxkWCQhIzskIjA0IVwrR15yTSEjOyQiMXA7VCFmZ3NbJCEjPCQiMVtLTCFRM0ldJCEjPCQiMiY9W0RxaHY9TiEjPSQiMSpSdywnUl1NTiEjPCQiMXh6NF08RF1OISM8JCIxZCY+K2EqKmZjJCEjPCQiMU42JSpIdHUiZSQhIzwkIjJhcmkpPl5cKGYkISM9JCIxJkgleTRIQzhPISM8JCIxbGVxKnAhKipHTyEjPCQiMVd1aSpbUVprJCEjPCQiMUIhXCZ6aVtnTyEjPCQiMkVncSVwU0J3TyEjPSQiMSM9I1JmPSk+cCQhIzwkIjFoUEpcJ0h4cSQhIzwkIjIwTU4jUnVaQlAhIz0kIjE+cDpIX0FSUCEjPCQiMjBceSE+SShcdiQhIz0kIjAyKyE0M3NxUCEjOyQiMVs7IyopZm9reSQhIzwkIjIlR0slKSlRO0EhUSEjPSQiMmwhW3d5VCd6IlEhIz0kIjEoUSdvbz5yTFEhIzwkIjFtemdlKGYlXFEhIzwkIjFPJkgmW3Y/bFEhIzwkIjJjNl4lUWAmNClRISM9JCIxJnBzJEdKcScqUSEjPCQiMXVVSD00WDdSISM8JCIyTSZlQDMoKT5HUiEjPSQiMUt1OClcWVIlUiEjPCQiMTchZiEpRyVwZlIhIzwkIjI7ZSEpejJVYShSISM9JCIxaEAheicpKj0iKlIhIzwkIjFUUCN5bFBwKyUhIzwkIjIlPmB1WmFvQVMhIz0kIi9wbVBLVlFTISM6JCIyJnklKWVGNT1hUyEjPSQiMWQrXjwpRypwUyEjPCQiMiZHO1YybW4mMyUhIz0kIjEyS04oUkM5NSUhIzwkIjEoeXVzPXNyNiUhIzwkIjJrTyc+eCo+SDglISM9JCIxWHo2bnhtW1QhIzwkIjFEJlJxYjpXOyUhIzwkIjEvNidwTWosPSUhIzwkIjF2RSlvODZmPiUhIzwkIjJORC9vIyplO0AlISM9JCIyQyRlcztuU0ZVISM9JCIxN3VrMVg6VlUhIzwkIjI5KipvbEgtKmVVISM9JCIxcjBcJzNdWUYlISM8JCIwOjdrKHlSIUglISM7JCIwc0xqbVhoSSUhIzskIi9gRGNNKj1LJSEjOiQiMXpvPFk3a1BWISM8JCIxZSUpNE8hKlFgViEjPCQiMncuP2cjbzhwViEjPSQiMTs7JWZoJSlbUSUhIzwkIjEnPmplU0sxUyUhIzwkIjF2WnkmPiFRO1chIzwkIjFYanEmKXo3S1chIzwkIjFEeml2ZCh5VyUhIzwkIjJQXVxiY0JPWSUhIz0kIjEkM3JhTnIkelchIzwkIjFqRVJYIj5eXCUhIzwkIjI6QzlgJHAnM14lISM9JCIxQGVCRFpoRVghIzwkIjEiUmReXmlCYSUhIzwkIjFyKnldSTUiZVghIzwkIjIxYitdNGVRZCUhIz0kIjIlSEAjXCllZyplJSEjPSQiMTRQJVtuYGBnJSEjPCQiMSlHbFpZLDZpJSEjPCQiMW9vb2EjXG9qJSEjPCQiMVElM1kvKGZfWSEjPCQiMm0sSVgkW01vWSEjPSQiMSdmXldpIzQlbyUhIzwkIjJjPHRWVFMpKnAlISM9JCIyV3YlSC8jKWU6WiEjPSQiMU5qQCUqZkxKWiEjPCQiMTh6OCV5JDNaWiEjPCQiMSRbZlNkSkd3JSEjPCQiMk4xIilST3omeVohIz0kIjFVRSFSOkZWeiUhIzwkIjIwQUNRJVwyNVshIz0kIjEsZXVMRiNlI1shIzwkIjEiUW5PX3E6JVshIzwkIjFmKillOCQ9dCZbISM8JCIyJkgwXi5oMXRbISM9JCIwNktNKlEiKSkpWyEjOyQiMSlvYExvaFghXCEjPCQiMW5fRnQlNC4jXCEjPCQiMVpvPmpzME9cISM8JCIxRSU9SjAwPSZcISM8JCIxMCsvVkdiblwhIzwkIjF3OidIaitMKVwhIzwkIjFjSilHVVshKipcISM8JCIxTVohR0AnejldISM8JCIyT0pFRitXMC4mISM9JCIxJCp5ayN6IkhZXSEjPCQiMXIlcERlUj8xJiEjPCQiMjowIlxzdHl4XSEjPSQiMUFFVGleYCQ0JiEjPCQiMSxVTF9IRzReISM8JCIweWJBdUldNyYhIzskIjFmdDxLJnkyOSYhIzwkIjFSKik0QWpfY14hIzwkIjE9MC03VEZzXiEjPCQiMSk0VT4hPi0pPSYhIzwkIjJ2bWo9cHBQPyYhIz0kIjFaX3kiWzwmPl8hIzwkIjJsI29xcl9FTl8hIz0kIjJhU0c7MTg1RCYhIz0kIjEmKSpcOiYzd21fISM8JCIxazpaVCczREcmISM8JCIxVkpSSmtEKUgmISM8JCIxQVpKQFUrOWAhIzwkIjJFSE83LF8oSGAhIz0kIjFzeTosKSpcWGAhIzwkIjFeJXo1Zlo3TyYhIzwkIjIvLiw1USYqcFAmISM9JCIyMWhBNDxWRlImISM9JCIwPlczJzRcM2EhIzskIjFvZHddKFFVVSYhIzwkIjImUnRvU2wpKlJhISM9JCIxPiozMUxNZFgmISM8JCIxKVxJMDcjW3JhISM8JCIxeD9YNSpIc1smISM8JCIyYmx0LnF4SF0mISM9JCIxTV9IIVxEKD1iISM8JCIxOW9AIUd0V2AmISM8JCIxJ1FRLDJALWImISM8JCIyWCcqZisnKW9mYyYhIz0kIjFXOikqXG1yImUmISM8JCIxQkohKlJXWShmJiEjPCQiMkNxQylIQUA4YyEjPSQiMSJHWSg+KycqR2MhIzwkIjFoeW00eXFXYyEjPCQiMUolKmUqZmIvbSYhIzwkIjE2NV4qUS5pbiYhIzwkIjInKmVLJXo2Jj5wJiEjPSQiMiVvVE5wKilwMmQhIz0kIjFbZEZmbldCZCEjPCQiMnVLKD5cWD5SZCEjPSQiMnghKj0iUkIlXHYmISM9JCIxeC8vSCxwcWQhIzwkIjFjPycqPXpWJ3kmISM8JCIybGokKSkzZD0tZSEjPSQiMllAMCkpXEx6ImUhIz0kIjJOekUoKUcib0xlISM9JCIyV1BbJ3khSCVcZSEjPSQiMkQmKnAmb288bGUhIz0kIjFDOlxlWSM0KWUhIzwkIjEtSlRbQ24nKmUhIzwkIjEjb00kUS1VN2YhIzwkIjBFYyNHIW8iR2YhIzskIjIvJXk8PWUiUiVmISM9JCIyMVUqNDNPbWZmISM9JCIyJSoqNC0pUjZhKGYhIz0kIjF5RCV6PWY2KmYhIzwkIjFcVCd5KHAhcCsnISM8JCIyd3MmeW5abEFnISM9JCIxMnRxZERTUWchIzwkIjEmKSlHd01dVDAnISM8JCIyYVlddjgpKilwZyEjPSQiMVg/WkZmayYzJyEjPCQiMlhpJFI8UFIsaCEjPSQiMSU+OnRdVHI2JyEjPCQiMXRuQihIKilHOCchIzwkIjFgJGVyM1AnW2ghIzwkIjJOJCp6cShbUWtoISM9JCIyO14scW1LLD0nISM9JCIyMDRCcFghKWU+JyEjPSQiMG5Xb0NHO0AnISM7JCIyMENtbi53dEEnISM9JCIxPnlvRVE3VmkhIzwkIjEoUjRtaHIpZWkhIzwkIjF6NGAxJT5ZRichIzwkIjFlRFgnPm4uSCchIzwkIjFQVFAnKVw2MWohIzwkIjE8ZEh3Ric9SychIzwkIjEnRzxpYzV3TCchIzwkIjFtKVFoTmVMTichIzwkIjFYLzFZaDVwaiEjPCQiMUQ/KWYkUiZbUSchIzwkIjEvTyFmcywxUychIzwkIjEkPURlXlxqVCchIzwkIjFpbnUwdDRLayEjPCQiMUskb2M0WHlXJyEjPCQiMTYqKmUmKUdmamshIzwkIjEiXDZiblMkemshIzwkIjAyTGFZKTMmXCchIzskIjFcWU5iaSQzXichIzwkIjFIaUZYU2VFbCEjPCQiMTN5Pk49TFVsISM8JCIxeSQ+Xml6IWVsISM8JCIxZjQvOnUjUWQnISM8JCIxUUQnXD92JiplJyEjPCQiMTtUKVsqSEswbSEjPCQiMShwMFt5cTVpJyEjPCQiMXVzc3UmPW9qJyEjPCQiMWApW1lPbURsJyEjPCQiMUIvZGFUSm9tISM8JCIxMD9cVz4xJW8nISM8JCIxJWU4V3Q0KSpwJyEjPCQiMWpeTEN2YjpuISM8JCIxVG5EOWBJSm4hIzwkIjFBJHlUNWBxdSchIzwkIi8qKjQlKjMhR3cnISM6JCIxcjktJW9bJnluISM8JCIwMFZSWidIJXonISM7JCIwamtRRVcrIm8hIzskIjE0aXlgP3pEbyEjPCQiMSl5MlAlKVI6JW8hIzwkIjFtJEhPaihHZG8hIzwkIjFaNGJCYS50byEjPCQiMUREWjhLeSkpbyEjPCQiMSc0JVIuNWAvcCEjPCQiMXZjSiR6eS0jcCEjPCQiMWJzQiRlRWckcCEjPCQiMU0pZUpQdTwmcCEjPCQiMTgvM2pAX25wISM8JCIxJCo+K2AqcEspcCEjPCQiMXNOI0h1PCEqKnAhIzwkIjFVXiVHYGxaLCghIzwkIjFAbndBTF5JcSEjPCQiMSwkKW83NkVZcSEjPCQiMXopNEUhKjM/MSghIzwkIjFmOWAjcGN4MighIzwkIjFSSVgjWy9ONCghIzwkIjE9WVBzQUQ0ciEjPCQiMSk9J0hpKytEciEjPCQiMW54QF95dVNyISM8JCIxWSRSQGsmXGNyISM8JCIxRTQxS01Dc3IhIzwkIjEwRCk+QSIqej0oISM8JCIxJTMvPixSUD8oISM8JCIxa2MjPSFvWz5zISM8JCIxTnN1ImZNX0IoISM8JCIxOClvO1EjKTREKCEjPCQiMSJSIWZyLHRtcyEjPCQiMXQ+Xmh6WiNHKCEjPCQiMWBOVl5kQSlIKCEjPCQiMDhiOGF0UkooISM7JCIxNG5GSjhzSHQhIzwkIjEiRyk+QCJwYU0oISM8JCIwJyk+NiJwQGh0ISM7JCIxUjkvLFoncFAoISM8JCIxPEknNFw3RlIoISM8JCIxKWYlKTNHZyUzdSEjPCQiMXdoITMyM1VVKCEjPCQiMWJ4c2dlJipSdSEjPCQiMUUkXDFsLmRYKCEjPCQiMTA0ZFM5WHJ1ISM8JCIxJFsjXEkjKj4oWyghIzwkIjFsU1Q/cSVIXSghIzwkIjFXY0w1W3A9diEjPCQiMUJzRCtFV012ISM8JCIxLCl5LFIhPl12ISM8JCIwUSssPVFmYyghIzskIjFfPi1xZm8iZSghIzwkIjFKTiUqZlBWKGYoISM8JCIwNmwpXDo9OHchIzskIjEqbyd5UiRIKkd3ISM8JCIxcCMzKEhybld3ISM8JCIxWylIJz5cVWd3ISM8JCIxRTliNEY8d3chIzwkIjEoKkhaKlw/PnAoISM8JCIxelhSKkdvd3EoISM8JCIxY2hKemdUQnghIzwkIjFOeEJwUTtSeCEjPCQiMTokZiJmOyJcdighIzwkIjElKjMzXCVmMXgoISM8JCIxdEMrUnNTJ3koISM8JCIxVlMjKkddOi15ISM8JCIxQWMlKT1HIXoieSEjPCQiMS1zdzMxbEx5ISM8JCIxInkpbylSKVJceSEjPCQiME81Jyk9WV4neSEjOyQiMCU+YHlSKjMpeSEjOyQiMT5OWG88aycqeSEjPCQiMSI0diRlJipRN3ohIzwkIjBuJ0hbdDhHeiEjOyQiMVsjPSNRXilRJXohIzwkIjFGKVIiR0hqZnohIzwkIjExOTE9MlF2eiEjPCQiMSYpSCl6XUc2KnohIzwkIjFsWCF6SHdvKykhIzwkIjFPaCN5M0NFLSkhIzwkIjE6eHV4PVBRISkhIzwkIjEkSHB3bT5UMCkhIzwkIjF1M2ZkdScpcCEpISM8JCIxX0NeWl9oJjMpISM8JCIxSlNWUElPLCIpISM8JCIxNmNORjM2PCIpISM8JCIxJD14c2hlRzgpISM8JCIxaCgpPjJrZ1siKSEjPCQiME0/cj5hVjspISM7JCIwIz4vKCk+NSE9KSEjOyQiMSpcanB4XGU+KSEjPCQiMXddKW9jKGY2IykhIzwkIjFlbSFvTlh0QSkhIzwkIjFHI0duOSQ0ViMpISM8JCIxMilcbSQ0JSllIykhIzwkIjEnUXJscylldSMpISM8JCIxbEhcO2xMIUgpISM8JCIxWFhUMVYzMSQpISM8JCIxQ2hMJzRLPUspISM8JCIxLXhEJykpenZMKSEjPCQiMXQjemhuRkxOKSEjPCQiMWAzNW1hMnAkKSEjPCQiMUtDLWNLI1tRKSEjPCQiMTZTJWYvcjBTKSEjPCQiMSJmbGUkKT1qVCkhIzwkIjFycnlEbTFLJSkhIzwkIjB2M2RUOXlXKSEjOyQiMUcuajBBY2olKSEjPCQiLz5iJioqNCR6JSkhIzokIjF5TVomeWRdXCkhIzwkIjFkXVJ2YiEzXikhIzwkIjFPbUpsTGJFJikhIzwkIjE7I1FfOixCYSkhIzwkIjEmemZeJSpbIWUmKSEjPCQiMXU4M05uenQmKSEjPCQiMVdIK0RYYSplKSEjPCQiMUNYI1xKI0gwJykhIzwkIjEtaCVbNVM1aSkhIzwkIjEkb25aKnl5TycpISM8JCIxayMqbyVvTkRsKSEjPCQiMVQzaHVNR28nKSEjPCQiMFVLWEVKU28pISM7JCIwKlJYYSF6KCpwKSEjOyQiMGR2ViVvXzooKSEjOyQiMVRySE1ZRkooKSEjPDdgamwkIjE7YCl6aFBAeSkhIz0kIjEmUVdjKUdgUyopISM9JCIxX01JYCJHKik0KiEjPSQiMTtEJzRVQnREKiEjPSQiMShcQCcpbz1kVCohIz0kIjFpMEdjUjZ1JiohIz0kIjFFJ1JSQTREdCohIz0kIjEncClmIlwvNCopKiEjPSQiMml4RGYoKkhcKyIhIz0kIjJFbyJwLSZwMi0iISM9JCIyJCplZCVIITRtLiIhIz0kIjEnXEJpYltDMCIhIzwkIjJQUiopSDMpR281ISM9JCIyL0liKDR3NyUzIiEjPSQiMnI/QGw4bioqNCIhIz0kIjJQNihHam0hZTYiISM9JCIyLS1gKz5ZOzgiISM9JCIxRio9b3ImW1o2ISM8JCIyUCRbZVZfS2o2ISM9JCIyOXRdLnhrIno2ISM9JCIyIlFtNihIL10+IiEjPSQiMllhIylRI1ElM0AiISM9JCIyOVhbMU4kb0U3ISM9JCIxZVZUeEdfVTchIzwkIjJZRSE9L0NPZTchIz0kIjI4PFk0JD4/dTchIz0kIjFwP3JkOS8hSCIhIzwkIjJlKHpaJSk0KWVJIiEjPSQiMkYpUUM2MHNAOCEjPSQiMSp5NCFRK2NQOCEjPCQiMmNwdlpjKlJgOCEjPSQiMkJnVDo0UiNwOCEjPSQiMTR2ST0neV1RIiEjPCQiMm5TdF05PTRTIiEjPSQiMkxKUj1uZG5UIiEjPSQiMEEwJyk+KGZLOSEjOyQiMm43cmBzTyVbOSEjPSQiMksuUEBEd1VZIiEjPSQiMiwlSCEqeWQ2IVsiISM9JCIybiUpb2NJYmZcIiEjPSQiMlV1TUMkW3o2OiEjPSQiMV4xP2ZWakY6ISM8JCIyeWJtZilRWlY6ISM9JCIyVVlLRlQ4JGY6ISM9JCIxciQpXFJIOnY6ISM8JCIyd0ZraVkjKjRmIiEjPSQiMSU9SUkqPiRvZyIhIzwkIjEjMyd6PjpuQTshIzwkIjIpKSk+Y1k1XlE7ISM9JCIyYip5S3QwTmE7ISM9JCIxLVE0Kyw+cTshIzwkIjInMyhmb2lIZ28iISM9JCIyYGhETzpwPXEiISM9JCIyPF8iUiFvM3hyIiEjPSQiMig+dToyI1tOdCIhIz0kIjFFTCNSdChRXDwhIzwkIjJHQipvZ3NBbDwhIz0kIjIjUl5YKHltNXkiISM9JCIyai9AVUoxcHoiISM9JCIxYHApNCVldTc9ISM8JCIyJGZHdm5gZUc9ISM9JCIydXY9WCpbVVc9ISM9JCIxa1lHQFdFZz0hIzwkIjFyMDBbUjV3PSEjPCQiMndaO1taVj4qPSEjPSQiMSVRI2UsSXkyPiEjPCQiMi5IWyRHRGlCPiEjPSQiMm4+OV4waSVSPiEjPSQiMSY0ISk9ZSxgJj4hIzwkIjI5K1knMzY5cj4hIz0kIjImMz5UTjEpcCk+ISM9JCIxOnk8aSwjRysjISM8JCIyN3NWKilvZic9PyEjPSQiMiRHJzRkQCpcTT8hIz0kIjFOYlpVKFEuMCMhIzwkIjJGVlQjcCN5aDEjISM9JCIxUnQrJ3o8PzMjISM8JCIyZUN0RktkeTQjISM9JCIyRDpSJlxvcDhAISM9JCIxZl1Jd2pgSEAhIzwkIjJjJzQyLmZQWEAhIz0kIjJGKG8kKUhhQGhAISM9JCIxekZnY1wweEAhIzwkIjF4J29MWyUqRz4jISM8JCIyTmVNLCxNKDNBISM9JCIyLVwrcGB0WEEjISM9JCIybVJtTzE4L0MjISM9JCIxLkJWIWZfaUQjISM8JCIyKDQjKT48QDRzQSEjPSQiMm42a1JrSnpHIyEjPSQiMlcsSTI8clBJIyEjPSQiMUBmXChwNSc+QiEjPCQiMnYjPUVDLVhOQiEjPSQiMlZ0RjV2KkdeQiEjPSQiMjhrJHp4I0hyTyMhIz0kIjJ4YWZYISlvSFEjISM9JCIyV1hEOEwzKSlSIyEjPSQiMj1OIjRleWs5QyEjPSQiMiZlcyZbUShbSUMhIz0kIjJfO0I7InBLWUMhIz0kIjFzISpRUWs7aUMhIzwkIjIneVw6bGYreUMhIz0kIjJhKTMjPlxYUVwjISM9JCIxI3onbz1dbzREISM8JCIyKSpvX2FhQ2JfIyEjPSQiMmxmPUEyazhhIyEjPSQiMS5YKSopZi5zYiMhIzwkIjBUXWQ3VklkIyEjOyQiMm5KO0RsIykpKWUjISM9JCIxQkFHekBzL0UhIzwkIjA4W2dxaDBpIyEjOyQiMnYtOUdCLGtqIyEjPSQiMlgkKnomZjJDX0UhIz0kIjItJWVNJ0chM29FISM9JCIyd3U2SiIpPlJvIyEjPSQiMWF3KClSJGYoKnAjISM8JCIyL2NWbScpKWY6RiEjPSQiMm5ZNE1SUTl0IyEjPSQiMmJPdiwjekZaRiEjPSQiMXM3JXBXPEp3IyEjPCQiMid5cnF0cCYqeUYhIz0kIjEmM3QvXSd6JXojISM8JCIyOCoqUXMtTzEiRyEjPSQiMSoqWythYlpFRyEjPCQiMlohM3ghMzpCJUchIz0kIjI9ck92Z2EiZUchIz0kIjE0RUlNVCpSKEchIzwkIjJtXm81bUwpKilHISM9JCIyQlVNeT10YyFIISM9JCIyJEguZzlGXkBIISM9JCIyZEJtOENfdCRIISM9JCIyRzlLIm88PmBIISM9JCIxXCEpKltISiFwSCEjPCQiMVpSbUAzKFspSCEjPCQiMWEpSCVbLnIrSSEjPCQiMi53Jj52KVxsLCQhIz0kIjJtbWg+UypRS0khIz0kIjJQZEYoRypHI1tJISM9JCIyL1skXGIlb1MxJCEjPSQiMmxRZkEpeiEqekkhIz0kIjElR0QhNHZ1JjQkISM8JCIyNz4iek5xZTZKISM9JCIxKTRkRGNFdTckISM8JCIxMElLKjNtSzkkISM8JCIyOSIqKTM7YzVmSiEjPSQiMT1bJkc5WFw8JCEjPCQiMUMyaXBZeSE+JCEjPCQiMkRpJ1EnPkNtPyQhIz0kIjFIRDpCUFlBSyEjPCQiMU4lPSpcS0lRSyEjPCQiMVVWb3dGOWFLISM8JCIxXC1YLkIpKnBLISM8JCIxY2hAST0jZUckISM8JCIxaT8pcE5oO0kkISM8JCIyMCd6dSQpM108TCEjPSQiMm0nUV41L01MTCEjPSQiMXQoenMkKnoiXEwhIzwkIjF6Yy9rJT5dTyQhIzwkIjEoZTYzKiplM1EkISM8JCIyTVx4dl4pcCdSJCEjPSQiMiYqUlZWL1FEVCQhIz0kIjEoSDQ2ZHgkR00hIzwkIjJZP3Z5NDxVVyQhIz0kIjIxNlRZaWMrWSQhIz0kIjE8cVNeaCplWiQhIzwkIjFESDx5Y3QiXCQhIzwkIjFKKVFcP3Z2XSQhIzwkIjJ2dC88dDlNXyQhIz0kIjFOMVplVURSTiEjPCQiMkVhT195JDRiTiEjPSQiMVtDKzdMJDRkJCEjPCQiMWIkbyhRR3gnZSQhIzwkIjI5RU1iTzdFZyQhIz0kIjFvLEkjKj1YPU8hIzwkIjJiMm0hPjlITU8hIz0kIjF0PiRlJTQ4XU8hIzwkIjApeWZzLyhmbSQhIzskIjEneWokKioqND1vJCEjPCQiMSRwSGhfXHdwJCEjPCQiMiUqZiYqRzAqWzhQISM9JCIxMTpteiZHJEhQISM8JCIxN3VVMSJvXnUkISM8JCIyJj5MPkx3K2hQISM9JCIxPCNmKmZyJW94JCEjPCQiMUNecydvJ28jeiQhIzwkIjAuIlw4aV8zUSEjOyQiMnUkcERTZE9DUSEjPSQiMk0lRy1uXz9TUSEjPSQiMV4oKXkkeldnJlEhIzwkIjJ3bGEwSyUpPShRISM9JCIyWWI/dCVRcygpUSEjPSQiMWhrM3VMYy5SISM8JCIxb0ImMyFIUz5SISM8JCIxdiM9d1VVXyRSISM8JCIxIj0lUWE+M15SISM8JCIxKTNdNltAcCdSISM8JCIxJipmInoraEYpUiEjPCQiMkUqPW9NMGcpKlIhIz0kIjEqelo5MVNXLCUhIzwkIjExUEApZXotLiUhIzwkIjE4J3pcNj5oLyUhIzwkIjE+YnVUJ2U+MSUhIzwkIjJiVTYmbyIpenhTISM9JCIxS3RGJnBQTzQlISM8JCIwQlY/QXglNFQhIzskIjJtODQpW25KRFQhIz0kIjFWXWR2aTpUVCEjPCQiMV40TS1lKnA6JSEjPCQiMWNvNUhgJEc8JSEjPCQiMk53c2UmW24pPSUhIz0kIjBuUUVROVg/JSEjOyQiMW9YUzRSTj9VISM8JCIxdS88T00+T1UhIzwkIjI5UU9IJ0guX1UhIz0kIjJ1Ry0oKltzeUUlISM9JCIxJT5vayw3UEclISM8JCIxLFRCVjpiKkglISM8JCIydisrKzIiUjpWISM9JCIxMGZ3J2ZJN0wlISM8JCIxNz1gQiwyWlYhIzwkIjIlPnhIXSc0SE8lISM9JCIyYWlqcTxcKHlWISM9JCIxSyZIUXEpZSVSJSEjPCQiMVFhZkkjRy9UJSEjPCQiMmNNaHR2bmlVJSEjPSQiMV5zNyVHMkBXJSEjPCQiMDokKjMibyV6WCUhIzskIjFjIWZ3TCd5dFchIzwkIjFqXFVrZWkqWyUhIzwkIjAoMz4iUmxhXSUhIzskIjJieGN6IlxJQFghIz0kIjJPb0FaV1dyYCUhIz0kIjEqZSlbclIpSGIlISM8JCIxKFthIylcQilvWCEjPCQiMSRSP10talllJSEjPCQiMSxqeV5EXStZISM8JCIxMkFieT9NO1khIzwkIjE5Ij1gZyI9S1khIzwkIjFAUzNLNi1bWSEjPCQiMncjKlwpZTEnUW0lISM9JCIyWSNlaCY9Kyh6WSEjPSQiMUs8UTcoUmJwJSEjPCQiMVF3OVIjejhyJSEjPCQiMmJhOGZ3PXNzJSEjPSQiMjpYekVIZUl1JSEjPSQiMWVgVz55KillWiEjPCQiMWw3QFl0dHVaISM8JCIyRTt4SChvZCF6JSEjPSQiMiVwSXUqUjtrIVshIz0kIjF3KjNsI2ZEQVshIzwkIjEkKVtGYGE0UVshIzwkIjEqeVMrKVwkUiZbISM8JCIyYnAxb111KHBbISM9JCIxLUVkTFNoJilbISM8JCIvJlEuY2A5IVwhIzokIjEyVzUoMyRIPFwhIzwkIjJNSnFRaEtKJFwhIz0kIjBBTzE5cypbXCEjOyQiMUZAU247IlsnXCEjPCQiMUwhb1Q+XjEpXCEjPCQiMCVSJDRzIVwnKlwhIzskIjFQKSpwWi1MN10hIzwkIjFYZFl1KHAiR10hIzwkIjFeO0IsJDRTLyYhIzwkIjFldip6IylbKWZdISM8JCIxa013YSQpb3ZdISM8JCIxciRIOil5XyI0JiEjPCQiMXlfSDN1TzJeISM8JCIxdzYxTnA/Ql4hIzwkIjEjM0Y9WVkhUl4hIzwkIjEqKUhmKSlmKVs6JiEjPCQiMmIqKWVgXkQyPCYhIz0kIjI6IVs3VV1jJz0mISM9JCIxMzIqKW9YUy1fISM8JCIyY2hjYzRXIz1fISM9JCIxOERVQU8zTV8hIzwkIjBVKT1cSiMqXF8hIzskIjFFViZmbmlkRSYhIzwkIjFMLXMtQWciRyYhIzwkIjA5J1tIPFcoSCYhIzskIjJiL19pRCJHOGAhIz0kIjFgeiwkeT8iSGAhIzwkIjFoUXk0LidcTSYhIzwkIjJ1dlxsJCkqemdgISM9JCIyTW06TE9SbVAmISM9JCIyOmQiMyEqKXlDUiYhIz0kIjJ2WlpvVD0kM2EhIz0kIjElUThPJXo6Q2EhIzwkIjBIei5aKCoqUmEhIzskIjEoPlhyKnAkZVgmISM8JCIxJjQ2Ul93O1omISM8JCIxLXFuXWdeKFsmISM8JCIydSFIV3hiTi5iISM9JCIyYiIpM1U1Jj4+YiEjPSQiMjtzdTRqTV1gJiEjPSQiMndpU3g6dTNiJiEjPSQiMU1sXSVvOG5jJiEjPCQiMk1WczdAYERlJiEjPSQiMiVSJFEhUUZSKWYmISM9JCIxWFUhW0VLVWgmISM8JCIxXyxkInpyK2omISM8JCIwMU8kPTgiZmsmISM7JCIyYyc+NVgzdmhjISM9JCIxdHknPVAhZnhjISM8JCIxclBqKSopSE1wJiEjPCQiMnVuKlJEJXAjNGQhIz0kIjJOZWxAJiozXnMmISM9JCIwXEoqeSVbNHUmISM7JCIyd1IocDAhKXljZCEjPSQiMS5MWUt2aXNkISM8JCIwQEgjZnFZKXkmISM7JCIxM14qZmUxViFlISM8JCIxOTV3N2g5P2UhIzwkIjFAcF9SYylmJGUhIzwkIjJ2I0dIbV4jPSZlISM9JCIxTihlSXBrdydlISM8JCIyO2tDKT5VXSQpZSEjPSQiMVswZllQTSoqZSEjPCQiMVprTnRLPTpmISM8JCIxX0I3K0ctSmYhIzwkIjImZiMpKW9LaW8lZiEjPSQiMWxUbGA9cWlmISM8JCIxcytVIVFUJnlmISM8JCIyLylmPTI0USUqZiEjPSQiMScpPSZSVj8tLCchIzwkIjEjejwyJypmZy0nISM8JCIyJSpvJFsoWyoqPS8nISM9JCIyYWZcVSxSeDAnISM9JCIyTl06NWF5TjInISM9JCIwVCJ5biE9JSozJyEjOyQiMTt0YSVmZF81JyEjPCQiMUJLSkByNEBoISM8JCIxSCJ6IVttJHA4JyEjPCQiMUddJVs8d0Y6JyEjPCQiMU00aCxkaG9oISM8JCIxVG9QR19YJT0nISM8JCIxWkY5YlpIK2khIzwkIjJPbDM+R01oQCchIz0kIjBjdSczUSg+QichIzskIjFvL1dOTCJ5QychIzwkIjFtaj9pR2xqaSEjPCQiMXJBKCopUSNcemkhIzwkIjF5IlFkIj5MJkgnISM8JCIxJjMvRFdyNkonISM8JCIxIyoqcCNwNCxGaiEjPCQiMSkqZS4nXF1HTSchIzwkIjEwPSFHLSFwZWohIzwkIjEueGNcJkhYUCchIzwkIjBoTGoycC5SJyEjOyQiMTsmKjQuJzNpUychIzwkIjFBYScpSCJbP1UnISM8JCIxSDhqY3cpeVYnISM8JCIxUHNSJD1GUFgnISM8JCIxVUo7NW5jcGshIzwkIjFUIUhwQjFhWychIzwkIjFcXHBqZEMsbCEjPCQiMWEzWSFIJjM8bCEjPCQiMHdFcyJbI0hgJyEjOyQiMW1FKlJNayhbbCEjPCQiMXUmZTIoUWdrbCEjPCQiMFtDdlJWL2UnISM7JCIxeS5IQ0hHJ2YnISM8JCIxJ0djNVhBQGgnISM8JCIxIz5BeSg+J3ppJyEjPCQiMSg0KWUvOiFRaychIzwkIjEwU05KNWtmbSEjPCQiMTcqPiJlMFt2bSEjPCQiMT1lKVszPzhwJyEjPCQiMTo8bDYnZnJxJyEjPCQiMUN3VFEiKipIcychIzwkIjBgJD1sJ1EpUW4hIzskIjFPJVw+PnlZdichIzwkIjFUYHI9eF5xbiEjPCQiMVw3W1hzTid5JyEjPCQiMWNyQ3NuPi1vISM8JCIxYEksKkhPIT1vISM8JCIwJyp5ZCNlKFEkbyEjOyQiMW9bYV9gclxvISM8JCIxdDJKeltibG8hIzwkIjBvd2dTJVIiKW8hIzskIjEnZVVHJFJCKCpvISM8JCIxJVwzJ2ZNMjhwISM8JCIvV1AnKUgiKkdwISM6JCIxKUhTSl5fWiVwISM8JCIxMGkhKlI/ZmdwISM8JCIxN0BubTpWd3AhIzwkIjE8IVFNNHJBKnAhIzwkIjFDUj8/MTYzcSEjPCQiMUspcHA5XVItKCEjPCQiMVFkdHQnKnlScSEjPCQiMU87XSsjSGMwKCEjPCQiMVV2RUYobzkyKCEjPCQiMFhMU0QzdDMoISM7JCIxYyQqeiF5Wko1KCEjPCQiMWhfYzJ0KSo9ciEjPCQiMXA2TE1vI1s4KCEjPCQiMXdxNGhqbV1yISM8JCIxdEgneSllXW1yISM8JCIwKSlHWVRYQj0oISM7JCIxJ3klUlRcPSk+KCEjPCQiMSRwZyJvVy05cyEjPCQiMSlmRVwqUicpSHMhIzwkIjExRHBATnFYcyEjPCQiMTolZSVbSWFocyEjPCQiMEpDX2QjUXhzISM7JCIxPC0qPjVBS0goISM8JCIxQ2h2RzsxNHQhIzwkIjFLP19iNiFcSyghIzwkIjFQekcjb1MyTSghIzwkIjFXUTA0LWVjdCEjPCQiMHY+ZXQ+Q1AoISM7JCIxXGNlaSNmIylRKCEjPCQiMWM6Tip5KTQvdSEjPCQiMWh1NjskUSo+dSEjPCQiMW9MKUcleXhOdSEjPCQiMXUjXCdwdGhedSEjPCQiMSI9Omsqb1hudSEjPCQiMSozIj1Ca0gkWyghIzwkIjEnKXAlKlxmOCpcKCEjPCQiMSQqR3J3YShcXighIzwkIi8peU0rOjNgKCEjOiQiMTFaQ0lYbFl2ISM8JCIxODEsZFNcaXYhIzwkIjBfd1BlTCR5diEjOyQiMUVDYTVKPCVmKCEjPCQiMUskM3RqNytoKCEjPCQiMUtVMmtAJmVpKCEjPCQiMVAsJTNwInBUdyEjPCQiMVdnZzw3YGR3ISM8JCIxXD5QVzJQdHchIzwkIjFkeThyLUAqbyghIzwkIjFrUCF6elxdcSghIzwkIjBucFlLKikzcyghIzskIjFvYlZeKUdudCghIzwkIjF3OT95JG9EdighIzwkIjEiUW5cIXpTb3ghIzwkIjEpR0w8VlpVeSghIzwkIjElPipcZXAzK3khIzwkIjEsXkUmW0VmInkhIzwkIjEzNS43Z3dKeSEjPCQiMTFwelFiZ1p5ISM8JCIxN0djbF1XankhIzwkIjE9KEdCZiVHenkhIzwkIjFEWTQ+VDcmKnkhIzwkIjFLMCdla2o0InohIzwkIjBXRUU8Lm8jeiEjOyQiMVhCUipwVUUleiEjPCQiMVcjZWhBI1tleiEjPCQiMDpDSHZAVih6ISM7JCIxZCtwejc7ISp6ISM8JCIxa2ZYMTMrMSEpISM8JCIxcD1BTC4lPS0pISM8JCIxeHgpKmYpencuKSEjPCQiMSRvYG5RPk4wKSEjPCQiMSJlPk4iKmUkcCEpISM8JCIxKVsmR1MlKT4mMykhIzwkIjEkUl5xJ3ouLCIpISM8JCIxLHQiUVx4bzYpISM8JCIxM0tlP3FySyIpISM8JCIxOSJcdGFjJlsiKSEjPCQiMUBdNnVnUmsiKSEjPCQiMT00KTNnTi09KSEjPCQiMUVva0ZeMic+KSEjPCQiMUtGVGFZIj5AKSEjPCQiMVEneTY9YXhBKSEjPCQiMVhYJXpxJGZWIykhIzwkIjFfL3JNS1ZmIykhIzwkIjFkalpoRkZ2IykhIzwkIjFjQUMpRzc2SCkhIzwkIjFrIjNdIj0mcEkpISM8JCIxcFN4VDh6QSQpISM8JCIxdSpSJm8zalEkKSEjPCQiMSUpZUkmUnFXTikhIzwkIjEqeXI/Iyo0LlApISM8JCIxJ3BQKVslXGhRKSEjPCQiMSRmLmMoKikpPlMpISM8JCIxLCZwQl1HeVQpISM8JCIxM2E4SCFvT1YpISM8JCIxODghZmIyJlwlKSEjPCQiMEFuRTNaYFkpISM7JCIxRUpWNG09IlspISM8JCIxTCEqPk9oLShcKSEjPCQiMCVcJ0htbEdeKSEjOyQiMVEzdCo9MChHJikhIzwkIjFYblw7WmFXJikhIzwkIjFfRUVWVVFnJikhIzwkIjFkJkcreEJpZCkhIzwkIjFsV3onSGo/ZikhIzwkIjFzLmNCRyF6ZykhIzwkIjF4aUtdQnVCJykhIzwkIjF3QDR4PWVSJykhIzwkIjElM2VRU0BhbCkhIzwkIjEqKVJpSTRFcicpISM8JCIxJSopKlFkLzUobykhIzwkIjEtZTolKSpSSHEpISM8JCIxNDwjNF56KD0oKSEjPCQiMTt3b1AhPll0KSEjPCQiMThOWGsmZS92KSEjPCQiMUAlPjc0KUhtKCkhIzwkIjE9YCl6aFBAeSkhIzw3YGpsJCIxRSMqW109UkcpKSEjPSQiMHJBR09AdykqKSEjPCQiMSg+Y14oMyZvOSohIz0kIjEjbypbKFEhMzEkKiEjPSQiMDNCKSoqKTRgWSohIzwkIjFsbDo3JVJYaSohIz0kIjAwIVxDKm9QeSohIzwkIjFQTiNvVikqSCUqKiEjPSQiMkFxOlx6QS0sIiEjPSQiMjIwXGh1WGgtIiEjPSQiMiUqUiNRKHBvPy8iISM9JCIyenU6J1s7KnowIiEjPSQiMngzXCkqZjlSMiIhIz0kIjFPQzNediQpKjMiISM8JCIyWnk6Ql1nZDUiISM9JCIyTThcTlgkb0A2ISM9JCIyPlsjeS9rZ1A2ISM9JCIyLyRlLGMkSE46IiEjPSQiMip5IlxzSV8lcDYhIz0kIjIoPURbZV9QJj0iISM9JCIydSdlcjQjKUgsNyEjPSQiMmZAXDQ7QHNAIiEjPSQiMldjIz03VDlMNyEjPSQiMkgiZlRqcTFcNyEjPSQiMjpFXFksISpcRSIhIz0kIjBoIyllJ0giNEciISM7JCIyKFxmNjxmJG9IIiEjPSQiMiMpSFwkbyllRkoiISM9JCIyb2sjZT49b0c4ISM9JCIyYipmIjN4L1lNIiEjPSQiMVckXD9zRjBPIiEjPCQiMkRwI0d0MVh3OCEjPSQiMjkvO1hpdEJSIiEjPSQiMjNRXGRkJ0gzOSEjPSQiMiRIRilwXz5VVSIhIz0kIjJ5MjsjeUM5UzkhIz0kIjJsVVwlSGExYzkhIz0kIjJfeCNvIVEpKT5aIiEjPSQiMlA3Oz5MNnpbIiEjPSQiMkFaXEpHTVFdIiEjPSQiMTdHUU1zdj46ISM8JCIyLjs7Yz0hb046ISM9JCIyJDQmXG84LjtiIiEjPSQiMngmRzMpM0V2YyIhIz0kIjJsPzskUiFcTWUiISM9JCIxYiZcMCo+UCpmIiEjPCQiMS5IeVRcSDo7ISM8JCIyTEM7SSp5QEo7ISM9JCIyPWZcVSUzOVo7ISM9JCIwJUhbJnpqSW0iISM7JCIyKSlHO251JykqeTshIz0kIjJ0alx6cDRccCIhIz0kIjJlKUg9XEUkM3IiISM9JCIyWkw7L2dibnMiISM9JCIxdSdcO2J5RXUiISM8JCIyRS0kKUddLCdlPCEjPSQiMXJqNmFXX3U8ISM8JCIyJz4oXGBTWi96IiEjPSQiMiZvSWVjLlAxPSEjPSQiMnRUO3lJJEhBPSEjPSQiMmJ3XCFmaUBRPSEjPSQiMmA1JEc1I1JUJj0hIz0kIjFha15oQDFxPSEjPCQiMkUhKVxGNiYpZik9ISM9JCIyMzokKVIxMz4hPiEjPSQiMicqXDtfLEp5Ij4hIz0kIjFbKVxrJ1J2TD4hIzwkIjJtPiRvPHBuXD4hIz0kIjJsYDsqbykqZmw+ISM9JCIxJikpXCwjR18iKT4hIzwkIjJOQiRRcmRXKCo+ISM9JCIxI2U7RXNvTCwjISM8JCIyLyQqXFFuIkhIPyEjPSQiMiR6SzNEWUBYPyEjPSQiMnlpO2pkUDYxIyEjPSQiMncnKlx2X2dxMiMhIz0kIjJlSiR5eU0pSDQjISM9JCIyVm07K1YxKjNAISM9JCIxOCtEIlFIWzcjISM8JCIyO08kW0tCdlNAISM9JCIwcjtQR3ZtOiMhIzskIjInZSsmXEIpZnNAISM9JCIydVMkPSc9QCYpPSMhIz0kIjFablRQVFcvQSEjPCQiMmU0XScpM24uQSMhIz0kIjJWVyQpKVIrSE9BISM9JCIyQ3o7NipIQF9BISM9JCIyODldQiVmOG9BISM9JCIyKSpbJGUkKillU0cjISM9JCIyJ1FvIlslPSkqKkgjISM9JCIxeSwwJ3ovZkojISM8JCIybV8kR1p4Iz1MIyEjPSQiMmEob14pcF14TSMhIz0kIjJPQV0oXE9uakIhIz0kIjJDZCQpNGcnZnpCISM9JCIxQHBAXyY+YlIjISM8JCIyJXAtWC5EVzZDISM9JCIyIzRPb2FhT0ZDISM9JCIyeCZwImZTKUdWQyEjPSQiMm1JXXJONiNmQyEjPSQiMWJPUTNWOHZDISM8JCIySys8J2ZzMCJcIyEjPSQiMjxOXTNAISlwXSMhIz0kIjIxcSQzaUohSF8jISM9JCIyLy88TDZFKVFEISM9JCIxKlFdWDFcWmIjISM8JCIydXQkeTo/bnFEISM9JCIxJzM8cSdcZidlIyEjPCQiMldWXSM9el4tRSEjPSQiMkt5JFtwM1c9RSEjPSQiMjk4PDIjUU9NRSEjPSQiMXIvJj54J0ddRSEjPCQiMCNRPUIoNGltIyEjOyQiMidvclR1RTgjbyMhIz0kIjE8MGxEYzApcCMhIzwkIjJjJ1Epb2R5UnIjISM9JCIxOXM2RzohKkhGISM8JCIyRGNdJHpXI2V1IyEjPSQiMkYhUmVJdXVoRiEjPSQiMjdEPD1RcXd4IyEjPSQiMigqZl1JTCRmJHojISM9JCIydiVSRyVHOyY0RyEjPSQiMm5IPGJCUmEjRyEjPSQiMmNrXW49aTglRyEjPSQiMlAqUil6OCZHZEchIz0kIjJBTTwjKjMzSyhHISM9JCIyPG9dLy9KIiopRyEjPSQiMUpTbyIqUjAwSCEjPCQiMiV6dCJIJXAoNCNIISM9JCIxRzI6JSopKipvJEghIzwkIjJrMiVRWEcjRyZIISM9JCIxRHVoJ3pYKG9IISM8JCIyRnhdeXVvWSlIISM9JCIySzYlMypwImYrSSEjPSQiMjhZPC5sOWwsJCEjPSQiMjAiM2Isd1ZLSSEjPSQiMiRlVHlfME9bSSEjPSQiMnZdPFNdJEdrSSEjPSQiMmsmM0Riaz8hMyQhIz0kIjJYPyVbMSVIaDQkISM9JCIxV3ZyZEIwN0ohIzwkIjEjKjMmKjNgKHo3JCEjPCQiMjJDJT1nIykqUTkkISM9JCIwZjw5QEApZkohIzskIjFRNGxpVHV2SiEjPCQiMShHJSlRNm47PiQhIzwkIjFOdzZsK2YySyEjPCQiMXY0TjtJXkJLISM8JCIxQ1ZlbmZWUkshIzwkIjFzdyIpPSplYEQkISM8JCIxQDUwcT1HckshIzwkIjFwVkdAWz8oRyQhIzwkIjE8eF5zeDcuTCEjPCQiMmwxXlBzXSE+TCEjPSQiMTJXKVxudFxMJCEjPCQiMlh2PGlpJyozTiQhIz0kIjEuNlh4Jj5vTyQhIzwkIjI6WCVvR0R1I1EkISM9JCIxLHkiKnphbSlSJCEjPCQiMVw2OkolKWU5TSEjPCQiMShcJVEjUTYwViQhIzwkIjFQeWhMVlZZTSEjPCQiMmM9XltHZEJZJCEjPSQiMU5YM08tR3lNISM8JCIyRSl5Sig9LlVcJCEjPSQiMUs3YlFoNzVOISM8JCIyJ3pYeSozXGdfJCEjPSQiMUd6LFQ/KD5hJCEjPCQiMW83RCMqXCp5YiQhIzwkIjJ2aCVbVnoiUWQkISM9JCIxbHpyJSozdSplJCEjPCQiMTk4JmYlUW0wTyEjPCQiMWlZPSh6J2VATyEjPCQiMjosPSVbKDR2aiQhIz0kIjBPXicqcEtNbCQhIzskIjIlKnAlKTNsYiRwTyEjPSQiMVshPUBneV9vJCEjPCQiMmtSXkxiLDdxJCEjPSQiMVhaZS9YNzxQISM8JCIyTTQ9ZVhaSXQkISM9JCIyRVdecVNxKltQISM9JCIyL3olR2VMKlt3JCEjPSQiMVIiPSY0aiIzeSQhIzwkIjIleTl2ZyNSbnokISM9JCIydyNbKT5AaUUiUSEjPSQiMXciPUs7JmVHUSEjPCQiMllfXlc2M1glUSEjPSQiMXRbb2w1VmdRISM8JCIxQSM9cCxhaihRISM8JCIxcjo6b3BGIypRISM8JCIwIlxRPioqPjNSISM7JCIxZSM9MShHN0NSISM8JCIxMjsmPSNlL1NSISM8JCIxY1wzdChvZiZSISM8JCIxLyQ9VnMiKj0oUiEjPCQiMWA7YnZZInkpUiEjPCQiMSxdeUV3dC5TISM8JCIxVCQ9IXkwbT5TISM8JCIxKm9eI0hOZU5TISM8JCIyJVFdWyFbMTowJSEjPSQiMShRPTxWSHUxJSEjPCQiMmF0XkhRX0wzJSEjPSQiMSUzJj1NYEYqNCUhIzwkIjFMJT1hRyk+OlQhIzwkIjJFeF5tQkA2OCUhIz0kIjFAXil5PVdxOSUhIzwkIjFwJT0iUnInSDslISM8JCIxPT1OITQhKil5VCEjPCQiMW1eZVRJIls+JSEjPCQiMTomPUcqZnQ1VSEjPCQiMk8nPTBXKmVtQSUhIz0kIjEvX0cmKj1lVVUhIzwkIjI6Yj1sJVtdZVUhIz0kIi8+dih6RldGJSEjOiQiMiZbXykqWzJOIUglISM9JCIxKGY9LXF0aUklISM8JCIxWT5YXm0+QVYhIzwkIjElSCZvLSc+IlFWISM8JCIxTSc9UmJVU04lISM8JCIyTSk+OjBiJypwViEjPSQiMUpgUWMlKSllUSUhIzwkIjBvPXdTNj1TJSEjOyQiMUg/JillVnQ8VyEjPCQiMXhgMzV0bExXISM8JCIxRSg9OEUhZVxXISM8JCIyVzJfREAuYlklISM9JCIyWVQmeWpoVSJbJSEjPSQiMWooPV02XHRcJSEjPCQiMTZARG0/RjhYISM8JCIyJWZhWzxdPkhYISM9JCIyJjMpPShvejZYWCEjPSQiMWVAJio+NC9oWCEjPCQiMmJdJj1yUSdwZCUhIz0kIjFYKT1DI28pR2YlISM8JCIyTj5fT3g0KTNZISM9JCIxVmIpW3NLWmklISM8JCIyMCopPWhuYjFrJSEjPSQiMENfdGl5bGwlISM7JCIxKWUmZXk6XXNZISM8JCIxTyo9KUhYVSlvJSEjPCQiMXdBMCJbWlZxJSEjPCQiMURjR0svRj9aISM8JCIxdCo9TlEkPk9aISM8JCIyQ0tfWkw7QHYlISM9JCIwbiYpZkdSIW9aISM7JCIxPiE+c0JpUnklISM8JCIxb0JYKT0mKSkqeiUhIzwkIjEyZG9SIjNlIlshIzwkIjFjIT40NEo8JFshIzwkIjEwQzpVU2xaWyEjPCQiMWBkUSQqcGRqWyEjPCQiMSwiPlklKipcelshIzwkIjBYX2UqR1UmKlshIzskIjEpeiYzWmVNNlwhIzwkIjFRIj4kKXpvcyNcISM8JCIxKFtfJlw8PlZcISM8JCIxTmV5K1o2ZlwhIzwkIjElPT4/bFBdKFwhIzwkIjJEYF9LZ2c0KlwhIz0kIjEiKWVbYU4pbysmISM8JCIwQj5kXTFHLSYhIzskIjBkX3BYSChRXSEjOyQiMT5mPTNDbGFdISM8JCIxbiM+JWZgZHFdISM8JCIxOkVsNSQpXCczJiEjPCQiMk8nZik9RUBDNSYhIz0kIjE3JD5KQFckPV4hIzwkIjFpRU5rckVNXiEjPCQiMjorJ2U6LD5dXiEjPSQiMidbJD5vMThoOyYhIz0kIjEocF8hPWcuIz0mISM8JCIyYy8nR3AqZXo+JiEjPSQiMSVSPjAjPilRQCYhIzwkIjFXRnZyWyEpSF8hIzwkIjJENCcpSCN5c1hfISM9JCIxSyU+VXhdO0UmISM8JCIweV9hc3R2RiYhIzskIjFIaG93bVwkSCYhIzwkIjJ2Wj56aT4lNGAhIz0kIjFFRzp6RE1EYCEjPCQiMlg8J1FJYkVUYCEjPSQiMUImPjtbKT1kYCEjPCQiMjooRyZHVjZKUCYhIz0kIjE2aTMlUU0hKlEmISM8JCIyJWYmPmBMZFxTJiEjPSQiMTNIYidHISkzVSYhIzwkIjJrRCd5UEshb1YmISM9JCIxMCc+ISo9RUZYJiEjPCQiMk0mSERTIlwnb2EhIz0kIjEtalsiNHNYWyYhIzwkIjFVJz5GLyZcK2IhIzwkIjEiKkgmUip6VDtiISM8JCIxUmo9WDRNS2IhIzwkIjEpbz5rKlFFW2IhIzwkIjFQSWxabz1rYiEjPCQiMllRJykpKXo0LGUmISM9JCIxTCg+LHZLZ2YmISM8JCIyWTJgOHFiPmgmISM9JCIxQmtlXyd5eWkmISM8JCIweD5RZyxRayYhIzskIjE+SjBiWHNmYyEjPCQiMidva0cxdmt2YyEjPSQiMTspPnZYcTpwJiEjPCQiMWtKdjNNXDJkISM8JCIyV10nKSpmalRCZCEjPSQiMk8mKT43SlIkUmQhIz0kIjI5P2BDRWlfdiYhIz0kIjBiJ284Xz1yZCEjOyQiMSoqKT5cOzNyeSYhIzwkIjJ3Q2BoNkpJIWUhIz0kIjEnZidRblMmKj1lISM8JCIyYyQqPic9cShbJGUhIz0kIjElR2ApcCoqel1lISM8JCIyRWonM0BIc21lISM9JCIxIikqPkIoZWsjKWUhIzwkIjInSExiQilvJikqZSEjPSQiMXlteXU8XDlmISM8JCIybS0/Z3M5LyRmISM9JCIxbUxEeHdMWWYhIzwkIjJYcidbRzFFaWYhIz0kIjJXMT8oek49eWYhIz0kIjE4TSY0YDFUKmYhIzwkIjFobj0jW0grLCchIzwkIjA2P01WX2YtJyEjOyQiMiVlTWwlUXY9LychIz0kIjExbyllTCl6ZGchIzwkIjFZLDcoR0BQMichIzwkIjElXGAkUVVrKjMnISM8JCIxWG9lKj1uYjUnISM8JCIxIz4/MzkhXEBoISM8JCIyL2FgPzQ4dTgnISM9JCIwKm9HVmdMYGghIzskIjJ1Qj9YKiplI3BoISM9JCIxeE52WD49Jj0nISM8JCIyYSNwKXAqWzUsaSEjPSQiMXYtQVt5LTxpISM8JCIyQmlgJSp6XUhCJyEjPSQiMjoocG9dUCgpW2khIz0kIjBLPz5xJ3praSEjOyQiMG5gSmw+MkcnISM7JCIwLChRL0VrJ0gnISM7JCIxZC5pYmJjN2ohIzwkIjExUCZvXSlbR2ohIzwkIjFhcTNlOVRXaiEjPCQiMS4vSzRXTGdqISM8JCIxXlBiZ3REd2ohIzwkIi9yeTYuPSNSJyEjOiQiMFc/SUUuIjNrISM7JCIxKXlgVUBFU1UnISM8JCIxUHJbbCJcKlJrISM8JCIxJ1s/bjZzZVgnISM8JCIxTlEmejEmenJrISM8JCIxIz0oPT4hPXhbJyEjPCQiMUowVXE0ay5sISM8JCIxc1FsQFJjPmwhIzwkIjBBKClHKG9bTmwhIzskIjFuMDdDKTQ5YichIzwkIjE6Uk52RkxubCEjPCQiMW1zZUVkRCRlJyEjPCQiMTkxI3lueSIqZichIzwkIjFqUjBIOzU6bSEjPCQiMS10RyFlQzVqJyEjPCQiMV4xX0p2JXBrJyEjPCQiMSoqUnYjW3FHbSchIzwkIjFadClSViR6eW0hIzwkIjEncD9fUTtacCchIzwkIjFXU1hPJFIxcichIzwkIjEkUihvKEdpbHMnISM8JCIxTDIjKlFfW1VuISM8JCIxIzNhLD4zJWVuISM8JCIxSnVRVDZMdW4hIzwkIjF6MmkjNGEteichIzwkIjFGVCZRL3hoIW8hIzwkIjF3dTMmKioqNEFvISM8JCIxRDNLWUgtUW8hIzwkIjFsVGIoKmUlUiZvISM8JCIxNnZ5WylvKXBvISM8JCIxaDMtKz16JilvISM8JCIxNFVEXlpyLHAhIzwkIjFkdlsteGo8cCEjPCQiMTM0c2AxY0xwISM8JCIxZFUmXGckW1xwISM8JCIxLnc9Y2xTbHAhIzwkIjFWNFUyJkg4KXAhIzwkIjEjSGEnZUNEKCpwISM8JCIxVHcpKTRhPDhxISM8JCIxKik0N2gkKTRIcSEjPCQiMVBWTjc4LVhxISM8JCIxKG8oZWpVJTQxKCEjPCQiMU01I1tAbm8yKCEjPCQiMXZWMG0seiM0KCEjPCQiMUN4RzxKcjNyISM8JCIxczVfb2dqQ3IhIzwkIjFAV3Y+IWYwOSghIzwkIjFweCk0KD5bY3IhIzwkIjE9NkFBXFNzciEjPCQiMW1XWHR5Syk9KCEjPCQiMTB5b0MzRC9zISM8JCIxYTYjZnh0LEEoISM8JCIxLVg6Rm40T3MhIzwkIjFgeVF5Jz4/RCghIzwkIi83aUhFJXpFKCEjOiQiMVtYJjNlbFFHKCEjPCQiMSgqeTNLJil5KkgoISM8JCIxUDdLJFs2ZEooISM8JCIxJ2VhWFZNO0woISM8JCIxTHp5JlFkdk0oISM8JCIxJEdAcUwhW2p0ISM8JCIxSllEKUcuJXp0ISM8JCIxenpbUmlLJlIoISM8JCIxRjhzIT5cN1QoISM8JCIxcFkmPjlzclUoISM8JCIxPSEpPSQ0JjRWdSEjPCQiMWs4VVchPSFmdSEjPCQiMTlabCYqNCVcWighIzwkIjFqISkpbyVSJzNcKCEjPCQiMFRAIikqb3kxdiEjOyQiMWVaTlwpNEZfKCEjPCQiMSk0KWUrR2pRdiEjPCQiMVs5Iz12YlhiKCEjPCQiMSZ6YUlxeS9kKCEjPCQiMVgiKUdhO1MnZSghIzwkIjEkXEBiZ0NCZyghIzwkIjFVW3ZjdkM9dyEjPCQiMD4pKXpdcVRqKCEjOyQiMGFAI2ZNNF13ISM7JCIxeltYNWssbXchIzwkIjFGIylvaCRSPm8oISM8JCIxdzojSEppeXAoISM8JCIxQ1w6a195OHghIzwkIjF1IylROiMzKEh4ISM8JCIxQTtpbTZqWHghIzwkIjAoXCZ5NmE6dyghIzskIjBKKTNwcVp4eCEjOyQiMWY7Sz8rUyR6KCEjPCQiMTNdYnJISzR5ISM8JCIxYSQpeUFmQ0R5ISM8JCIxMDwtdSlvNiV5ISM8JCIxYF1ERD00ZHkhIzwkIi8lKVt3Wix0eSEjOiQiMHVAeHNQKikpeSEjOyQiMSkzYip5MSdbIXohIzwkIjFRJSk9SU95P3ohIzwkIjEneUA5ZTFuJHohIzwkIjFOXmxLJkhFJnohIzwkIjEkWykpUVtfJm96ISM8JCIxSz03TmFaJSl6ISM8JCIxc15OJ1EpUishKSEjPCQiMF8pZVA4SzshKSEjOyQiMXA9IykpR1dBLikhIzwkIjE7XzBTcztbISkhIzwkIjFtJilHIj4hNGshKSEjPCQiMTo+X1VKLCEzKSEjPCQiMWtfdiQ0T2Y0KSEjPCQiMS8nKSlcL2Y9NikhIzwkIjFePkEnKj55RiIpISM8JCIxKkhidSVccVYiKSEjPCQiMVsnKW8pKnlpZiIpISM8JCIxKSo+IypcM2J2IikhIzwkIjFXYDosUVoiPikhIzwkIjEncClRX25SMiMpISM8JCIxTj9pLig+TEEpISM8JCIxJFFiW2xVI1IjKSEjPCQiMUooKTMxYztiIykhIzwkIjAzQXRiKTNyIykhIzskIjBWYiYzOiwoRykhIzskIjF3KCl5ZlckSEkpISM8JCIxREAtNnUmKT0kKSEjPCQiMW1hRGkueU0kKSEjPCQiMTkpKVs4THFdJCkhIzwkIjFoQHNraWltJCkhIzwkIjE0YiZmQFxEUSkhIzwkIjAnKSk9bkBaKVIpISM7JCIxM0FVPV5SOSUpISM8JCIxZGJscCE9LlYpISM8JCIxJyopKSkzLVRpVykhIzwkIjFXQTdzUjtpJSkhIzwkIjEkZmJMI3AzeSUpISM8JCIxVCopZXUpNFNcKSEjPCQiMEhBZSNHJCo0JikhIzskIjFRYzB4ZCZlXykhIzwkIjEoKSopR0coeTxhKSEjPCQiMU5CX3o7cWQmKSEjPCQiMXdjdklZaXQmKSEjPCQiMUQhKik+ZVomKmUpISM8JCIxc0JBTDBaMCcpISM8JCIxQGRYJVskUkAnKSEjPCQiMDIqb05rSlAnKSEjOyQiMT5DI3BRUktsKSEjPCQiMW1kOlFCO3AnKSEjPCQiMTEiKlEqRyYzJm8pISM8JCIxY0NpUyMzNXEpISM8JCIxLmUmPT5KcHIpISM8JCIxXiIqM1ZUJkd0KSEjPCQiMS1ESyU0eChbKCkhIzwkIjFeZWJYK3FrKCkhIzwkIjEoPip5JypIaSF5KSEjPCQiMU9ELVtmYSd6KSEjPCQiMSkpZUQqKilvQyIpKSEjPCQiMUYjKltdPVJHKSkhIzw3YGpsJCIxbydSZXc5MSgpKSEjPSQiMWQwczhlZ0khKiEjPSQiMVg5Z2hvZiE+KiEjPSQiMU1CWzR6ZV0kKiEjPSQiMU1KT2QqeTBeKiEjPSQiMUFTQzArZHEnKiEjPSQiMCJcN2A1Y0kpKiEjPCQiMSp6MDU1XzAqKiohIz0kIjIobycpKVtKYV0sIiEjPSQiMnV2dyc+TTBKNSEjPSQiMmslW1lDRDBaNSEjPSQiMl4kSERIOzBqNSEjPSQiMl4sVFN0XSF6NSEjPSQiMS8iSClRKVxdNCIhIzwkIjJHPjxPJSpbNTYiISM9JCIyPUcwJVshW3E3IiEjPSQiMjBQJD5gci9WNiEjPSQiMiRmOSl6RFkhZjYhIz0kIjIjWyZwRk9YXTwiISM9JCIxR3diblcvIj4iISM8JCIxPGRNc04vMjchIzwkIjJmIVE4eEUvQjchIz0kIjJaKj0jPnlUIVI3ISM9JCIyTikqNG4pMy9iNyEjPSQiMkEyKVwiKipSNUYiISM9JCIyNzsnRyc0UnFHIiEjPSQiMVRVMiwjUUlJIiEjPCQiMihIQidlSVAhPjghIz0kIjIqPS9sNWsuTjghIz0kIjJ3XVFhXk41TiIhIz0kIjJrZkUtaU1xTyIhIz0kIjJhbzldc0xJUSIhIz0kIjJWeC0pSEcuKlIiISM9JCIyViYzZk0+Ljo5ISM9JCIxVip5JFI1Lko5ISM8JCIyPS5uVDlJcVciISM9JCIyMDdiKlsjSElZIiEjPSQiMig0S3VgJEchejkhIz0kIjImKUhKJmV1LSZcIiEjPSQiMnNRPkxjRTVeIiEjPSQiMW51NW9jLUY6ISM8JCIyZGImKkd4Q0lhIiEjPSQiMlxrJG94US1mOiEjPSQiMlB0ckMpSC12OiEjPSQiMkUjKWZzM0E1ZiIhIz0kIjI5InovIz5AcWciISM9JCIuT29IP0lpIiEjOSQiMDNDO1M+IVI7ISM7JCIyJHBAVDEmPV1sIiEjPSQiMnlEKzdoPDVuIiEjPSQiMm1NKSlmcjtxbyIhIz0kIjJhVncyI2UsLjwhIz0kIjJWX2tiI1wsPjwhIz0kIjJOaF8uLjlddCIhIz0kIjEkcFNeODg1diIhIzwkIjI9eUcqUkEsbjwhIz0kIjIxKG9yVzgsJHkiISM9JCIwJ1xdXC8sKnoiISM7JCIyKFtJSGEmNF0iPSEjPSQiMnM4IjNmJzM1JD0hIz0kIjJrQXBRdzJxJT0hIz0kIjJpSWQnb28raj0hIz0kIjEmUlhNKGYrej0hIzwkIjElW0wjeV0rJio9ISM8JCIyRmRAST0vNSI+ISM9JCIyO200eUcucSM+ISM9JCIyL3YoZiNSLUklPiEjPSQiMiRSZVEoXCwhZj4hIz0kIjIlPlI8LTErdj4hIz0kIjEzPydwcSoqNCo+ISM8JCIybzRdPCIpKSpwKyMhIz0kIjJjPVFsInoqSC0jISM9JCIyWEZFOC0oKipRPyEjPSQiMk9POWg3JypcMCMhIz0kIjFfQyE0QiYqNDIjISM8JCIxSzBwTlYqcDMjISM8JCIxQCd5L1ckKkg1IyEjPCQiMig0bkVYRCoqPUAhIz0kIjIjKnphK2wiKlw4IyEjPSQiMnQpRyVbdiEqNDojISM9JCIybCg0amYpKilwOyMhIz0kIjFsIT5XJyopKUg9IyEjPCQiMlU6MiNwISkpKik+IyEjPSQiMldCJipSPCgpXEAjISM9JCIxQkx5eWkpNEIjISM8JCIxNzlkJFEmKXBDIyEjPCQiMi1dZiQpWyUpSEUjISM9JCIyJSplWkpmJCkqeUEhIz0kIjF5YyR6cCMpXEgjISM8JCIydndCRiE9KTRKIyEjPSQiMnQlPV4yNClwSyMhIz0kIjJlJCoqSDcrKUhNIyEjPSQiMlktKTM8InoqZUIhIz0kIjE4aCg9QXlcUCMhIzwkIjJGP2ttS3g0UiMhIz0kIjEiSF85VndwUyMhIzwkIjBRU2lgdkhVIyEjOyQiMi1ZRzVrdSpRQyEjPSQiMihbbCJldXRcWCMhIz0kIjFRWWddRyg0WiMhIzwkIjJrcyNSYj4ocFsjISM9JCIyYyIzPWc1KEhdIyEjPSQiMS8qb1w7cSo9RCEjPCQiMksqcHZwI3BcYCMhIz0kIjF0XWF1JG80YiMhIzwkIjJCO0wkenUncGMjISM9JCIxXjc3JWVtSGUjISM8JCIyJFIkNCopb2wqKWYjISM9JCIyJUd1cCR6a1xoIyEjPSQiMnReJlspKlEnNGojISM9JCIxMU9GLkkncGsjISM8JCIxJ29oITNAJ0htIyEjPCQiMlt4XEdAaCp5RSEjPSQiMWt5ajwuJ1xwIyEjPCQiMWBmVUElZjRyIyEjPCQiMjwvOXNfZXBzIyEjPSQiMi04LT9qZEh1IyEjPSQiMT4tek9uJiplRiEjPCQiMiYqSHk6JWUmXHgjISM9JCIyeFFtaiVcJjR6IyEjPSQiMnNaYTYwYXAhRyEjPSQiMmRjVWY6YEgjRyEjPSQiMllsSTJFXypRRyEjPSQiMk11PWJPXlwmRyEjPSQiMUtvSXEvJjQoRyEjPCQiMUBcNHYmXHApRyEjPCQiMjErJCkpeidbSCFIISM9JCIwNHJZeVoqPUghIzskIjIkeSJmJSopbyVcJEghIz0kIjJ5RVpVKmYlNCZIISM9JCIyak5OISo0WHAnSCEjPSQiMVhNI1E/V0gpSCEjPCQiMU06aDNMJSopKkghIzwkIjE5JypSOEMlXCwkISM8JCIxLng9PTolNC4kISM8JCIxI3p2SGlTcC8kISM8JCIyLilRd0YoUkgxJCEjPSQiMiNwPmJLKVEqeUkhIz0kIjIoZStNUHokXDQkISM9JCIxWiJHQC9QNDYkISM8JCIxRmkicDlPcDckISM8JCIxO1ZxXl8kSDkkISM8JCIyV1MjXGNWJCplSiEjPSQiMk9cIUdoTSRcPCQhIz0kIjEkZW9nY0s0PiQhIzwkIjIxbmMzbkpwPyQhIz0kIjB3V2N4SUhBJCEjOyQiMCVHViEpKUgqUUshIzskIjFINEEmKSpHXEQkISM8JCIydyw0KzRHNEYkISM9JCIxMnJ6JT5GcEckISM8JCIxJj4mZSpIRUhJJCEjPCQiMlhHdFZTRCo9TCEjPSQiMXQ4OzRYI1xMJCEjPCQiMWAlXFJoQjROJCEjPCQiMVV2dD1GI3BPJCEjPCQiMGpETiM9I0hRJCEjOyQiMiU+UEpHNCMqKVIkISM9JCIyJzM9NUwrI1xUJCEjPSQiMSkqKSopeTg+NFYkISM8JCIxJyl6blUjPXBXJCEjPCQiMW1nWVp0IkhZJCEjPCQiMWJURF9rIip5TSEjPCQiMk1DVXFiOlxcJCEjPSQiMkVMST1tOTReJCEjPSQiMUElPW13OHBfJCEjPCQiMic0bFNyRyJIYSQhIz0kIjEqZiU+dz4iKmVOISM8JCIyKHpFKTQzNlxkJCEjPSQiMW8yeCY9NTRmJCEjPCQiMm0mKWUwSDRwZyQhIz0kIjFYcE0mUjNIaSQhIzwkIjFNXTgrdiEqUU8hIzwkIjJON0JcZzFcbCQhIz0kIjE3N3I0ZCE0biQhIzwkIjEjSCpcOVshcG8kISM8JCIxIlEoRz5SIUhxJCEjPCQiMXBhMkNJISo9UCEjPCQiMiVlTicpR0AhXHQkISM9JCIyd2teT0IsNHYkISM9JCIxUChSJVEuIXB3JCEjPCQiMUR5QVYlKipHeSQhIzwkIjE5ZixbJikqKSl6JCEjPCQiMSUqUiFHbCgqWyJRISM8JCIxJDMjZmRuKjMkUSEjPCQiMXIsUWllKm8lUSEjPCQiMEVvcidcKkcnUSEjOyQiMVxqJj4yJSopeVEhIzwkIjImUVd1d0oqWypRISM9JCIxR0RgIkcjKjMiUiEjPCQiMTIxSydRIipvI1IhIzwkIjEncDM2XCEqRyVSISM8JCIxJnknKmVmKikpZVIhIzwkIjF0W28rKCkpWyhSISM8JCIyRCdIWjB5KTMqUiEjPSQiMV41RTVwKW8rJSEjPCQiMiZSIlxdLCcpRy0lISM9JCIwQVApPl4pKVFTISM7JCIxNGBpQ1UpWzAlISM8JCIxKVI4JUhMKTMyJSEjPCQiMm1bLFVWIylvMyUhIz0kIjF2JiopKlE6KUc1JSEjPCQiMWt3eFYxKSk9VCEjPCQiMWBkY1soels4JSEjPCQiMk8kUU5gKXkzOiUhIz0kIjFBPjlleihvOyUhIzwkIjAsSUgxeEc9JSEjOyQiLyI9eDt3KSk+JSEjOiQiMSk9MURGdltAJSEjPCQiMXhVSHhWKDNCJSEjPCQiMW5CMyNbdG9DJSEjPCQiMmJXcW9lc0dFJSEjPSQiMU0mZTtwcil5VSEjPCQiMUNtVyd6cVtIJSEjPCQiMTdaQiwqcDNKJSEjPCQiMjshRy0xIXBvSyUhIz0kIjAqMyIzNm9HTSUhIzskIjIneSopZjpzJyllViEjPSQiMiVmcVE/aidbUCUhIz0kIjFaXjxEYSczUiUhIzwkIjFQSycqSFgnb1MlISM8JCIyY0teWmpqR1UlISM9JCIxOiVSJlJGJylRVyEjPCQiMkVdRlYlPSdbWCUhIz0kIjEjZjoiXDQnM1olISM8JCIwby5SMGdvWyUhIzskIjFoPHBlImZHXSUhIzwkIjFcKXpNRWUpPVghIzwkIjFSekVvdCZbYCUhIzwkIjFGZzB0ayYzYiUhIzwkIjE7VCV5ZGJvYyUhIzwkIjEwQWojb2FHZSUhIzwkIjJOSD91eWApKWYlISM9JCIxdCQzQSpHJltoJSEjPCQiMWprKnAqPiYzaiUhIzwkIjFfWHksNiZvayUhIzwkIjIxa3NsP11HbSUhIz0kIjFIMk82JFwpeVkhIzwkIjJ3IilbaFRbW3AlISM9JCIydiFwJDRfWjNyJSEjPSQiMSgpXHNEbSVvcyUhIzwkIjF3SV5JZCVHdSUhIzwkIjJZOyxgJFslKWVaISM9JCIxYSMqM1NSJVt4JSEjPCQiMVV0KFsvVjN6JSEjPCQiMUphbVxAJW8hWyEjPCQiMF9gV0RURyNbISM7JCIyJipmVCNmLiUpUVshIz0kIjEqb0hTWVJbJlshIzwkIjF5eCIpbyZRMyhbISM8JCIyaydlZ3R3JG8pWyEjPSQiMWJSUnluJEchXCEjPCQiMVc/PSQpZSQpPVwhIzwkIjFMLCh6KVwkWyRcISM8JCIxOCNlRjRNMyZcISM8JCIxLWphKD5MbydcISM8JCIxIlJNQklLRylcISM8JCIyJ3pDNzI5JCkpKlwhIz0kIjFvMCI+XklbLCYhIzwkIjJtbClwOydIMy4mISM9JCIxWW5bQChHby8mISM8JCIxRVtGRXkjRzEmISM8JCIxOkgxSnAjKXldISM8JCIyTyteZS5FWzQmISM9JCIxJDRSMTlEMzYmISM8JCIxIj1GYUNDbzcmISM8JCIwRjotTkJHOSYhIzskIjFmTCtiQyMpZV4hIzwkIjImUTl6ZjojWzwmISM9JCIxRiZ6WG0/Mz4mISM8JCIxO3dPcCg+bz8mISM8JCIxMGQ6dSk9R0EmISM8JCIxJXpWKnl6IilRXyEjPCQiMSUpPXQkMzxbRCYhIzwkIjFzKj4mKT07M0YmISM8JCIyQzAzTEg6b0cmISM9JCIxVGg0KVI5R0kmISM8JCIwQiUpR104KT1gISM7JCIyJz1CbjJFIltMJiEjPSQiMTIvWTc8IjNOJiEjPCQiMmNcW3MiMyJvTyYhIz0kIjEmZU8/Iyo0R1EmISM8JCIxdVkjby00KSlSJiEjPCQiMk52Nzs4M1tUJiEjPSQiMVUzU09zITNWJiEjPCQiMUoqKT1UaiFvVyYhIzwkIjInPnEoZlcwR1kmISM9JCIyJjRed11YISl5YSEjPSQiMSo+YGJsLltcJiEjPCQiMShHVC53LTNeJiEjPCQiMW4kSF4nPSFvXyYhIzwkIjFjdSIqcDQhR2EmISM8JCIyV2EwWjIrKWViISM9JCIyT2okXHoiKnp1YiEjPSQiMUE8RyVHKXohZiYhIzwkIjIxIilwISpRKHoxYyEjPSQiMSoqeSZRXCd6QWMhIzwkIjIxKWZrKWYmelFjISM9JCIxcFNWLlp6YWMhIzwkIjFkQEEzUXpxYyEjPCQiMmFDNUkiSHonbyYhIz0kIjFOJCl6PD96LWQhIzwkIjJYVSdlQTZ6PWQhIz0kIjE4WFBGLXpNZCEjPCQiMkRmaUBMKnldZCEjPSQiMSNvXXBWKXltZCEjPCQiMXIoUTxhKHkjeSYhIzwkIjIlZm9fWW15KXomISM9JCIxXFxKXmR5OWUhIzwkIjFQSTVjW3lJZSEjPCQiMmI3IiozJ1J5WWUhIz0kIjEwI3pjMSR5aWUhIzwkIjJOSG4vPCN5eWUhIz0kIjElUWJfRiJ5JSplISM8JCIyRVpWK1EheTVmISM9JCIyL2NKW1t6biNmISM9JCIwbD4nKmV5RiVmISM7JCIxUnhTJXB4KGVmISM8JCIydyJlPip6d1ooZiEjPSQiMnUhUilSIWZ4ISpmISM9JCIybSo+eDNdeDFnISM9JCIxJjNnTjZ1Ri0nISM8JCIyTzxbJD1LeFFnISM9JCIxa2k4QkJ4YWchIzwkIjFgViN6VXIyMichIzwkIjIwVzdGYHFuMychIz0kIjBfK3ZqcEY1JyEjOyQiMiYzJylHVShvKD1oISM9JCIxKXB3cSV5d01oISM8JCIxJ3lrPSZwd11oISM8JCIxd0dsY2d3bWghIzwkIjFsNFdoXncjPSchIzwkIjFhIUhpRWsoKT4nISM8JCIxTHIsckx3OWkhIzwkIjJDQTBlWmkyQichIz0kIjI7SiRmIWVobkMnISM9JCIxLDlRJm9nRkUnISM8JCIxKltwLHpmKHlpISM8JCIxd3YmXCopZVpIJyEjPCQiMW5jdSoqenY1aiEjPCQiMVlQYC9ydkVqISM8JCIxTz1LNGl2VWohIzwkIjFCKjRUSmIoZWohIzwkIjE4ISkqKT1XdnVqISM8JCIxLWhvQk52IVInISM8JCIwPnUlR0V2MWshIzskIjF6QUVMPHZBayEjPCQiME9dIVEzdlFrISM7JCIxWiVRRyUqXFpYJyEjPCQiMVFsaVohXDJaJyEjPCQiMUZZVF8iW25bJyEjPCQiMTpGP2RzdS1sISM8JCIxLzMqPk9ZKD1sISM8JCIxIyopeW5ZWFpgJyEjPCQiMXVwY3JYdV1sISM8JCIxaV1Od091bWwhIzwkIjA6VjZ5VUZlJyEjOyQiMVI3JGYpPXUpZichIzwkIjFHJD4yKjR1OW0hIzwkIjE7dV0mNFMyaichIzwkIjEwYkgrI1JuaychIzwkIjEmZSQzMCRRRm0nISM8JCIxdjsoKTR1dHltISM8JCIxaihmWV5PWnAnISM8JCIxX3lXPmN0NW4hIzwkIjFVZkJDWnRFbiEjPCQiMUpTLUhRdFVuISM8JCIxPkAiUSRIdGVuISM8JCIxKT4rJ1E/dHVuISM8JCIxKkcpUVY2dCF6JyEjPCQiMXdqPFstdDFvISM8JCIxa1cnSE5IRiNvISM8JCIxYER2ZCVHKFFvISM8JCIxVzFhaXZzYW8hIzwkIjFLKEd0bUUyKG8hIzwkIjE2bzZzZHMnKW8hIzwkIjEqKlshcChbcy1wISM8JCIxKSlIcCIpUnM9cCEjPCQiMXo1WyczQlokcCEjPCQiMW4icDc+QTImcCEjPCQiMWRzMCdIQG4ncCEjPCQiMVlgJTNTP0YpcCEjPCQiMUxNajAmPigpKnAhIzwkIjE5OlU1Jz1aLCghIzwkIjEsJzRfcjwyLighIzwkIjBwKCoqPm9yWXEhIzskIjB5JnlDZnJpcSEjOyQiMW9RZEhdcnlxISM8JCIxZD5PTVRyJTQoISM8JCIxWSs6UktyNXIhIzwkIjFGIlFSTTduNyghIzwkIjE6aXNbOXJVciEjPCQiMS9WXmAwcmVyISM8JCIxJFItJGUnNFo8KCEjPCQiMSNbITRqKDMyPighIzwkIjBkeXkneXExcyEjOyQiMWZtbXNwcUFzISM8JCIwdWF1MjEoUXMhIzskIjFHR0MjPTBaRCghIzwkIjE8NC4oRy8yRighIzwkIjExIT49Ui5uRyghIzwkIjElNDJtXC1GSSghIzwkIjEkPSZSLDtxPXQhIzwkIjF0Sz0xMnFNdCEjPCQiMWA4KDQiKSpwXXQhIzwkIjFUJWZkIiopcG10ISM8JCIwYFowLSlwI1EoISM7JCIwaU5gNyhwKVIoISM7JCIxMlA3SWlwOXUhIzwkIjEoejZcTCZwSXUhIzwkIjEnKSkqcFJXcFl1ISM8JCIxbHpbV05waXUhIzwkIjFjZ0ZcRXB5dSEjPCQiMVdUMWE8cCVcKCEjPCQiMUpBJillM3A1diEjPCQiMUEua2oqKm9FdiEjPCQiMFRHJW8hKm9VdiEjOyQiMSlcO0s8KW9ldiEjPCQiMXhYK3lzb3V2ISM8JCIxb0V6I1EnbyFmKCEjPCQiMWIyZShbJm8xdyEjPCQiMVgpb0JmJW9BdyEjPCQiMU1wOihwJG9RdyEjPCQiMUJdJT4hR29hdyEjPCQiMTdKdDE+b3F3ISM8JCIvN182NW8nbyghIzokIjEiRzRqNiFvLXghIzwkIjFwdDRAI3onPXghIzwkIjFlYSllS3lZdCghIzwkIjFZTm5JdW5deCEjPCQiMU87WU5sbm14ISM8JCIxQyhcLWt2RXkoISM8JCIxN3kuWFpuKXooISM8JCIxJCplIylcUW45eSEjPCQiMSMpUmhhSG5JeSEjPCQiMXI/U2Y/bll5ISM8JCIxZiw+azZuaXkhIzwkIjFbI3kqby1ueXkhIzwkIjFQand0JHBZKnkhIzwkIjFGV2J5JW8xInohIzwkIjEyRE0kZW5tI3ohIzwkIjEmZkkiKW9tRSV6ISM8JCIxJW89SHpsJ2V6ISM8JCIxdW5xKCpbbXV6ISM8JCIxaFtcLVNtISp6ISM8JCIwJkhHMkptMSEpISM7JCIwL3I/QGlFLSkhIzskIjE+ImZvSmgnUSEpISM8JCIxM3NrQC9tYSEpISM8JCIxKUhOa19mMTIpISM8JCIxJlFCN2plbTMpISM8JCIxdjksT3hsLSIpISM8JCIxayYqelNvbD0iKSEjPCQiMWB3ZVhmbE0iKSEjPCQiMUtkUF1dbF0iKSEjPCQiMUFRO2JUbG0iKSEjPCQiMTY+JipmS2wjPSkhIzwkIi11a0JsKT4pISM4JCIxKTNHJnA5bDkjKSEjPCQiMXhoSnUwbEkjKSEjPCQiMW1VNXonXG1DKSEjPCQiMVlCKlF5W0VFKSEjPCQiMUwvbykpeWt5IykhIzwkIjFCJm9NKnBrJUgpISM8JCIxN21EKTRZMUopISM8JCIvWi8uX2tFJCkhIzokIjEqeUt5SVdFTSkhIzwkIjF5M2k3TWtlJCkhIzwkIjFmKjN1XlVZUCkhIzwkIjFbcT5BO2shUikhIzwkIjFQXilwc1NtUykhIzwkIjFDS3hKKVJFVSkhIzwkIjE5OGNPKlEnUSUpISM8JCIxLiVcOC9RWVgpISM8JCIwXFBoOVAxWikhIzskIjFyYiM0RE9tWykhIzwkIjBtOGROTkVdKSEjOyQiMVw8XWdXaj0mKSEjPCQiMVApKkdsTmpNJikhIzwkIjFFejJxRWpdJikhIzwkIjE6ZydbeEptYykhIzwkIjEwVGx6M2ojZSkhIzwkIjElPlVXKSpIJylmKSEjPCQiMXQtQiozSFloKSEjPCQiMWkkPVM+RzFqKSEjPCQiMV9rISkpSEZtaykhIzwkIjFUWGYua2lpJykhIzwkIjBqI1EzYml5JykhIzskIjE9Mjw4WWklcCkhIzwkIjEyKWV6ckIxcikhIzwkIjEmKW91QUdpRSgpISM8JCIxeFxgRj5pVSgpISM8JCIxaklLSzVpZSgpISM8JCIxXjY2UCxpdSgpISM8JCIxViMqKj1DPjF6KSEjPCQiMEwob1kkPW0hKSkhIzskIjE+YVpedWhBKSkhIzwkIjEpXGppYjsnUSkpISM8JCIxKmVeNW06WSYpKSEjPCQiMW8nUmV3OTEoKSkhIzw3YGpsJCIwbisjPTdINCopISM8JCIxRW1PUCl6KnAhKiEjPSQiMSZlS2xYbzFCKiEjPSQiMGEpcHZxTiJSKiEjPCQiMFRrW3BYP2IqISM8JCIxbC4uOVZ0NygqISM9JCIwSyc+TEhVdCkqISM8JCIyeUFPXzo2TSsiISM9JCIyTiNHOjwrWz41ISM9JCIyIz4lcCF6KVtiLiIhIz0kIjJcLCcpNHU8OzAiISM9JCIyMGgtSGcnb241ISM9JCIydD4+W1liUDMiISM9JCIySHpObktDKSo0IiEjPSQiMiUpUV8nKT0kKmU2IiEjPSQiMlQpKm8wMGk+OCIhIz0kIjIqemJbNzQuWzYhIz0kIjJhPC1XeCo0azYhIz0kIjI2eD1qam8sPSIhIz0kIjFlYEIpXFBpPiIhIzwkIjJNJj46Z2pJNzchIz0kIjIiXCZvP0F2JEc3ISM9JCIyWzkmKVIzV1dDIiEjPSQiMjB1LGYlSF5nNyEjPSQiMmZMPXkhPWV3NyEjPSQiMjskXHRwMWwjSCIhIz0kIjImPTpsSiY+KDM4ISM9JCIyVTZvTlIpeUM4ISM9JCIyKTRaW2JzJjNNIiEjPSQiMmJJLHU2RXBOIiEjPSQiMSx6SnpcKkhQIiEjPCQiMShcTTclUTEqUSIhIzwkIjJFNF5KcUteUyIhIz0kIjIkencxbDo/QDkhIz0kIjJcRiUpcFVxc1YiISM9JCIyMSgzISopR1JMWCIhIz0kIjJpWTwzOjMlcDkhIz0kIjFpU3Q3cVomWyIhIzwkIjJ5bF1ZKGVhLDohIz0kIjJMRG5sdDl3XiIhIz0kIjAlUVspZiRvTDohIzskIjJkVisvWV8oXDohIz0kIjI7LjxCS0BlYyIhIz0kIjJ0aUxVPSEqPWUiISM9JCIyRkFdaC9memYiISM9JCIxPW8xM3otOTshIzwkIjJRVCQpKnBuNEk7ISM9JCIyNysrPmpsaGsiISM9JCIybWY7UVxNQW0iISM9JCIxIz5MZE4uJHk7ISM8JCIyeHlcd0BzVnAiISM9JCIyTVFtJno1VzU8ISM9JCIxekhbVCo0bHMiISM8JCIxdiYqUi4peUR1IiEjPCQiMjo7O2BtWidlPCEjPSQiMnN2S3NfO1p4IiEjPSQiMkVOXCIqUSZ5IXoiISM9JCIyJFtmMV5VJm8hPSEjPSQiMVdEKUg2QkgjPSEjPCQiMilSIioqWyg+KipRPSEjPSQiMmJ0Om8kMzFiPSEjPSQiMkFLSygpcEg2KD0hIz0kIjE9KlsxYyk+KCk9ISM8JCIyT15sRFVuSyE+ISM9JCIxNEBbJUdPJD4+ISM8JCIyWnEpUlleU04+ISM9JCIyM0k6JDNTWl4+ISM9JCIxJyo9QnFHYW4+ISM8JCIyS1tbQHQ2Tyk+ISM9JCIyJ3ldMSVmIW8qKj4hIz0kIjJWbiIpZlhcZCwjISM9JCIwRikqeUo9PS4jISM7JCIyYSdbIil6cil5LyMhIz0kIjI6WUo8L2NSMSMhIz0kIjJzMFtPIVwtITMjISM9JCIxV1ljbFA0JzQjISM8JCIyJFI3W0ZFOzdAISM9JCIxTnlSKltKI0dAISM8JCIxSldKXi5JV0AhIzwkIjJrLUpLQHAuOyMhIz0kIjI9aVpeMlFrPCMhIz0kIjE9VTFQcF0jPiMhIzwkIjJLIjMpKil6diYzQSEjPSQiMi5TKCozbVdZQSMhIz0kIjJjKlIiR184MkMjISM9JCIyOWZJWlEjeWNBISM9JCIydT1abUNeR0YjISM9JCIyR3lqJjMsIyopRyMhIz0kIjIjeS5bcSopKVxJIyEjPSQiMlUocFJLeTBAQiEjPSQiMWhOSiVwRXJMIyEjPCQiMmo6SWliJj5gQiEjPSQiMV9uOT1XRXBCISM8JCIyeU1qK0dMYFEjISM9JCIyUSUqej45LTlTIyEjPSQiMiNSbCpRK3J1VCMhIz0kIjFOSiJlJylSTlYjISM8JCIyOHNIeHMzJ1xDISM9JCIydEpZJypleGNZIyEjPSQiMThIY15rdSJbIyEjPCQiMiUzJnpNSjp5XCMhIz0kIjEvaFJ2VClRXiMhIzwkIjImKnA3dC5gKkhEISM9JCIyY0hIIyoqPS1ZRCEjPSQiMkIpZTloMjRpRCEjPSQiMnhaaUlpZiJ5RCEjPSQiMlAyelxbR1VmIyEjPSQiMXBjKm9NKEg1RSEjPCQiMltFNykzaU9FRSEjPSQiMWgpRzIyTkNrIyEjPCQiMm1YWEUkUl1lRSEjPSQiMkwvaVh6c1huIyEjPSQiMiRRJ3lrbFQxcCMhIz0kIjJXQiZSPTByMUYhIz0kIjIwJD1KIVF6RnMjISM9JCIxRSVHQUNbKVFGISM8JCIxQF05L3IiXHYjISM8JCIxPDsxbWYpNHgjISM8JCIxLyN5eiNbMCh5IyEjPCQiMiQqeiUqKSpvQkohRyEjPSQiMSZSNj1iIz4+RyEjPCQiMi8qenM4OUVORyEjPSQiMmxlV2NGSTgmRyEjPSQiMkE9aHY4KlJuRyEjPSQiMnd4eCUqKnpZJClHISM9JCIyUFAlUmhvYCoqRyEjPSQiMCc0SkJkZzpIISM7JCIyZGJGX2V1OyRIISM9JCIxXlQ5Wk11WkghIzwkIjJzdWchNEIiUSdIISM9JCIyRE14NDwiKSl6SCEjPSQiMidRUipHLl1mKkghIz0kIjJPYDVbKik9PywkISM9JCIyOTdGbnYoM0dJISM9JCIyb3JWJz1tOldJISM9JCIyREpnMFtELTEkISM9JCIxM3BaVVZId0khIzwkIjEvTlIvS08jNCQhIzwkIjIkKjQ1ajFLJTNKISM9JCIyWnBFI0c0XUNKISM9JCIyOUdWLHpwMDkkISM9JCIydSgpZj9sUW06JCEjPSQiMXRrKFJeMkY8JCEjPCQiMW9JKmVQdygpPSQhIzwkIjFsJzR5QlhbPyQhIzwkIjInZmlzKjQ5NEEkISM9JCIxY0draEgpcEIkISM8JCIxVSVmTiM9MGBLISM8JCIxUWdaJm8/InBLISM8JCIyTmojUlomKj0mRyQhIz0kIjImSCM0JDQlZTdJJCEjPSQiMURlQXJzSzxMISM8JCIxQEM5TGhSTEwhIzwkIjJqLGZdKlxZXEwhIz0kIjJNZ3ZwJlFgbEwhIz0kIjEpPiMqKT1GZyJRJCEjPCQiMSZ6MzNlcndSJCEjPCQiMiYqUURGV1NQVCQhIz0kIjEnKT5rLyQ0KUhNISM8JCIyO2VlbDt5ZVckISM9JCIxeF5aR3ElPlkkISM8JCIxazxSISplLHlNISM8JCIyJWYkM0J2JTMlXCQhIz0kIjFiXEE5Tzo1TiEjPCQiMGJUaFpBaV8kISM7JCIxWSJlIVE4SFVOISM8JCIyO3V1Kio+ZyRlTiEjPSQiMVE4Kj0xSFdkJCEjPCQiMUR6IVEjelwhZiQhIzwkIjBfQ2R5bWxnJCEjOyQiMmI2VHdrTkVpJCEjPSQiMjpyZCY0WHFRTyEjPSQiMTJWWnJMeGFPISM8JCIxLjRSTEElM24kISM8JCIxKlwyYDQ2cG8kISM8JCIyYTNDcyYqekhxJCEjPSQiMSJvUyI+KVshPlAhIzwkIjF3czAibzxedCQhIzwkIjI6KFEoSGEnPV5QISM9JCIyd1khKltTYnN3JCEjPSQiMWtxIW9FQ0x5JCEjPCQiMWZPc0dKUip6JCEjPCQiMWItayEqPlk6USEjPCQiMVVvYl8zYEpRISM8JCIydlZ0V3IqZlpRISM9JCIxTCtSdyZvTydRISM8JCIxR21JUXV0elEhIzwkIjJPQUItSTFlKlEhIz0kIjAjKVJAO3Y9IlIhIzskIjJsVGNTLVd6I1IhIz0kIjEuSShmKUcsV1IhIzwkIjJ2ZiopeXUiM2dSISM9JCIyTz4xKTQxOndSISM9JCIxKnlBPFo+QSpSISM8JCIxJVFST0wpRzNTISM8JCIxIilmYiY+ZFYtJSEjPCQiMmtkc3UwRS8vJSEjPSQiMWoiKlE+XFxjUyEjPCQiMidmZEkieWpEMiUhIz0kIjFiQkFWRWopMyUhIzwkIjAmKlFeXSxaNSUhIzskIjFZYjBuLng/VCEjPCQiMVRAKCpHI1JvOCUhIzwkIjJrdCkpMzQzSDolISM9JCIyTkswRyZwKCpvVCEjPSQiMiY+PnM5ZS8mPSUhIz0kIjJjXlFtbjk2PyUhIz0kIjE2XmJRTj08VSEjPCQiMTE8WitDRExVISM8JCIxLSQpUWk3S1xVISM8JCIyJikqW0lDLFJsVSEjPSQiMSZbQGkpKmU5RyUhIzwkIjAzUSJbeV8oSCUhIzskIjJjbmErcidmOFYhIz0kIjFyNyg+ZGwnSFYhIzwkIjFveSlRVk1kTSUhIzwkIjFqVyFlSC49TyUhIzwkIjIlZTVzZEAoeVAlISM9JCIxWHdqPjUlUlIlISM8JCIxVFViIikpNCtUJSEjPCQiMnckM1pWKHlnVSUhIz0kIjFMdVEwdzlVVyEjPCQiMiVHU0lua0BlVyEjPSQiMUMxQUhgR3VXISM8JCIxPnM4Ij5hLlwlISM8JCIyWCJRMGBJVTFYISM9JCIyOlNxXCI+XEFYISM9JCIxKCpwKW94ZyZRWCEjPCQiMSRmLilRJ0hZYiUhIzwkIjIlKT0/Ml0pcHFYISM9JCIxJXlPRU9ubmUlISM8JCIyMFFgWEFPR2clISM9JCIxdypwazMwKj1ZISM8JCIxaWxRW1IoXGolISM8JCIxZUpJNUcvXlkhIzwkIjJPdj5BbjZybSUhIz0kIjFcajhNMD0kbyUhIzwkIjFZSDAnUlwjKnAlISM8JCIxVCZwekQ9YHIlISM8JCIybDgnKSk+clFKWiEjPSQiMUJGIT0pZlhaWiEjPCQiMT4kPlAlW19qWiEjPCQiMTlmajBQZnpaISM8JCIyL15fdmNpY3olISM9JCIxMCJwJUg5dDZbISM8JCIxLWRRIkgreSNbISM8JCIxKUgtTDpwUSVbISM8JCIxJSkpPV8sUSpmWyEjPCQiMid6YTh4byt3WyEjPSQiMXY/MFJkMiMqWyEjPCQiMi9ubzRnVyIzXCEjPSQiMmtFJilHWThVI1whIz0kIjFpPSFbSyNHU1whIzwkIjFkJT1uPV5qJlwhIzwkIjFXXWpbK1VzXCEjPCQiMGteMCIqKVspKVwhIzskIjJrQm9DeGRYKyYhIz0kIjFLW1FNbWk/XSEjPCQiMUY5SSdcJnBPXSEjPCQiMkQtPSNlVndfXSEjPSQiMT5ZOD9LJClvXSEjPCQiMmM/Xj8zLVwzJiEjPSQiMSx5J1IlNCg0NSYhIzwkIjEnUiUpZSEpUnE2JiEjPCQiMkMqNCF5bTNKOCYhIz0kIjEpZTwoSHY8XF4hIzwkIjEkPU07UllfOyYhIzwkIjB5XU5EOjg9JiEjOyQiMW10WTpUUSg+JiEjPCQiMjsnUlF4SFg4XyEjPSQiMWUwSVI9X0hfISM8JCIxYHJALDJmWF8hIzwkIjIlW1A4aiZmO0UmISM9JCIxWC4wRCVHeEYmISM8JCIyMSVwJ3BHKHokSCYhIz0kIjFGTikpW2gnKTRgISM8JCIxQSwhMyxOZksmISM8JCIxPm5yc1ErVWAhIzwkIjJXSkxZdHMhZWAhIz0kIjAiKlxsZlRUUCYhIzskIjEwbFllL0AhUiYhIzwkIjIxNSRRPyR6aVMmISM9JCIybXAqSCM9W0JVJiEjPSQiMSRHO1UvPCVRYSEjPCQiMXlHODFmW2FhISM8JCIxdSVcIW9aYnFhISM8JCIxcGcnKkhPaSdbJiEjPCQiMW1FKT1cI3AtYiEjPCQiMWgjKnpgOHc9YiEjPCQiMm0mZXI6LSRbYCYhIz0kIjJPV0t3MioqM2ImISM9JCIxUiFcJlJ6J3BjJiEjPCQiMldqbDkhby4kZSYhIz0kIjFKQVFqYzUqZiYhIzwkIjJsIykpSERYPDpjISM9JCIxQWFAKFFWN2omISM8JCIxPD84XEFKWmMhIzwkIjExJ1s1NiJRamMhIzwkIi9fJ0goKlwlemMhIzokIjEmeiIpWyQpPWJwJiEjPCQiMi9SKXoncChlNmQhIz0kIjEpKVxyZWxsRmQhIzwkIjJFZUoxVURQdSYhIz0kIjF5IltERyV6ZmQhIzwkIjFrWllXSidleCYhIzwkIjFpOFExPyQ+eiYhIzwkIjFkekhvMyszZSEjPCQiMkRiOS10cFMjZSEjPSQiMVw2OCNmUSwlZSEjPCQiMll1WlNYMmkmZSEjPSQiME1rZkp3QShlISM7JCIxRTQpeTxYJCkpZSEjPCQiMUF2elJTVC9mISM8JCIxPVRyLEhbP2YhIzwkIjE4MmpqPGJPZiEjPCQiMiYzdGFEMWlfZiEjPSQiMTBSWShbKm9vZiEjPCQiMSwwUVwkZVopZiEjPCQiMSgzKEg2cyMzKychIzwkIjJDbzhLMicqbywnISM9JCIyJnktOE5cJ0guJyEjPSQiMXVvLyh6TCFcZyEjPCQiMXBNJyplRTVsZyEjPCQiMW0rKTNfcjYzJyEjPCQiMWhteiNRU3M0JyEjPCQiMWJLclcjNEw2JyEjPCQiMVYpSG01eSRIaCEjPCQiMiVRa2FvcFdYaCEjPSQiMlguai8kZV5oaCEjPSQiMGp6QnAlZXhoISM7JCIxRGlIYU5sJD4nISM8JCIxQUdAO0NzNGkhIzwkIjJ1VEgieTd6RGkhIz0kIjEvZy9TLCc9QychIzwkIjEqZmk+K0h6RCchIzwkIjEmPnpRJ3kqUkYnISM8JCIxInomekRuMSFIJyEjPCQiMSdRN3hlTmhJJyEjPCQiMSMpKkcnXFc/QWohIzwkIjF5YmE2TEZRaiEjPCQiMWtAWXRATWFqISM8JCIxZih5YC42L1AnISM8JCIxYmBIKCopemtRJyEjPCQiMV4+QGYoW0RTJyEjPCQiMVomRzZpPCc9ayEjPCQiMVVeLyRbJ29NayEjPCQiMHVoXE1iMlgnISM7JCIxRSR5bz9Db1knISM8JCIwI1x6b0kqR1snISM7JCIxPDpyST4nKilcJyEjPCQiMTkiR0V6SV1eJyEjPCQiMTRaYWEnKjRKbCEjPCQiMTA4WTsmb3JhJyEjPCQiMSkqeVB5dEJqbCEjPCQiMShbJUhTaUl6bCEjPCQiMSMzNkE1dmBmJyEjPCQiMXl3N2tSVzZtISM8JCIxdFUvRUdeRm0hIzwkIjAoMyd6byJlVm0hIzskIjFsdSgpXDBsZm0hIzwkIjFoU3o2JT5kbichIzwkIjFaMXJ0Iyl5InAnISM8JCIxVnNpTnImeXEnISM8JCIxUVFhKCpmI1JzJyEjPCQiMU0vWWZbKipSbiEjPCQiMUhxUEBQMWNuISM8JCIxRE9IJGVLQHgnISM8JCIwQTVfVywjKXknISM7JCIxMm83Mi5GL28hIzwkIjEwTS9wIlIuI28hIzwkIjEqKipmNC4zayRvISM8JCIxJWZ3RypvWl9vISM8JCIwPiR6YWRhb28hIzskIjEneTRuaDlZKW8hIzwkIjEjUUUneU1vK3AhIzwkIjFvSGFTQnY7cCEjPCQiMWomZkM/QEckcCEjPCQiMDt3VjEhKilbcCEjOyQiMWJGSEUqZVwncCEjPCQiMV4kNCMpeUY1KXAhIzwkIjFaZjddbTQoKnAhIzwkIjFVRC83Yjs4cSEjPCQiMVEiZlJQTSNIcSEjPCQiMUNkKGVCLmAvKCEjPCQiMT5Ceig0czgxKCEjPCQiMTwqMyhmNFd4cSEjPCQiMTZiaUApNE40KCEjPCQiMTJAYSRveSY0ciEjPCQiMS4oZWFhWmM3KCEjPCQiMSlIdnRTOzw5KCEjPCQiMSUpPUhwX3lkciEjPCQiMFszNzhhUTwoISM7JCIxeV03JCpIIyoqPSghIzwkIjF0Oy9iPSpmPyghIzwkIjFuI2Vwcmc/QSghIzwkIjFqWygpeSZIIlFzISM8JCIxaDl6UyUpPmFzISM8JCIxWiEzRkluLUYoISM8JCIxVVlpa2hMJ0coISM8JCIxUDdhRV1TLXQhIzwkIjFNeVgpKVFaPXQhIzwkIjFIV1BdRmFNdCEjPCQiMUQ1SDc7aF10ISM8JCIwaTJVWiFvbXQhIzskIjEyVTdPJFxGUSghIzwkIjEuMy8pPj0pKVIoISM8JCIxKVJkKmZxKVtUKCEjPCQiMSUqUig9I2YmNFYoISM8JCIwZiF6JHlDcVcoISM7JCIxJz0yZGskNGp1ISM8JCIxInlCd11pInp1ISM8JCIxcC5hcDhCJlwoISM8JCIxanBYSi1JNnYhIzwkIjFmTlAkNHB0XyghIzwkIjFhLEhielZWdiEjPCQiMHYxcyJvXWZ2ISM7JCIxWEw3emNkdnYhIzwkIjFUKlI1YVc7ZighIzwkIjFIbCZIUzh4ZyghIzwkIjFESihbRSN5QnchIzwkIjE+KCp5RTYmKVJ3ISM8JCIxOWpxKSkqPmZsKCEjPCQiMTZIaV0pKSk+bighIzwkIjEyJlJEcmQhKW8oISM8JCIxLWhYdWw3L3ghIzwkIjEpcHNqViY+P3ghIzwkIjEmRypHKUhraXQoISM8JCIwKWU/Z0pMX3ghIzskIjF2QzdBP1NveCEjPCQiMXIhUlMpM1oleSghIzwkIjFuYyZmdVIwIXkhIzwkIjFrQSh5ZzNtInkhIzwkIjFlKSl5cHVuS3khIzwkIjFYYXFKanVbeSEjPCQiMC9BTz46Wyd5ISM7JCIxUCdRYjAlKTMpeSEjPCQiMUpfWDxIJnAqeSEjPCQiMCQ9UHo8LTh6ISM7JCIxRCUpR1QxNEh6ISM8JCIxQF0/LiZmXiV6ISM8JCIxMjs3bCRHNyd6ISM8JCIxLSNRcUEoSHh6ISM8JCIxKXphKikzbUwqeiEjPCQiMSRScjMmXFY0ISkhIzwkIjEqKXp5N1FdRCEpISM8JCIxJmUvWm5zOi8pISM8JCIwPUBtYFR3MCkhIzskIjFueGApUjVQMikhIzwkIjFqVlhnI3ooKjMpISM8JCIxZTRQQSJbZTUpISM8JCIxYXZHJSlwIj43KSEjPCQiMVxUP1llKXo4KSEjPCQiMVgyNzNaMGEiKSEjPCQiMVR0LnFON3EiKSEjPCQiMUhSJj5WIz4nPSkhIzwkIjFCMChRSGhBPykhIzwkIjA3KHliLEw9IykhIzskIjE6UHE8ISpSTSMpISM8JCIwSj8nenlZXSMpISM7JCIxMXBgVG5gbSMpISM8JCIxLE5YLmNnI0cpISM8JCIxKDNxYFl1JylIKSEjPCQiMSRvJ0dGTHU5JCkhIzwkIjF5Sz8qPTczTCkhIzwkIjF2KT42MCIpb00pISM8JCIxc2suOCpcSE8pISM8JCIxbUkmXHg9IXokKSEjPCQiMWkncG9qKDMmUikhIzwkIjFcaXkpXGM2VCkhIzwkIjFWR3FnYEFGJSkhIzwkIjBXPkVBJUhWJSkhIzskIjFNZ2AlM2okZiUpISM8JCIxTEVYWT5WdiUpISM8JCIxRyNwJDMzXSJcKSEjPCQiMUNlR3EncHZdKSEjPCQiMFQtQWBRT18pISM7JCIxMiE+VFIyKFImKSEjPCQiMS1jLmNpeGImKSEjPCQiMSY+X3o2WD1kKSEjPCQiMSR6byl6UiJ6ZSkhIzwkIjEqUSZ5VEcpUmcpISM8JCIxJSk+cS48MD8nKSEjPCQiMGU9Y2M/aGopISM7JCIxbl5gRiUqPV8nKSEjPCQiMWo8WCpHZSNvJykhIzwkIjFlJG84OkZWbykhIzwkIjFhXEc4Z1IrKCkhIzwkIjFcOj92W1k7KCkhIzwkIjFYIj1ydExEdCkhIzwkIjB1TSEqZi0nWygpISM7JCIxRTgmNFlyWXcpISM8JCIxQnonR0tTMnkpISM8JCIwXyV5JT00b3opISM7JCIxOTZxWSF5RyIpKSEjPCQiMHI8JzNwJSpHKSkhIzskIjEwVmBxZCxYKSkhIzwkIjEsNFhLWTNoKSkhIzwkIjEoW25WXGByKCkpISM8JCIxJDMlR2NCQSQqKSkhIzwkIjFyMT89N0g0KikhIzw3YGpsJCIwKGUmNEtKWyUqKSEjPCQiMUwielIlNDsxIiohIz0kIi9DK24wXG4jKiEjOyQiMWxjLSE+PylHJSohIz0kIjAlKVtJIilcLGYqISM8JCIxL0AyTyV6OXYqISM9JCIxcGA0ZiE0RyIqKiEjPSQiMk0nPUBvUVQyNSEjPSQiMioqPTkwJG9hQjUhIz0kIjJpXjtHenonUjUhIz0kIjFWKT1edjdlMCIhIzwkIjImcDZVPGQlPjIiISM9JCIyb1tCKHoneSEpMyIhIz0kIjJMImUtVTtALzYhIz0kIjIpUiJHVmdXLjciISM9JCIybFlJbWN4azgiISM9JCIxJHpLKkcwaF82ISM8JCIyJD5eQiJcVihvNiEjPSQiMVl1YGBrKFs9IiEjPCQiMkt3UmVUNDU/IiEjPSQiMDRVInlCOTw3ISM7JCIya1RXL012S0IiISM9JCIyRnVZRkkzJVw3ISM9JCIyJXAhXF1FVGJFIiEjPSQiMSdSXnRBdTtHIiEjPCQiMkNzYCcqPTJ5SCIhIz0kIjAvYz46U1JKIiEjOyQiMmpPZVU2dCtMIiEjPSQiMSRwZ2wyMWlNIiEjPCQiMiQ+SScpUSFSQk8iISM9JCIxWWA7LD9aeTghIzwkIjJCbm5NJ1xnJVIiISM9JCIyKSkqKnBkI3p0NTkhIz0kIjJqSnMhKSkzKG9VIiEjPSQiMVZZUF1RK1Y5ISM8JCIyI3BwbjdvOGY5ISM9JCIyZkh6XHhwX1oiISM9JCIyQ2kiR1BGUyJcIiEjPSQiMihbUmUqcE52XSIhIz0kIjJhRicpPW1vT18iISM9JCIyR2YpPUM7ISlSOiEjPSQiMiM+NFwnZU1mYiIhIz0kIjFZS3pbdjFzOiEjPCQiMkRkJjQ2MD8pZSIhIz0kIjEqKnlSdE1MLzshIzwkIjFELXFOa1k/OyEjPCQiMj1iLSEpUipmTzshIz0kIjIlcFtJZ0J0XzshIz0kIjEnPjJFS2wpbzshIzwkIjJDXzRcRykqXG8iISM9JCIyKFs9QFo3OCw8ISM9JCIxdlReNFVFPDwhIzwkIjI8XTs9PChSTDwhIz0kIjIlRyk9VDhJJlw8ISM9JCIxWTZVJzRqY3ciISM8JCIyQlpCKGVneiJ5IiEjPSQiMigpekQ1LUh6eiIhIz0kIjJgN0dMKT4xOT0hIz0kIjI7WEljJVw+ST0hIz0kIjIkeUYkeiF6S1k9ISM9JCIyWTVOLSgzWWk9ISM9JCIyQlVQRCRRZnk9ISM9JCIxXChSW3pFWio9ISM8JCIyXzJVcnZmMyI+ISM9JCIyO1NXJT5GKnAjPiEjPSQiMiNHbnUib0RKJT4hIz0kIjJYMFxTa2UjZj4hIz0kIjEiUV5qZyJSdj4hIzwkIjImKXBgJ29YXyIqPiEjPSQiMURnJjRgZHcrIyEjPCQiMjpOZUtcIXpCPyEjPSQiMXkxY2JNIypSPyEjPCQiMlgranlUY2cwIyEjPSQiMUpgOyFRKj1zPyEjPCQiMnZsbkNNQSQpMyMhIz0kIjF2KnBaSWJXNSMhIzwkIjI5SXNxRSllP0AhIz0kIjFHWVBIN3NPQCEjPCQiMlomcG4iPmFHOiMhIz0kIjEiR3pSOigpKm9AISM8JCIydWciRzssNyY9IyEjPSQiMU1SZXlJRCxBISM8JCIyL0UnKTMvJ1E8QSEjPSQiMXkmKT0uIT5OQiMhIzwkIjJWITRcbD5sXEEhIz0kIjFKS3pGXHlsQSEjPCQiMnRiJjQhKnkiPkcjISM9JCIxJSl5Ul8zMClIIyEjPCQiMi5AK1oiUT05QiEjPSQiMVBEK3huSklCISM8JCIyVSZbSVIoXGtNIyEjPSQiMSI9MjtxI2VpQiEjPCQiMnNdNFJtOih5QiEjPSQiMU09QEUnW1tSIyEjPCQiMWhUXillIik0VCMhIzwkIjEoWzszYjlyVSMhIzwkIjJOIik9Sl5aS1cjISM9JCIyNzhAYVohUWZDISM9JCIxZE1zUE1edkMhIzwkIjJReUQrU1k7XCMhIz0kIjE2IkdCT3p4XSMhIzwkIjJvVklZSzdSXyMhIz0kIjJRd0twR1grYSMhIz0kIjA0TiNcI3loYiMhIzskIjJ1U1A6QDZCZCMhIz0kIjJQdFJRPFclKWUjISM9JCIyMzFVaDh4WGcjISM9JCIxKFFXJSk0NTJpIyEjPCQiMk1yWTIxVm9qIyEjPSQiMi8vXEktd0hsIyEjPSQiMm5PXmApKjMicEUhIz0kIjElb2B3JT5DJm8jISM8JCIyLixjKjRcUCxGISM9JCIybUxlQSh5XTxGISM9JCIyUG1nWCQza0xGISM9JCIwKkgnb3p0KFxGISM7JCIyakpsImZuIWZ3IyEjPSQiMkVrbjlzUj95IyEjPSQiMjEnKnBQb3MiKXojISM9JCIxKEdzZ2swViJHISM8JCIyS2h1JDMnUS8kRyEjPSQiMidScG5xOmRZRyEjPSQiMm1FekhgL0YnRyEjPSQiMSRmIkcmXFApeUchIzwkIjIjPlJlZC8oXCpHISM9JCIyaUMnKSk+TTU2SCEjPSQiMk5jKT0jUU9zI0ghIz0kIjIwKjNcVyRwTCVIISM9JCIxO0t6MUJdZkghIzwkIjFWYjRwX2p2SCEjPCQiMiZweVJKI288KkghIz0kIjEnPitQPix6KyQhIzwkIjFBRCtjVC5DSSEjPCQiMCVbST1yO1NJISM7JCIyazsyMTMrajAkISM9JCIxJFw0SC9MQzIkISM8JCIxPj1AMGdjKTMkISM8JCIxWVRebiopcC9KISM8JCIyRlo7KUg+JDM3JCEjPSQiMiUqej1AKlsncDgkISM9JCIxOzZVYXk0YEohIzwkIjFWTXM7M0JwSiEjPCQiMXBkLXpQTyY9JCEjPCQiMSc0Rzh1J1wsSyEjPCQiMUEvai4oSHdAJCEjPCQiMVxGJGZtaVBCJCEjPCQiMmMyTiNHYyopXEshIz0kIjEkUlAwZkdnRSQhIzwkIjE+KFJHYmhARyQhIzwkIjFZPzk6WEgpSCQhIzwkIjJFUFd1WkZXSiQhIz0kIjEqcFkoUi9jSUwhIzwkIjFEIVw/UyRwWUwhIzwkIjJFTl5WT0VHTyQhIz0kIjImcE9sRSRmKnlMISM9JCIxJypmJiopRyM0JlIkISM8JCIxQSRlN0REN1QkISM8JCIxWzFjOCNldFUkISM8JCIyYihIJ2U8IlxWTSEjPSQiMS1gO1FUaWZNISM8JCIydWluLzVkZFokISM9JCIxWSpwRjEhKj1cJCEjPCQiMkNGc10tQiEzTiEjPSQiMSpmdXQpZjpDTiEjPCQiMURwblwqKUdTTiEjPCQiMkNEej4iPlVjTiEjPSQiMXk6R3VbYnNOISM8JCIxMFJlT3lvKWUkISM8JCIxQWkpKSl6P1tnJCEjPCQiMiVcJik9aFAmNGkkISM9JCIyWSgzXEJuM1BPISM9JCIxLUt6Jm8+S2wkISM8JCIxR2I0W0VOcE8hIzwkIjJZJnlSNWNbJm8kISM9JCIxIz0rRmQ9O3EkISM8JCIxKlwtXWBeeHIkISM8JCIxRFtJKFwlKVF0JCEjPCQiMV9yZ2Z1LF1QISM8JCIydlo0PlVdaHckISM9JCIxMD1AJVEkRyN5JCEjPCQiMjs4OWxNOyUpeiQhIz0kIjFlayIpMyRcWCJRISM8JCIxJXk9NkYjb0lRISM8JCIxLTZVTF8ibyVRISM8JCIxR01zJj5bSCdRISM8JCIyWHZEIWU2M3pRISM9JCIxIzNHLjc5XypRISM8JCIxMy9qIzNaOCJSISM8JCIxTUYkXC8hW0ZSISM8JCIxaF1CMkloVlIhIzwkIjF5dGBwZnVmUiEjPCQiMTAoUj0kKnllKFIhIzwkIjI5LlVUKj0sIypSISM9JCIydU5XayZbOTNTISM9JCIxJW9ZKD15RkNTISM8JCIxNiFcNXk1Ly8lISM8JCIydUxeTHVWbDAlISM9JCIxYU9sMG5uc1MhIzwkIjEjKWYmem00KSkzJSEjPCQiMTMkZS1qVVw1JSEjPCQiMk9qZ0RmdjU3JSEjPSQiMWhIJ1tiM3M4JSEjPCQiMSdHbHJeVEw6JSEjPCQiMk9obiV6V1pwVCEjPSQiMUoqcDxXMmM9JSEjPCQiMWRBMi8vdSxVISM8JCIxJWV1ak90eUAlISM8JCIyMSJwbkdqK01VISM9JCIybEJ6NEhSLEQlISM9JCIxajpHYEFGbVUhIzwkIjIxKlFlOl9TI0clISM9JCIydj8nKXk8USYpSCUhIz0kIjFNJik9UzZuOVYhIzwkIjFoM1wtVCEzTCUhIzwkIjEnPSR6a3EkcE0lISM8JCIyTl4mNEYrMmpWISM9JCIxVHlSKilIP3pWISM8JCIxbSxxXmZMJlIlISM8JCIxJVstUyIqbzlUJSEjPCQiMTZbSXc9Z0ZXISM8JCIxUHJnUVt0VlchIzwkIjFqJTQ0IXknKWZXISM8JCIxIno2S3crZ1olISM8JCIyazY5YnNMQFwlISM9JCIxVmsieW9tIzNYISM8JCIxcCg9LGwqUkNYISM8JCIydTNAQ2hLMGElISM9JCIxOE1zdWJtY1ghIzwkIjFUZC1QJil6c1ghIzwkIjFtIUckKlxKKillJSEjPCQiMSRSSTtZa11nJSEjPCQiMT5GJFJVKD5AWSEjPCQiMVldQidRSXRqJSEjPCQiMWp0YFtMWWBZISM8JCIyJypvUjNKJ2ZwWSEjPSQiMTw/OXQjSGRvJSEjPCQiMVZWV05BJz1xJSEjPCQiMXBtdSg+Jip6ciUhIzwkIjJiKipbKztHVHQlISM9JCIxQThOQTZFXVohIzwkIjBrYFkzJVJtWiEjOyQiMmwnZiZwL0ZEeSUhIz0kIjEkSGUjNCttKXolISM8JCIxPjFjckh6OVshIzwkIjFZSCdRJGYjNCRbISM8JCIyREZsaCopZXElWyEjPSQiMSpmbiVlPT5qWyEjPCQiMTwqcDIjW0t6WyEjPCQiMk1Dc0l5ZGEqWyEjPSQiMXBYUFgyZjZcISM8JCIyYSpvbjJQc0ZcISM9JCIxQiN6KnBtJlElXCEjPCQiMVw6R0snKikqZlwhIzwkIjF2UWUlZkFoKFwhIzwkIjEkPicpb2JiQSpcISM8JCIxPiYpPT4mKVEzXSEjPCQiMmolM1wiW0BYLSYhIz0kIjFzSnpWV2xTXSEjPCQiMSpcJjQxdXljXSEjPCQiMUN5Um8uI0gyJiEjPCQiMV8scUlMMCozJiEjPCQiMXBDKyRIJz0wXiEjPCQiMSd6L2BEPjg3JiEjPCQiMUFyZzxBWFBeISM8JCIyJ1slNCp6XmVgXiEjPSQiMlh4NkE5PShwXiEjPSQiMS1UXi82JmU9JiEjPCQiMidHayJvMSUpPj8mISM9JCIxWSg9IkhxNj1fISM8JCIxczVVIioqXFVCJiEjPCQiMSpSQlAmSFFdXyEjPCQiMURkLTtmXm1fISM8JCIxXyFHJHkpW0VHJiEjPCQiMXoualM9eSlIJiEjPCQiMS9GJEghWyJcSiYhIzwkIjJDLU5fd1o1TCYhIz0kIjFcdGBGMj1aYCEjPCQiMmxuUikqbzhMTyYhIz0kIjEtPzlfbVd6YCEjPCQiMUdWVzknemJSJiEjPCQiMldsWW5kNzxUJiEjPSQiMSMpKlshUmIleVUmISM8JCIxMzhOLCZ5UlcmISM8JCIxRE9sajk2Z2EhIzwkIjFfZiZmVVdpWiYhIzwkIjF5I2UjKVF4QlwmISM8JCIyWWdnME41JjNiISM9JCIxS0gnR0pWWV8mISM8JCIxZV87dml4U2IhIzwkIjJZZW51QjRwYiYhIz0kIjI7ISpwKCo+VUlkJiEjPSQiMUdBMmlePCplJiEjPCQiMWJYUEMiM2BnJiEjPCQiMSMpb24nM1Q5aSYhIzwkIjJ3P3oqW1NkUGMhIz0kIjJOYCJHNnFxYGMhIz0kIjAnUWV0KlIpcGMhIzskIjImeWgpZSRIKGZvJiEjPSQiMlhdKT0pKmU1LWQhIz0kIjFKM1xnKVEjPWQhIzwkIjJrOiR6QT1QTWQhIz0kIjEmWyY0JnkvMHYmISM8JCIxNnlSWnhqbWQhIzwkIjJrOCsoNDJ4I3kmISM9JCIxYUMrc08hKil6JiEjPCQiMjl5L1ZqT10iZSEjPSQiMnU1Mm1mcDYkZSEjPSQiMU0lNCplRElaZSEjPCQiMjl3NjdfTk0nZSEjPSQiMSkzOU5bbyZ6ZSEjPCQiMk1UO2VXLGQqZSEjPSQiMHQ9IjNXJD0iZiEjOyQiMWQ1VXF0J3ojZiEjPCQiMSVRQkZMK1QlZiEjPCQiMHJEXUhMLSdmISM7JCIxUCFHdERtaihmISM8JCIxay5qPiMqXCMqZiEjPCQiMicqb0s+PUsnM2chIz0kIjEzXUJXXndDZyEjPCQiMUx0YDEiKSozLychIzwkIjIxbVIpbzUuZGchIz0kIjEoKT45SlM7dGchIzwkIjE4VlckKnBIKjMnISM8JCIxVG11YipIYTUnISM8JCIxbipbIT1IY0BoISM8JCIxJUheLillcFBoISM8JCIwaGBFJSlHUTonISM7JCIxT2YmXCE9JypwaCEjPCQiMWwjZXN3JTQnPSchIzwkIjBmZyZIeEEtaSEjOyQiMTtIJz1wZyQ9aSEjPCQiMVdfO2FPXE1pISM8JCIwZG5raEUxRCchIzskIjEoKSlwKHkmZm5FJyEjPCQiMTlBMlREKkdHJyEjPCQiMGF1TF1EISpIJyEjOyQiMW1vbmwlZV5KJyEjPCQiMSM+enpVIkhKaiEjPCQiMF8iRyFSQ3VNJyEjOyQiMVpRZV90YmpqISM8JCIxamgpW0ohcHpqISM8JCIwXCk9eEsjZVInISM7JCIxOjNcUmkmPlQnISM8JCIxVkp6LCMqM0drISM8JCIwWiY0a0BBV2shIzskIjEneihSRV5OZ2shIzwkIjFBLHEpMylbd2shIzwkIjFUQyteNWkjXCchIzwkIjFuWkk4U3YzbCEjPCQiMSQ0MmMocClbXychIzwkIjBVNHokKj41YSchIzskIjFZPEArSDpkbCEjPCQiMXNTXmllR3RsISM8JCIxKVI7WyMpPSUqZSchIzwkIjE8KD1yeV5iZychIzwkIjFVNVVcWm9AbSEjPCQiMXBMczZ4InlqJyEjPCQiMSZwRFNuXVJsJyEjPCQiMUEhR2pqJDNxbSEjPCQiMVsuailmO2lvJyEjPCQiMXdFJDRjXEJxJyEjPCQiMSMqXEJCRFs9biEjPCQiMEtQYls6WXQnISM7JCIxWidSeVdbMnYnISM8JCIxdD45NTkpb3cnISM8JCIxKkhXQ1A5SXknISM8JCIxRW11TXQ5KnonISM8JCIxXypbcUghRzpvISM8JCIwRl4kZktUSm8hIzskIjEoZmA7QVl2JW8hIzwkIjFCZiZSPXpPJ28hIzwkIjFbI2VpOTcpem8hIzwkIjF2MGMzXiVmKm8hIzwkIjEtSCczMnk/InAhIzwkIjFHXztMNUBHcCEjPCQiMVl2WSYqUk1XcCEjPCQiMXMpcHgmcFpncCEjPCQiMSo+cysjKjRtKHAhIzwkIjFEWFAjKUd1IypwISM8JCIxYG9uV2UoKTNxISM8JCIxeiJ6cCEpM10tKCEjPCQiMTA6R3A8OVRxISM8JCIxS1FlSlpGZHEhIzwkIjFbaClRcDJNMighIzwkIjF3JSk9YzFhKjMoISM8JCIxLjNcPU9uMHIhIzwkIjFISnohZTE9NyghIzwkIjFgYTRWJlJ6OCghIzwkIjEieShSMEQyYXIhIzwkIjEzLHFuYT9xciEjPCQiMUVDK0klUWo9KCEjPCQiMV9aSSNSckM/KCEjPCQiMXpxZ2FWZz1zISM8JCIxMCU0cEpQWkIoISM8JCIxSjxAei0oM0QoISM8JCIxZFNeVEsrbnMhIzwkIjElUTtRP09KRyghIzwkIjEtKD1oO3AjKkgoISM8JCIxRzVVR0BTOnQhIzwkIjFhTHMhNE46TCghIzwkIjEib0RJMG93TSghIzwkIjE0IUdgLCxRTyghIzwkIjFOLmp4UiQqenQhIzwkIjBtSypScDEnUighIzskIjApXEItKio+N3UhIzskIjExdGBrR0xHdSEjPCQiMGpSbyNlWVd1ISM7JCIxZj45KnkpZmd1ISM8JCIxJkdXOXZKblooISM8JCIwaFlQcmtHXCghIzskIjFQKltnbigqKjN2ISM8JCIxYjdOUTE4RHYhIzwkIjBlYDFnajdhKCEjOyQiMTNmJkhjJ1JkdiEjPCQiMU0jZV9fSE5kKCEjPCQiMWgwYyhbaScqZSghIzwkIjEoKUcnKVxhejB3ISM8JCIxOV87NyVHPmkoISM8JCIxSnZZdTgxUXchIzwkIjFlKXBuTCU+YXchIzwkIjEmPXMhKkhGLm4oISM8JCIwXnU4RWdrbyghIzskIjFPb25CS2YteCEjPCQiMWwiemY9RSg9eCEjPCQiMFwiR1siZlt0KCEjOyQiMTxRZTVAKjR2KCEjPCQiMU9oKUcyRHJ3KCEjPCQiMFkpPU4hZUt5KCEjOyQiMSd5IVwoKjRSKnooISM8JCIxOUp6ZlJfOnkhIzwkIjFUYTRBcGxKeSEjPCQiMW14UiUpKSp5WnkhIzwkIjEkNCtuJUcjUid5ISM8JCIxNEMrNGUwISl5ISM8JCIxUFpJcigpPScqeSEjPCQiMWtxZ0w8Szd6ISM8JCIwUjRmcGElR3ohIzskIjE8PEBld2VXeiEjPCQiMVZTXj8xc2d6ISM8JCIxcGoiR2Vgbyh6ISM8JCIxKG89XmEnKUgqeiEjPCQiMTk1VTImPiI0ISkhIzwkIjBNQihwQ0REISkhIzskIjFtYy1LYVFUISkhIzwkIjEjKnpLJVI9djApISM8JCIwS0ltTl5PMikhIzskIjFYRSQqPVZ5KjMpISM8JCIxa1xCIkc8ZjUpISM8JCIxKkdQTkNdPzcpISM8JCIxOydSZT8kPVEiKSEjPCQiMVc+OW9oSmEiKSEjPCQiMEZXLzhcLzwpISM7JCIxKGZZRjQjZSc9KSEjPCQiMUIqW10wOkY/KSEjPCQiMVQ3TjwhWyk9IykhIzwkIjFsTmx6NClcQikhIzwkIjEkKmUmPiVSNl4jKSEjPCQiMEFlVSFwQ24jKSEjOyQiMVkwY20pekxHKSEjPCQiMXNHJylHR14qSCkhIzwkIi9fOyJ6WGNKKSEjOiQiMTx2WWAoeTxMKSEjPCQiMVYpcGRyNnpNKSEjPCQiMDxzIXlZL2skKSEjOyQiMSdcdS5reCxRKSEjPCQiMUNvbi0xSidSKSEjPCQiMVsielxjVkNUKSEjPCQiMXU5R0ZsZEclKSEjPCQiMSN6JGUqWzRaVykhIzwkIjE+aCk9WFUzWSkhIzwkIjFYJSk9OWEocFopISM8JCIxczJcdyQzSlwpISM8JCIvSnpROEM0JikhIzokIjFFYTQsVlBEJikhIzwkIjFfeFJqc11UJikhIzwkIjAyK2RBU3diKSEjOyQiMShSLSEpPXRQZCkhIzwkIjFCWkldaCEqKmUpISM8JCIxXHFnNyJSZ2cpISM8JCIxdiQ0XDJzQGkpISM8JCIxLjxAUF1JUScpISM8JCIxR1NeKip6VmEnKSEjPCQiMWBqIj0nNGRxJykhIzwkIjFzJz1UI1JxJ28pISM8JCIxKio0VScpbyRHcSkhIzwkIjFETHNbKXAqPSgpISM8JCIxX2MtNkc1TigpISM8JCIwKXpLdGRCXigpISM7JCIxLy5qTihvdHcpISM8JCIxS0UkenAsTnkpISM8JCIxW1xCZ1lqKnopISM8JCIxdnNgQXd3OikpISM8JCIxLidSW2UrPiQpKSEjPCQiMUg+OVpOLlspKSEjPCQiMWJVVzRsO2spKSEjPCQiMSNlWTxaKkghKSkpISM8JCIxMypbU1ZLayopKSEjPCQiMUU3TidSbEQiKikhIzwkIjFgTmxlJClwRyopISM8JCIwKGUmNEtKWyUqKSEjOzdgamwkIjBiIypSSiVleCopISM8JCIxbDZPc1ldUiIqISM9JCIweUgyLkQ5SSohIzwkIjEoUik0KlFYTFkqISM9JCIxQnBZWmRFRCcqISM9JCIwYU5lNSc9KHkqISM8JCIxYVQ/a2s1XCoqISM9JCIxeHNEI28tNiwiISM8JCIyJ1FUND1aSEY1ISM9JCIyLStKUnYnW1Y1ISM9JCIyPid5dyp5eSdmNSEjPSQiMk1zL2MjMyhlMiIhIz0kIjJoZFQ5J0cxIzQiISM9JCIydlZ5cypbRDM2ISM9JCIyIypIOkokcFdDNiEjPSQiMjM7XypvKlExOSIhIz0kIjJELSp5LzUkbzoiISM9JCIyUCllaVNJLXQ2ISM9JCIyY3VpazI6Iyo9IiEjPSQiMiIpZipIN3JTMDchIz0kIjInZms4WyIqZkA3ISM9JCIyN0t0Uj0ielA3ISM9JCIyRj01KT5LKVJEIiEjPSQiMlkvWmNEdixGIiEjPSQiMTFSWyJIbmpHIiEjPCQiMnZ3P3RLZkRJIiEjPSQiMGlkSk9eKD04ISM7JCIyPVslKiopUlZcTCIhIz0kIjJQTUpbVk42TiIhIz0kIjJcP28xWkZ0TyIhIz0kIjJtMTBsXT5OUSIhIz0kIjIiRz5NVTpyKlIiISM9JCIwenkieU4hZlQiISM7JCIyQ2s6U2gmNEs5ISM9JCIxL0QmKVx3R1s5ISM8JCIyYk8qbyZveldZIiEjPSQiMnNBRTpzcjFbIiEjPSQiMigpM2p0dmpvXCIhIz0kIjIuJioqPiR6YkleIiEjPSQiMTdvLkh5Q0g6ISM8JCIyVW10WycpUmFhIiEjPSQiMmZfNTIhPmpoOiEjPSQiMndRWmwkUiN5ZCIhIz0kIjIjXFVRc2YsJWYiISM9JCIxNjZBMyEzLWgiISM8JCIyRSh6MFcrU0U7ISM9JCIyUSRbKil6P2ZVOyEjPSQiMm5vSmQ2JXllOyEjPSQiMiNbJm86OndcbiIhIz0kIjIpNGFTKD1vNnAiISM9JCIyOEZVS0FndHEiISM9JCIxTCJ6IWZBYkI8ISM8JCIyVypmIlxIVyhSPCEjPSQiMmomR3ZJaiRmdiIhIz0kIjE0KCplbSRHQHgiISM8JCIyL2RFQ1M/JCl5IiEjPSQiMjtWaiNRQ14vPSEjPSQiMk5IK1RaLzIjPSEjPSQiMWJyJCo0bCpvJD0hIzwkIjJtLHVkYSkzYD0hIz0kIjF5M2giZSFHcD0hIzwkIjFKeFc8RVomKT0hIzwkIjEkZiVHYFltLD4hIzwkIjFhOTcqb2N5Ij4hIzwkIjJgSmVcc1tTJD4hIz0kIjF4XnpnMkNdPiEjPCQiMihRP2onektrJz4hIz0kIjIuISpvQyRbaSMpPiEjPSQiMWBkSW9vIikpKj4hIzwkIjJWaFVUISozXSwjISM9JCIyaVp6KlI0P0o/ISM9JCIydUw7ZShIUlo/ISM9JCIyJCo+YDssJmVqPyEjPSQiMWgrXFpxeHo/ISM8JCIyRiNwSyQzcGY0IyEjPSQiMmB4aiI+Njs3QCEjPSQiMmxqK106YCRHQCEjPSQiMSlcUDM+WFg5IyEjPCQiME91bUFQMjsjISM7JCIyPUE2REVIcDwjISM9JCIxJDNbJClIQEo+IyEjPCQiMlglXD1NTEo0QSEjPSQiMTE9LXFgXURBISM8JCIxZidlZVMocFRBISM8JCIyMF8mcFQlKil5RCMhIz0kIjEjUUt2WiIzdUEhIzwkIjJMQ3BMXnQtSCMhIz0kIjEwaD9cYlkxQiEjPCQiMmonSC8mZWRFSyMhIz0kIjIjRyl6M2lcKVFCISM9JCIxIm87bmxUXU4jISM8JCIyQmFgRHBMN1AjISM9JCIyVVMhUkdkVShRIyEjPSQiMmFFRlV3PE9TIyEjPSQiMnQ3ayshKTQpPkMhIz0kIjEqKTQhZiQ9K09DISM8JCIyMiZ5dHJRPl9DISM9JCIyTHF1diFmUW9DISM9JCIyWGM2TSV6ZCVbIyEjPSQiMmtVWyN6KnAyXSMhIz0kIjJ3RyYzOj8ncF4jISM9JCIyJVxAIzQwYUpgIyEjPSQiMTYhZm4zWSRcRCEjPCQiMkEoZWZBIlFiYyMhIz0kIjFERlZlLHQiZSMhIzwkIjJtZXBVPkF6ZiMhIz0kIjFbazVJVTY5RSEjPCQiMig0TCVmRTEuaiMhIz0kIjI7PCF5LCQpXFlFISM9JCIyRy48d0whcGlFISM9JCIyWipRWHRCKSl5RSEjPSQiMnd1IUg0VzImcCMhIz0kIjE0dzdYa0U2RiEjPCQiMi5aazRbZXVzIyEjPSQiMkFMLG9eXU91IyEjPSQiMSU+UUViVSlmRiEjPCQiMmAwdiUpZU1neCMhIz0kIjJsIj5KQ21BI3ojISM9JCIyKHAoWyxtPSUzRyEjPSQiMUpjKWZwNVkjRyEjPCQiMkdcQT10LTMlRyEjPSQiMWEkZnd3JSpwJkchIzwkIjJiQCdcLm89dEchIz0kIjF4SUxSKXkkKilHISM8JCIxUipwXigzZDBIISM8JCIyMCFvKzZId0BIISM9JCIyTWxWbyVcJnokSCEjPSQiMmBeIW8jKXA5YUghIz0kIjJsUDwmPSFSLihIISM9JCIyJVFVTmE1YCcpSCEjPSQiMiMqNCI+ITRCRiskISM9JCIxaHotRV4iKj1JISM8JCIyQiNbJz07Ml4uJCEjPSQiMl9uLHg+KkheSSEjPSQiMm5gUU5CIlxuSSEjPSQiMiQpUnYkcEtvJDMkISM9JCIwRTdfSXYpKjQkISM7JCIyPDdcNU1uZzYkISM9JCIxJClmKW9QZkE4JCEjPCQiMVhHczc5WFtKISM8JCIxKHBmJltNa2tKISM8JCIxZmxSJVtOMz0kISM8JCIyL1VMLV9GcT4kISM9JCIxI0dxZ2I+S0AkISM8JCIxV3IhPmY2JUhLISM8JCIxMVN1Rk9nWEshIzwkIjFuM2VqY3poSyEjPCQiMHM8JSpwKCl6RiQhIzskIjI5ZWFfdHpUSCQhIz0kIjFVOTRyPFA1TCEjPCQiMlhJR3AhUWNFTCEjPSQiMWxed1VldlVMISM8JCIydy0tJ3l5JSplTCEjPSQiMSopKVFXIipSXlAkISM8JCIyO3V2LSY+TCJSJCEjPSQiMS5FNicpUl8yTSEjPCQiMWwlXD4tO1BVJCEjPCQiMUVqeWQhMypSTSEjPCQiMSk9Qk80K2hYJCEjPCQiMDBnJUhASHNNISM7JCIxNnBIbFRbKVskISM8JCIyTXdMNj93WV0kISM9JCIxRTEocEJvM18kISM8JCIxKFsyR0ZncWAkISM8JCIxXFZrM0JEYE4hIzwkIjBAIltXVldwTiEjOyQiMXIhPS5RT2NlJCEjPCQiMk0kXDo7JUc9ZyQhIz0kIjEneSIqPlg/IT1PISM8JCIydmtHeVs3VWokISM9JCIxNGJtQlhTXU8hIzwkIjIxUC0mZmxmbU8hIz0kIjFLI1JgZil5I28kISM8JCIyVzR3NmohKSopcCQhIz0kIjFjSCxuRTw6UCEjPCQiMTMpXEdxazh0JCEjPCQiMXBtb1FuYlpQISM8JCIyOmBCWHhbUHckISM9JCIxI1JnLiIzJSp6UCEjPCQiMllEKD5ZRzgneiQhIz0kIjJiNk0/KVtLN1EhIz0kIjF4NCh5InBeR1EhIzwkIjFSeXFgKjNaJVEhIzwkIjEjcFcmKik0ITQnUSEjPCQiMWA6UURJNHhRISM8JCIxOiU9NzEmRyQqUSEjPCQiMXhfMCg0eCU0UiEjPCQiMVBAKkc4cGMjUiEjPCQiLkgobzYnPSVSISM5JCIxaGVjL0swZVIhIzwkIjE5RlNTX0N1UiEjPCQiMXYmUmlGUC8qUiEjPCQiMnVWdz9KSG0rJSEjPSQiMSpIOHpNQEctJSEjPCQiMDtdUFE4IVJTISM7JCIxQnFlPmE/YlMhIzwkIjEkKVFVYnVSclMhIzwkIjJhdGc3XCplKDMlISM9JCIyd2YoNEY6eS5UISM9JCIwWU1IY3QqPlQhIzskIjFAOHgpZmxoOCUhIzwkIjEjPTNZamRCOiUhIzwkIjFXXVdxJ1wmb1QhIzwkIjExPkcxPHUlPSUhIzwkIjFlKD1AdUw0PyUhIzwkIjBpYnp4RHJAJSEjOyQiMSJbI3o4eUpMVSEjPCQiMVYkSCdcKTQmXFUhIzwkIjEwaVkmKT1xbFUhIzwkIjJjMS44I1IqPUclISM9JCIyJkcqUnImZjMpSCUhIz0kIjIveXdIKnpGOVYhIz0kIjFVTyIpRytaSVYhIzwkIjJNXV1ZMWltTSUhIz0kIjFrdFsrVCZHTyUhIzwkIjJsQUNqOFkhelYhIz0kIjEpM2hAPFFfUiUhIzwkIjInXHoqej9JOVQlISM9JCIxLVskUUNBd1UlISM8JCIxaztuelUiUVclISM8JCIxRSYzYkoxK1klISM8JCIydlFYOE4pPndXISM9JCIxXEE9KFEhUiNcJSEjPCQiMDY+SVUjZTNYISM7JCIyOShmJillV3hDWCEjPSQiMUxHcCVcbTRhJSEjPCQiMSdvSDBgZXJiJSEjPCQiMVtsT20wTnRYISM8JCIyJzNNPy1FYSplJSEjPSQiMXItL1FZdDBZISM8JCIyQzh4UW5FPmklISM9JCIxJSpScjQoPSJRWSEjPCQiMmImM2JYMkphWSEjPSQiMTN4USJ5LTBuJSEjPCQiMiZwWEE8W3AnbyUhIz0kIjFKOTFgbylHcSUhIzwkIjEkSCkqKSkpKXkhPlohIzwkIjFiXnRDNEZOWiEjPCQiMTs/ZGdIWV5aISM8JCIxeikzaypcbG5aISM8JCIyMHRYQS5aUXklISM9JCIxI2YjM28hUishWyEjPCQiMk9YPlI1SmkiWyEjPSQiMldKYyhSSlVLWyEjPSQiMXhKZnZeaFtbISM8JCIxUStWNnMhWydbISM8JCIvcEVaIyoqNClbISM6JCIxX1A1JEciPigqWyEjPCQiMTkxJSo9TFE4XCEjPCQiMXd1eGFgZEhcISM8JCIxT1ZoIVJuZCVcISM8JCIxKj5ea1VmPidcISM8JCIwMSlHaTk6eVwhIzskIjI7I1w3KVxWVipcISM9JCIxdTwnUmBOMCwmISM8JCIxTycpenB2c0VdISM8JCIxKVxOY2c+SC8mISM8JCIxZkJaVDs2Zl0hIzwkIjFBIzR0bi5gMiYhIzwkIjJEM1lKciZcIjQmISM9JCIxV0gpKlt4bzJeISM8JCIxKHo+W3l6UTcmISM8JCIydWxjMSM9MlNeISM9JCIwXyRcY1FFY14hIzskIjEiUUlCKmVYc14hIzwkIjJOQ24iR3prKT0mISM9JCIxL1QraypSWz8mISM8JCIxbjQlKSoqPi5AXyEjPCQiMT55bk5TQVBfISM8JCIwbzk6MjtNRCYhIzskIjI6YV50NTMncF8hIz0kIjEvJSk9ViwhZUcmISM8JCIxbF8tekAqPkkmISM8JCIydjdpW0AlPT1gISM9JCIxKikqKXBdaVBNYCEjPCQiMVRlYCdHbzBOJiEjPCQiMkNxc0JLZ25PJiEjPSQiMWwmNCNlQiZIUSYhIzwkIjJiVVlTUlciKlImISM9JCIxKEckKSlIa0w6YSEjPCQiMVwsc2wlRzpWJiEjPCQiMCxkOl0/eFcmISM7JCIxdFFSUEQiUlkmISM8JCIxRDJCdFg1IVsmISM8JCIybGVuITRtSCdcJiEjPSQiMVpXIVxrKVs3YiEjPCQiMTQ4dSFvIW9HYiEjPCQiMXIieWxyc1thJiEjPCQiMkUuOkN2azVjJiEjPSQiMSYqPUQpeWNzZCYhIzwkIjFaKCkzQylbTWYmISM8JCIxM2MjKmYzazRjISM8JCIxcEN3JipHJGVpJiEjPCQiMUskKmZKXC1VYyEjPCQiMSQ+T3UncEBlYyEjPCQiMWJJRi4hNFduJiEjPCQiMToqNCJSNWchcCYhIzwkIjB4WVwyJHoxZCEjOyQiMGokeTVeKUhzJiEjOyQiMSNcP205eCJSZCEjPCQiMWB0WCM9cGB2JiEjPCQiMTtVSD03Y3JkISM8JCIxeDU4YUt2KHkmISM8JCIxUXonKipHWFIhZSEjPCQiMHovZUtQLCNlISM7JCIxYDtraCRIaiRlISM8JCIxOSZ5dVJARCZlISM8JCIxdmBKTE1yb2UhIzwkIjFRQTpwYSFcKWUhIzwkIjEqNCopXF0oNCxmISM8JCIwJ2YjM2EqRzxmISM7JCIxN0dtdzpbTGYhIzwkIjJXbipcN09uXGYhIz0kIjFPbExbYydlJ2YhIzwkIjEpUnRUb2Q/KWYhIzwkIjFmLSw/KFwjKSpmISM8JCIxQXIlZXZUVywnISM8JCIxJClSbyJ6TDEuJyEjPCQiMU4zX0ZlI28vJyEjPCQiMnZwZEwneSxqZyEjPSQiMWZYPioqKTQjemchIzwkIjBVSl0kPlMmNCchIzskIjEiR28zKFJmNmghIzwkIjFXXnExZ3lGaCEjPCQiMlkrVUQveVI5JyEjPSQiMW0peSR5KzxnaCEjPCQiMT1kQDlAT3doISM8JCIwZV8rOmFEPichIzskIjFVJSopZT1ZKDNpISM8JCIxL2pzQCNRXEEnISM8JCIyYjtqdkRJNkMnISM9JCIxRytTJEhBdEQnISM8JCIxKilvQkhWXnRpISM8JCIxVFAybGpxKkcnISM8JCIxLjEiNFMpKmVJJyEjPCQiMWt1dU8vNEFqISM8JCIxRFZlc0NHUWohIzwkIjEoPUAlM1haYWohIzwkIjFbIWVVYW0xUCchIzwkIjE3XDQhZWVvUSchIzwkIjFrPCRmaF1JUychIzwkIjFDJ288bFUjPmshIzwkIjEnWzB3b01hVichIzwkIjFaQldCbmleayEjPCQiMTQjeiNmKD15WSchIzwkIjFyZzYmejVTWychIzwkIjFNSCY0JEc/K2whIzwkIjEmeSp5bVtSO2whIzwkIjFabWktcGVLbCEjPCQiMTROWVEqeShbbCEjPCQiMFArVig0KFxjJyEjOyQiMUtzODVJOyJlJyEjPCQiMSQ0dWYvYnRmJyEjPCQiMWE0Ij0zWk5oJyEjPCQiMTN5azwiUihIbSEjPCQiMG4lW2A2JGZrJyEjOyQiMUo6Syo9QkBtJyEjPCQiMSNSZV5BOiR5bSEjPCQiMWFfKjRFMlhwJyEjPCQiMTpAJG9IKnA1biEjPCQiMXgqb0VMIipvcychIzwkIjFHZV1vTDNWbiEjPCQiMHBVVlN2I2ZuISM7JCIxYCZ6LFduYXgnISM8JCIxOmssdyVmO3onISM8JCIxd0smPV5eeSFvISM8JCIxUSxwWk4vQ28hIzwkIjEqKnBfJGVOLSVvISM8JCIxX1FPPndVY28hIzwkIjE5Mj9iJz5FKG8hIzwkIjF3di4icDYpKSlvISM8JCIxUFcob3MuXSFwISM8JCIxKUg2RncmPkBwISM8JCIwO1smKXooUVBwISM7JCIxQV1RTSl6TiZwISM8JCIxdD1BcT14cHAhIzwkIjFNKGVnIVInZilwISM8JCIxKWYmKj0lZjotcSEjPCQiMWZDdHh6TT1xISM8JCIwS3BOLFNYLighIzskIjEjPTElXD90XXEhIzwkIjFXSUMmM0NwMSghIzwkIjEwKno1NztKMyghIzwkIjFkbiJwOjMkKjQoISM8JCIxPU92Iz4rYjYoISM8JCIxI1shZkdBcEpyISM8JCIxVnRVa1UpeTkoISM8JCIxL1VFK2oya3IhIzwkIjFtNTVPJG8tPSghIzwkIjFHeiQ+UGdrPighIzwkIjF6WngyQ2w3cyEjPCQiMVQ7aFZXJSlHcyEjPCQiMS8mWyV6ay5YcyEjPCQiMWxgRzomRzdFKCEjPCQiMURBN14wVXhzISM8JCIxJzNmcGU3T0goISM8JCIwJmZ6QVkhKTR0ISM7JCIxLEdqZW0qZksoISM8JCIxaidwV3ApPVV0ISM8JCIxQ2xJSTJRZXQhIzwkIjEpUVZod3NYUCghIzwkIjFcLSk+IVt3IVIoISM8JCIxM3IieSRvJnBTKCEjPCQiMXNSbHQpW0pVKCEjPCQiMUMzXDQ0TVJ1ISM8JCIxJm9GYCVIYGJ1ISM8JCIxWVg7Iilcc3J1ISM8JCIwVCxxLDx6WyghIzskIjBGUUcwNFRdKCEjOyQiMUpebikzLC5fKCEjPCQiMSQqPl5DSlxPdiEjPCQiMVkpWy47Jm9fdiEjPCQiMTNkPSc+eClvdiEjPCQiMXBELUsjcF1lKCEjPCQiMUolZnlFaDdnKCEjPCQiMSNIJ3AuTFg8dyEjPCQiMWBKYFJga0x3ISM8JCIxOitQdnQkKVx3ISM8JCIxb28/NiVIZ20oISM8JCIwdFZxV0BBbyghIzskIjEiZiEpR1s4JSlwKCEjPCQiMWB1cj1iZzl4ISM8JCIxOlZiYXZ6SXghIzwkIjF2NlIhZiopcHUoISM8JCIxUCFHaWkiPWp4ISM8JCIxKSpbMWlPUHp4ISM8JCIxYDwhenBsYnooISM8JCIxOCdRUHRkPCJ5ISM8JCIxdmFkcChceiN5ISM8JCIxT0JUMD05V3khIzwkIjEpPlw3JVFMZ3khIzwkIjAxJzN4ZV93eSEjOyQiMUFII0gienIjKnkhIzwkIjFzKGYoWyo0KjN6ISM8JCIxT21mJSk+NUR6ISM8JCIxKVxMLy0lSFR6ISM8JCIxZS5GY2dbZHohIzwkIjBBMkA0eU8oeiEjOyQiMSMzV3o3cSkqKXohIzwkIjFWNHlqQDExISkhIzwkIjEmejwnKj5hQS0pISM8JCIxY1lYTmlXUSEpISM8JCIwXyJIciNRWTApISM7JCIxI1FHcklJMzIpISM8JCIxVl8nSE1BcTMpISM8JCIxL0AhKXlWQC4iKSEjPCQiMWwqUVlUMSU+IikhIzwkIjE+ZVpdJSlmTiIpISM8JCIwbzdqWyF6XiIpISM7JCIxVSZcQF8jKXo7KSEjPCQiMS5rKXpidVQ9KSEjPCQiMWxLI1FmbS4/KSEjPCQiMUYsbUgnZWxAKSEjPCQiMSopcFxsMXZLIykhIzwkIjAlUUwsRiUqWyMpISM7JCIxLDI8UFo4bCMpISM8JCIxanYrdG5LIkcpISM8JCIxRlclKTMpPXZIKSEjPCQiMShHIm9XM3I4JCkhIzwkIjFaIj0wKUchKkgkKSEjPCQiMCxiaiJcNFkkKSEjOyQiMWk9Pl9wR2kkKSEjPCQiMUIoRyEpKSp5JXkkKSEjPCQiMSVlbFEtcllSKSEjPCQiMVxDcWZJJzNUKSEjPCQiMEpSYjRicVUpISM7JCIwPHc4OFpLVykhIzskIjFKSUBuIlIlZiUpISM8JCIxJikpXEk/SmNaKSEjPCQiMVluKSlRSyM9XCkhIzwkIjEzT3N1XywzJikhIzwkIjFvL2M1dD9DJikhIzwkIjFLdFJZJCpSUyYpISM8JCIxIz5NQVEiZmMmKSEjPCQiMWA1Mj1NeXMmKSEjPCQiMTF6IVJYdiopZSkhIzwkIjFvWnUqW25eZykhIzwkIjBqImVEJmY4aSkhIzskIjEiXD05Y152aikhIzwkIjFgYEQoZlZQbCkhIzwkIjE5QTRMYyQqcCcpISM8JCIxdiFIKm93NydvKSEjPCQiMVBmdy8oPkJxKSEjPCQiMHotMXU2Jj0oKSEjOyQiMGxSa3guWnQpISM7JCIxOGxGN2UqM3YpISM8JCIxdkw2W3kzbigpISM8JCIxUC0mUikpekt5KSEjPCQiMSk0KHk+PloqeikhIzwkIjFlUmliUm06KSkhIzwkIjE4M1kiKmYmPSQpKSEjPCQiMXZ3SEYhWyFbKSkhIzwkIjFPWDhqK0NrKSkhIzwkIjEoUnIqKTRLLykpKSEjPCQiMEUzWzhDbSopKSEjOyQiMDdYMTw7RyIqKSEjOyQiMSMpPlsxIzMhSCopISM8JCIxTik9QkMrXyUqKSEjPCQiMShwYiJ5QVJoKikhIzwkIjBiIypSSiVleCopISM7N2BqbCQiMTEqZlJYXHkrKiEjPSQiMFZ3bG46LjwqISM8JCIxYkg+Kio9eUskKiEjPSQiMFs0PTdbX1wqISM8JCIxOWZVV1ZyZCcqISM9JCIxUEMvbjA9PykqISM9JCIxaiplJyp5WUUpKiohIz0kIjIoW3ZBLDheOTUhIz0kIjI2PypbQnp2STUhIz0kIjJNJjN2WFgrWjUhIz0kIjJoXTchbzZEajUhIz0kIjIjZVRGIXooXHo1ISM9JCIyPSFlYDdXdSY0IiEjPSQiMlVYKHpNNSo+NiIhIz0kIjJrNWZxbFAjRzYhIz0kIjFmMkt6VVtXNiEjPCQiMjhUI2UsNHRnNiEjPSQiMlAxV1FfeHA8IiEjPSQiMmpyMGg5Q0s+IiEjPSQiMiZmdE9vMlo0NyEjPSQiMkEsSDFSPGRBIiEjPSQiMlhtISpHLGs+QyIhIz0kIjJwSl9eajUjZTchIz0kIjImcFJUZHNYdTchIz0kIjI8aXYnelFxIUgiISM9JCIxdXMkPl1dcEkiISM8JCIydyIqKT5Dcj5COCEjPSQiMilwMFlZUFdSOCEjPSQiMkNBQShvLnBiOCEjPSQiMXZRKTQqcCQ+UCIhIzwkIjFGYkM4Tz0pUSIhIzwkIjImenJdTi1WLzkhIz0kIjFLKW94Jm9uPzkhIzwkIjJiWkkrW0JwViIhIz0kIjFHQEgtLDxgOSEjPCQiMi55YFhzOyVwOSEjPSQiMkRWOm9NamNbIiEjPSQiMmAzeCFwKjQ+XSIhIz0kIjJ4dFE4ZmMiPTohIz0kIjBSK09ALldgIiEjOyQiMksuaWUkKVwxYiIhIz0kIjJlb0IiZWsqb2MiISM9JCIyJVFgUSEzVkplIiEjPSQiMjEqcGstKCpRKmYiISM9JCIyS2szXEtPY2giISM9JCIyYUhxciVIKT1qIiEjPSQiMnglPlZwJkgiWzshIz0kIjI4ZiRwIj53Vm0iISM9JCIyTkNiUiJHaSFvIiEjPSQiMScqb0BPJXBvcCIhIzwkIjIkWyZ5JWVnNjg8ISM9JCIxLC11IW9pJEg8ISM8JCIxYD0rLiQ0Y3UiISM8JCIyZV1qXyNmJj13IiEjPSQiMiRcXl9aRDV5PCEjPSQiMjshb3lwIlxWeiIhIz0kIjJRWFs/eiZmNT0hIz0kIjJrNTVWVFVvIz0hIz0kIjFmPGRPISozVj0hIzwkIjI7VEwpZWNMZj0hIz0kIjFrXTQiRyNldj0hIzwkIjJucWNMISpHPSo9ISM9JCIyJ2YkPWNfdiEzPiEjPSQiMkEsISl5OUFWIz4hIz0kIjJYbVQseG8wJT4hIz0kIjJuSi5DUjpvJj4hIz0kIjFwXG05PzF0PiEjPCQiMjtpRXBqMyQqKT4hIz0kIjFsIyk9Zl9iMD8hIzwkIjJ1IipcOSk9IT0tIyEjPSQiMidwOnIuJlshUT8hIz0kIjFBSyhmNyZIYT8hIzwkIjJYKFtCWzxhcT8hIz0kIjJ1XydccSQpeSczIyEjPSQiMid6ImVGKlwuLkAhIz0kIjFCKT5daCJHPkAhIzwkIjF2OUdQI0diOCMhIzwkIjJ4N1YmZlt4XkAhIz0kIjIueS89W0Ahb0AhIz0kIjJEVm1TNW9VPSMhIz0kIjJbM0dqczkwPyMhIz0kIjJ1dCplWzh3O0EhIz0kIjInKlFeMyh6K0xBISM9JCIySy44SmZhI1xBISM9JCIyZW91YEAsYkUjISM9JCIxUWpqUHl1IkcjISM8JCIyMSp6KilmVyp6SCMhIz0kIjFWJ2ZAM1RVSiMhIzwkIjEmSEBXcShbSUIhIzwkIjFbSG9FVnRZQiEjPCQiMjhmVypbNClITyMhIz0kIjFXaT9ydkF6QiEjPCQiMScqeVkkPnVhUiMhIzwkIjIkWyZIZCIzczZDISM9JCIxLDcqelZuelUjISM8JCIxYEdEZ1NAV0MhIzwkIjJlXTlEb2cvWSMhIz0kIjFcaHgvdHF3QyEjPCQiMjcheS5GUiZIXCMhIz0kIjJRWCpIXDA/NEQhIz0kIjExNmNycldERCEjPCQiMidlRiNReiRwVEQhIz0kIjE2VzM7LyV6YiMhIzwkIjFqZ01RcT11RCEjPCQiMTJ4Z2dPViFmIyEjPCQiMiRmJHBHRyFvMUUhIz0kIjI6LEpeIXAjSGkjISM9JCIxa0VSRk48UkUhIzwkIjJrSmEnXCxVYkUhIz0kIjFwZiI+eG07biMhIzwkIjI3aXhUUjh6byMhIz0kIjFsI1JrLGdUcSMhIzwkIjJ1IjRxUW1TP0YhIz0kIjBkaTRFYG10IyEjOyQiMkFBQ0spKSoqR3YjISM9JCIyVyhlWzBsOXBGISM9JCIxRnZ1RkpSJnkjISM8JCIyJ3oiNCt2UjshRyEjPSQiMUIzRnNqKXkiRyEjPCQiMXZDYCUqSDhNRyEjPCQiMnQ3JXo7J3ouJkchIz0kIjInemQwUmlpbUchIz0kIjJEVjw4J0coRylHISM9JCIyYjN6Tls+IioqRyEjPSQiMnh0U2U1bWAiSCEjPSQiMFItIkdGaEpIISM7JCIxTFNPXSRmeSVIISM8JCIxJ29ERShmNWtIISM8JCIyeEwoKVtmXy4pSCEjPSQiMjEqKltyQCpmJypIISM9JCIxVjFUUmUlRywkISM8JCIxJkhzO1kjNEhJISM8JCIydCVSJFIzUmAvJCEjPSQiMjdmJj4xZGVoSSEjPSQiMVZzWEdCJHkyJCEjPCQiMmsqKT0yJip5UzQkISM9JCIxWzApSGRELjYkISM8JCIyMT9VXz5zbDckISM9JCIyTiZRXTwpPUc5JCEjPSQiMTFid1JhMWZKISM8JCIxXHItaT9KdkohIzwkIjEtKSlHJW9lOj4kISM8JCIyTlhdbEkweT8kISM9JCIyazU3KUc+MENLISM9JCIyJ2VQMl4mKUhTSyEjPSQiMTZhTHReYWNLISM8JCIxa3FmJnoienNLISM8JCIxMihleVRRISpHJCEjPCQiMWYuN1NdRzBMISM8JCIyOiwjUWk7YEBMISM9JCIyWG1WWUd5eEwkISM9JCIxO2AhcCFcLWFMISM8JCIxcHA7SDpGcUwhIzwkIjFBJ0c5Oj1sUSQhIzwkIjFsLXB0WnctTSEjPCQiMnUiPiZmUjYhPk0hIz0kIjIncE5APSFlX1YkISM9JCIxQF9aU1ldXk0hIzwkIjF1b3RpN3ZuTSEjPCQiMUYmKSpcKXkqUlskISM8JCIxeixFMlhDK04hIzwkIjJEIz1fSDZcO04hIz0kIjJhWiR5Xnh0S04hIz0kIjFHXi91VikqW04hIzwkIjB5MWoqNEJsTiEjOyQiMUslbyY9d1oiZSQhIzwkIjJXM0kzQ0N4ZiQhIz0kIjFQPDRqMyhSaCQhIzwkIjBRYGBbPC1qJCEjOyQiMk4uOnc1a2trJCEjPSQiMSZvdylIMnJpTyEjPCQiMVEkUUBOZCp5TyEjPCQiMCoqKlJ1Uj8mcCQhIzskIjJEa2htZl05ciQhIz0kIjJhSEIqPXNwRlAhIz0kIjFRXD1UUSVSdSQhIzwkIjEiZllNWSE+Z1AhIzwkIjFXIzNkM1BreCQhIzwkIjJhKilwenEkbyN6JCEjPSQiMVs6QkkuJCozUSEjPCQiMjE/JFxfcDxEUSEjPSQiMWBbdnVOVVRRISM8JCIxMWwsKD5xdyZRISM8JCIxXCJ5Iz5vIlIoUSEjPCQiMSwpUjpXaiwqUSEjPCQiMWE5IVExNWshUiEjPCQiMms1amdvY0UjUiEjPSQiMidlWkszTCEqUVIhIz0kIjE2a2VJKlxeJlIhIzwkIjFrIVtHYidSclIhIzwkIjEyKDRePFZ3KVIhIzwkIjFmOFAoeiopUSslISM8JCIxN0lqPms4P1MhIzwkIjFrWSo9LyRRT1MhIzwkIjE8ajprJ0hFMCUhIzwkIjFwelQnR3cpb1MhIzwkIjFAJ3onM0g3JjMlISM8JCIyV0VUNGBwODUlISM9JCIxPEg/YGhoPFQhIzwkIjBka2F4aVE4JSEjOyQiMkRBRXhSNCw6JSEjPSQiMXZ5KSo+Z05tVCEjPCQiMUYmXEFrLUU9JSEjPCQiMXo2XmsjXCkpPiUhIzwkIjJEI0d4JyllNDpVISM9JCIxdlcuNERNSlUhIzwkIjFGaEhKIiplWlUhIzwkIjIxeWROdk5RRSUhIz0kIjI6Vj5lUCMzIUclISM9JCIyVzMiMykqKkdqSCUhIz0kIjFRRk0/Y2Q3ViEjPCQiMjFRL0VDQSlHViEjPSQiMUxnJ1snKW9dTSUhIzwkIjEmb0ZyWzo4TyUhIzwkIjFQJCpRNEBjeFYhIzwkIjAqNGxKKDNRUiUhIzskIjJEazdSTmIrVCUhIz0kIjEmSHVoKD5JRVchIzwkIjFQZlYpZltEVyUhIzwkIjEiZihwP196ZVchIzwkIjFWI2ZIJT0vdlchIzwkIjJhKjNBbCUpRyJcJSEjPSQiMVtEWygzTnZdJSEjPCQiL1V1NDx5QlghIzokIjFgZStLJEcrYSUhIzwkIjEwdkVhXEZjWCEjPCQiMVwiSGxkQERkJSEjPCQiMSwzeik+bygpZSUhIzwkIjFgQzBAWywwWSEjPCQiMTFUSlY5RUBZISM8JCIyJ2VkZGwhM3ZqJSEjPSQiMTZ1JHlvYVBsJSEjPCQiMWohKjQ1OCtxWSEjPCQiMTEyT0t6QydvJSEjPCQiMidlQmlhWFwtWiEjPSQiMTdTKW88VCg9WiEjPCQiMWtjOSp6KClcdCUhIzwkIjE8dFNAV0JeWiEjPCQiMXAqb08vIltuWiEjPCQiMUAxJGZtRlB5JSEjPCQiMldFIz4pR3UqKnolISM9JCIxPFJYNTRBO1shIzwkIjIncGJyS3ZZS1shIz0kIjFBcyhcOjkoW1shIzwkIjF1KVFzeGdcJ1shIzwkIjFGMF0qUjI3KVshIzwkIjF6QHdAU1goKlshIzwkIjFCUS1XMXE4XCEjPCQiMmFaJkdtcyUqSFwhIz0kIjFHcmEpKVE+WVwhIzwkIjB5MzNeU0MnXCEjOyQiMUsvMkxyb3lcISM8JCIxJjNLYHZMXCpcISM8JCIxUFBmeC49Nl0hIzwkIjBRYikqKnBVRl0hIzskIjJOLjxAaXRPLyYhIz0kIjEnb3lWQz8qZl0hIzwkIjFQLmttbzt3XSEjPCQiMCo+ISopWzhDNCYhIzskIjFVTzs2LG0zXiEjPCQiMSZIRE10MVw3JiEjPCQiMidRcG9iTDpUXiEjPSQiMjtmW3ooKipSZF4hIz0kIjFWLUArbWt0XiEjPCQiMScqPVpBSyopKj0mISM8JCIyd2FMWiUpUmg/JiEjPSQiMjA/JipwWSdRQV8hIz0kIjJOJm9EKjNMJ1FfISM9JCIxJ1w9OnJ6W0QmISM8JCIydzkheUxqN3JfISM9JCIxLT0vY0hQKEcmISM8JCIxX01JeSY+T0kmISM8JCIyazVsMD9tKT5gISM9JCIxZm4jRyNHNk9gISM8JCIxNiUpM1glZkJOJiEjPCQiMk0wXXQxMSdvYCEjPSQiMTE8aCpvX1tRJiEjPCQiMWZMKD1KKjQsYSEjPCQiMTZdOE1mTTxhISM8JCIxa21SY0RmTGEhIzwkIjE6JGUneSJSKVxhISM8JCIxbyo+NCFlM21hISM8JCIxQDs9QkNMI1smISM8JCIxbEtXWCF6JilcJiEjPCQiMm0iXHFuYyNbXiYhIz0kIjIncGwnKipHczVgJiEjPSQiMUAjR0EiKj10YSYhIzwkIjF1KSpbTWJjamIhIzwkIjFGOnZjQCIpemIhIzwkIjIneUoseihlZ2YmISM9JCIyRCNbRixhSTdjISM9JCIxdmtgQj9iR2MhIzwkIjFGIil6WCcpeldjISM8JCIweWYhb18vaGMhIzskIjFLOUshKj1IeGMhIzwkIjJXMyRlNyZRTnAmISM9JCIybXRXWzgmeTRkISM9JCIxIlExcnZKZ3MmISM8JCIxTCFvJHokeUF1JiEjPCQiMSZvSDsrRCZlZCEjPCQiMm1MIipRaXJaeCYhIz0kIjAqSDpZIz01eiYhIzskIjJEazklb1tFMmUhIz0kIjEmSHcxXDZOI2UhIzwkIjFReiRINmUoUmUhIzwkIjI7Zio+TlorY2UhIz0kIjJDQ2h1Tl5BKGUhIz0kIjJgKkdzenpcKSllISM9JCIxW1gpPmdXWiFmISM8JCIvaUNDNyo0I2YhIzokIjFgeV1ZeUJQZiEjPCQiMShccChvV1tgZiEjPCQiMVs2LiI0SihwZiEjPCQiMSxHSDh4KGYpZiEjPCQiMWBXYk5WQS1nISM8JCIxMWgieSY0Wj1nISM8JCIyJ2V4MiFlPFouJyEjPSQiMFRSQj9rNDAnISM7JCIxYTVnQzNAbmchIzwkIjJjcWlvV2RNMychIz0kIjBPQyJwU3EqNCchIzskIjI6LCdRInBdZjYnISM9JCIxandrOHQ+S2ghIzwkIjJ1SjRmJFJXW2ghIz0kIjFwNDxlMHBraCEjPCQiMjBpSy89UDQ9JyEjPSQiMldFJXAtUT0oPichIz0kIjE7ZiZcVUlNQCchIzwkIjBkPHMveCdIaSEjOyQiMi9BeiVwTyNmQychIz0kIjF0M3UiSHFARSchIzwkIjFGRCs5cFR5aSEjPCQiMXpURU9ObSVIJyEjPCQiMUFlX2UsIjRKJyEjPCQiMXV1eSF5Y3JLJyEjPCQiMUciXElTLk1NJyEjPCQiMHk1YC1dJ2ZqISM7JCIxSkNkWm0qZVAnISM8JCIxJTNNKXBLOSNSJyEjPCQiMVBkNCMqKSpRM2shIzwkIjBRZFZeT1lVJyEjOyQiMUwhPm04JCkzVychIzwkIjElbyEpKWUoSHJYJyEjPCQiMVJCOSJRd0xaJyEjPCQiMCpSUy5JaSpbJyEjOyQiMVVjbUQncGVdJyEjPCQiMSVIRnpDO0BfJyEjPCQiMVEqKT1xR09RbCEjPCQiMSNmXUNcNFliJyEjPCQiMVVBcjloJjNkJyEjPCQiMScqUShwdC1yZSchIzwkIjFbYkJmJFxMZychIzwkIi9zXCIpZmY+bSEjOiQiMV4pZVBnVWVqJyEjPCQiMShcP2dBKjNfbSEjPCQiMVxAR1tlTG9tISM8JCIxLFFhcUNlJW8nISM8JCIxX2EhRzRIM3EnISM8JCIxMXIxOmQyPG4hIzwkIjFlKEd0TEFMdCchIzwkIjE0L2ZmKm8mXG4hIzwkIjFgPyY9ZTpldychIzwkIjExUDYvQTEjeSchIzwkIjFmYFBFKTMkKXonISM8JCIxNnFqW2FiOW8hIzwkIjFrJykqMzItMyRvISM8JCIxPC47JHBbcSVvISM8JCIxbz5VOmBIam8hIzwkIjE2T29QPmF6byEjPCQiMWxfJSpmJil5JipvISM8JCIxO3A/Iz1OPyJwISM8JCIwZG9XIT1HR3AhIzskIjBBSW5VR1glcCEjOyQiMXU9KipbXXhncCEjPCQiMUVORHI7LXhwISM8JCIxcF5eJEhvSypwISM8JCIxQW94OlxeNHEhIzwkIjF2JVEhUTp3RHEhIzwkIjFGLElnIjM/LyghIzwkIjF6PGMjeWEjZXEhIzwkIjFKTSNbUyxYMighIzwkIjElMyYzRiFbMjQoISM8JCIxT25NXFkqcDUoISM8JCIwUTM7RlRLNyghIzskIjFLKyhRKnlbUnIhIzwkIjEnb0poXk1kOighIzwkIjFRTFJRNik+PCghIzwkIjEqKVxsZ3hBKT0oISM8JCIxVW0iSFF1Vz8oISM8JCIxJkh5XitAMkEoISM8JCIxUipSdWlucEIoISM8JCIxImYsKFxVQGBzISM8JCIxVksnPigzWXBzISM8JCIxJipbQSVcMmRHKCEjPCQiMVtsWztUJj5JKCEjPCQiLyNbKFEyPz10ISM6JCIxXyk0NU9aV0woISM8JCIxJ1xySylScF10ISM8JCIwOkxiZ1NwTyghIzskIi9bekZzPSRRKCEjOiQiMWFrMF1RVipSKCEjPCQiMTAiPUJaIW86dSEjPCQiMWYoelg0Rj5WKCEjPCQiMTY5JW9ydCJbdSEjPCQiMWJJNVIuVWt1ISM8JCIxMlpPaHBtIVsoISM8JCIxY2ppJGU4cFwoISM8JCIxOCEpKWU/Z0peKCEjPCQiMWsnXCJHb1NIdiEjPCQiMTo4VF1NbFh2ISM8JCIxb0hucyshPmMoISM8JCIxNlkkXHBZInl2ISM8JCIxbWk+PExSJWYoISM8JCIxOnpYUipSMWgoISM8JCIxbiY+PGMnKW9pKCEjPCQiMUE3KVI9TEprKCEjPCQiMXZHQzEpeiRmdyEjPCQiMUVYXUdraXZ3ISM8JCIxb2h3XUkoPXAoISM8JCIxQXktdCc+IjN4ISM8JCIxdiUqRyZIbVZzKCEjPCQiMUU2YjxIaFN4ISM8JCIxeUYiKVImZm92KCEjPCQiMU1XMmloNXR4ISM8JCIxJDNPVnlfJCp5KCEjPCQiMU54ZjElKmYweSEjPCQiMFFmKUdnJT0jeSEjOyQiMUo1N15FNFF5ISM8JCIxJm8jUXQjUlYmeSEjPCQiMVBWayYqZWVxeSEjPCQiMCpmIXpeS28peSEjOyQiMVV3O1MiekkheiEjPCQiMSVISEN3RCQ+eiEjPCQiMVE0cCVRc2IkeiEjPCQiMGZfcCs+PSZ6ISM7JCIxVVVASGMxb3ohIzwkIjEmKmVaXkFKJSl6ISM8JCIxW3Z0dCllMCspISM8JCIxKj4qKmZcMG8sKSEjPCQiMV4zRT1AMEwhKSEjPCQiMSZcQTB1KUhcISkhIzwkIjFcVHlpYGFsISkhIzwkIjEsZS8mKT56IjMpISM8JCIxYHVJMidRISk0KSEjPCQiMS8icCZIX0c5IikhIzwkIjFlMiQ9Jj1gSSIpISM8JCIwVCM0dSV5bjkpISM7JCIxYVNOJzRESTspISM8JCIxMWRoPTxGeiIpISM8JCIxZnQoM009Yj4pISM8JCIxNiFSSidcdzYjKSEjPCQiMWoxUyZlNiFHIykhIzwkIjE8Qm0yI2VVQykhIzwkIjFwUiMqSFtdZyMpISM8JCIxNmM9Xzl2dyMpISM8JCIxbHNXdSEpKkhIKSEjPCQiMTsqM25wVyM0JCkhIzwkIjBkcSo9OFxEJCkhIzskIjFBQUJUenRUJCkhIzwkIjF1UVxqWCl6TikhIzwkIjFFYnYmPUpVUCkhIzwkIjA8PCEzeVohUikhIzskIjFAKXktVkNuUykhIzwkIjF2L2FfNShIVSkhIzwkIjFHQCFbbjwjUiUpISM8JCIxelAxKEhrYVgpISM8JCIxTGFLPjRyciUpISM8JCIxJTMoZVR2JnpbKSEjPCQiMUUoW1E7L1VdKSEjPCQiMSJRNWh5XS9fKSEjPCQiMC5zJDN1cE8mKSEjOyQiMSVvTDEuV0hiKSEjPCQiMVFgKkdsIT5wJikhIzwkIjEqKXA6dnNWJmUpISM8JCIxVCc9dSpRbywnKSEjPCQiMSVHIW8+MCR6aCkhIzwkIjFQPiU+OXhUaikhIzwkIjBmLlV3Qi9sKSEjOyQiMVVfWSdRcW1tKSEjPCQiMSUqb3MzcSJIbykhIzwkIjFcJikpNGpqIipwKSEjPCQiMSk+XUtENWFyKSEjPCQiMCY9XnZvbEooKSEjOyQiMSdcdHhcLnp1KSEjPCQiMVpeLj8sOmsoKSEjPCQiL29IVW5SIXkpISM6JCIxYCVlWE9WbXopISM8JCIxMCwjbykqKilHIikpISM8JCIxZDwzNG04SCkpISM8JCIwVFY4QiRRWCkpISM7JCIxYF1nYClIOycpKSEjPCQiMTFuJ2Vad3koKSkhIzwkIjFlJEciKTRCVCopKSEjPCQiMCwhUj8ocC4iKikhIzskIjFrO2xVamhFKikhIzwkIjE7TCJcJ0gnRyUqKSEjPCQiMW9cPChlNCJmKikhIzwkIjE2bVY0aU52KikhIzwkIjFrIylwSkdnIioqKSEjPCQiMTIqZlJYXHkrKiEjPDdgamwkIjE8KnB0ayUpZS4qISM9JCIxaXR2OWwmKSk+KiEjPSQiMCJbOSNRRz1PKiEjPCQiMWNBYFwtIVtfKiEjPSQiMTcnPnA2c3hvKiEjPSQiMWVxSSUpUnVdKSohIz0kIjIuWHBeZXI4KyIhIz0kIjEmPjM+eG93LCIhIzwkIjIoUnBrZWYnUi4iISM9JCIyVm8mUVhKRV01ISM9JCIyKkdXN0suY201ISM9JCIyTjxqKT12JkczIiEjPSQiMiI0PmcwWjoqNCIhIz0kIjJPbFNCKj1YOjYhIz0kIjIlKVJ6IXohXDw4IiEjPSQiMVYiPWVFWSFbNiEjPCQiMncpb2JfTU1rNiEjPSQiMUtjSFIxayE9IiEjPCQiMXhWLkV5JHA+IiEjPCQiMkM2dEYsTktAIiEjPSQiMWQ9Xio+SyZINyEjPCQiMjpnXWlRSGVDIiEjPSQiMmpNKilIZEVARSIhIz0kIjI2NEcoZlBVeTchIz0kIjJiJG9ZWTRzJUgiISM9JCIyLWUwSzg9NUoiISM9JCIyY0pXKj5gSkY4ISM9JCIyLzEkbzFEaFY4ISM9JCIyXyE9VSRwNCpmOCEjPSQiMidcMDshKW8/dzghIz0kIjElSCoqbzEvRFIiISM8JCIyKFEhUU9ELCkzOSEjPSQiMk95dy5XKTREOSEjPSQiMiM+YjZGY1JUOSEjPSQiMlBFYVEiR3BkOSEjPSQiMiIzSWYrKypSWiIhIz0kIjJGdkp0PShHIVwiISM9JCIyeFxxU1AlZTE6ISM9JCIyQUM0M2MiKUdfIiEjPSQiMm0pemFaKHkiUjohIz0kIjJBcydHTWZaYjohIz0kIjFuYS1ASnhyOiEjPCQiMj1Aa3hJcSEpZSIhIz0kIjJpJkhdJVxuVmciISM9JCIyMnFUN29rMWkiISM9JCIyYlchKXonPSdwaiIhIz0kIjA+PlowZktsIiEjOyQiMUV6WFRpYnA7ISM8JCIyMG4nPkdNJmVvIiEjPSQiMTphJFxoXUBxIiEjPCQiMihmVG4seVc9PCEjPSQiMS9IVCkpXHVNPCEjPCQiMidbOzp2QC9ePCEjPSQiMlFSISo9T1J0dyIhIz0kIjIjSCJIJ1tsaiR5IiEjPSQiMk8oeU9OUCQqKnoiISM9JCIxPW01QTRCOz0hIzwkIjFqYCUpMyJHRCQ9ISM8JCIyeDUlZSZIRClbPSEjPSQiMV9HSyNbQV4nPSEjPCQiMm1maCFwJz45KT0hIz0kIjJCTCtlJm9yKCo9ISM9JCIydjJSRC85UyI+ISM9JCIxQXlGSDdKST4hIzwkIjJrYztnVDNtJT4hIz0kIjIzSmJGZzBIJz4hIz0kIjJjMCVcKnktI3o+ISM9JCIvR0J3KipcJio+ISM6JCIyZWBySDsoejY/ISM9JCIyLkc1KFxWNEc/ISM9JCIxRCFca2AiUlc/ISM8JCIyJnB4PUIoKW9nPyEjPSQiMTlsIyo0ZilwMiMhIzwkIjFmX20nNCRHJDQjISM8JCIyTisvTUchZTRAISM9JCIxUkY5cXUoZTcjISM8JCIyTVsiKW9sdUA5IyEjPSQiMiNHLWlWPVplQCEjPSQiMXQqZS4ucFo8IyEjPCQiMnlyKDQ8aTEiPiMhIz0kIjJBWU9RU2p0PyMhIz0kIjJuP3YwZmdPQSMhIz0kIjI6JlJKeHgmKlJBISM9JCIyc29fUydcRGNBISM9JCIyPFYiel1AYnNBISM9JCIxdyxgUCRcKSlHIyEjPCQiMUAqb1VfWV5JIyEjPCQiMmFtMjVyVjlLIyEjPSQiMik0a3UoKjN1UEIhIz0kIjFiXlslM1FTTiMhIzwkIjIvKlFBcl9McUIhIz0kIjJbaml6WEttUSMhIz0kIjIkejhxVydISFMjISM9JCIxQyxXSm9BPkMhIzwkIjFwKXkiPVNfTkMhIzwkIjJMaDxcP0A9WCMhIz0kIjFlamwiUj0ib0MhIzwkIjElNCZSeWJUJVsjISM8JCIyJFFROGxGcitEISM9JCIxJGVzPSYqNHFeIyEjPCQiMnZLNidRcklMRCEjPSQiMkIyXWBLLydcRCEjPSQiMmsiKSkzNzohZmMjISM9JCIyN2NGKSlwKT4jZSMhIz0kIjEoSG1iKWVcKWYjISM8JCIyPS8wQjIkejlFISM9JCIyaXlWIWYtNEpFISM9JCIxSkR5WHVRWkUhIzwkIjF2N19LWW9qRSEjPCQiMC1nIz49KSp6RSEjOyQiMlp3KSpmK3ppcCMhIz0kIjIwXVBGPndEciMhIz0kIjJZQ3clekwoKUdGISM9JCIyJSopXEBtMDxYRiEjPSQiMU1QJkh2bjl3IyEjPCQiMXpDcFJcd3hGISM8JCIyTUFKazdpU3ojISM9JCIyI28qcEpKZi4iRyEjPSQiMS8oMyoqXGNtI0chIzwkIjFbdWsnb2BIJUchIzwkIjEkPidRdDNEZkchIzwkIjFQXDdnIVtiKEchIzwkIjI9b2pvQ1g9KkchIz0kIjFGQ2dMQzkzSCEjPCQiMjg8VC5pUlcjSCEjPSQiMmUiKnpxIW90U0ghIz0kIjI7bD1RKlIuZEghIz0kIjJrUmQwPUpMKEghIz0kIjIwOSdIbiRHJyopSCEjPSQiMScpWy5hYiNmKyQhIzwkIjIkSE94U0ZBQUkhIz0kIjF2Ql5GKj4mUUkhIzwkIjE+NkQ5ciJbMCQhIzwkIjFiKSopNEk5NjIkISM8JCIyJipmR3hbNnUzJCEjPSQiMVd0WXUnM1A1JCEjPCQiMiUpMzE3J2UrP0ohIz0kIjJOJFslei8uajgkISM9JCIxeU5vTS1nX0ohIzwkIjJDS0E5VSgqKW9KISM9JCIxZTU7M1k+Jj0kISM8JCIxLikqKlt6IlwsSyEjPCQiMVomUTspKil5PEshIzwkIjJFSHgkb2gzTUshIz0kIjFQZzZiTFFdSyEjPCQiMjp5YT1hIW9tSyEjPSQiMUVOZkd4KEhHJCEjPCQiMWlBTDpcRipIJCEjPCQiMmwrcj81c2JKJCEjPSQiMV4oNCkpR3A9TCQhIzwkIjJhXFtiWm0iW0whIz0kIjBDKEdpT1lrTCEjOyQiMSYpZi1cM3chUSQhIzwkIjIlSFp3TiFlcVIkISM9JCIyYlkuREFiTFQkISM9JCIxNEFDNENsSE0hIzwkIjJXJjQpZmZcZlckISM9JCIxKnA+RnlZQVkkISM8JCIxViVlJXBSYXlNISM8JCIyJSk9KD5jNiVbXCQhIz0kIjFLZiRITVE2XiQhIzwkIjJ3bXUnSGJWRk4hIz0kIjE4TVQ7RnRWTiEjPCQiMWVAOi4qSCtjJCEjPCQiMjshNCopKjNGamQkISM9JCIxWidIbUZDRWYkISM8JCIyMFJvTFlAKjNPISM9JCIxT3I1XSc9X2kkISM8JCIxc2UlbyRlXlRPISM8JCIxO1llQkkieWwkISM8JCIxaExLNS02dU8hIzwkIjEwQDEoUjIvcCQhIzwkIjInXDMhUWUvbnEkISM9JCIxJWZSMHgsSXMkISM8JCIwTXlzJiopSFJQISM7JCIyWTI8UzknZmJQISM9JCIwI2V2SUwqPXgkISM7JCIxa1hcPDA+KXkkISM8JCIyJzNMQi94Wy9RISM9JCIxYD8oNCpbeT9RISM8JCIxKXo1eDIjM1BRISM8JCIxVSZcV0V6TCZRISM8JCIxKEcpPV5rbnBRISM8JCIxQnEjemp0ZilRISM8JCIyJW9kbUMzRi1SISM9JCIxN1hTNiFvJj1SISM8JCIxZEs5KT5sWyRSISM8JCIxLD8pW1FpNiZSISM8JCIxWTJpciZmdSdSISM8JCIyMVxmJGVudiQpUiEjPSQiMUUjKTRYUjArUyEjPCQiMjAocCQ9OF5qLCUhIz0kIjE7ZGQ9JFtFLiUhIzwkIjIkZldKMGIlKltTISM9JCIxMEswI3BVXzElISM8JCIyJ1w+enkpUjozJSEjPSQiMk1wSWIxUHk0JSEjPSQiMiZIJXBBRE1UNiUhIz0kIjF1IjMhUjlWSVQhIzwkIjE+cHVEJ0duOSUhIzwkIjFqY1s3ZS1qVCEjPCQiMTRXQSoqSEt6VCEjPCQiMkM6amY9P2M+JSEjPSQiMncqPXFzdCI+QCUhIz0kIjFLMVdmWEBHVSEjPCQiMnVQemh1NlhDJSEjPSQiMUAiPUgkKjMzRSUhIzwkIjFtb2w+aDV4VSEjPCQiMTZjUjFMUyRIJSEjPCQiMWNWOCRcKyg0ViEjPCQiMi81dCl6dypmSyUhIz0kIjJsJD1obVtIVVYhIz0kIjBlXUwwI2ZlViEjOyQiMmFLKjNTIyopW1AlISM9JCIwMkdvVSc9IlIlISM7JCIxOm9jOE9bMlchIzwkIjFmYkkrM3lCVyEjPCQiMS9WLygpejJTVyEjPCQiMVJJeXReUGNXISM8JCIyV3lAME9zRVolISM9JCIxSDBFWiZwKilbJSEjPCQiMXUjKipSdG1fXSUhIzwkIjE9IVEyI1JjQFghIzwkIjFqbloyNid5YCUhIzwkIjJtXTpVSGVUYiUhIz0kIjFfVSY0W2IvZCUhIzwkIjEpKUhwbkV2J2UlISM8JCIyO3RKVyYpXElnJSEjPSQiMXgvPFRxTT5ZISM8JCIxQCM0ekFXY2olISM8JCIxbXprOTklPmwlISM8JCIxNm5RLCdRI29ZISM8JCIxYmE3KXlOWG8lISM8JCIwPmtbKEgkM3ElISM7JCIxTkhnaCw4PFohIzwkIjBvVCRbdFVMWiEjOyQiMUMvM05Yc1xaISM8JCIxcCI+PXNAZ3clISM8JCIyTyJ6YjMqPUJ5JSEjPSQiMWZtSCY0OycpeiUhIzwkIjElUk4/RzhcIlshIzwkIjInUVR4by9ASlshIz0kIjEkKUdeYnddWlshIzwkIjJ2aV5BJVshUSdbISM9JCIxcy4qKkc/NSEpWyEjPCQiMms2SGRAKlInKlshIz0kIjFpeVkta3A3XCEjPCQiMShmMSMqZSQqKkdcISM8JCIxVWAlZnghSFhcISM8JCIybTMlb2l6ZWhcISM9JCIxSkdVXF4peShcISM8JCIyYWRoaEwjPSUqXCEjPSQiMjFLK0hfei8sJiEjPSQiMWshUic0bnhFXSEjPCQiMjAheVAnKlEyVl0hIz0kIjJjYTtKM3IkZl0hIz0kIjIkKkdiKXAjb2MyJiEjPSQiMlguJWZjYSc+NCYhIz0kIjF6RkxWRUUzXiEjPCQiMUM6MkkpZlg3JiEjPCQiMiZvLSJvLGQzOSYhIz0kIjEvIVxOP2FyOiYhIzwkIjFceEchUl5NPCYhIzwkIjEkXEVxZFsoKj0mISM8JCIxUF93amQvMV8hIzwkIjEjKVJdXUhNQV8hIzwkIjJ3c1VzOFMnUV8hIz0kIjFyOSlSS1BcRCYhIzwkIjJ1Pz8yXk03RiYhIz0kIjFfKmV1cEp2RyYhIzwkIjEocCg+JSkpR1FJJiEjPCQiMFdPNDJFLEsmISM7JCIxJj12d0RCa0wmISM8JCIxSlJUVy9zX2AhIzwkIjJibl82ajwhcGAhIz0kIjBUIip5IltKJlEmISM7JCIxYixqLz9oLGEhIzwkIjIwISpvOD40elQmISM9JCIxV3c1eWo/TWEhIzwkIjIlKlFZW2MuMFgmISM9JCIyRDgmZV4yIW9ZJiEjPSQiMXlRS1F6NCRbJiEjPCQiMk1paV03JlIqXCYhIz0kIjFmOCE9SiNwOmIhIzwkIjJFNVMmKVwqKT5gJiEjPSQiMiVbKXlfbydHW2IhIz0kIjEjZjw/KFFla2IhIzwkIjJtTGMoZTUpM2UmISM9JCIxIzMmXFgjeXJmJiEjPCQiMUVRQkthWjhjISM8JCIyO2NzKj1FeEhjISM9JCIxMjhyMClwZ2smISM8JCIyMDBdQypwT2ljISM9JCIya3opPXpUbXljISM9JCIxVHYjZk9oXHAmISM8JCIyWUdtRWJlN3ImISM9JCIxSF1TUmRiRmQhIzwkIjFtUDlFSCZRdSYhIzwkIjInNEQpRzZdLHcmISM9JCIxYjdpKkhaa3gmISM8JCIxKSoqZmpbV0Z6JiEjPCQiMk91KTR0Oy80ZSEjPSQiMSpbUClmKVFgI2UhIzwkIjJEQndsL087JWUhIz0kIjFvXEpMSyR6JmUhIzwkIjE5UDA/L0J1ZSEjPCQiMWVDejF3XyEqZSEjPCQiMS03YCR6Q28hZiEjPCQiMVsqcC0pPjdCZiEjPCQiMjpwM3E7PiVSZiEjPSQiMU91dWBqcmJmISM8JCIxc2hbU04sc2YhIzwkIjE7XEFGMkopKWYhIzwkIjFpTydSInpnL2chIzwkIjExQ3ErXiE0LSchIzwkIjA6VHVHLXMuJyEjOyQiMScqKXpUWipcYGchIzwkIjImUic9NG0nenBnISM9JCIxdnRsWlE0JzMnISM8JCIwNydSTTVSLWghIzskIjJYJ1s4QCMpbz1oISM9JCIxNE8oeVMmKVw4JyEjPCQiMWFCaCVmI0deaCEjPCQiMiYpNF44eXp2OychIz0kIjFXKSozb3AoUT0nISM8JCIxKGVHWzp1LD8nISM8JCIyTktuOk1ya0AnISM9JCIxbmdJRyZvRkInISM8JCIyQyJbLzpkMVxpISM9JCIxZE55LEhPbGkhIzwkIjEtQl8pM2c7RychIzwkIjFZNUV2cyZ6SCchIzwkIjEieioqPllhVUonISM8JCIxRSZRKFs7YklqISM8JCIwRnhhJClbb00nISM7JCIxPGdAQWc5amohIzwkIjB3YSozS1d6aiEjOyQiMS9OcCZSU2RSJyEjPCQiMVxBViNlUD9UJyEjPCQiMSUqNDxwWkxHayEjPCQiMHQ0ZiY+aldrISM7JCIxdiVbRTlINFknISM8JCIxPnNRSGpBeGshIzwkIjFrZjc7Tl8kXCchIzwkIjEzWidHcT8pNGwhIzwkIjFgTWcqKXk2RWwhIzwkIjEpPlVqMjpDYSchIzwkIjFMNDNqQXJlbCEjPCQiMXgnPilcJTRdZCchIzwkIjFBJWVsajE4ZichIzwkIjFuckhCUWcybSEjPCQiMTZmLjU1IVJpJyEjPCQiMWJZeCc+KT5TbSEjPCQiL01eJFEmXGNtISM6JCIxUEBEcUR6c20hIzwkIjApMypwdiozKm8nISM7JCIxRSdIUCVwUTBuISM8JCIwUG8vOCVvQG4hIzskIjE7cj88OCl6dCchIzwkIjAnZSVSXXlVdichIzskIjEuWW8hcHYweCchIzwkIjBNQnUoRyhveSchIzskIjElM2lUMXFKIW8hIzwkIjFIMyE0RG4lPm8hIzwkIjF0JlJ3VmtkJG8hIzwkIjE9JHlWaWg/Jm8hIzwkIjFqcTY2KWUkb28hIzwkIjEyZSZ5KmZsJSlvISM8JCIxVFhmJT1gNCFwISM8JCIxKkdMOFBdcyJwISM8JCIxTD8yZXZhTHAhIzwkIjF3MiJbdVcpXHAhIzwkIjFBJlw6JD45bXAhIzwkIjFuIylHPSJSQylwISM8JCIwLEZdSU8oKSpwISM7JCIxWWR3IlxMXSwoISM8JCIxIlwvJnkxTEpxISM8JCIxT0tDbHlpWnEhIzwkIjApPik+MERSMSghIzskIjFEMnNRQUEhMyghIzwkIjBaZmFVPmw0KCEjOyQiMTojKT43bSJHNighIzwkIjFmcCQqKXo4IkhyISM8JCIxJXB2Yyk0VFhyISM8JCIxUVdUcyIzPDsoISM8JCIxJD1gImZgK3lyISM8JCIxSD4qZWEtVj4oISM8JCIxczFqSygqZjVzISM8JCIxPCVwJD5wKm9BKCEjPCQiMWgiM2g1JT5WcyEjPCQiMSkqbyVHSCJcZnMhIzwkIjFVY2V6JSl5dnMhIzwkIjEpUUNqbSYzI0goISM8JCIxTEoxYEdRM3QhIzwkIjF3PSEpUitvQ3QhIzwkIjBpU2xBeDRNKCEjOyQiMW0kektUdXNOKCEjPCQiMSwiPStnck5QKCEjPCQiMVpvdid5bykqUSghIzwkIjBmJlx0ZjsxdSEjOyQiMU1WQmdKWUF1ISM8JCIxekkocE1nKFF1ISM8JCIxQz1yTHYwYnUhIzwkIjBkXS9zYThaKCEjOyQiMTEkKj0yPmwoWyghIzwkIjFcIUdSNFxSXSghIzwkIjEjem0xR1ktXyghIzwkIjFSYlNuTWFPdiEjPCQiMSVHV1RsU0diKCEjPCQiMUdJKTMleThwdiEjPCQiMHhAdy1OYWUoISM7JCIxMjBPOUF0LHchIzwkIjFfIyo0LCVIIT13ISM8JCIxKCp6JHllRVZqKCEjPCQiMVRuZHVQaV13ISM8JCIxJ1s6OCc0I3BtKCEjPCQiMEJhIVsiPUtvKCEjOyQiMXZIek1gXipwKCEjPCQiMHJKOl83ZXIoISM7JCIxYy9GMyg0QHQoISM8JCIxLCM0XSpvU1t4ISM8JCIxVnp1IjMvWncoISM8JCIwcCdbbzcrInkoISM7JCIxTGFBYiUpSCh6KCEjPCQiMXpUJz5rJmY4eSEjPCQiMUNIcUdHKilIeSEjPCQiMWY7VzorPll5ISM8JCIxLi89LXNbaXkhIzwkIjFbIj4qKVEleXl5ISM8JCIxIyp5bHY6MyYqeSEjPCQiMVFtUmkoeTgieiEjPCQiMSNRTiJcZm5GeiEjPCQiMUVUKGU4dFIleiEjPCQiMWhHaEEuRmd6ISM8JCIxMTtONHZjd3ohIzwkIjFfLjQncGtHKnohIzwkIjEoNEhHKT07NCEpISM8JCIxVXljcCFmYS0pISM8JCIxJ2UxakRjPC8pISM8JCIwTFhJV2AhZSEpISM7JCIxbFN5SDFOdSEpISM8JCIwIkdfO3lrITQpISM7JCIxYjpFLl0lcDUpISM8JCIxKkgrKz5VSzcpISM8JCIxViFSblBSJlIiKSEjPCQiMHp4TWNPZTopISM7JCIxTWxAXVA4cyIpISM8JCIwRmJwJDRWKT0pISM7JCIxOFNwQiJHWj8pISM8JCIxZkZWNWAtQCMpISM8JCIxLzo8KFxBdEIpISM8JCIxWi0iUm8+T0QpISM8JCIxIioqWzEobyIqcCMpISM8JCIxT3hRZFNAJ0cpISM8JCIxc2s3VzdeLSQpISM8JCIxPF8nM1YzKT0kKSEjPCQiMCdSZzxjNU4kKSEjOyQiMTJGTS9HU14kKSEjPCQiMFgiMyIqKipwbiQpISM7JCIxJj4/eTwoKlJRKSEjPCQiMVQqZVhPJUgrJSkhIzwkIjF4d0heOmY7JSkhIzwkIjBVTyFRKCkpR1YpISM7JCIxa154Q2Y9XCUpISM8JCIxNFJeNkpbbCUpISM8JCIxYUVEKUgheSJbKSEjPCQiLzkqXFt4ISlcKSEjOiQiMVYsdHJZUDkmKSEjPCQiMCkpbyVlPW5JJikhIzskIjFBdz9YIXBwYSkhIzwkIjFvaiU+Qm1LYykhIzwkIjE4Xm89TWN6JikhIzwkIjFlUVUwMSdlZikhIzwkIjEuRTsjemRAaCkhIzwkIjFYOCEqeVxYRycpISM8JCIxIjNTYztfWmspISM8JCIxRil5Qk5cNW0pISM8JCIxcnY2UmxNeCcpISM8JCIxO2omZXNWT3ApISM8JCIwMSZmNzQlKjQoKSEjOyQiMTBRTCo0UWlzKSEjPCQiMVxEMidHTkR1KSEjPCQiMSVINkdaSyllKCkhIzwkIjFKK2JmJ0heeCkhIzwkIjF3KClHWW9VInopISM8JCIxPXYtTFNzMikpISM8JCIxaml3PjctQykpISM8JCIxNF1dMSU9LiUpKSEjPCQiMWFQQyRmOm0mKSkhIzwkIjEqXCMpKnpGIkgoKSkhIzwkIjFNN3NtKjQjKikpKSEjPCQiMXkqZk06MmIhKikhIzwkIjFBKCk+U1YhPSMqKSEjPCQiMW51JHBfLCJRKikhIzwkIjE4aW44KClSYSopISM8JCIxZFxUK2ZwcSopISM8JCIvUDooMyQqcCkqKSEjOiQiMU9DKlFGIUguISohIzwkIjEjPUoxWShlPiEqISM8JCIxPCpwdGslKWUuKiEjPDdgamwkIjB1OVROOD4xKiEjPCQiMCdbOHhZTkQjKiEjPCQiMClcOitneilRKiEjPCQiMSk0dkpLUEFiKiEjPSQiMUNePlkneWNyKiEjPSQiMVZfQHAqPiJ6KSohIz0kIjJoYEIjSGhELzUhIz0kIjFbYl9oLWc/NSEjPCQiMihmdiNRUldwLiIhIz0kIjI6ZEhoXylHYDUhIz0kIjJPZUolZUVqcDUhIz0kIjJhZkwyendmMyIhIz0kIjIjKWZOSSM0Sy02ISM9JCIwaFBgMGwnPTYhIzskIjI8aVJ3PTRdOCIhIz0kIjJQalQqPkxOXjYhIz0kIjJga1ZBWChwbjYhIz0kIjJybFhYZVRTPSIhIz0kIjFwdyVvciZRKzchIzwkIjI9blwiXClIbkAiISM9JCIyUW9eOSlSMkw3ISM9JCIyY3BgUDY9JVw3ISM9JCIydXFiZ0NpZEUiISM9JCIyIz54TnlqNSNHIiEjPSQiMUooZjFeXSUpSCIhIzwkIjJGdWhIayV6OTghIz0kIjJkdWpfeFE2TCIhIz0kIjJ5dmx2IUhbWjghIz0kIjIkcHgnKVJxI1FPIiEjPSQiMjl5cEA8cixRIiEjPSQiMkt6cldJOmxSIiEjPSQiMl4hUXhPJWZHVCIhIz0kIjE8ZTJwTj9IOSEjPCQiMig+eVAseGFYOSEjPSQiMjokKXpPJD0qPVkiISM9JCIyTSU9KWYnZkJ5OSEjPSQiMlwmUUcpNCFlJVwiISM9JCIydSdlZUlVIzReIiEjPSQiMil5eSlHT29zXyIhIz0kIjIxKikqPSZcN09hIiEjPSQiMksqPVxGbSYqZjohIz0kIjEwUnpmMkl3OiEjPCQiMnQiZjQjKltrI2YiISM9JCIxSHpSQyEqKSozOyEjPCQiMVQqKnBjSkxEOyEjPCQiMkUmPisqR3g7ayIhIz0kIjJXJ1JJQDktZTshIz0kIjJ2J2ZnYGJPdTshIz0kIjIkenohZm80MnAiISM9JCIxIioqNCM9UTAyPCEjPCQiMS4/Xl16UkI8ISM8JCIyWiw5RzNVKFI8ISM9JCIybC07XkAnM2M8ISM9JCIyJ1EhPXVNSUN4IiEjPSQiMjkvPyh6V3gpeSIhIz0kIjFgPy03Jz1eIT0hIzwkIjJZMUNWdWk5Iz0hIz0kIjJvMkVtKG8heSQ9ISM9JCIyJikzRyozNTphPSEjPSQiMjI1STc5JlxxPSEjPSQiMkQ2S05GUm8pPSEjPSQiMTpUJGVTJD0uPiEjPCQiMUZoOFF2Xz4+ISM8JCIyKVEiUS9ucmUkPiEjPSQiMjE6U0YhZUBfPiEjPSQiMkM7VV0kKmYmbz4hIz0kIjF1VE1uUyFcKT4hIzwkIjEnPVknKj5bNysjISM8JCIxKj1bPkwjZjw/ISM8JCIxLC1Ea2skUi4jISM8JCIyRUBfbGYhR10/ISM9JCIxQ1UmKUdaaW0/ISM8JCIxT2k6aClvSDMjISM8JCIxWyNlTSpISio0IyEjPCQiMilmLXdEcmw6QCEjPSQiMWpBMWU3K0tAISM8JCIyV0ZrLlJYJFtAISM9JCIxJ0dtRV8qb2tAISM8JCIyJClIb1xsTDU9IyEjPSQiMEpxc3l4dD4jISM7JCIxQUJkPj5zOEEhIzwkIjJPTHU9MG0rQiMhIz0kIjJhTXdUPTVrQyMhIz0kIjImWyR5a0phRkUjISM9JCIyLk8heVslKTR6QSEjPSQiMXNCMyJlVWFIIyEjPCQiMSVRJVE4bnk2QiEjPCQiMmRSJ29YMzhHQiEjPSQiMTIlKSl6KFxaV0IhIzwkIjInPi9INSI+M08jISM9JCIxQUNmVUs7eEIhIzwkIjFNVypbUDJOUiMhIzwkIjJjVyc+MjomKTRDISM9JCIydVgpXFJjPkVDISM9JCIyJnAvIT14UkRXIyEjPSQiMjhbLVQhUikpZUMhIz0kIjEkXC9rLkdfWiMhIzwkIjJiXDEob0BkIlwjISM9JCIyeF0zNUk7el0jISM9JCIyKT4wSkwvRUNEISM9JCIyO2A3Y2MvMWEjISM9JCIyTWE5enBbcGIjISM9JCIxYmxASUdIdEQhIzwkIjFuJj1EJ3BqKmUjISM8JCIyKHAwI1s0IilmZyMhIz0kIjI6ZUFyQURCaSMhIz0kIjJMZkMlZiRwJ1FFISM9JCIxMG1zIlw4XWwjISM8JCIyc2hHU2lkOG4jISM9JCIxSDFMYzxxKG8jISM8JCIyM2tLJykpZS8vRiEjPSQiMlZrTTQtIVI/RiEjPSQiMmFsT0s6TW50IyEjPSQiMW4nUWJHeUl2IyEjPCQiMXoxJXlUQSVwRiEjPCQiMjlwVSxibWR5IyEjPSQiMktxV0NvNUAhRyEjPSQiMTpudTlbWD1HISM8JCIyeXJbcSUqKXpNRyEjPSQiMiNIMk56STleRyEjPSQiMjx1XztAKFtuRyEjPSQiMkd2YVJNSlEpRyEjPSQiMmB3Y2ladiwhSCEjPSQiMXgoZSYzJz5sIkghIzwkIjImKXlnM3VqRyRIISM9JCIyMSFHO3R5P1xIISM9JCIyTSFbWTA/YmxIISM9JCIyYiJvd1BoKj0pSCEjPSQiMnQjKW8rRlMjKSpIISM9JCIxUjNQLVdlOUkhIzwkIjItJkduTSZHNC4kISM9JCIyRidbKHBtc3MvJCEjPSQiMXVvRip6O08xJCEjPCQiMnMoKXk6JDQnKnpJISM9JCIyKCkpMylRMTBqNCQhIz0kIjEsSD0nPlxFNiQhIzwkIjE3XFtHTCoqR0ohIzwkIjFEcHlndUxYSiEjPCQiMmwkKikzJGYib2hKISM9JCIxWzRSRGQteUohIzwkIjIvJkhwZClwVj4kISM9JCIxalwqKiopUnI1SyEjPCQiMXVwSEEiZXFBJCEjPCQiMmspKilmYUFTVkshIz0kIjEpKjQhcFFZKGZLISM8JCIwLC4jPjA0d0shIzskIjFBXV1eWVYjSCQhIzwkIjFEcSFReXkoM0whIzwkIjFQITRoIkg3REwhIzwkIjFcNVRbcVlUTCEjPCQiMjExODI9NnlOJCEjPSQiMkMyOklKYlRQJCEjPSQiMSUzPGBXKlwhUiQhIzwkIjEoND53ZFZvUyQhIzwkIjEqNEAqNHg9Qk0hIzwkIjIwNkJBJT1gUk0hIz0kIjFBXl91ZihlWCQhIzwkIjFNciNvNT9BWiQhIzwkIjFZIkgiUlVjKVskISM8JCIyJWU2VnIkM1xdJCEjPSQiMiZwSnQuRERATiEjPSQiMXNeLk9tZlBOISM8JCIxJT1QJG8yJVJiJCEjPCQiMmw+UjEhXEdxTiEjPSQiMTM3JUguSG1lJCEjPCQiMEFWXzt0SGckISM7JCIxSl9hKEg8JD5PISM8JCIyV0NaKUg5bU5PISM9JCIya0NcQGMwP2wkISM9JCIxZjdYJXBcJG9PISM8JCIwRmBuI1FwJW8kISM7JCIyREdiIWZ6LixQISM9JCIxJEhkODQjUTxQISM8JCIxMSRmT0FFUHQkISM8JCIxPDgnZk5xK3YkISM8JCIyMUtqIylbOWt3JCEjPSQiMUtgYz8nZUZ5JCEjPCQiMVd0J0d2LSIqeiQhIzwkIjFiJHBeKW9XOlEhIzwkIjFuOFo8NXpKUSEjPCQiMid6THhcXjhbUSEjPSQiMjhSdj9HelcnUSEjPSQiMS51UDlNIzMpUSEjPCQiMTElem1hbnIqUSEjPCQiMT05KSp5O144UiEjPCQiMiZITUc2ZSYpSFIhIz0kIjFUYWVWKio+WVIhIzwkIjFgdSllMldEJ1IhIzwkIjFsJSo9MyMpKSl5UiEjPCQiMXg5XFNCQiYqUiEjPCQiMiV6TXpza2Q2UyEjPSQiMSJcJjQwMSN6LSUhIzwkIjEudlJQWkVXUyEjPCQiMTomKnBwKTMxMSUhIzwkIjJsXyw/K2BwMiUhIz0kIjFSTklNckgkNCUhIzwkIjFeYmdtN2s0VCEjPCQiMk9iMiopUiYpZjclISM9JCIyYWM0N2BIQjklISM9JCIxeTpeak9uZVQhIzwkIjEqZThlejxdPCUhIzwkIjI5ZzoiRz5PIj4lISM9JCIyRGg8LzExeD8lISM9JCIxRCc+Rj5dU0ElISM8JCIxRjstRFZSU1UhIzwkIjInUk9LZCVRbkQlISM9JCIyOWxEJyplIzN0VSEjPSQiMWp3Iz5zRSUqRyUhIzwkIjF2J0hVJjN4MFYhIzwkIjEob0psKVw2QVYhIzwkIjImKXBMKT0iZiVRViEjPSQiMSxkOF5LIVtOJSEjPCQiMTh4ViRRWjZQJSEjPCQiMUQoUmReIlwoUSUhIzwkIjJtdFQhW2MkUVMlISM9JCIxXFBNIXl6LFUlISM8JCIwd1hFIlJfT1chIzskIjFzeCVcL29HWCUhIzwkIjJieFxzPDcjcFchIz0kIjEoeV4mNGpiJlslISM8JCIvUSY9Vys+XSUhIzokIjAiZTp1WEM9WCEjOyQiMUJ5WDEoKWVNWCEjPCQiMU0pZihRRyQ0YiUhIzwkIjFZPTFycEZuWCEjPCQiMWRRTy42aSRlJSEjPCQiMjknZW1OXycqKmYlISM9JCIxc3knek80amglISM8JCIxJikpcC1dYEVqJSEjPCQiMScqPWRLdyoqW1khIzwkIjEzUihbd1RgbSUhIzwkIjAjZjwoKmVvIm8lISM7JCIxS3paSCsuKXAlISM8JCIxTSp6PDt1VnIlISM8JCIxWj4zJUg9MnQlISM8JCIyJmVSUUVDMVpaISM9JCIwKGZvZWxTalohIzskIjEjKXopNHBdKHpaISM8JCIxJSoqKkdCWzQneiUhIzwkIjExP2ZiKlFDIlshIzwkIjIlM1MqeTMkeUdbISM9JCIwLSc+P3M3WFshIzskIjFLISlcXzhaaFshIzwkIjFXKyFbWzp5KFshIzwkIjJjMC1yaGZUKlshIz0kIjJ1MS8lXFBdNVwhIz0kIjAzMTwpeSVvI1whIzskIjJFMzNTLCM+VlwhIz0kIjJXNDVqOU8mZlwhIz0kIjExQGh5LSllKFwhIzwkIjE9VCI0VENBKlwhIzwkIjA4O0thbyYzXSEjOyQiMVUiPWJuN1wtJiEjPCQiMWAsI3khb0RUXSEjPCQiMWNAN1M0Z2RdISM8JCIxb1RVc10lUjImISM8JCIwPUVaPypHITQmISM7JCIyOj5HcUxMbTUmISM9JCIxLi1McHUoSDcmISM8JCIxOkFqLDtLUl4hIzwkIjFGVSRSdGxjOiYhIzwkIjInSGlCbSk0PzwmISM9JCIyOUNRJikqUk4pPSYhIz0kIjFgLSUzOClwL18hIzwkIjFtQTlqQS9AXyEjPCQiMnVGV2FSJ1FQXyEjPSQiMSpHWXhfSVBEJiEjPCQiMSwkWyttdStGJiEjPCQiMS8uTiN6PWtHJiEjPCQiMmNKX1kjSHctYCEjPSQiMnVLYXAwMiI+YCEjPSQiMVJqRCo9XmFMJiEjPCQiMV4kZTpLJnpeYCEjPCQiMWouJ1FYUiJvYCEjPCQiMlhQaWhlJFslUSYhIz0kIjF4Vlk9eCMzUyYhIzwkIjEqUW0yJj08PGEhIzwkIjEsJW9JKWZeTGEhIzwkIjJFVHFgNmcpXGEhIz0kIjJXVXN3Qy9pWSYhIz0kIjFQVygqeiRbRFsmISM8JCIyJVxrRjdEKikpXCYhIz0kIjFoJXlYa09fXiYhIzwkIjFrLylveCFlSmIhIzwkIjF2Qz00XCN6YSYhIzwkIjJ2WyVbVCFwVWMmISM9JCIyJylcJ3l0SmghZSYhIz0kIjE3JikzMXQmcGYmISM8JCIyT18hUlE5SThjISM9JCIxTURwcWJrSGMhIzwkIjFQWCpIcSopZmsmISM8JCIwYidITlFMaWMhIzskIjBjKWZuem55YyEjOyQiMk5kKyoqNEFdcCYhIz0kIjElZS1BQm04ciYhIzwkIjEnZi9YTzV4cyYhIzwkIjJ2ZzFvXGFTdSYhIz0kIjI7aDMiSCcpUmdkISM9JCIxQjFUaEZ1d2QhIzwkIjJYajdQKm8zJHomISM9JCIxWVksRTVWNGUhIzwkIjFmbUplXnhEZSEjPCQiMG49MUg+QCVlISM7JCIxI28/SFVqJWVlISM8JCIyV29BX2IyWyhlISM9JCIyd3BDdm9eNiplISM9JCIxM24jKT5lXDJmISM8JCIwc0dAJipSUSNmISM7JCIxTDJWJTMlPVNmISM8JCIxWEZ0OyNHbCZmISM8JCIxYlouXEIoRyhmISM8JCIxZW5MIls7IyopZiEjPCQiMi94UU9oZ2IrJyEjPSQiMSR5U2Z1Lz4tJyEjPCQiMSV6VSN5KVsjUWchIzwkIjExW2E1SWZhZyEjPCQiMT1vJUc5UDQyJyEjPCQiMCQpW15GIkcoMychIzskIjFLM1gyYWkuaCEjPCQiMVdHdlImcCo+aCEjPCQiMWRbMHNPSk9oISM8JCIxcG9OL3lsX2ghIzwkIjF6KWVtJD4rcGghIzwkIjJEKjMnKm9nTSY9JyEjPSQiMS9IRSwtcCxpISM8JCIxO1xjTFYuPWkhIzwkIjJ1InAnZVl5VkInISM9JCIwJCpvIilmQTJEJyEjOyQiMVU0WkluMW5pISM8JCIxYkh4aTNUJEcnISM8JCIxbVwyJipcdipIJyEjPCQiMXlwUEYiKjQ7aiEjPCQiMSkpKnknZktXS2ohIzwkIjEjKjQpPlIoeVtqISM8JCIxMElHQzo4bGohIzwkIjE7XWVjY1oiUSchIzwkIjFGcSkpKXk+eVInISM8JCIwLyo9QFI7OWshIzskIjAwIlxgITMwVichIzskIjFqSXomPV9vVychIzwkIjFtXTQ9aj5qayEjPCQiMXhxUl0vYXprISM8JCIwNCpwI2UlKWVcJyEjOyQiMS02KzooR0FeJyEjPCQiMTlKSVpHZEdsISM8JCIxQ15nenAiXGEnISM8JCIxUXIhPjZoN2MnISM8JCIwOTRVQzB3ZCchIzskIjA6NmxQXFJmJyEjOyQiMWtKIikzTkg1bSEjPCQiMXheNlR3akVtISM8JCIxKT08TXgiKUhrJyEjPCQiMSk+PmQhZktmbSEjPCQiMTY3LVErbnZtISM8JCIxO0tLcVQsI3AnISM8JCIxRF9pLSRlJDNuISM8JCIxT3MjXFYtWnMnISM8JCIxXCNIc2NZNXUnISM8JCIxaDdgKnAhUmRuISM8JCIxdUskPSRbdHRuISM8JCIxJUdOVCcqeSt6JyEjPCQiMSlHUGs0QmshbyEjPCQiLyRSKEdzd0FvISM6JCIxNjgvaDg2Um8hIzwkIjFBTE0kXGJhJm8hIzwkIjFPYGtEJyp6cm8hIzwkIjFadCV6dlYiKSlvISM8JCIxZSRcLSp5Wy9wISM8JCIwT15ELUszI3AhIzskIjF2TCZbOndyJHAhIzwkIjEmUWJyRz9OJnAhIzwkIjEoUmQlPlcnKXBwISM8JCIxMyVmPGIzaSlwISM8JCIxQTkxJW9fRCsoISM8JCIxS01PO28qKT1xISM8JCIxT2FtWzRDTnEhIzwkIjFZdSc0MyZlXnEhIzwkIjBZcEtASHoxKCEjOyQiMXI5ZFhMRiUzKCEjPCQiMSNbdHlaPDE1KCEjPCQiMSVcdixoaHA2KCEjPCQiMTJ2WlVkSUxyISM8JCIxPSZ6WigpXCdcciEjPCQiMT46MzJTKmY7KCEjPCQiMUtOUVIiUUI9KCEjPCQiMVlib3JBbyk+KCEjPCQiMWR2KVJTRV1AKCEjPCQiMW8mKkdPMFBKcyEjPCQiMGUiZm9ZclpzISM7JCIxImYkKjMhKWVTRSghIzwkIjElZiY+TEhTIUcoISM8JCIxMHdcbHF1J0goISM8JCIxPicqeig+IjQ4dCEjPCQiMUs7NUlgVkh0ISM8JCIxVk9TaSV6ZE0oISM8JCIxX2NxJWZCQE8oISM8JCIxbXcrRnhZeXQhIzwkIjFwJzQkZj0iW1IoISM8JCIwbzY7KmY6NnUhIzskIjEicDhSNyt2VSghIzwkIjEvZEBjVSVRVyghIzwkIjE7eF4pUSk9Z3UhIzwkIjFGKD4zX0tsWighIzwkIjB1QEpsd0dcKCEjOyQiMVVQVSZ5PyM0diEjPCQiMWFkczxcY0R2ISM8JCIxbXgtXSE0PmEoISM8JCIxeChIQj1gI2V2ISM8JCIwekpZSihmdXYhIzskIjEtUSRwV1Q0ZighIzwkIjE4ZUJ6YkcydyEjPCQiMTt5YDYoSE9pKCEjPCQiMUcpUlElUSgqUnchIzwkIjAlPTl3ekpjdyEjOyQiMV9RVzNAbXN3ISM8JCIxamV1U2krKm8oISM8JCIxeHkvdC5OMHghIzwkIjEoKSlcYF0lcEB4ISM8JCIwKj1sUCdRIVF4ISM7JCIxLVImKnBGUWF4ISM8JCIxOWZELXBzcXghIzwkIjFFemJNNTIoeSghIzwkIjFRKmZvOzpNIXkhIzwkIjFcPjsqSGYoPnkhIzwkIjFpUllKTTVPeSEjPCQiMXRmd2p2V195ISM8JCIxeHoxJ3Aiem95ISM8JCIxKSkqcCRHZTgmKXkhIzwkIi5zMScqejkheiEjOSQiMTdTKEg0Q3kieiEjPCQiMUNnRkQjb1QkeiEjPCQiMU4heXZONzAmeiEjPCQiMVkrKSkqW2NvJ3ohIzwkIjFcPz1BMT8kKXohIzwkIjFqU1thWmEqKnohIzwkIjF0Z3knKSkpKWUsKSEjPCQiMSYzKTM+SUJLISkhIzwkIjEoNCFSXnJkWyEpISM8JCIxNEBwJEdAXDEpISM8JCIwNyUqZlRsNzMpISM7JCIxQ2hIWyY0dzQpISM8JCIxTiIpZiFvYFI2KSEjPCQiMVosIUgieUhJIikhIzwkIjFmQD9YPmtZIikhIzwkIjFyVF14ZylIOykhIzwkIjEkPTEpNC1MeiIpISM8JCIxJj4zQE11Yz4pISM8JCIxKD41V1o9P0ApISM8JCIxM0FyMUVPRyMpISM8JCIxQVUsUm5xVyMpISM8JCIxS2lKcjMwaCMpISM8JCIxVyM9TysmUngjKSEjPCQiMWQtI2Y4UlBIKSEjPCQiMEZBI29LMzUkKSEjOyQiMXJVXyt1VUUkKSEjPCQiMSNHRUdgckZNKSEjPCQiMSVIR15tOiJmJCkhIzwkIjEyLlYoemZhUCkhIzwkIjE9QnRIUiE9UikhIzwkIjFIVi5pIVsiMyUpISM8JCIxVmpMJT4jXEMlKSEjPCQiMVkkUW1LTzNXKSEjPCQiMWQuJSplLz1kJSkhIzwkIjFwQkMiZkNOWikhIzwkIjEjUVdOc28pKlspISM8JCIxJFJZZSZHQDEmKSEjPCQiMS8lWyIpKXBiQSYpISM8JCIxOy9YPzYhKlEmKSEjPCQiMT5Ddl9fQ2ImKSEjPCQiMUtXMCZRKmVyJikhIzwkIjFUa048TiR6ZSkhIzwkIjFiJWUnXHdGLycpISM8JCIxbS8nPnlAMWkpISM8JCIxeENFOWYncGopISM8JCIwXGtsLzVMbCkhIzskIjEkXG0peVRscCcpISM8JCIxMCZvNkopKmZvKSEjPCQiMTswWlZDTS0oKSEjPCQiMUZEeHZsbz0oKSEjPCQiMGF1ITMyLk4oKSEjOyQiMV9sUFNbUF4oKSEjPCQiMWomeUUoKj14dykhIzwkIjF2MClcNWpTeSkhIzwkIjF4REdQc1MrKSkhIzwkIjEiZiVlcDh2OykpISM8JCIxLG0pPV0mNEwpKSEjPCQiMTgnKT1NJ1IlXCkpISM8JCIxRjFcbVB5bCkpISM8JCIxUUV6KSp5NyMpKSkhIzwkIjBsJTRKP1opKikpISM7JCIxX21SamgiWyIqKSEjPCQiMW0nKXAmSGc2JCopISM8JCIxdzErR1ddWiopISM8JCIxKG8tLmNbUScqKSEjPCQiL1pnI3AjPiEpKikhIzokIjE3biFcI29gJyoqKSEjPCQiMUMoM3MmNClHLCohIzwkIjFFMl4qM0QjSCEqISM8JCIxUUYiPUFwYi8qISM8JCIxVVo2YUwiPjEqISM8N2BqbCQiMWkuZ18sOCczKiEjPSQiMXNdYV4jMytEKiEjPSQiMSJ5KltdailRVCohIz0kIjEqW00lXFd3eCYqISM9JCIxMyJ6JFtEa1QoKiEjPSQiMTxRS1oxXzAqKiEjPSQiMkQmb2l1KVJwKyIhIz0kIjJPS0BYb0ZMLSIhIz0kIjJWejpXXDooUjUhIz0kIjFsLUovTDVjNSEjPCQiMml0L1U2IlxzNSEjPSQiMTIjKjRDKnkpKTMiISM8JCIyKm9PKlJ0bV81IiEjPSQiMidSIikpUWFhOzciISM9JCIyMGgjeWBCL1E2ISM9JCIyODN4TztJVzoiISM9JCIyQWJyTih6IjM8IiEjPSQiMUJnWSR5MHM9IiEjPCQiMlRcZ0xmJGYuNyEjPSQiMmUmXEQuOSkqPjchIz0kIjFGJVxKQHBqQiIhIzwkIjJ2KlEvQnF2XzchIz0kIjIkbyRRSCRbOXA3ISM9JCIyJ1JHJEdrS2JHIiEjPSQiMjBKRkZYPz5JIiEjPSQiMSJ5QEVFMyQ9OCEjPCQiMVZpXnNncE04ISM8JCIxOTJUIylRM144ISM8JCIyWz0wQnBydU8iISM9JCIyYWwqPi0mZlFRIiEjPSQiMms3JTQ3dEMrOSEjPSQiMndmKSk+N05tVCIhIz0kIjIjb0kpPSRILUw5ISM9JCIyLGB4PHU1JVw5ISM9JCIyNCtzO2Ipemw5ISM9JCIyPVptOk8nPSNbIiEjPSQiMkclNFlyVGQpXCIhIz0kIjJSVGI4KT4nXF4iISM9JCIyWSkpXDd6XDhgIiEjPSQiMmJOVzZnUHhhIiEjPSQiMTwpUTVURFRjIiEjPCQiMnhHTDRBODBlIiEjPSQiMWZ4IzMuLHBmIiEjPCQiMEJBMiUpKUc4OyEjOyQiMjBxOzFsdydIOyEjPSQiMjk8NjBZa2drIiEjPSQiMkJrMC9GX0NtIiEjPSQiMlY1Ky4zUyl5OyEjPSQiMl9kJT4hKnlBJnAiISM9JCIxWSEqMytkaDY8ISM8JCIxPE4pKjROK0c8ISM8JCIydyl6KCk+OFJXPCEjPSQiMidlQ3hIInoydyIhIz0kIjAkcG1ScDt4PCEjOyQiMjlSaCZcWmIkeiIhIz0kIjJCJ2VYZkQlKjQ9ISM9JCIxTC5OcC5MRT0hIzwkIjEvW0N6Ij1GJT0hIzwkIjJbRlIiKilmNWY9ISM9JCIyZHVMISp6JFx2PSEjPSQiMm1ARyozOyk9Kj0hIz0kIjIneUUjKT0lcCMzPiEjPSQiMiZccnJHc2xDPiEjPSQiMi9pNidRXS9UPiEjPSQiMjk0MSZbR1ZkPiEjPSQiMkJjKyVlMSNRKD4hIz0kIjJLLiZIbyUzLSo+ISM9JCIyTl0qPXlpZjE/ISM9JCIyZCdSMykzJSlILSMhIz0kIjJtVnl6Kj1QUj8hIz0kIjJzIUgoeXFmZDAjISM9JCIxeXR3PHY5cz8hIzwkIjFcPW1GYGApMyMhIzwkIjIvS2N2OEJcNSMhIz0kIjI4el11JTRKQEAhIz0kIjFgX01kKClwUEAhIzwkIjJNc1JzYyczYUAhIz0kIjJXPk1yUHUvPCMhIz0kIjJkbUdxPWlvPSMhIz0kIjJpOEJwKipcSz8jISM9JCIxMncibyF5aj5BISM8JCIyeTI3bmhEZ0IjISM9JCIyKFtsZ0VNVF9BISM9JCIyMSwsbEIsKW9BISM9JCIyOlsmUlkhKj0mRyMhIz0kIjJEJioqR2NvZCxCISM9JCIyTVUlPW1ZJ3pKIyEjPSQiMSUqKXlnWl9WTCMhIzwkIjFsTChmR1MyTiMhIzwkIjJpJHknZTRHck8jISM9JCIyeEhpZCFmXiRRIyEjPSQiMihvbmw6UCEqKlIjISM9JCIyJ1I3YkQ6SDtDISM9JCIyLXJYYUx6RVYjISM9JCIyOj1TYDluIVxDISM9JCIyQ2xNXyZcWGxDISM9JCIyTDdIXndVPVsjISM9JCIxJmVCXWRJIylcIyEjPCQiMmUwPVxRPVleIyEjPSQiMUZEIls+MTVgIyEjPCQiMSkqcHEvU1JaRCEjPCQiMXA5Zzk9eWpEISM8JCIwJWZcQydwLGUjISM7JCIwVCFSTXViJ2YjISM7JCIyRihbR1dfJUhoIyEjPSQiMVYkelQwTCRIRSEjPCQiMTlRMmszc1hFISM8JCIxJkdvUm4zQG0jISM8JCIyZXZpUVsnXHlFISM9JCIybkFkUEglKVtwIyEjPSQiMndwXk81czdyIyEjPSQiMWZoYTgqZndzIyEjPCQiMilIMVdCeC9XRiEjPSQiMjI1TkxgTi93IyEjPSQiMkJkSEtNQm94IyEjPSQiMkwvQ0o6Nkt6IyEjPSQiMk5ePUknKilmNEchIz0kIjJXKUgiSHgnKWYjRyEjPSQiMmpXMkdldUIlRyEjPSQiMTw+cSNSaShlRyEjPCQiMiMpUSdmLS06dkchIz0kIjIpZTNcNyFROipHISM9JCIyKEhgUUFlI3ohSCEjPSQiMSwpekFqOFYjSCEjPCQiMjtGdUBXLDIlSCEjPSQiMVYobz9EKjNkSCEjPCQiMlc/aj4xeE0oSCEjPSQiMmRuZD0oWycpKilIISM9JCIyajlfPG9faSskISM9JCIyc2hZO1xTRS0kISM9JCIydjNUOklHIVJJISM9JCIxZmJWNmhUYkkhIzwkIjIkSCtMQFIhPTIkISM9JCIxI1xDN3QiPikzJCEjPCQiMWkqPTZhelg1JCEjPCQiMUxNLF50JzQ3JCEjPCQiMS96ITQ7YnQ4JCEjPCQiMXZCITMoSHVgSiEjPCQiMVlvcCF5SSw8JCEjPCQiMTw4ZiFmPWw9JCEjPCQiMiV5ZFsrayFIPyQhIz0kIjFcLVE1VUg+SyEjPCQiMHN1LS0jb05LISM7JCIxIj5wLCQpcD9EJCEjPCQiMWlPMVN3WG9LISM8JCIxTCJlKlxhJVtHJCEjPCQiMS9FJilmS0IsTCEjPCQiMW1xdXA1aTxMISM8JCIxUDpreikzU0wkISM8JCIxMmdgKm8nUl1MISM8JCIxei9WKlwleW1MISM8JCIyJ1tcSzRCPCRRJCEjPSQiMjBVPiM+LGMqUiQhIz0kIjEiKlE2SHolZlQkISM8JCIxYCQzIVJkTEtNISM8JCIxQkchKltOc1tNISM8JCIyWEgoemU4NmxNISM9JCIxbDxwbyIqXCJbJCEjPCQiMmtCJ2V5cCl5XCQhIz0kIjEyMlspeXVVXiQhIzwkIjF5XlApZmkxYCQhIzwkIjFSJ3AjMy8wWk4hIzwkIjIvNmsiPSNRTWMkISM9JCIxI2VlIUdnIyl6TiEjPCQiMV9JJnokUUAnZiQhIzwkIjJPX1p5ayxFaCQhIz0kIjElKj51ZCUqKSpHTyEjPCQiMmFZT3dFeGBrJCEjPSQiMUY0YHhdd2hPISM8JCIyd1JEdSlHOnlPISM9JCIxcCk+dHBTWHAkISM8JCIyJVJWQDImRzRyJCEjPSQiMTYpM3JKO3RzJCEjPCQiMSJHLnE3L1B1JCEjPCQiMkV2KCpvJD40Z1AhIz0kIjE5QXpZKHpreCQhIzwkIjEmbydvY3YnR3okISM8JCIxYzZlbWBENFEhIzwkIjJtaXZrPFZjI1EhIz0kIjEpNHFqKTQuVVEhIzwkIjFwWEUnej0lZVEhIzwkIjAvZmhnMVsoUSEjOyQiMTZOMDtXPiIqUSEjPCQiMkUoeiVmQSNlMlIhIz0kIjFWQyVlLnFSI1IhIzwkIjJXInB0WHlOU1IhIz0kIjEmUUpjbFhuJlIhIzwkIjFiZV9sTTh0UiEjPCQiMUYuVXY3XyopUiEjPCQiMSl6OWAzNGYrJSEjPCQiMWYjNF8qb0hBUyEjPCQiMHQuXnElb1FTISM7JCIxLCMpKlxec10wJSEjPCQiMXNFKltLZzkyJSEjPCQiMVZyeU0iW3kzJSEjPCQiMTo7b1dmQi9UISM8JCIxJTN3WHZCMTclISM8JCIxWTBaazosUFQhIzwkIjE8XU91JCpSYFQhIzwkIjEqW2ZVPSh5cFQhIzwkIjInZVI6JSpcPCc9JSEjPSQiMjFWW1MhR2MtVSEjPSQiMjAhSCVSaF0qPVUhIz0kIjFzdCRRVVFgQiUhIzwkIjFMPXRMaXNeVSEjPCQiMllJRU8vOSJvVSEjPSQiMXYyX2A9XSVHJSEjPCQiMmtDOk1tKikzSSUhIz0kIjE8KDRMWnhzSiUhIzwkIjJ3PS9LR2xPTCUhIz0kIjFmJyk0JDRgK04lISM8JCIyMDckKkghNFdtViEjPSQiMSNmKClHckdHUSUhIzwkIjFpP3lBbEAqUiUhIzwkIjFMbG5LVmc6VyEjPCQiMk4rckQ5Iyo+ViUhIz0kIjJiWmxDJip6JFtXISM9JCIyYSUqZkJ3blpZJSEjPSQiMndTYUFkYjZbJSEjPSQiMXopW0BRVnZcJSEjPCQiME5WPz5KUl4lISM7JCIxQHkkPis+LmAlISM8JCIxIkhLPSJvcVlYISM8JCIxaG5zQFk0alghIzwkIjFMN2lKQ1t6WCEjPCQiMS5kXlQtKGVmJSEjPCQiMW0sVF4hZUFoJSEjPCQiMm1qLzgnZWtHWSEjPSQiMTIiKj5yTy5YWSEjPCQiMXlONCJbQDltJSEjPCQiMVwhKSk0SDR5biUhIzwkIjBfIykzNSg+JXAlISM7JCIxIipweDVcZTVaISM8JCIyRFhyMXNzcHMlISM9JCIyWCNmY0kwT1ZaISM9JCIyV1JnL01bKGZaISM9JCIxbFtOXWg4d1ohIzwkIjFPJFwtJ1JfI3olISM8JCIxMlE5cTwiKjNbISM8JCIxeSNRK2UqSERbISM8JCIwdUsqKlEob1RbISM7JCIxNnMjKSo+diFlWyEjPCQiMjpvQCg0SVl1WyEjPSQiMWBoaD4zJjMqWyEjPCQiMk1pNSZIJ1FzIVwhIz0kIjJZNDAlUmtpQlwhIz0kIjFsJipIXFUsU1whIzwkIjFGUz5mP1NjXCEjPCQiMnVcKTNwKSp5c1whIz0kIjFwSCkqeXc8KilcISM8JCIxUnUoKSlbbGIrJiEjPCQiMjAiPngpSGA+LSYhIz0kIjEjUW0nMzZNUV0hIzwkIjJDJjNjPSpHWjAmISM9JCIxOWBYR242cl0hIzwkIjEneVwkUVhdKDMmISM8JCIxY1VDW0IqUTUmISM8JCIxRyhRImUsRz9eISM8JCIxKT5MIW96bU9eISM8JCIxb3cjenhiSTomISM8JCIyJlJAI3llViVwXiEjPSQiMSxtcihSSmU9JiEjPCQiMkMyNnc/PkE/JiEjPSQiMVZiXTxxZz1fISM8JCIyTiwrdSNbKlxCJiEjPSQiMSZbJUhQRVFeXyEjPCQiMmEmKik9Wi94bl8hIz0kIjFGTTNkI2VURyYhIzwkIjEqKXkocDFZMEkmISM8JCIyJmZCKG8oUSRwSiYhIz0kIjFKb3cnb0BMTCYhIzwkIi84bSdcNChcYCEjOiQiMXNkYjF0NG1gISM8JCIxVi1YO15bI1EmISM8JCIxOVpNRUgoKSlSJiEjPCQiMXYiUml0Z19UJiEjPCQiMVpPOFkmWztWJiEjPCQiMT0iR2dOTyFbYSEjPCQiMiYpZUFmO0NXWSYhIz0kIjIlZXEiZSg+IjNbJiEjPSQiMi9gNmR5Kj4oXCYhIz0kIi4xY2YoZThiISM5JCIxcy9dMGEoKkhiISM8JCIyWCRcUjpLT1liISM9JCIxLyUqR0Q1dmliISM8JCIxdlE9TilRInpiISM8JCIyY015XWtFYmYmISM9JCIxPEcoXFg5PmgmISM8JCIxKkduW0UtJEdjISM8JCIxZjx3dStwV2MhIzwkIjBBY1kpeTJoYyEjOyQiMjtwXVhwbHVuJiEjPSQiMWleVy9OJlFwJiEjPCQiMk1qUlZKVC1yJiEjPSQiMS9UQkMiSG1zJiEjPCQiMXYmR1QkcCxWZCEjPCQiMVlJLVdaU2ZkISM8JCIxM3YiUmIjenZkISM8JCIxej4iUU8hPSN6JiEjPCQiMVxrcXQibyYzZSEjPCQiMT40ZyQpZiZcI2UhIzwkIjEjUiZcJHpWOCVlISM8JCIyQycpKlEuO3RkZSEjPSQiMUxWRzglPlQoZSEjPCQiMSV6eUpBMjAqZSEjPCQiMW1LMkxdKm8hZiEjPCQiMVB4J0glR0dCZiEjPCQiMTNBJ0dscSdSZiEjPCQiMXptdmklZWcmZiEjPCQiMidcNmxzaVdzZiEjPSQiMiY+Y2EjM00pKSlmISM9JCIxIjNTQyo9QTBnISM8JCIxX1hMLSg0Oy0nISM8JCIxQyFIQV4oKnouJyEjPCQiMSVcQkBLJlFhZyEjPCQiMWx6LEtKeHFnISM8JCIydVY3PiU0OygzJyEjPSQiMTNwIT12W041JyEjPCQiMXA4cWhsJCo+aCEjPCQiMiZSZWZyVktPaCEjPSQiMTYuXCI9N0Y6JyEjPCQiMSJ5JVEiKioqNHBoISM8JCIyRUR6NyF5WyY9JyEjPSQiMUNQPDZjKD0/JyEjPCQiMlg+bzVVaiM9aSEjPSQiMWxFJzRCXllCJyEjPCQiMUVyJjMvUjVEJyEjPCQiMSlmXjImb1VuaSEjPCQiMDJZMW05UUcnISM7JCIxUjBhcUM/K2ohIzwkIjAsTi9HIWY7aiEjOyQiMSNbSC40eUhMJyEjPCQiMV9SQStmT1xqISM8JCIxOSU9LHJgZE8nISM8JCIxJilHLD86OSNRJyEjPCQiMWN0ISpIJEgmKVInISM8JCIxRT0hKVJyIlxUJyEjPCQiMSlIJ3BcXElKayEjPCQiMXAyZmZGcFprISM8JCIwQyZbcDAza2shIzskIjEtKHokeiRvL1snISM8JCIxc1RGKj1jb1wnISM8JCIxVCdvIioqUkM4bCEjPCQiMTpKMTQ9akhsISM8JCIxJmVkKj0nPmdhJyEjPCQiMWM/JilHdVNpbCEjPCQiMUVsdVFfenlsISM8JCIxKik0a1tJPSZmJyEjPCQiMWVhYGUzZDZtISM8JCIxSCpIJW8nZXppJyEjPCQiMS1XS3lrTVdtISM8JCIxcyk9IylHTTJtJyEjPCQiMVVMNik0QXJuJyEjPCQiMTd5KzMqNE5wJyEjPCQiMXdBIXpyKCopNG4hIzwkIjFZbnpGYkdFbiEjPCQiMTw3cFBMblVuISM8JCIxKW8mZVo2MWZuISM8JCIxZSxbZCpbYXgnISM8JCIxSFlQbm4kPXonISM8JCIxLCJwc2RDIzNvISM8JCIxak47KFE3WSNvISM8JCIxTSFlcT4rNSVvISM8JCIxMUQmcCspUWRvISM8JCIxdnAlbyJleHRvISM8JCIxWDl1RU87ISpvISM8JCIxPGZqTzliMXAhIzwkIjEpUUlsQ1JII3AhIzwkIjFcW1VjcUtScCEjPCQiMUEkPmonW3JicCEjPCQiMSJ6OGluLUAocCEjPCQiMWojM2hbIVwpKXAhIzwkIjFMRisnSHlbKyghIzwkIjEwcyplNW03LSghIzwkIjF2O3o6UmxQcSEjPCQiMU9ob0Q8L2FxISM8JCIxMzFlTiZILzIoISM8JCIwM3ZhTTxvMyghIzskIjFcJnBgOjBLNSghIzwkIjAta18nSGY+ciEjOyQiMSNcZV54ISlmOCghIzwkIjFpSDAmZW9COighIzwkIjFMdSVcUmMob3IhIzwkIjElKj0lWz9XXj0oISM8JCIxbWp0OT9gLHMhIzwkIjFPM2pDKT56QCghIzwkIjEzYF9Nd0lNcyEjPCQiMXgoPldXJnBdcyEjPCQiMEQ5VkQkM25zISM7JCIwczNVMXJNRyghIzskIjEjPS5UKCllKSpIKCEjPCQiMV53KlJvWWlKKCEjPCQiMURAKlFcTUVMKCEjPCQiMSVmJ3kuQi1cdCEjPCQiMW01bzgsVGx0ISM8JCIxTmJkQnp6IlEoISM8JCIxNCtaTGQ9KVIoISM8JCIxb1dPVk5kOXUhIzwkIjAlKmVLTmg0VighIzskIjBUYEo7XHRXKCEjOyQiMSQpeS90cHRqdSEjPCQiMV9CJUh5QyxbKCEjPCQiMUNvJEdmN2xcKCEjPCQiMSVISkZTK0heKCEjPCQiMWRkaTcjKUdIdiEjPCQiMUYtX0Fnblh2ISM8JCIxKXA5QyRRMWl2ISM8JCIxbyI0QmteJXl2ISM8JCIway5BWFJbZighIzskIjE2Iik0aXNBNnchIzwkIjEiZSMqPjI6d2koISM8JCIxV3EpPSlHK1d3ISM8JCIxOTp5InAhUmd3ISM8JCIxJilmbiwmeW5uKCEjPCQiMWEvZDZqOyRwKCEjPCQiMUZcWUBUYjR4ISM8JCIxKVJmOCQ+JWZzKCEjPCQiMXBRRFQoSEJ1KCEjPCQiMExbNmI8KGV4ISM7JCIxLEcvaGA1dnghIzwkIjF0cyQ0PCRcInooISM8JCIxVjwkMyk0KXkheSEjPCQiMTppcyF6b1UjeSEjPCQiMSZvPzFnYzEleSEjPCQiMWFeXjVXL2R5ISM8JCIxRSc0L0FLTSh5ISM8JCIwNC8uLj8pKil5ISM7JCIxZiYpPlN5PzF6ISM8JCIwLiQ0XWNmQXohIzskIi92KSpmTSkqUXohIzokIjF1PikpcDdQYnohIzwkIjFWa3h6IWY8KHohIzwkIjE4NG4qKW85KSl6ISM8JCIxd2BjKnBNWCspISM8JCIxWSlmJTREIzQtKSEjPCQiMTxWTj4uSlAhKSEjPCQiMSp5WyNIIilwYCEpISM8JCIwRVYiUmYzcSEpISM7JCIwdFAhXFBaJzMpISM7JCIvQSQqZTonRzUpISM6JCIxam0jKW8kXCM+IikhIzwkIjFLNnN5cmpOIikhIzwkIjEwY2gpKVwtXyIpISM8JCIxdyteKXo3JW8iKSEjPCQiMVhYUzMxIVs9KSEjPCQiMTwhKkg9JSk9LCMpISM8JCIxKVskPkdpZDwjKSEjPCQiMVx6M1FTJ1JCKSEjPCQiMFUjKXolPU5dIykhIzskIjEkKm8oeWxSbkUpISM8JCIxaTh4bnU3JEcpISM8JCIxS2VteF9eKkgpISM8JCIxMS5jKDMuZkopISM8JCIxd1pYKCozSEskKSEjPCQiMVAjXHRxeSdbJCkhIzwkIjEzUEM8bDFsJCkhIzwkIjA9UXJLYTlRKSEjOyQiMVxFLlBAJXlSKSEjPCQiMDdGcCUqSFVUKSEjOyQiMSJmQG92PDFWKSEjPCQiMWlncm1iK1olKSEjPCQiMUMwaHdMUmolKSEjPCQiMScqXF0nPSJ5eiUpISM8JCIxbCUqUicqKm9oXCkhIzwkIjFPUkgxb2I3JikhIzwkIjEzJSk9O1klKkcmKSEjPCQiMXpHM0VDTFgmKSEjPCQiMVx0KGZCPzxjKSEjPCQiMTg9KGUvMyJ5JikhIzwkIjEjR21kJmVcJWYpISM8JCIxXjJtbE8pM2gpISM8JCIxQl9idjlGRicpISM8JCIxJnBcYUdmT2spISM8JCIxbVRNJjRaK20pISM8JCIxTidRXyFcVncnKSEjPCQiMSo0TF5yQUdwKSEjPCQiMW92LUQwQDQoKSEjPCQiMC9BXEwpZkQoKSEjOyQiMF47WzknKT51KSEjOyQiMSMpNHJhUlBlKCkhIzwkIjFfYWdrPHd1KCkhIzwkIjFDKipcdSZcNnopISM8JCIxJVIlUiVRUHYhKSkhIzwkIjFjKSlHJT5EUiMpKSEjPCQiMUZMPS9JSlMpKSEjPCQiMSp6eFMiM3FjKSkhIzwkIjFvQShSaSkzdCkpISM8JCIwdW1RVnclKikpKSEjOyQiMEBoUENrZSEqKSEjOyQiMSRvYk8wX0EjKikhIzwkIjFVLGJqKVInUSopISM8JCIxOllXdHctYiopISM8JCIxJjNSTFs6OSgqKSEjPCQiMWJOQiRILnkpKikhIzwkIjFGIUdKNSI+LyEqISM8JCIxKlxBSSIqeTAtKiEjPCQiMW9wIkhzbXAuKiEjPCQiMFY2R2BhTDAqISM7JCIxLmZxVUJ1cCEqISM8JCIxai5nXyw4JzMqISM8N2BqbCQiMSYpKlEoZl9xMyIqISM9JCIxNlolXF8hKkhGKiEjPSQiMFddLHp2c1YqISM8JCIxaWhOYjVjLCcqISM9JCIvPWM/aiVldyohIzskIjFEdncmZUosJCoqISM9JCIxRHQ0Jm9UJTQ1ISM8JCIyeSp5aDYtKGUtIiEjPSQiMixaUSJRKClIVTUhIz0kIjJIL2ZZRUYoZTUhIz0kIjJjaHo2emJeMiIhIz0kIjIjKT0reEolZSI0IiEjPSQiMjx2P1UlRywzNiEjPSQiMldLVDJQVFc3IiEjPSQiMm8qPUUoKilwMzkiISM9JCIyJnBDeUIlKUhkNiEjPSQiMkAvLi4mcHN0NiEjPSQiMlpoQm9aYiw+IiEjPSQiMnU9V0wrJWUxNyEjPSQiMjF2aylIRCxCNyEjPSQiMk5LJlFjNVdSNyEjPSQiMScqZSFIZXBlRCIhIzwkIjInb2tVNCIpSHM3ISM9JCIyOC9aZmpFKClHIiEjPSQiMlBobkM7Yl5JIiEjPSQiMms9KSkqKW8kZUA4ISM9JCIwdjNiQDchUTghIzskIjJGS0g/dVNXTiIhIz0kIjJhKilcJm8jcDNQIiEjPSQiMnlZcV16KEgoUSIhIz0kIjIvLyJmQGpzLjkhIz0kIjJKaDYiW1s6PzkhIz0kIjJlPUtZUCRlTzkhIz0kIjIjXEY6LD4sYDkhIz0kIjI8S3R3VVMlcDkhIz0kIjJUKlE+YSpvZVsiISM9JCIycFk5MlsoSC06ISM9JCIwL05zK0UoPTohIzskIjJCaGJQYGFeYCIhIz0kIjJcPXctMSRlXjohIz0kIjIlW256J2U2IW86ISM9JCIyMUs8TDZTV2UiISM9JCIxJSp5JClSJ28zZyIhIzwkIjFtJWVqOyhIPDshIzwkIjFSIXpHcERQaiIhIzwkIjI3aCpSPlU6XTshIz0kIjJQPT9mdSNlbTshIz0kIjJ3dVNDRjZJbyIhIz0kIjItS2gqKXpSJSpwIiEjPSQiMkYqPVtEJG9lciIhIz0kIjJgWS0/Jm9ISzwhIz0kIjFRSV95YHNbPCEjPCQiMi9oVl0hUjpsPCEjPSQiMkw9azpWI2UieSIhIz0kIjFaWjNlNCwpeiIhIzwkIjIlPmBnJVtSVyI9ISM9JCIyOyplNzYhbzMkPSEjPSQiMWtra1BsSFo9ISM8JCIydS5uVDFEUCc9ISM9JCIyJzR3byFmYCwpPSEjPSQiMkQ9M3M2I2UnKj0hIz0kIjJkdUdQazVJIj4hIz0kIjInPSRcLTxSJUg+ISM9JCIyOiopcG5wbmUlPiEjPSQiMlBZIUhCaUhpPiEjPSQiMU81IilcWnN5PiEjPCQiMTQ7THdLOiYqPiEjPCQiMjk9X0chPWU2PyEjPSQiMVhGUEguLEc/ISM8JCIxPUwqZSYpUVcvIyEjPCQiMCpRVCNRbjMxIyEjOyQiMWpXJCozZkh4PyEjPCQiMmIuYmFWQ1A0IyEjPSQiMiUzYyg+J0g6NUAhIz0kIjIxPSdcKVsiZUVAISM9JCIxV24sOissVkAhIzwkIjJrSlA6YVElZkAhIz0kIjIkKil5MG9xJ2U8IyEjPSQiMWkleVhmJkgjPiMhIzwkIjJaLio0QFRzM0EhIz0kIjJ0Zz53a19eQSMhIz0kIjA9U1Q8ImVUQSEjOyQiMkZ2ZzFxNCFlQSEjPSQiMmpKIj1GI1FXRiMhIz0kIjEqKT1xYG4nM0gjISM8JCIxaENBIUcmSDJCISM8JCIyTy5WbiFRc0JCISM9JCIxMU9FTEI6U0IhIzwkIjIoeVR5ZjNlY0IhIz0kIjFfWkknUTRJUCMhIzwkIjE6YCNHInpWKlEjISM8JCIyeCllTVJrJ2VTIyEjPSQiMi5ZbWUnXEhBQyEjPSQiMUxxUSNcQihRQyEjPCQiMmFnMio9PzpiQyEjPSQiMiR5IkdhYSFlckMhIz0kIjIwdls+MjQhKVsjISM9JCIxOSRwJSlmUFddIyEjPCQiMSgpKSopXDdtM18jISM8JCIyKWYvXl5ZSFBEISM9JCIyQy5KIXlKc2BEISM9JCIxMDtiLzw6cUQhIzwkIjF4QDJKLWUnZSMhIzwkIjIvdiNmZCgzSWcjISM9JCIyT0o4VEdQJT5FISM9JCIxJylRajVlJ2VqIyEjPCQiMihlVzpQVkhfRSEjPSQiMUpdbmpHc29FISM8JCIxL2M+IVJeXm8jISM8JCIyazw7biIqejpxIyEjPSQiMidcbkJWJTMhPUYhIz0kIjJESmQocHBWTUYhIz0kIjJhKXlGJ1xsM3YjISM9JCIxZSUpekFTSG5GISM8JCIyMy4+JFxEcyR5IyEjPSQiMk1nUmUyXiwhRyEjPSQiMXcsTy0nemwiRyEjPCQiMVsyKSlHIjNJJEchIzwkIjI8SixhbE8lXEchIz0kIjJVKT0jPj1sZSdHISM9JCIxZENXM1BIIylHISM8JCIyKEhJJ1xCQSgpKkchIz0kIjJBZyRbaDI6OkghIz0kIjF2VCspR3o6JEghIzwkIjFaWl85eStbSCEjPCQiMEtYNU1PVydIISM7JCIyTillY25bJzMpSCEjPSQiMm5YJzMlUiRIKCpIISM9JCIxSHFnPz5zOEkhIzwkIjI6Z0ZyV10sLiQhIz0kIjF1IltPKCp5bC8kISM8JCIxWihvLF0ySTEkISM8JCIyJj4kKm9FZ1Z6SSEjPSQiMk0pKTRLYmtlNCQhIz0kIjJfWEkoeklIN0ohIz0kIjFHNUQxO3NHSiEjPCQiLzt4Syw6WEohIzokIjF1QEhmJ3k6OyQhIzwkIjJsdTdlPTIheUohIz0kIjIlPUxMN2RWJT4kISM9JCIxIylRJilRVSczQCQhIzwkIjJXWHVgdyNIRkshIz0kIjFGXSo9SEBQQyQhIzwkIjInKmY6JT0pXCxFJCEjPSQiMXRoJFxNeWxGJCEjPCQiMVhuWHJvKyRIJCEjPCQiMT10KHpSTiU0TCEjPCQiMSIpeVxDUidlSyQhIzwkIjFiJT01WCNIVUwhIzwkIjJtLVJ2KDRzZUwhIz0kIjEqZmZTXVxeUCQhIzwkIjFyLGVJIXk6UiQhIzwkIjFXMjVkbCszTSEjPCQiMnZKQE8zTldVJCEjPSQiMCk9OTVPJzNXJCEjOyQiMWBDbU9ASGRNISM8JCIyYS0kPWoxc3RNISM9JCIxKWYuKCo9XCxcJCEjPCQiMjE8Q2lyeGxdJCEjPSQiMVdadVVpK0JOISM8JCIya0psI3BaVlJOISM9JCIxemV5JkhqZWIkISM8JCIyRFgxQiM9SHNOISM9JCIxRHEjKVsucyllJCEjPCQiMndmWmAoKVteZyQhIz0kIjA8bz1TeDppJCEjOyQiMVYoKVFHZitRTyEjPCQiMTokNFxYTVdsJCEjPCQiMXopSDkpSCczbiQhIzwkIjFfLyZ6XSJIKG8kISM8JCIxQzVaTStzLlAhIzwkIjJrZiIqNGNbLHMkISM9JCIxb0BeKDN4bHQkISM8JCIxVUYuOWMrYFAhIzwkIjE6TGJTVFZwUCEjPCQiMXlRMm5FJ2V5JCEjPCQiMFglZiQ+IkgtUSEjOyQiMk0tOixzPig9USEjPSQiMSZmTm1DW14kUSEjPCQiMW9oOnRuZF5RISM8JCIxVW5uKkgwIW9RISM8JCIxOXQ+RVFWJSlRISM8JCIxJyl5cl9CJzMhUiEjPCQiMVwlUSN6M0g8UiEjPCQiMUIhZmRTPlAkUiEjPCQiMSZmekEkejldUiEjPCQiMW8sISlla2RtUiEjPCQiMHU/YClcKyQpUiEjOyQiMkRKVD1eTCUqKlIhIz0kIjEnKT1PUT8nZSwlISM8JCIyJ1tDKVtjIUhLUyEjPSQiMUBJUyI0PihbUyEjPCQiMldmQnpoWl4xJSEjPSQiMW1UV1doZCIzJSEjPCQiMVJaJzRuLyEpNCUhIzwkIjE4YFsoPkxXNiUhIzwkIjEmKWUrQzwnMzglISM8JCIxW2tfXS1IWlQhIzwkIjFAcS94KD1QOyUhIzwkIjEkZm5OSVosPSUhIzwkIjFtIikzSWVkJz4lISM8JCIyJVEoM21OL0lAJSEjPSQiMTYkSEopR1ZIVSEjPCQiMk4pKVwnNDknZUMlISM9JCIxWi88TyoqR2lVISM8JCIyJz41cGklPSh5VSEjPSQiMSRmNiMqKXA5JkglISM8JCIyYTtLZF52OkolISM9JCIxUEZEVVMrR1YhIzwkIjBKdChvRFZXViEjOyQiMSQpUUgmNGgzTyUhIzwkIjJtVzk9aSpHeFYhIz0kIjImPV1MWyI9UFIlISM9JCIxI2ZiW25ZLFQlISM8JCIyTzt3OD92bFUlISM9JCIxUG4qeXMuSVclISM8JCIyJTR0VGFBVmZXISM9JCIxJCl5JDR5Z2VaJSEjPCQiMmJXZXVJKkcjXCUhIz0kIjE9IXpSJHlyM1ghIzwkIjEiZipcZ2o5RFghIzwkIjFqLC0oKVtkVFghIzwkIjJrdFNOVC4hZVghIz0kIjEzODFTPlZ1WCEjPCQiMjopPWVtLyczZiUhIz0kIjJNWC1KKiopRzJZISM9JCIydyxCJz52ckJZISM9JCIyJiplVmgvWSxrJSEjPSQiMWpUbXNYZGNZISM8JCIxTlo9KjQuSW4lISM8JCIxMmBxRDtWKm8lISM8JCIxIillQV8sJ2VxJSEjPCQiMWBrdXknKUdBWiEjPCQiMmwsbl8/PChRWiEjPSQiMSplKHlKZDliWiEjPCQiMWkiMyRlVWRyWiEjPCQiMU0oR1t5LSEpeSUhIzwkIjEyJFw4SkpXIVshIzwkIjF6KXB5JClmMyNbISM8JCIyRFghUmskKUdQWyEjPSQiMmEsNjQqb3JgWyEjPSQiMSllSnVUWCwoWyEjPCQiMWhAJlIlUmQnKVshIzwkIjFNRlpxQysuXCEjPCQiMTFMKnAqNFY+XCEjPCQiMXpRXkImZmUkXCEjPCQiMjlYTSswKUdfXCEjPSQiMTpdYndscm9cISM8JCIydmV2STVYXilcISM9JCIxaGhmSE9kLF0hIzwkIjJFdDtoOi0hPV0hIz0kIjEwdGojb0lXLiYhIzwkIjF5eTo0I2YzMCYhIzwkIjBYeWN0KEduXSEjOyQiMTghKj5paXIkMyYhIzwkIjEoZT4oKXlXLDUmISM8JCIxZixDOkxkO14hIzwkIjFLMndUPStMXiEjPCQiMmFJIkdvLlZcXiEjPSQiMXg9IVsqKWVlOyYhIzwkIjBYQThVKEcjPSYhIzskIjJNLFZ5JWZyKT4mISM9JCIxJ2VqVlpXXkAmISM8JCIxZVQpMyt0OkImISM8JCIxSlpTRjorW18hIzwkIjEuYCNSMElXRSYhIzwkIjF4ZVchZWUzRyYhIzwkIjFcaydwNShHKEgmISM8JCIxOHFbTGNyOGAhIzwkIjEmZTIrO1csTCYhIzwkIjFlIkdsb3NsTSYhIzwkIjB0W0lALElPJiEjOyQiMkRJcCZSKEglemAhIz0kIjF3KSozbSNlZVImISM8JCIyd1c1RXonRzdhISM9JCIxNzU4PmByR2EhIzwkIjElZV5jJVE5WGEhIzwkIjJ3OnNAUHM6WSYhIz0kIjImSEZwKSozK3lhISM9JCIyOUk4X1VIV1wmISM9JCIyWShRdF56JjNeJiEjPSQiMVtXRHlrR0ZiISM8JCIyLy12Wis6UGEmISM9JCIxJGUmSEpOOWdiISM8JCIybDo7eTBzbGQmISM9JCIyJUduTCVlK0lmJiEjPSQiMjtJZDM2SCU0YyEjPSQiMk4oeVBQdyZlaSYhIz0kIjFZJSkqUTsnR1VjISM8JCIxPiE+L3A5KGVjISM8JCIxI2VScEBWXm4mISM8JCIyYTpnTXVyOnAmISM9JCIxRjIpKnAtKzNkISM8JCIxLDhdJ3pHV3MmISM8JCIxdD0tQnQmM3UmISM8JCIxWUNhXGVHZGQhIzwkIjE9STF3VnJ0ZCEjPCQiMkNlJGUtSDkheiYhIz0kIjFiVDVIOWQxZSEjPCQiMUZaaWIqKipII2UhIzwkIjEqSFhAW0clUmUhIzwkIjFzZW0zcSZlJmUhIzwkIjFYaz1OYkdzZSEjPCQiMTxxcWhTcikpZSEjPCQiMjFlRiMpZVVeIWYhIz0kIjFhIltaNnI6I2YhIzwkIjFGKG83ayoqeiRmISM8JCIxKkgqeW4iR1cmZiEjPCQiMjooKTRWcGMzKGYhIz0kIjFYLyQzQSZHKClmISM8JCIybSxedHU4UCsnISM9JCIyJXo6KFFGVSwtJyEjPSQiMV5AUiszZE9nISM8JCIxRUYicEsqKkgwJyEjPCQiMSlITE0meVVwZyEjPCQiMi8oUSYqemomZTMnISM9JCIyT1d1ayFcRy1oISM9JCIyYiwmKkhWOCg9aCEjPSQiMGU6JmY+OU5oISM7JCIyOzpPZ1txOjonISM9JCIyYnNjRCwqKno7JyEjPSQiMnVIeCFSdlUlPSchIz0kIjFweWZsZyYzPychIzwkIjFWJT1AZiVHPGkhIzwkIjE6IVInPUpyTGkhIzwkIjEpZWZea1QsRCchIzwkIjFeLG9yLGRtaSEjPCQiMUIyPylwKSpIRychIzwkIjEnSEBaQUYlKkgnISM8JCIxbz1DXmQmZUonISM8JCIxVEN3eFVHS2ohIzwkIjE6SUcvR3JbaiEjPCQiMSdlLjNMVF5PJyEjPCQiMDpDdCYpcDpRJyEjOyQiMUFaJVFRKSp6UichIzwkIjEnSGwuInBVOWshIzwkIjFvZSlvVmIzVichIzwkIjBXMU0nUkdaayEjOyQiMThxIyoqWzdQWSchIzwkIjEmZVprLFQsWychIzwkIjA6b0hhcGxcJyEjOyQiMUEoKVtwISkqSF4nISM8JCIxJUg0Z2ZFJUhsISM8JCIxbilIRDdiZWEnISM8JCIxUi8wXE9HaWwhIzwkIjE2NWR2QHJ5bCEjPCQiMSdlIjQtMjkmZichIzwkIjFcQGhHI3A6aCchIzwkIjFARjhieCp6aSchIzwkIjEkSGA7R0VXaychIzwkIjFuUTwzWyYzbSchIzwkIjBXJXBNTEd4bSEjOyQiMTZdQGg9ciRwJyEjPCQiMSRlTnhRUyxyJyEjPCQiMVtoRDkqb2xzJyEjPCQiMHN3MlcoKkh1JyEjOyQiMSRIKEhuZlVmbiEjPCQiMWx5IlFcYWV4JyEjPCQiMVElUS4tJEcjeichIzwkIjAsZm9hNigzbyEjOyQiMSNlekwyU14jbyEjPCQiMVgsISoqZm86JW8hIzwkIjE+MlVFcip6Jm8hIzwkIjEkSFRIbERXKG8hIzwkIjFsPVl6VCYzKm8hIzwkIjFRQylmcSNHMnAhIzwkIjAsLkRCNlAjcCEjOyQiMSNlQiFmKFIsJXAhIzwkIjFZVGEmR29sJnAhIzwkIjE+WjE3bypIKHAhIzwkIjEjSCZlUWBVKilwISM8JCIxa2U1bFEmZSsoISM8JCIxT2tpIlIjR0FxISM8JCIxNHE5PTRyUXEhIzwkIjEjZW5ZV1JeMCghIzwkIjFYIik9cnpjcnEhIzwkIjE9KDN4XCcqejMoISM8JCIxJEhIVS1EVzUoISM8JCIxaylcMmJgMzcoISM8JCIxTy9GeD9HUHIhIzwkIjEzNXouMXJgciEjPCQiMSJlNi44Uiw8KCEjPCQiMWBAJG9sbmw9KCEjPCQiMT1GTiQ9JypIPyghIzwkIjBIdCk0WlU+cyEjOyQiMWlRUk9LJmVCKCEjPCQiMU1XIkh3IkdfcyEjPCQiMTJdVipHNShvcyEjPCQiMSNlYmYiKVFeRyghIzwkIjFgaFpVdGMsdCEjPCQiMTxuKipvZSp6SighIzwkIjEqRzxiUkNXTCghIzwkIjFpeS5BSCYzTighIzwkIjFNJWUmWzlHbnQhIzwkIjEyIXpdKCo0UFEoISM8JCIxeiYqZiwmUSxTKCEjPCQiMV8sN0dxYzt1ISM8JCIxOzJrYWIqSFYoISM8JCIxKUdoNjNDJVx1ISM8JCIwJz1vMkUmZVkoISM7JCIxTEM/TTZHI1soISM8JCIxMUlzZyc0KClcKCEjPCQiMXlOQyg9UV5eKCEjPCQiMWBUdzhuY0p2ISM8JCIxOlpHU18qemEoISM8JCIxKEcwb3dCV2MoISM8JCIxZWVLJEhfM2UoISM8JCIxS2slKT4zRyhmKCEjPCQiMTFxT1kkNFBoKCEjPCQiMXl2KUcoeThJdyEjPCQiMDozJSpSbWxrKCEjOyQiMTooR2YjXCpIbSghIzwkIjEoR1xDWEIlenchIzwkIjFmKXAqeT4mZXAoISM8JCIxSy9cMDBHN3ghIzwkIjEwNSxLITQoR3ghIzwkIjF4OmBldjhYeCEjPCQiMVxAMCYzbTp3KCEjPCQiMTdGZDZZKnp4KCEjPCQiMSdHJDRRSlUleighIzwkIjFlUWhrOyYzInkhIzwkIjFKVzgiPiFHRnkhIzwkIjEvXWw8KDNQJXkhIzwkIjF3YjxXczhneSEjPCQiMVtocHFkY3d5ISM8JCIxQG5AKEglKkgqeSEjPCQiMSdHUFAjR1U0eiEjPCQiMWV5RF04JmUjeiEjPCQiMFZ5bigpekEleiEjOyQiMS0hKkguJTMoZXohIzwkIjF2Jj4pSHA4dnohIzwkIjFaLE1jYWMiKnohIzwkIjBzZ0cpUip6KykhIzskIjEkRyJRNERVQyEpISM8JCIxZD0hZi5eMy8pISM8JCIxSENVaSZ6czApISM8JCIuViopMzNQMikhIzkkIjF2Tlk6bTghNCkhIzwkIjFaVCk+OWxsNSkhIzwkIjBzLyZvTypINykhIzskIjEjR0RdPkElUiIpISM8JCIxY2VhQDImZTopISM8JCIxSGsxWyN6QTwpISM8JCIxLHFldXhxKT0pISM8JCIxdHY1LGo4MCMpISM8JCIxWSJHdyNbY0AjKSEjPCQiMT4oW1ROJCp6QikhIzwkIjEiR3AxKT1VYSMpISM8JCIxYSkqPTIvJjNGKSEjPCQiMUcvckwqeXNHKSEjPCQiLkotWTJQSSkhIzkkIjFyOnYnKWY4PyQpISM8JCIxWUBGOFhjTyQpISM8JCIxPUZ6UkkqSE4pISM8JCIxJEc4amNAJXAkKSEjPCQiMWJRJEc0XWVRKSEjPCQiMUZXTj4neUFTKSEjPCQiLnZlOTIoPSUpISM5JCIxc2JSc2M4TiUpISM8JCIxWGgiKik+azpYKSEjPCQiMTxuVkRGKnpZKSEjPCQiMSNHZD5EQFdbKSEjPCQiMWF5WnkoXDNdKSEjPCQiMUQlKSpcSXlzXikhIzwkIjEqKio9OiRvcUwmKSEjPCQiMGRSIWVgOF0mKSEjOyQiMVcsYyUpUWNtJikhIzwkIjE7MjM2QypIZSkhIzwkIjBHLHckNFUqZikhIzskIjFfPTdrJVxlaCkhIzwkIjFDQ2shKnpGSycpISM8JCIxJypIOzxscVsnKSEjPCQiMXJOb1ZdOGwnKSEjPCQiMVZUP3FOYyJvKSEjPCQiMTpacyc0Iyp6cCkhIzwkIjBHWEtpP1dyKSEjOyQiMV5ld1wiXDN0KSEjPCQiMUJrR3d3RlooKSEjPCQiMSYqcCFHPzFQdykhIzwkIjFydktIWjgheSkhIzwkIjFWIltlRGpseikhIzwkIjE6KG9CeSIqSCIpKSEjPCQiMShHKikpMy5VSCkpISM8JCIxXyk0YSQpW2UlKSkhIzwkIjFCLyQ+T3hBJykpISM8JCIxKCo0WCkpZXF5KSkhIzwkIjFwOihcVE1eKikpISM8JCIxVUBcVEhjNiopISM8JCIxOUYsbzkqeiMqKSEjPCQiMSdHTFgqKj5XJSopISM8JCIxXFEwQCZbMycqKSEjPCQiMUFXZFpxRngqKSEjPCQiMScqXDR1YnEkKiopISM8JCIxbmJoK1Q4NSEqISM8JCIxVWg4RkVjRSEqISM8JCIxOW5sYDYqSC8qISM8JCIxJ0d4LG8+JWYhKiEjPCQiMVt5cDEjW2UyKiEjPCQiMUIlPUt0d0E0KiEjPCQiMSYpKlEoZl9xMyIqISM8N2BqbCQiMWtEJXlBKXlIIiohIz0kIjFCPylwdWBXSCohIz0kIjEiW0BoRT4iZiUqISM9JCIwJTRFJnkleUInKiEjPCQiMTEuUy8uWCl5KiEjPSQiMWooUk4jZTZgKiohIz0kIjJAI3pFTSJ5PCwiISM9JCIxbz09J29XI0c1ISM8JCIyTyJlNFE3clc1ISM9JCIyJmYoNCt6eDYxIiEjPSQiMmJxQj5NV3cyIiEjPSQiMjdsUFEqMzYlNCIhIz0kIjJ5ZV5kV3gwNiIhIz0kIjJOYGx3KlIvRjYhIz0kIjIkeiV6JlwwXlY2ISM9JCIyX1UkXCxyKCpmNiEjPSQiMXJ0U2BPV3c2ISM8JCIybkpAYD81SD4iISM9JCIyRkVOc3Z3JDQ3ISM9JCIyIyo+XCI0TCVlQSIhIz0kIjFYSjFoKTRCQyIhIzwkIjI0NHhIVHcoZTchIz0kIjJuLiIqWydIQ3Y3ISM9JCIyQylcIW9eNDxIIiEjPSQiMiVHKj0ob2c8MzghIz0kIjF1R2o/RWtDOCEjPCQiMjIib2FzIjQ2TSIhIz0kIjJrdmdXc3Z2TiIhIz0kIjJDcXVqRlVTUCIhIz0kIjIkWycpR0cpMzBSIiEjPSQiMSVmLS1RdnBTIiEjPCQiMGE7QCQ+V0I5ISM7JCIyY1tJU1szKlI5ISM9JCIyQFVXZi52algiISM9JCIxbyRleWVUR1oiISM8JCIxOUJ4UiIzJCpbIiEjPCQiMihmaW8icHVkXSIhIz0kIjJkPytPQ1RBXyIhIz0kIjI4OjliejIoUTohIz0kIjJvNEd1TXVeYiIhIz0kIjJQLlUkKioza3I6ISM9JCIyJnpmRF51NSllIiEjPSQiMmEjKnBKK3VYZyIhIz0kIjI7KFEzYjAvQDshIz0kIjE8eSpwNTJ2aiIhIzwkIjJFdzYqZU8oUmwiISM9JCIyKDNkIzNAUy9uIiEjPSQiMl9rUkZ3MXBvIiEjPSQiMSJmYFlKdExxIiEjPCQiMnRgbmwnKVIpPjwhIz0kIjJHWyJbPWtJTzwhIz0kIjIkR2FScUh4XzwhIz0kIjF1JDRCX1IjcDwhIzwkIjIuS0JVMjFkeSIhIz0kIjJvRFBoaXNAIT0hIz0kIjJCP14heSJSJz09ISM9JCIyJlteJypIZDVOPSEjPSQiMSU0ej1HczomPSEjPCQiMC8kekwpUSFvPSEjOyQiMmQpcHEmUTBYKT0hIz0kIjI6JDRpUD4oNCE+ISM9JCIxb1tgKltRdSI+ISM8JCIxOSlbOS8wUiQ+ISM8JCIwd2lMZnIuJj4hIzskIjExbkZYIlFvJz4hIzwkIjI5bCE+KHAvTCk+ISM9JCIyc2YvIlw3eCoqPiEjPSQiMVYmPTUheUI7PyEjPCQiMFtLSE4vRi4jISM7JCIyZFVZWyE0PFw/ISM9JCIyN1BnblhQYzEjISM9JCIxPFZuM1M1IzMjISM8JCIxaiMpZWcwZCk0IyEjPCQiMTRBXTdyLjpAISM8JCIyWTo7V20uOjgjISM9JCIyOTRJakBxejkjISM9JCIybS5XI29uVmtAISM9JCIyRyl6Oj9MITQ9IyEjPSQiMidHPjJzKXB0PiMhIz0kIjJbKGUpUlVPUUAjISM9JCIyLiMpKiplKEhJSUEhIz0kIjFtUCJ5X3BuQyMhIzwkIjI8ckYoemdCakEhIz0kIjIpWztrSkVxekEhIz0kIjJaZmJOPXBoSCMhIz0kIjIpUiZwYXRORUojISM9JCIxJ1skUShHLSJIQiEjPCQiMUt1SFIpb2JNIyEjPCQiMnVQNjdSTj9PIyEjPSQiMktLREolPl15QiEjPSQiMi9FUl1cb1xSIyEjPSQiMmI/YHAvTjlUIyEjPSQiMjk6bikpZix6VSMhIz0kIjJ3NCJ5XSJvVlcjISM9JCIyTS8mcC1aJDNZIyEjPSQiMSopKjNZRCx0WiMhIzwkIjFOSF8xeXckXCMhIzwkIjI7KG9WZVZCNUQhIz0kIjE8M041NHFFRCEjPCQiMkx3a0FZbkphIyEjPSQiMikzKHlULE0nZkQhIz0kIjJZbCM0bTA1d0QhIz0kIjIzZzEhPXJjI2YjISM9JCIyamE/KnBPLjRFISM9JCIxJFtNPUErYmkjISM8JCIyJEglW1B4bT5rIyEjPSQiMltQaWNLTCVlRSEjPSQiMEt3digpKipbbiMhIzskIjFtLVxIa08icCMhIzwkIjE3VVMiKUgkeXEjISM8JCIydjo9TGAqSENGISM9JCIxJTRLXzNtMnUjISM8JCIyLS9ZcmpLc3YjISM9JCIxJykqZiEqPSpwdEYhIzwkIjJBJFIoNHVsLHojISM9JCIyeCh5KUdIS20hRyEjPSQiMk8jPSFbJSkpNEJHISM9JCIxcGRyJ1JsJlJHISM8JCIyaXFIJ1s+LmNHISM9JCIyPGxWMF0pXHNHISM9JCIyd2ZkQzBsKikpRyEjPSQiMVY6UC87VjBIISM8JCIxKlsmR2MiKSo9I0ghIzwkIjFOJSo+M1pPUUghIzwkIjIxUTgsRUpbJkghIz0kIjJsS0Y/InlIckghIz0kIjFqNyVST2t4KUghIzwkIjImNF8mZSI0Qi9JISM9JCIxYiJweFkocD9JISM8JCIyMDUkbz5TO1BJISM9JCIybi8oZnIwamBJISM9JCIyRCo0XkJyNHFJISM9JCIxUVxVdk9jJzMkISM8JCIyXygpUXRBSUk1JCEjPSQiMjIjR0R6blw+SiEjPSQiMW5uO0pMJ2Y4JCEjPCQiMTcyMyQpKUhDOiQhIzwkIjFlWSpcVicqKW9KISM8JCIxLyczcClITyY9JCEjPCQiMidcRCMpUSZIPT8kISM9JCIxJ1tPMjQnSD1LISM8JCIxSy9sVUV3TUshIzwkIjF5VmMlPkg3RCQhIzwkIjFCJHlrdSZwbkshIzwkIjIlcEFSKUhpVEckISM9JCIyY0AxLiYpRzFJJCEjPSQiMWgsQS1hNDxMISM8JCIydzRNVCY+Y0xMISM9JCIxVyFbZ11HK04kISM8JCIxKik+J3owJlxtTCEjPCQiMU5mKCk0OydIUSQhIzwkIjEiKSkqeWgiRyUqUiQhIzwkIjFGUXE4WiplVCQhIzwkIjF0eGhsN09LTSEjPCQiMTQ8YDx5IylbTSEjPCQiMllsWCVwVkhsTSEjPSQiMSwnZjgjNHciWyQhIzwkIjFZTkZ0dUEpXCQhIzwkIjJEXCg9RFNwOU4hIz0kIjFSOTV4MDtKTiEjPCQiMSVROiFIcmlaTiEjPCQiMUAkSDRvJDRrTiEjPCQiMW1LJUdCZzBlJCEjPCQiMThzdiV5RXFmJCEjPCQiMWU2bk9MXDhPISM8JCIxL15lKSkpZipITyEjPCQiMDAqXFNrVVlPISM7
[truncated: 5,185,218 more chars]
