# Supplementary material for: Development of a Material Design Space for 4D-Printed Bio-Inspired Hygroscopically Actuated Bilayer Structures with Unequal Effective Layer Widths
Source: Biomimetics (Basel). 2021 Oct 6;6(4):58. doi: 10.3390/biomimetics6040058 (PMC8544213; doi:10.3390/biomimetics6040058)
Supplement: Supplementary file 1 [file biomimetics-06-00058-s001.zip › Krueger_Thierer_et_al/Raw_Values_Bilayers_A.xlsx]

## Sheet: Deflection
	Deflection [mm] - measured in wet state
Experiment A	Bilayer						Monolayer active Material						Monolayer passive Material
Sample	A1	A2	A3	A4	A5		A1	A2	A3	A4	A5		A1	A2	A3	A4	A5
	29.605	19.705	9.065	4.49	5.905		73.115	55.515	32.115	32.685	20.365		11.12	11.365	8.715	13.93	8.715
	33.095	24.2	3.41	4.24	3.615		67.735	56.175	36.66	23.115	16.2		9.095	11.655	10.515	12.98	9.95
	29.525	19.375	5.82	4.115	2.245		70.765	53.335	29.84	34.48	17.81		11.18	11.75	12.32	11.845	13.545
	26.86	21.04	9.235	3.825	6.405		71.905	54.85	35.525	17.525	24.345		10.135	9.945	9.095	10.42	11.275
	32.6	21.87	7.82	1.5	3.825		69.25	59.585	37.325	17.62	21.88		10.14	10.425	10.515	11.655	10.14
	36.925	18.085	9.565	3.16	5.82		67.815	62.335	39.405	17.62	19.985		9.185	8.905	10.895	11.845	8.905
	39.25	20.955	8.07	1.41	5.475		69.535	63.66	32.21	19.135	20.935		8.24	9.85	13.165	9.95	10.8
Median	32.6	20.955	8.07	3.825	5.475		69.535	56.175	35.525	19.135	20.365		10.135	10.425	10.515	11.845	10.14

## Sheet: Curvature
	Curvature (mm^-1) - measured in humid and dry state
Experiment A	Bilayer humid						Bilayer dry
	A1	A2	A3	A4	A5		A1	A2	A3	A4	A5
	0.0417	0.0394	0.0355	0.0286	0.0299		0.0581	0.0571	0.0453	0.0391	0.0379
	0.0238	0.0468	0.0317	0.0294	0.0244		0.0564	0.056	0.042	0.0383	0.0337
	0.037	0.0315	0.0271	0.0284	0.0217		0.0594	0.0451	0.0387	0.0392	0.0316
	0.0465	0.0429	0.0309	0.0253	0.0254		0.0613	0.0538	0.0422	0.0352	0.0339
	0.0396	0.0418	0.0308	0.0211	0.023		0.0462	0.0532	0.0416	0.031	0.032
	0.0335	0.0375	0.0324	0.0298	0.025		0.044	0.047	0.0441	0.0385	0.0343
	0.0197	0.0414	0.034	0.0233	0.0244		0.0469	0.0512	0.0429	0.0322	0.0332
Median	0.037	0.041	0.032	0.028	0.024		0.056	0.053	0.042	0.038	0.034

## Sheet: Layer Length
	Length (mm) - measured in all states
Experiment A	Monolayer active Material wet						Monolayer active Material humid - Length						Monolayer active Material dry - Length
	A1	A2	A3	A4	A5		A1	A2	A3	A4	A5		A1	A2	A3	A4	A5
	75.96	75.96	75.44	75.72	75.5		74.09	74.15	74.12	74.02	73.83		73.45	73.22	73.22	73.19	72.97
	75.8	75.83	75.99	75.49	75.35		73.72	74.07	73.78	73.64	73.74		73.32	73.3	73.09	73.02	72.92
	75.34	76.15	75.89	75.93	76.19		73.98	74.42	74.26	74.21	74.22		73.47	73.73	73.36	73.45	73.38
	75.68	75.7	75.9	75.66	75.69		73.92	74.2	73.96	74.01	73.85		73.39	73.23	73.37	73.24	73.13
	75.99	75.69	76	76.07	75.92		73.4	73.68	74.2	74.18	74.1		72.9	73.16	73.38	73.49	73.23
	75.16	75.73	75.71	75.98	75.47		73.69	74.15	74.02	74.22	73.75		73.48	73.25	73.22	73.45	73.92
	75.89	75.88	76.05	75.85	75.6		73.33	73.66	74.15	74.23	73.84		72.98	73	73.24	73.24	73.08
Median	75.8	75.83	75.9	75.85	75.6		73.72	74.15	74.12	74.18	73.84		73.39	73.23	73.24	73.24	73.13
							Monolayer active Material humid - Length change						Monolayer active Material dry - Length change
							A1	A2	A3	A4	A5		A1	A2	A3	A4	A5
							0.975382	0.976172	0.982503	0.977549	0.977881		0.966956	0.963928	0.970573	0.966587	0.96649
							0.972559	0.97679	0.970917	0.975493	0.978633		0.967282	0.966636	0.961837	0.96728	0.96775
							0.981949	0.977282	0.978522	0.977348	0.974144		0.975179	0.968221	0.966662	0.967338	0.963119
							0.976744	0.980185	0.97444	0.978192	0.97569		0.969741	0.967371	0.966667	0.968015	0.966178
							0.965917	0.973444	0.976316	0.975154	0.976027		0.959337	0.966574	0.965526	0.966084	0.964568
							0.980442	0.979136	0.977678	0.976836	0.977209		0.977648	0.967252	0.967111	0.966702	0.979462
							0.966267	0.970743	0.975016	0.978642	0.97672		0.961655	0.962045	0.963051	0.96559	0.966667
							0.975382	0.97679	0.976316	0.977348	0.97672		0.967282	0.966636	0.966662	0.966702	0.96649
							0.0246182	0.0232098	0.0236842	0.0226524	0.0232804		0.0327177	0.0333641	0.0333377	0.0332982	0.0335099
	Monolayer active Material wet - Length change						Monolayer active Material humid - Length change
	A1	A2	A3	A4	A5		A1	A2	A3	A4	A5
	0.0341729	0.0374215	0.0303196	0.0345676	0.0346718		0.00871341	0.0127014	0.0122917	0.0113403	0.0117857
	0.0338243	0.0345157	0.0396771	0.0338263	0.0333242		0.00545554	0.0105048	0.00944042	0.00849082	0.0112452
	0.0254526	0.0328225	0.0344875	0.0337645	0.0382938		0.00694161	0.00935847	0.0122683	0.0103472	0.0114473
	0.0312032	0.0337293	0.0344828	0.0330421	0.0350062		0.00722169	0.0132459	0.00804143	0.0105134	0.00984548
	0.0423868	0.0345817	0.0357046	0.0351068	0.0367336		0.00685871	0.00710771	0.0111747	0.00938903	0.0118804
	0.0228634	0.0338567	0.0340071	0.0344452	0.0209686		0.00285792	0.0122867	0.010926	0.0104833	-0.00229978
	0.0398739	0.0394521	0.038367	0.0356363	0.0344828		0.00479583	0.0090411	0.0124249	0.0135172	0.0103996
	0.0338243	0.0345157	0.0344875	0.0344452	0.0346718		0.00685871	0.0105048	0.0111747	0.0104833	0.0112452

## Sheet: Layer Thickness
	Thickness (mm) - measured in all states
Experiment A	Monolayer active Material wet						Monolayer active Material humid						Monolayer active Material dry
	A1	A2	A3	A4	A5		A1	A2	A3	A4	A5		A1	A2	A3	A4	A5
	0.5	1.02	1.47	1.69	1.85		0.47	1.02	1.44	1.64	1.78		0.5	1.13	1.44	1.66	1.79
	0.51	1	1.44	1.71	1.82		0.51	0.99	1.4	1.76	1.75		0.51	1	1.45	1.76	1.85
	0.49	1.01	1.44	1.68	1.87		0.48	0.99	1.35	1.63	1.77		0.49	0.98	1.35	1.66	1.86
	0.5	1.1	1.48	1.53	1.95		0.48	0.98	1.5	1.48	1.87		0.48	0.97	1.48	1.46	1.95
	0.6	1.11	1.47	1.56	1.93		0.57	1.1	1.4	1.48	1.88		0.59	1.08	1.4	1.47	1.91
	0.58	1.1	1.44	1.55	1.91		0.46	1.09	1.42	1.55	1.87		0.45	1.09	1.43	1.52	1.86
	0.57	1.1	1.47	1.58	1.96		0.6	1.06	1.4	1.49	1.88		0.59	1.09	1.4	1.48	1.9
Median	0.51	1.1	1.47	1.58	1.91		0.48	1.02	1.4	1.55	1.87		0.5	1.08	1.43	1.52	1.86

## Sheet: Layer Width
	Width (mm) - measured in all states
Experiment A	Monolayer active Material wet						Monolayer active Material humid						Monolayer active Material dry
	A1	A2	A3	A4	A5		A1	A2	A3	A4	A5		A1	A2	A3	A4	A5
	20.71	20.34	20.29	21.05	21.08		20.49	20.1	20.05	20.76	20.92		20.36	19.98	19.99	20.59	20.71
	20.58	20.19	21.04	20.4	21.4		20.34	20.08	20.85	20.34	20.31		20.3	19.9	20.75	20.11	20.16
	21.17	20.39	20.71	20.15	20.5		20.85	20.27	20.52	20.04	20.4		20.81	20.12	20.43	19.93	20.27
	20.72	20.95	20.15	21.54	20.08		20.47	20.85	19.98	21.43	19.95		20.43	20.71	19.85	21.26	19.83
	20.06	19.93	20.45	20.76	20.19		19.71	19.77	20.21	20.67	20.11		19.62	19.66	20.06	20.5	19.98
	19.98	19.95	21.19	20.61	21.13		20.99	19.77	20.56	20.43	20.68		20.92	19.68	20.64	20.31	20.88
	20.68	20.77	20.33	20.9	21.46		20.42	20.52	20.1	20.84	20.43		20.33	20.4	19.94	20.66	20.24
Median	20.68	20.34	20.45	20.76	21.08		20.47	20.1	20.21	20.67	20.4		20.36	19.98	20.06	20.5	20.24

## Sheet: Layer Weight
	Weight (mm) - measured in all states
Experiment A	Monolayer active Material wet						Monolayer active Material humid						Monolayer active Material dry
	A1	A2	A3	A4	A5		A1	A2	A3	A4	A5		A1	A2	A3	A4	A5
	797	1626	2345	2784	3070		373	746	1140	1342	1536		368	725	1104	1298	1481
	818	1617	2369	2720	2925		372	749	1125	1328	1524		369	732	1106	1302	1476
	819	1644	2338	2696	2956		372	758	1153	1327	1538		369	740	1117	1285	1487
	800	1647	2396	2556	3051		373	757	1125	1350	1489		369	737	1106	1315	1449
	870	1746	2351	2532	3047		367	752	1145	1339	1509		366	738	1113	1291	1459
	882	1734	2388	2515	3095		377	746	1143	1326	1503		361	731	1114	1294	1473
	886	1774	2350	2533	3032		368	746	1141	1342	1506		365	731	1110	1295	1460
Median	819	1647	2351	2556	3047		372	749	1141	1339	1509		368	732	1110	1295	1473
	Density (mg/mm^3) - measured in all states
	Monolayer active Material wet						Monolayer active Material humid						Monolayer active Material dry
	A1	A2	A3	A4	A5		A1	A2	A3	A4	A5		A1	A2	A3	A4	A5
	1.01327	1.03177	1.04218	1.03352	1.04268		0.522769	0.490717	0.532712	0.532515	0.558697		0.492162	0.438565	0.523798	0.51887	0.547492
	1.02818	1.05617	1.02896	1.03289	0.996684		0.486448	0.508675	0.522372	0.503757	0.581479		0.486114	0.501827	0.502934	0.503784	0.542722
	1.04795	1.04832	1.03304	1.04887	1.01207		0.502437	0.507564	0.560484	0.547423	0.573894		0.492548	0.509018	0.552067	0.528805	0.537485
	1.02035	0.944107	1.05854	1.02508	1.02945		0.513556	0.499298	0.507538	0.575121	0.540455		0.51272	0.500987	0.513115	0.578444	0.512408
	0.951219	1.04274	1.02903	1.02778	1.02997		0.44505	0.46932	0.54539	0.590054	0.538643		0.433713	0.475089	0.54008	0.582944	0.52208
	1.01265	1.04339	1.03368	1.03617	1.01614		0.529862	0.466868	0.528915	0.564186	0.526993		0.521872	0.46522	0.515478	0.570675	0.513094
	0.99043	1.02329	1.03398	1.01129	0.953502		0.409599	0.465612	0.546828	0.582223	0.531015		0.416965	0.450337	0.542902	0.578268	0.519506
	1.01327	1.04274	1.03368	1.03289	1.01614		0.502437	0.490717	0.532712	0.564186	0.540455		0.492162	0.475089	0.523798	0.570675	0.52208

## Sheet: passive Layer Geometry
	No change with states
	Monolayer passive Material
Experiment A	Length (mm)	Thickness (mm)	Weight (mg)	measured width (mm)
	76.19	0.15	139	8.45
	76.01		138
	76.17		140
	76.23		139
	76.01		140
	76.17		138
	76.02		140
	75.99		131
	76.1		138
	76.14		138
	76.09		139
	76.11		137
	76.2		137
	76.01		139
	76.05		139
	76.09		138
	76.11		139
	76.02		138
	76.02		138
	76.05		140
	76.02		139
	75.98		138
	76.01		138
	76.03		136
	76.17		139
	76.23		136
	76.34		137
	76.28		139
	76.05		135
	76.09		135
	76.15		135
	76		136
	76		137
	76.03		137
	76.05		131
Median	76.05		138

## Sheet: Curvature Timoshenko
		Bilayer Measurements					Monolayer Measurements							Calculated Curvature		Measured Curvature
Filament 1		Thickness			Width		Young's modulus		Elongation	Stiffness ratio	Thickness ratio	Width ratio	Total thickness	kappa	MEDIAN kappa	kappa
		mm			mm		MPa						mm	1/mm	1/mm	1/mm
		active	median (needed for optimization)	passive	active	passive	active	passive	alpha_T_2	n	m	q	h	6*alpha_T_2*(1+m)^2/(h*(3*(1+m)^2+(1+n*m*q)*(m^2+1/n/m/q)))			median (needed for optimization)
wet-to-humid	A1	0.47	0.48	0.15	20.49	8.45	37.5678	2188.67	0.026	58.2593	0.319149	0.412396	0.62	0.0605281	0.0598045	0.0417	0.037
		0.51		0.15	20.34	8.45	37.5678	2188.67	0.026	58.2593	0.294118	0.415438	0.66	0.057645		0.0238
		0.48		0.15	20.85	8.45	37.5678	2188.67	0.026	58.2593	0.3125	0.405276	0.63	0.0598961		0.037
		0.48		0.15	20.47	8.45	37.5678	2188.67	0.026	58.2593	0.3125	0.412799	0.63	0.0598045		0.0465
		0.57		0.15	19.71	8.45	37.5678	2188.67	0.026	58.2593	0.263158	0.428716	0.72	0.0534878		0.0396
		0.46		0.15	20.99	8.45	37.5678	2188.67	0.026	58.2593	0.326087	0.402573	0.61	0.0613878		0.0335
		0.6		0.15	20.42	8.45	37.5678	2188.67	0.026	58.2593	0.25	0.41381	0.75	0.0516479		0.0197
	A2	1.02	1.02	0.15	20.1	8.45	37.5678	2188.67	0.026	58.2593	0.147059	0.420398	1.17	0.0329488	0.0329488	0.0394	0.0414
		0.99		0.15	20.08	8.45	37.5678	2188.67	0.026	58.2593	0.151515	0.420817	1.14	0.0338818		0.0468
		0.99		0.15	20.27	8.45	37.5678	2188.67	0.026	58.2593	0.151515	0.416872	1.14	0.0338708		0.0315
		0.98		0.15	20.85	8.45	37.5678	2188.67	0.026	58.2593	0.153061	0.405276	1.13	0.0341584		0.0429
		1.1		0.15	19.77	8.45	37.5678	2188.67	0.026	58.2593	0.136364	0.427415	1.25	0.0306954		0.0418
		1.09		0.15	19.77	8.45	37.5678	2188.67	0.026	58.2593	0.137615	0.427415	1.24	0.0309642		0.0375
		1.06		0.15	20.52	8.45	37.5678	2188.67	0.026	58.2593	0.141509	0.411793	1.21	0.031747		0.0414
	A3	1.44	1.4	0.15	20.05	8.45	37.5678	2188.67	0.026	58.2593	0.104167	0.421446	1.59	0.0235138	0.0241277	0.0355	0.0317
		1.4		0.15	20.85	8.45	37.5678	2188.67	0.026	58.2593	0.107143	0.405276	1.55	0.0241277		0.0317
		1.35		0.15	20.52	8.45	37.5678	2188.67	0.026	58.2593	0.111111	0.411793	1.5	0.0250571		0.0271
		1.5		0.15	19.98	8.45	37.5678	2188.67	0.026	58.2593	0.1	0.422923	1.65	0.0225619		0.0309
		1.4		0.15	20.21	8.45	37.5678	2188.67	0.026	58.2593	0.107143	0.41811	1.55	0.0241807		0.0308
		1.42		0.15	20.56	8.45	37.5678	2188.67	0.026	58.2593	0.105634	0.410992	1.57	0.023807		0.0324
		1.4		0.15	20.1	8.45	37.5678	2188.67	0.026	58.2593	0.107143	0.420398	1.55	0.0241898		0.034
	A4	1.64	1.55	0.15	20.76	8.45	37.5678	2188.67	0.026	58.2593	0.0914634	0.407033	1.79	0.0205123	0.0217774	0.0286	0.0284
		1.76		0.15	20.34	8.45	37.5678	2188.67	0.026	58.2593	0.0852273	0.415438	1.91	0.0190847		0.0294
		1.63		0.15	20.04	8.45	37.5678	2188.67	0.026	58.2593	0.0920245	0.421657	1.78	0.0207058		0.0284
		1.48		0.15	21.43	8.45	37.5678	2188.67	0.026	58.2593	0.101351	0.394307	1.63	0.0227507		0.0253
		1.48		0.15	20.67	8.45	37.5678	2188.67	0.026	58.2593	0.101351	0.408805	1.63	0.0228149		0.0211
		1.55		0.15	20.43	8.45	37.5678	2188.67	0.026	58.2593	0.0967742	0.413607	1.7	0.0217774		0.0298
		1.49		0.15	20.84	8.45	37.5678	2188.67	0.026	58.2593	0.100671	0.40547	1.64	0.0226438		0.0233
	A5	1.78	1.87	0.15	20.92	8.45	37.5678	2188.67	0.026	58.2593	0.0842697	0.40392	1.93	0.0188081	0.0179333	0.0299	0.0244
		1.75		0.15	20.31	8.45	37.5678	2188.67	0.026	58.2593	0.0857143	0.416051	1.9	0.0192021		0.0244
		1.77		0.15	20.4	8.45	37.5678	2188.67	0.026	58.2593	0.0847458	0.414216	1.92	0.0189659		0.0217
		1.87		0.15	19.95	8.45	37.5678	2188.67	0.026	58.2593	0.0802139	0.423559	2.02	0.0179333		0.0254
		1.88		0.15	20.11	8.45	37.5678	2188.67	0.026	58.2593	0.0797872	0.420189	2.03	0.0178179		0.023
		1.87		0.15	20.68	8.45	37.5678	2188.67	0.026	58.2593	0.0802139	0.408607	2.02	0.0178691		0.025
		1.88		0.15	20.43	8.45	37.5678	2188.67	0.026	58.2593	0.0797872	0.413607	2.03	0.0177898		0.0244
	total median (needed for analytical curve and optimization)	x		0.15	20.42	8.45	37.5678	2188.67	0.026
wet-to-dry	A1	0.5	0.5	0.15	20.36	8.45	98.9639	2467.95	0.035	24.9379	0.3	0.415029	0.65	0.0807512	0.0807512	0.0581	0.0564
		0.51		0.15	20.3	8.45	98.9639	2467.95	0.035	24.9379	0.294118	0.416256	0.66	0.079505		0.0564
		0.49		0.15	20.81	8.45	98.9639	2467.95	0.035	24.9379	0.306122	0.406055	0.64	0.0820211		0.0594
		0.48		0.15	20.43	8.45	98.9639	2467.95	0.035	24.9379	0.3125	0.413607	0.63	0.0833331		0.0613
		0.59		0.15	19.62	8.45	98.9639	2467.95	0.035	24.9379	0.254237	0.430683	0.74	0.070562		0.0462
		0.45		0.15	20.92	8.45	98.9639	2467.95	0.035	24.9379	0.333333	0.40392	0.6	0.087448		0.044
		0.59		0.15	20.33	8.45	98.9639	2467.95	0.035	24.9379	0.254237	0.415642	0.74	0.070483		0.0469
	A2	1.13	1.08	0.15	19.98	8.45	98.9639	2467.95	0.035	24.9379	0.132743	0.422923	1.28	0.0375515	0.0394676	0.0571	0.0532
		1		0.15	19.9	8.45	98.9639	2467.95	0.035	24.9379	0.15	0.424623	1.15	0.0427032		0.056
		0.98		0.15	20.12	8.45	98.9639	2467.95	0.035	24.9379	0.153061	0.41998	1.13	0.0435511		0.0451
		0.97		0.15	20.71	8.45	98.9639	2467.95	0.035	24.9379	0.154639	0.408015	1.12	0.0438807		0.0538
		1.08		0.15	19.66	8.45	98.9639	2467.95	0.035	24.9379	0.138889	0.429807	1.23	0.0394676		0.0532
		1.09		0.15	19.68	8.45	98.9639	2467.95	0.035	24.9379	0.137615	0.42937	1.24	0.0390823		0.047
		1.09		0.15	20.4	8.45	98.9639	2467.95	0.035	24.9379	0.137615	0.414216	1.24	0.0389169		0.0512
	A3	1.44	1.43	0.15	19.99	8.45	98.9639	2467.95	0.035	24.9379	0.104167	0.422711	1.59	0.0288006	0.0288769	0.0453	0.0422
		1.45		0.15	20.75	8.45	98.9639	2467.95	0.035	24.9379	0.103448	0.407229	1.6	0.0284025		0.042
		1.35		0.15	20.43	8.45	98.9639	2467.95	0.035	24.9379	0.111111	0.413607	1.5	0.030849		0.0387
		1.48		0.15	19.85	8.45	98.9639	2467.95	0.035	24.9379	0.101351	0.425693	1.63	0.0279574		0.0422
		1.4		0.15	20.06	8.45	98.9639	2467.95	0.035	24.9379	0.107143	0.421236	1.55	0.0297077		0.0416
		1.43		0.15	20.64	8.45	98.9639	2467.95	0.035	24.9379	0.104895	0.409399	1.58	0.0288769		0.0441
		1.4		0.15	19.94	8.45	98.9639	2467.95	0.035	24.9379	0.107143	0.423771	1.55	0.0297355		0.0429
	A4	1.66	1.52	0.15	20.59	8.45	98.9639	2467.95	0.035	24.9379	0.0903614	0.410393	1.81	0.0243546	0.0270203	0.0391	0.0383
		1.76		0.15	20.11	8.45	98.9639	2467.95	0.035	24.9379	0.0852273	0.420189	1.91	0.0228508		0.0383
		1.66		0.15	19.93	8.45	98.9639	2467.95	0.035	24.9379	0.0903614	0.423984	1.81	0.0245035		0.0392
		1.46		0.15	21.26	8.45	98.9639	2467.95	0.035	24.9379	0.10274	0.39746	1.61	0.0280662		0.0352
		1.47		0.15	20.5	8.45	98.9639	2467.95	0.035	24.9379	0.102041	0.412195	1.62	0.0280223		0.031
		1.52		0.15	20.31	8.45	98.9639	2467.95	0.035	24.9379	0.0986842	0.416051	1.67	0.0270203		0.0385
		1.48		0.15	20.66	8.45	98.9639	2467.95	0.035	24.9379	0.101351	0.409003	1.63	0.0277711		0.0322
	A5	1.79	1.86	0.15	20.71	8.45	98.9639	2467.95	0.035	24.9379	0.0837989	0.408015	1.94	0.0222691	0.0212416	0.0379	0.0337
		1.85		0.15	20.16	8.45	98.9639	2467.95	0.035	24.9379	0.0810811	0.419147	2	0.0215358		0.0337
		1.86		0.15	20.27	8.45	98.9639	2467.95	0.035	24.9379	0.0806452	0.416872	2.01	0.0213745		0.0316
		1.95		0.15	19.83	8.45	98.9639	2467.95	0.035	24.9379	0.0769231	0.426122	2.1	0.020299		0.0339
		1.91		0.15	19.98	8.45	98.9639	2467.95	0.035	24.9379	0.078534	0.422923	2.06	0.0207737		0.032
		1.86		0.15	20.88	8.45	98.9639	2467.95	0.035	24.9379	0.0806452	0.404693	2.01	0.0212416		0.0343
		1.9		0.15	20.24	8.45	98.9639	2467.95	0.035	24.9379	0.0789474	0.41749	2.05	0.0208469		0.0332
	total median (needed for analytical curve)	x		0.15	20.3	8.45	98.9639	2467.95	0.035

## Sheet: Deflection linear
	Bilayer Measurements								Monolayer Measurements																	Calculated Deflection		Measured Curvature
Filament 1	Length		Thickness		Width		Weigth		Young's modulus		Stiffness ratio	Area			e	e1	e2	2nd moment of intertia			Ideal Bending stiffness	density		life load g	length L	w	MEDIAN w	w
	mm		mm		mm		mg		MPa			mm^2			mm	mm	mm	mm^4			Nmm^2	mg/mm^3		N/mm	mm	mm	mm	mm
	active	passive	active	passive	active	passive	active	passive	active	passive	pass/act	active	passive	ideal				active	passive	ideal	ideal	active	passive
A1	75.96	76.19	0.5	0.15	20.71	8.45	797	139	6.33004	1785.38	282.049	10.355	1.2675	367.852	0.325	0.00914871	0.315851	0.215729	0.00237656	1.94899	12.3372	1.01327	1.43936	0.000120827	73.075	34.9087	34.3567	29.605
	75.8	76.01	0.51		20.58		818	138				10.4958	1.2675	367.993	0.33	0.00941217	0.320588	0.227496	0.00237656	2.0082	12.712	1.02818	1.43239	0.000123676	72.905	34.3567		33.095
	75.34	76.17	0.49		21.17		819	140				10.3733	1.2675	367.871	0.32	0.00902343	0.310977	0.207552	0.00237656	1.91013	12.0912	1.04795	1.45009	0.000124672	72.755	36.1128		29.525
	75.68	76.23	0.5		20.72		800	139				10.36	1.2675	367.857	0.325	0.00915301	0.315847	0.215833	0.00237656	1.9496	12.341	1.02035	1.4386	0.000121588	72.955	34.8873		26.86
	75.99	76.01	0.6		20.06		870	140				12.036	1.2675	369.533	0.375	0.0122141	0.362786	0.36108	0.00237656	2.66882	16.8938	0.951219	1.45315	0.000130382	73	27.3964		32.6
	75.16	76.17	0.58		19.98		882	138				11.5884	1.2675	369.086	0.365	0.0114601	0.35354	0.324861	0.00237656	2.49056	15.7654	1.01265	1.42938	0.000132893	72.665	29.3772		36.925
	75.89	76.02	0.57		20.68		886	140				11.7876	1.2675	369.285	0.36	0.0114912	0.348509	0.319149	0.00237656	2.46837	15.6249	0.99043	1.45296	0.000132596	72.955	30.05		39.25
A2	75.96	75.99	1.02		20.34		1626	131				20.7468	1.2675	378.244	0.585	0.0320874	0.552913	1.79875	0.00237656	9.17969	58.1078	1.03177	1.36009	0.000226904	72.975	13.8425	12.3722	19.705
	75.83	76.1	1		20.19		1617	138				20.19	1.2675	377.687	0.575	0.0307377	0.544262	1.6825	0.00237656	8.67128	54.8896	1.05617	1.43069	0.000226978	72.965	14.6508		24.2
	76.15	76.14	1.01		20.39		1644	138				20.5939	1.2675	378.091	0.58	0.0315915	0.548409	1.75065	0.00237656	8.97141	56.7894	1.04832	1.42994	0.000229568	73.145	14.4641		19.375
	75.7	76.09	1.1		20.95		1647	139				23.045	1.2675	380.542	0.625	0.0378489	0.587151	2.3237	0.00237656	11.4508	72.4842	0.944107	1.44125	0.000231356	72.895	11.2652		21.04
	75.69	76.11	1.11		19.93		1746	137				22.1223	1.2675	379.62	0.63	0.0367132	0.593287	2.27141	0.00237656	11.2104	70.9622	1.04274	1.42014	0.000243953	72.9	12.1367		21.87
	75.73	76.2	1.1		19.95		1734	137				21.945	1.2675	379.442	0.625	0.0361468	0.588853	2.21279	0.00237656	10.9596	69.3746	1.04339	1.41846	0.000242258	72.965	12.3722		18.085
	75.88	76.01	1.1		20.77		1774	139				22.847	1.2675	380.344	0.625	0.0375433	0.587457	2.30374	0.00237656	11.3626	71.9255	1.02329	1.44277	0.000247288	72.945	12.1678		20.955
A3	75.44	76.05	1.47		20.29		2345	139				29.8263	1.2675	387.324	0.81	0.062375	0.747625	5.37097	0.00237656	24.1034	152.575	1.04218	1.44201	0.000322867	72.745	7.40733	7.51104	9.065
	75.99	76.09	1.44		21.04		2369	138				30.2976	1.2675	387.795	0.795	0.0621117	0.732888	5.23543	0.00237656	23.5585	149.126	1.02896	1.43088	0.00032362	73.04	7.7203		3.41
	75.89	76.11	1.44		20.71		2338	139				29.8224	1.2675	387.32	0.795	0.0612125	0.733787	5.15331	0.00237656	23.2208	146.989	1.03304	1.44087	0.00032014	73	7.73137		5.82
	75.9	76.02	1.48		20.15		2396	138				29.822	1.2675	387.319	0.815	0.0627517	0.752248	5.44351	0.00237656	24.3972	154.435	1.05854	1.4322	0.000327489	72.96	7.51104		9.235
	76	76.02	1.47		20.45		2351	138				30.0615	1.2675	387.559	0.81	0.0628287	0.747171	5.41332	0.00237656	24.2771	153.675	1.02903	1.4322	0.000321273	73.01	7.42522		7.82
	75.71	76.05	1.44		21.19		2388	140				30.5136	1.2675	388.011	0.795	0.0625197	0.73248	5.27275	0.00237656	23.7118	150.097	1.03368	1.45238	0.00032748	72.88	7.6941		9.565
	76.05	76.02	1.47		20.33		2350	139				29.8851	1.2675	387.382	0.81	0.0624885	0.747512	5.38156	0.00237656	24.1468	152.85	1.03398	1.44258	0.000321073	73.035	7.47088		8.07
A4	75.72	75.98	1.69		21.05		2784	138				35.5745	1.2675	393.072	0.92	0.0832635	0.836736	8.46703	0.00237656	36.5225	231.189	1.03352	1.43295	0.000378502	72.85	5.76407	6.44692	4.49
	75.49	76.01	1.71		20.4		2720	138				34.884	1.2675	392.381	0.93	0.0826801	0.84732	8.50036	0.00237656	36.6595	232.056	1.03289	1.43239	0.000371277	72.75	5.60205		4.24
	75.93	76.03	1.68		20.15		2696	136				33.852	1.2675	391.349	0.915	0.0791482	0.835852	7.96199	0.00237656	34.5225	218.529	1.04887	1.41126	0.000365865	72.98	5.93661		4.115
	75.66	76.17	1.53		21.54		2556	139				32.9562	1.2675	390.453	0.84	0.0709001	0.7691	6.42893	0.00237656	28.3904	179.712	1.02508	1.43974	0.00034931	72.915	6.86769		3.825
	76.07	76.23	1.56		20.76		2532	136				32.3856	1.2675	389.883	0.855	0.0710205	0.783979	6.5678	0.00237656	28.9463	183.231	1.02778	1.40755	0.000344029	73.15	6.71991		1.5
	75.98	76.34	1.55		20.61		2515	137				31.9455	1.2675	389.443	0.85	0.0697244	0.780276	6.39576	0.00237656	28.2534	178.845	1.03617	1.41586	0.000342324	73.16	6.85432		3.16
	75.85	76.28	1.58		20.9		2533	139				33.022	1.2675	390.519	0.865	0.0731437	0.791856	6.86968	0.00237656	30.1586	190.905	1.01129	1.43766	0.00034548	73.065	6.44692		1.41
A5	75.5	76.05	1.85		21.08		3070	135				38.998	1.2675	396.495	1	0.0983568	0.901643	11.1226	0.00237656	46.9551	297.228	1.04268	1.40051	0.000416311	72.775	4.91096	4.53422	5.905
	75.35	76.09	1.82		21.4		2925	135				38.948	1.2675	396.445	0.985	0.0967694	0.888231	10.7509	0.00237656	45.4971	287.999	0.996684	1.39977	0.000398218	72.72	4.83343		3.615
	76.19	76.15	1.87		20.5		2956	135				38.335	1.2675	395.832	1.01	0.097815	0.912185	11.1711	0.00237656	47.1597	298.523	1.01207	1.39867	0.000397997	73.17	4.77688		2.245
	75.69	76	1.95		20.08		3051	136				39.156	1.2675	396.653	1.05	0.103652	0.946348	12.4076	0.00237656	51.9858	329.073	1.02945	1.41181	0.000412988	72.845	4.41727		6.405
	75.92	76	1.93		20.19		3047	137				38.9667	1.2675	396.464	1.04	0.102217	0.937783	12.0956	0.00237656	50.7699	321.376	1.02997	1.42219	0.000411402	72.96	4.53422		3.825
	75.47	76.03	1.91		21.13		3095	137				40.3583	1.2675	397.856	1.03	0.104483	0.925517	12.2693	0.00237656	51.4124	325.443	1.01614	1.42163	0.000419982	72.75	4.51853		5.82
	75.6	76.05	1.96		21.46		3032	131				42.0616	1.2675	399.559	1.055	0.11106	0.94394	13.4653	0.00237656	56.023	354.628	0.953502	1.35901	0.000410336	72.825	4.06817		5.475
total median (needed for analytical curve)	75.83	76.05	thk_2	0.15	20.61	8.45			6.33004	1785.38												1.02945	1.4322
