# Supplementary material for: Development of a Material Design Space for 4D-Printed Bio-Inspired Hygroscopically Actuated Bilayer Structures with Unequal Effective Layer Widths
Source: Biomimetics (Basel). 2021 Oct 6;6(4):58. doi: 10.3390/biomimetics6040058 (PMC8544213; doi:10.3390/biomimetics6040058)
Supplement: Supplementary file 1 [file biomimetics-06-00058-s001.zip › Krueger_Thierer_et_al/Raw_Values_Bilayers_B.xlsx]

## Sheet: Deflection
	Deflection [mm] - measured in wet state
Experiment B	Bilayer						Monolayer active Material						Monolayer passive Material
Sample	B1	B2	B3	B4	B5		B1	B2	B3	B4	B5		B1	B2	B3	B4	B5
	7.515	6.68	4.385	3.235	1.67		22.36	23.1	29.375	24.255	28.3		11.795	3.71	2.56	1.815	0.91
	6.89	6.16	3.55	2.82	2.4		26.91	28.38	26.9	29.87	32.79		11.1	3.71	1.9	1.73	1.99
	8.455	6.365	3.86	2.09	3.44		26.735	29.95	31.845	32.875	34.695		9.82	2.805	1.565	1.57	0.825
	8.04	5.535	4.175	1.98	3.025		26.485	27.245	24.95	28.55	36.055		10.31	2.9	1.98	1.735	1.98
	8.975	6.89	3.65	2.19	2.295		28.485	30.28	31.19	31.27	37.87		9.5	4.375	1.235	0.495	1.155
	8.665	7.1	4.07	2.925	2.92		29.04	32.095	32.875	32.84	32.575		10.805	3.055	2.155	0.91	1.08
	10.02	5.845	3.445	2.715	1.67		23.925	25.34	25.41	25.575	32.92		10.975	2.98	2.145	1.98	1.32
Median	8.455	6.365	3.86	2.715	2.4		26.735	28.38	29.375	29.87	32.92		10.805	3.055	1.98	1.73	1.155

## Sheet: Curvature
	Curvature (mm^-1) - measured in humid and dry state
Experiment B	Bilayer humid						Bilayer dry
	B1	B2	B3	B4	B5		B1	B2	B3	B4	B5
	0.0342	0.0253	0.0059	0.0036			0.0479	0.0352	0.0076	0.0054	0.0017
	0.03	0.0213	0.0064	0.0027	0.00074912		0.0428	0.0307	0.0086	0.0051	0.0012
	0.0355	0.0197	0.0087	0.0026	0.00066104		0.0452	0.03	0.0121	0.0052	0.002
	0.0301	0.0209	0.0073	0.0027	0.00093904		0.0422	0.0305	0.0111	0.0029	0.0021
	0.0335	0.0248	0.0091		0.00063377		0.045	0.0345	0.0125		0.0022
	0.0323	0.0186	0.0068		0.0011		0.0429	0.0292	0.01		0.0019
	0.0328	0.0207	0.0077		0.00072241		0.0446	0.0301	0.0123
Median	0.0328	0.0209	0.0073	0.0027	0.000735765		0.0446	0.0305	0.0111	0.00515	0.00195

## Sheet: Layer Length
	median Length (mm) - measured in all states
Experiment B	Monolayer active Material wet						Monolayer active Material humid - Length						Monolayer active Material dry - Length
	B1	B2	B3	B4	B5		B1	B2	B3	B4	B5		B1	B2	B3	B4	B5
	75.89	75.76	76.06	77.3	77.6		73.8	73.63	73.98	75.5	75.73		73.13	73.4	73.75	74.98	75.55
	75.9	75.78	75.99	76.48	77.17		73.52	73.64	73.89	74.69	75.6		73.3	73.44	73.63	74.04	74.82
	75.6	75.83	75.86	77.2	76.86		73.27	73.9	75.15	75.43	75		73.07	73.49	74.59	74.93	74.65
	75.67	76.03	76.03	76.81	77.25		73.53	73.62	73.71	74.85	75.23		73.26	73.33	73.67	74.66	74.63
	75.61	75.86	77.16	77.02	77.08		73.25	73.76	75.13	75.38	75.46		73.18	73.27	73.96	74.77	74.97
	75.79	75.88	76.11	77.1	77.06		73.47	73.75	74.24	75.37	75.5		73.23	73.36	73.52	74.73	74.93
	75.46	75.92	75.92	76.36	76.36		73.28	73.58	73.79	74.12	74.47		73.01	73.38	73.7	73.81	74.05
Median	75.67	75.86	76.03	77.02	77.08		73.47	73.64	73.98	75.37	75.46		73.18	73.38	73.7	74.73	74.82
IQR	0.235	0.095	0.13	0.505	0.25		0.25	0.13	0.845	0.635	0.435		0.145	0.075	0.205	0.5	0.31
							Monolayer active Material humid - Length change						Monolayer active Material dry - Length change
							B1	B2	B3	B4	B5		B1	B2	B3	B4	B5
							0.97246	0.971885	0.972653	0.976714	0.975902		0.963632	0.968849	0.969629	0.969987	0.973582
							0.968643	0.97176	0.972365	0.976595	0.979655		0.965744	0.969121	0.968943	0.968096	0.969548
							0.96918	0.974548	0.990641	0.977073	0.9758		0.966534	0.969142	0.983259	0.970596	0.971246
							0.971719	0.968302	0.969486	0.974482	0.973851		0.968151	0.964488	0.96896	0.972009	0.966084
							0.968787	0.972317	0.973691	0.978707	0.978983		0.967861	0.965858	0.958528	0.970787	0.972626
							0.969389	0.971929	0.97543	0.977562	0.979756		0.966222	0.96679	0.96597	0.969261	0.972359
							0.971111	0.969178	0.971944	0.970665	0.975249		0.967532	0.966544	0.970759	0.966606	0.969749
							0.969389	0.971885	0.972653	0.976714	0.975902		0.966534	0.96679	0.96896	0.969987	0.971246

## Sheet: Layer Thickness
	median Thickness (mm) - measured in all states
Experiment B	Monolayer active Material wet						Monolayer active Material humid						Monolayer active Material dry
	B1	B2	B3	B4	B5		B1	B2	B3	B4	B5		B1	B2	B3	B4	B5
	1.36	1.3	1.36	1.37	1.42		1.29	1.24	1.26	1.33	1.34		1.3	1.25	1.33	1.32	1.36
	1.43	1.38	1.45	1.47	1.53		1.35	1.31	1.4	1.38	1.43		1.34	1.3	1.36	1.37	1.44
	1.45	1.41	1.48	1.5	1.57		1.39	1.33	1.43	1.44	1.46		1.39	1.31	1.4	1.42	1.46
	1.44	1.37	1.49	1.45	1.57		1.37	1.31	1.36	1.47	1.45		1.34	1.31	1.35	1.39	1.45
	1.46	1.44	1.46	1.52	1.59		1.39	1.37	1.39	1.41	1.5		1.39	1.33	1.4	1.42	1.47
	1.48	1.42	1.49	1.5	1.58		1.4	1.35	1.4	1.44	1.47		1.39	1.35	1.39	1.45	1.47
	1.43	1.37	1.41	1.45	1.51		1.36	1.3	1.36	1.4	1.41		1.33	1.29	1.34	1.38	1.4
Median	1.44	1.38	1.46	1.47	1.57		1.37	1.31	1.39	1.41	1.45		1.34	1.31	1.36	1.39	1.45
IQR	0.025	0.045	0.055	0.05	0.055		0.035	0.035	0.04	0.05	0.045		0.055	0.025	0.05	0.045	0.045
							Monolayer active Material humid - change						Monolayer active Material dry - change
							B1	B2	B3	B4	B5		B1	B2	B3	B4	B5
							0.948529	0.953846	0.926471	0.970803	0.943662		0.955882	0.961538	0.977941	0.963504	0.957746
							0.944056	0.949275	0.965517	0.938776	0.934641		0.937063	0.942029	0.937931	0.931973	0.941176
							0.958621	0.943262	0.966216	0.96	0.929936		0.958621	0.929078	0.945946	0.946667	0.929936
							0.951389	0.956204	0.912752	1.01379	0.923567		0.930556	0.956204	0.90604	0.958621	0.923567
							0.952055	0.951389	0.952055	0.927632	0.943396		0.952055	0.923611	0.958904	0.934211	0.924528
							0.945946	0.950704	0.939597	0.96	0.93038		0.939189	0.950704	0.932886	0.966667	0.93038
							0.951049	0.948905	0.964539	0.965517	0.933775		0.93007	0.941606	0.950355	0.951724	0.927152
							0.951049	0.950704	0.952055	0.96	0.933775		0.939189	0.942029	0.945946	0.951724	0.929936

## Sheet: Layer Width
	median Width (mm) - measured in all states
Experiment B	Monolayer active Material wet						Monolayer active Material humid						Monolayer active Material dry
	B1	B2	B3	B4	B5		B1	B2	B3	B4	B5		B1	B2	B3	B4	B5
	20.91	21.55	20.81	20.78	20.54		20.65	21.25	20.57	20.51	20.29		20.6	21.19	20.48	20.4	20.21
	20.77	21.36	20.82	20.66	20.49		20.44	21.09	20.39	20.39	20.33		20.42	21.04	20.36	20.35	20.2
	20.68	21.4	20.62	20.71	20.57		20.39	20.84	20.48	20.53	20.33		20.35	21.12	20.36	20.41	20.23
	20.75	21.38	20.67	20.53	20.48		20.52	20.83	20.31	20.48	20.33		20.4	20.77	20.36	20.33	20.19
	20.66	21.33	20.69	20.72	20.35		20.4	21.1	20.43	20.53	20.28		20.35	20.98	20.24	20.37	20.12
	20.63	21.2	20.64	20.75	20.37		20.39	21.04	20.4	20.5	20.19		20.32	20.76	20.31	20.34	20.12
	20.7	21.37	20.67	20.68	20.41		20.4	21.21	20.36	20.42	20.27		20.33	20.87	20.29	20.37	20.08
Median	20.7	21.37	20.67	20.71	20.48		20.4	21.09	20.4	20.5	20.29		20.35	20.98	20.36	20.37	20.19
IQR	0.09	0.045	0.095	0.065	0.125		0.085	0.215	0.08	0.07	0.055		0.07	0.26	0.06	0.04	0.085
							Monolayer active Material humid - change						Monolayer active Material dry - change
							B1	B2	B3	B4	B5		B1	B2	B3	B4	B5
							0.987566	0.986079	0.988467	0.987007	0.987829		0.985175	0.983295	0.984142	0.981713	0.983934
							0.984112	0.98736	0.979347	0.986931	0.992191		0.983149	0.985019	0.977906	0.984995	0.985847
							0.985977	0.973832	0.99321	0.991309	0.988333		0.984043	0.986916	0.987391	0.985514	0.983471
							0.988916	0.974275	0.982583	0.997565	0.992676		0.983133	0.971469	0.985002	0.990258	0.98584
							0.987415	0.989217	0.987434	0.99083	0.99656		0.984995	0.983591	0.97825	0.983108	0.988698
							0.988366	0.992453	0.988372	0.987952	0.991163		0.984973	0.979245	0.984012	0.980241	0.987727
							0.985507	0.992513	0.985002	0.987427	0.993141		0.982126	0.976603	0.981616	0.98501	0.983831
							0.987415	0.98736	0.987434	0.987952	0.992191		0.984043	0.983295	0.984012	0.984995	0.98584

## Sheet: Layer Weight
	median Weight (mm) - measured in all states
Experiment B	Monolayer active Material wet						Monolayer active Material humid						Monolayer active Material dry
	B1	B2	B3	B4	B5		B1	B2	B3	B4	B5		B1	B2	B3	B4	B5
	2266	2257	2297	2291	2323		1186	1198	1202	1196	1180		1151	1158	1163	1152	1144
	2309	2304	2348	2369	2386		1192	1199	1204	1193	1176		1150	1154	1159	1158	1145
	2366	2364	2373	2392	2430		1179	1190	1180	1185	1165		1150	1158	1149	1152	1137
	2303	2329	2354	2367	2417		1181	1179	1191	1194	1169		1142	1147	1142	1146	1130
	2343	2357	2364	2398	2409		1167	1183	1165	1170	1169		1137	1145	1139	1143	1128
	2359	2379	2383	2428	2422		1179	1180	1176	1182	1170		1147	1149	1146	1155	1135
	2262	2282	2293	2331	2357		1153	1169	1182	1190	1170		1124	1137	1138	1147	1128
Median	2309	2329	2354	2369	2409		1179	1183	1182	1190	1170		1147	1149	1146	1152	1135
IQR	66.5	67.5	46	46	48		10.5	14.5	18.5	10	4		10.5	10	13.5	7	11.5
	Density (mg/mm^3) - measured in all states
	Monolayer active Material wet						Monolayer active Material humid						Monolayer active Material dry
	B1	B2	B3	B4	B5		B1	B2	B3	B4	B5		B1	B2	B3	B4	B5
	1.04998	1.06341	1.06707	1.04107	1.02636		0.603279	0.617478	0.626881	0.58072	0.573096		0.587718	0.595623	0.578943	0.570562	0.550917
	1.02426	1.03145	1.02351	1.01993	0.986253		0.587565	0.589329	0.570815	0.567651	0.535072		0.573368	0.574492	0.568476	0.560993	0.526107
	1.0437	1.03317	1.02503	0.997407	0.978976		0.567748	0.580969	0.536151	0.531402	0.523329		0.55639	0.569528	0.540423	0.530476	0.515682
	1.01857	1.04582	1.0053	1.0352	0.97308		0.57133	0.586891	0.584974	0.529865	0.52713		0.570249	0.574876	0.56398	0.543181	0.517203
	1.02733	1.01156	1.01424	0.988581	0.965903		0.561847	0.554831	0.546046	0.536194	0.509259		0.549274	0.560044	0.543486	0.528493	0.508717
	1.01942	1.04146	1.01809	1.01178	0.976556		0.562158	0.563301	0.55464	0.531254	0.522138		0.554544	0.558856	0.552147	0.524044	0.512147
	1.01267	1.02668	1.03631	1.01802	1.00155		0.56712	0.576197	0.5785	0.561601	0.549707		0.56937	0.575533	0.567921	0.552813	0.541866
	1.02426	1.03317	1.02351	1.01802	0.978976		0.567748	0.580969	0.570815	0.536194	0.52713		0.56937	0.574492	0.56398	0.543181	0.517203
							Monolayer active Material humid - change						Monolayer active Material dry - change
							B1	B2	B3	B4	B5		B1	B2	B3	B4	B5
							0.574561	0.580658	0.587478	0.557811	0.558378		0.559741	0.560106	0.542553	0.548054	0.536769
							0.573649	0.57136	0.557703	0.55656	0.54253		0.559788	0.556976	0.555417	0.550032	0.53344
							0.543978	0.562315	0.523061	0.532783	0.534567		0.533096	0.551241	0.527229	0.531855	0.526757
							0.560916	0.561179	0.581891	0.511849	0.541713		0.559854	0.54969	0.561008	0.524712	0.531511
							0.546901	0.548488	0.538378	0.542387	0.527236		0.534662	0.553642	0.535854	0.534598	0.526675
							0.551447	0.540876	0.544785	0.525071	0.534673		0.543977	0.536607	0.542336	0.517944	0.524442
							0.560022	0.561224	0.558232	0.551658	0.548855		0.562245	0.560578	0.548024	0.543026	0.541027
							0.560022	0.561224	0.557703	0.542387	0.541713		0.559741	0.553642	0.542553	0.534598	0.531511

## Sheet: passive Layer Geometry
	No change with states
	Monolayer passive Material
Experiment B	Length (mm)		measured width (mm)		Thickness (mm)						Weight (mg)
	all samples		all samples		B1	B2	B3	B4	B5		B1	B2	B3	B4	B5
	76.26	75.95	9.1		0.18	0.39	0.77	1.22	1.62		139	286	569	861	1141
	75.98				0.21	0.4	0.78	1.2	1.61		140	285	573	864	1143
	75.9				0.18	0.39	0.81	1.17	1.69		142	280	564	838	1119
	76.02				0.2	0.35	0.77	1.2	1.65		140	284	571	861	1135
	75.95				0.19	0.4	0.78	1.2	1.63		144	282	573	854	1143
	75.95				0.18	0.42	0.77	1.21	1.66		141	284	572	861	1145
	75.79				0.19	0.4	0.8	1.21	1.66		141	283	570	855	1139
	76.15	76.15
	76.13
	76.14				0.19	0.4	0.78	1.2	1.65		141	284	571	861	1141
	76.34
	76.12
	76.28
	76.17
	76.25	76.17
	76.61
	76.13
	76.17
	76.14
	76.25
	76.11
	76.44	76.25
	76.53
	76.14
	76.18
	76.29
	76.25
	76.08
	76.35	76.21
	76.35
	76.2
	76.21
	76.19
	76.5
	76.19
	76.18

## Sheet: Curvature Timoshenko
		Bilayer Measurements					Monolayer Measurements							Calculated Curvature		Measured Curvature
Filament 2		Thickness			Width		Young's modulus		Elongation	Stiffness ratio	Thickness ratio	Width ratio	Total thickness	kappa	MEDIAN kappa	kappa
		mm			mm		MPa						mm	1/mm	1/mm	1/mm
		active	passive	median (needed for optimization)	active	passive	active	passive	alpha_T_2	n	m	q	h	6*alpha_T_2*(1+m)^2/(h*(3*(1+m)^2+(1+n*m*q)*(m^2+1/n/m/q)))			median (needed for optimization)
wet-to-humid	B1	1.29	0.18	0.19	20.65	9.1	61.9036	2188.67	0.028	35.3561	0.139535	0.440678	1.47	0.0273941	0.0258003	0.0342	0.0328
		1.35	0.21		20.44	9.1	61.9036	2188.67	0.028	35.3561	0.155556	0.445205	1.56	0.0261565		0.03
		1.39	0.18		20.39	9.1	61.9036	2188.67	0.028	35.3561	0.129496	0.446297	1.57	0.0254326		0.0355
		1.37	0.2		20.52	9.1	61.9036	2188.67	0.028	35.3561	0.145985	0.44347	1.57	0.0258003		0.0301
		1.39	0.19		20.4	9.1	61.9036	2188.67	0.028	35.3561	0.136691	0.446078	1.58	0.0254461		0.0335
		1.4	0.18		20.39	9.1	61.9036	2188.67	0.028	35.3561	0.128571	0.446297	1.58	0.0252477		0.0323
		1.36	0.19		20.4	9.1	61.9036	2188.67	0.028	35.3561	0.139706	0.446078	1.55	0.0260083		0.0328
	B2	1.24	0.39	0.4	21.25	9.1	61.9036	2188.67	0.028	35.3561	0.314516	0.428235	1.63	0.0255744	0.0244242	0.0253	0.0209
		1.31	0.4		21.09	9.1	61.9036	2188.67	0.028	35.3561	0.305344	0.431484	1.71	0.0244242		0.0213
		1.33	0.39		20.84	9.1	61.9036	2188.67	0.028	35.3561	0.293233	0.43666	1.72	0.0243324		0.0197
		1.31	0.35		20.83	9.1	61.9036	2188.67	0.028	35.3561	0.267176	0.43687	1.66	0.0252912		0.0209
		1.37	0.4		21.1	9.1	61.9036	2188.67	0.028	35.3561	0.291971	0.43128	1.77	0.0236572		0.0248
		1.35	0.42		21.04	9.1	61.9036	2188.67	0.028	35.3561	0.311111	0.43251	1.77	0.0235628		0.0186
		1.3	0.4		21.21	9.1	61.9036	2188.67	0.028	35.3561	0.307692	0.429043	1.7	0.0245596		0.0207
	B3	1.26	0.77	0.78	20.57	9.1	61.9036	2188.67	0.028	35.3561	0.611111	0.442392	2.03	0.0167369	0.0163756	0.0059	0.0073
		1.4	0.78		20.39	9.1	61.9036	2188.67	0.028	35.3561	0.557143	0.446297	2.18	0.016352		0.0064
		1.43	0.81		20.48	9.1	61.9036	2188.67	0.028	35.3561	0.566434	0.444336	2.24	0.0157972		0.0087
		1.36	0.77		20.31	9.1	61.9036	2188.67	0.028	35.3561	0.566176	0.448055	2.13	0.0165842		0.0073
		1.39	0.78		20.43	9.1	61.9036	2188.67	0.028	35.3561	0.561151	0.445423	2.17	0.0163756		0.0091
		1.4	0.77		20.4	9.1	61.9036	2188.67	0.028	35.3561	0.55	0.446078	2.17	0.0165344		0.0068
		1.36	0.8		20.36	9.1	61.9036	2188.67	0.028	35.3561	0.588235	0.446955	2.16	0.0160321		0.0077
	B4	1.33	1.22	1.2	20.51	9.1	61.9036	2188.67	0.028	35.3561	0.917293	0.443686	2.55	0.00966929	0.0101567	0.0036	0.0027
		1.38	1.2		20.39	9.1	61.9036	2188.67	0.028	35.3561	0.869565	0.446297	2.58	0.0100308		0.0027
		1.44	1.17		20.53	9.1	61.9036	2188.67	0.028	35.3561	0.8125	0.443254	2.61	0.0105729		0.0026
		1.47	1.2		20.48	9.1	61.9036	2188.67	0.028	35.3561	0.816327	0.444336	2.67	0.0102826		0.0027
	B5	1.43	1.61	1.655	20.33	9.1	61.9036	2188.67	0.028	35.3561	1.12587	0.447614	3.04	0.00649254	0.00627433	0.00074912	0.000735765
		1.46	1.69		20.33	9.1	61.9036	2188.67	0.028	35.3561	1.15753	0.447614	3.15	0.00606933		0.00066104
		1.45	1.65		20.33	9.1	61.9036	2188.67	0.028	35.3561	1.13793	0.447614	3.1	0.0062898		0.00093904
		1.5	1.63		20.28	9.1	61.9036	2188.67	0.028	35.3561	1.08667	0.448718	3.13	0.00655393		0.00063377
		1.47	1.66		20.19	9.1	61.9036	2188.67	0.028	35.3561	1.12925	0.450718	3.13	0.00625886		0.0011
		1.41	1.66		20.27	9.1	61.9036	2188.67	0.028	35.3561	1.1773	0.448939	3.07	0.00609509		0.00072241
	total median (needed for analytical curve and optimization)	1.38	x		20.43	9.1	61.9036	2188.67	0.028
wet-to-dry	B1	1.3	0.18	0.19	20.6	9.1	110.391	2467.95	0.037	22.3565	0.138462	0.441748	1.48	0.0343187	0.0334642	0.0479	0.0446
		1.34	0.21		20.42	9.1	110.391	2467.95	0.037	22.3565	0.156716	0.445642	1.55	0.0335182		0.0428
		1.39	0.18		20.35	9.1	110.391	2467.95	0.037	22.3565	0.129496	0.447174	1.57	0.031995		0.0452
		1.34	0.2		20.4	9.1	110.391	2467.95	0.037	22.3565	0.149254	0.446078	1.54	0.0334642		0.0422
		1.39	0.19		20.35	9.1	110.391	2467.95	0.037	22.3565	0.136691	0.447174	1.58	0.0321191		0.045
		1.39	0.18		20.32	9.1	110.391	2467.95	0.037	22.3565	0.129496	0.447835	1.57	0.0320013		0.0429
		1.33	0.19		20.33	9.1	110.391	2467.95	0.037	22.3565	0.142857	0.447614	1.52	0.0336593		0.0446
	B2	1.25	0.39	0.4	21.19	9.1	110.391	2467.95	0.037	22.3565	0.312	0.429448	1.64	0.0338344	0.0326356	0.0352	0.0305
		1.3	0.4		21.04	9.1	110.391	2467.95	0.037	22.3565	0.307692	0.43251	1.7	0.0326356		0.0307
		1.31	0.39		21.12	9.1	110.391	2467.95	0.037	22.3565	0.29771	0.430871	1.7	0.032611		0.03
		1.31	0.35		20.77	9.1	110.391	2467.95	0.037	22.3565	0.267176	0.438132	1.66	0.0332547		0.0305
		1.33	0.4		20.98	9.1	110.391	2467.95	0.037	22.3565	0.300752	0.433746	1.73	0.0320564		0.0345
		1.35	0.42		20.76	9.1	110.391	2467.95	0.037	22.3565	0.311111	0.438343	1.77	0.031352		0.0292
		1.29	0.4		20.87	9.1	110.391	2467.95	0.037	22.3565	0.310078	0.436033	1.69	0.032834		0.0301
	B3	1.33	0.77	0.78	20.48	9.1	110.391	2467.95	0.037	22.3565	0.578947	0.444336	2.1	0.0241439	0.0237466	0.0076	0.0111
		1.36	0.78		20.36	9.1	110.391	2467.95	0.037	22.3565	0.573529	0.446955	2.14	0.0237466		0.0086
		1.4	0.81		20.36	9.1	110.391	2467.95	0.037	22.3565	0.578571	0.446955	2.21	0.0229256		0.0121
		1.35	0.77		20.36	9.1	110.391	2467.95	0.037	22.3565	0.57037	0.446955	2.12	0.0240153		0.0111
		1.4	0.78		20.24	9.1	110.391	2467.95	0.037	22.3565	0.557143	0.449605	2.18	0.0235129		0.0125
		1.39	0.77		20.31	9.1	110.391	2467.95	0.037	22.3565	0.553957	0.448055	2.16	0.0237858		0.01
		1.34	0.8		20.29	9.1	110.391	2467.95	0.037	22.3565	0.597015	0.448497	2.14	0.0233966		0.0123
	B4	1.32	1.22	1.2	20.4	9.1	110.391	2467.95	0.037	22.3565	0.924242	0.446078	2.54	0.0154515	0.0158843	0.0054	0.00515
		1.37	1.2		20.35	9.1	110.391	2467.95	0.037	22.3565	0.875912	0.447174	2.57	0.0158679		0.0051
		1.42	1.17		20.41	9.1	110.391	2467.95	0.037	22.3565	0.823944	0.44586	2.59	0.016429		0.0052
		1.39	1.2		20.33	9.1	110.391	2467.95	0.037	22.3565	0.863309	0.447614	2.59	0.0159008		0.0029
	B5	1.36	1.62	1.64	20.21	9.1	110.391	2467.95	0.037	22.3565	1.19118	0.450272	2.98	0.0105447	0.0105617	0.0017	0.00195
		1.44	1.61		20.2	9.1	110.391	2467.95	0.037	22.3565	1.11806	0.450495	3.05	0.0109305		0.0012
		1.46	1.69		20.23	9.1	110.391	2467.95	0.037	22.3565	1.15753	0.449827	3.15	0.0102558		0.002
		1.45	1.65		20.19	9.1	110.391	2467.95	0.037	22.3565	1.13793	0.450718	3.1	0.0105787		0.0021
		1.47	1.63		20.12	9.1	110.391	2467.95	0.037	22.3565	1.10884	0.452286	3.1	0.0108157		0.0022
		1.47	1.66		20.12	9.1	110.391	2467.95	0.037	22.3565	1.12925	0.452286	3.13	0.0105344		0.0019
	total median (needed for analytical curve and optimization)	1.36	x		20.36	9.1	110.391	2467.95	0.037

## Sheet: Deflection linear
	Bilayer Measurements								Monolayer Measurements																	Calculated Deflection		Measured Curvature
Filament 2	Length		Thickness		Width		Weigth		Young's modulus		Stiffness ratio	Area			e	e1	e2	2nd moment of intertia			Ideal Bending stiffness	density		life load g	length L	w	MEDIAN w	w
	mm		mm		mm		mg		MPa			mm^2			mm	mm	mm	mm^4			Nmm^2	mg/mm^3		N/mm	mm	mm	mm	mm
	active	passive	active	passive	active	passive	active	passive	active	passive	pass-scaled/act	active	passive	ideal				active	passive	ideal	ideal	active	passive
B1	75.89	76.26	1.36	0.18	20.91	9.1	2266	139	9.65905	1785.38	184.84	28.4376	1.638	331.206	0.77	0.0661127	0.703887	4.38318	0.0044226	20.6136	199.108	1.04998	1.11277	0.000310798	73.075	5.56383	4.67845	7.515
	75.9	75.98	1.43	0.21	20.77		2309	140				29.7011	1.911	382.931	0.82	0.0636012	0.756399	5.06131	0.00702292	24.7815	239.365	1.02426	0.964202	0.000316512	72.94	4.67845		6.89
	75.6	75.9	1.45	0.18	20.68		2366	142				29.986	1.638	332.755	0.815	0.0734433	0.741557	5.2538	0.0044226	24.1939	233.69	1.0437	1.14218	0.00032537	72.75	4.87506		8.455
	75.67	76.02	1.44	0.2	20.75		2303	140				29.88	1.82	366.29	0.82	0.0668913	0.753109	5.16326	0.00606667	24.737	238.936	1.01857	1.01188	0.000316632	72.845	4.66425		8.04
	75.61	75.95	1.46	0.19	20.66		2343	144				30.1636	1.729	349.753	0.825	0.0711502	0.75385	5.35806	0.00520141	25.079	242.24	1.02733	1.09658	0.000322592	72.78	4.67053		8.975
	75.79	75.95	1.48	0.18	20.63		2359	141				30.5324	1.638	333.301	0.83	0.076033	0.753967	5.57318	0.0044226	25.4976	246.283	1.01942	1.13338	0.000323553	72.87	4.63038		8.665
	75.46	75.79	1.43	0.19	20.7		2262	141				29.601	1.729	349.19	0.81	0.068664	0.741336	5.04426	0.00520141	23.7806	229.698	1.01267	1.076	0.000312317	72.625	4.72817		10.02
B2	75.76	76.15	1.3	0.39	21.55		2257	286				28.015	3.549	684.014	0.845	0.0346085	0.810392	3.94545	0.0449836	31.4444	303.723	1.06341	1.05825	0.000329098	72.955	3.83688	3.42281	6.68
	75.78	76.13	1.38	0.4	21.36		2304	285				29.4768	3.64	702.296	0.89	0.0373551	0.852645	4.67797	0.0485333	36.0175	347.895	1.03145	1.02846	0.000334986	72.955	3.40964		6.16
	75.83	76.14	1.41	0.39	21.4		2364	280				30.174	3.549	686.173	0.9	0.0395769	0.860423	4.99908	0.0449836	36.68	354.294	1.03317	1.03619	0.000341902	72.985	3.42281		6.365
	76.03	76.34	1.37	0.35	21.38		2329	284				29.2906	3.185	618.008	0.86	0.0407599	0.81924	4.58129	0.0325135	31.2277	301.63	1.04582	1.16804	0.000337001	73.185	4.00641		5.535
	75.86	76.12	1.44	0.4	21.33		2357	282				30.7152	3.64	703.535	0.92	0.0401657	0.879834	5.30759	0.0485333	39.1409	378.063	1.01156	1.01777	0.000341143	72.99	3.20137		6.89
	75.88	76.28	1.42	0.42	21.2		2379	284				30.104	3.822	736.564	0.92	0.0376012	0.882399	5.05848	0.0561834	39.8821	385.223	1.04146	0.97413	0.000344088	73.08	3.18465		7.1
	75.92	76.17	1.37	0.4	21.37		2282	283				29.2769	3.64	702.096	0.885	0.0369039	0.848096	4.57915	0.0485333	35.5243	343.131	1.02668	1.02071	0.000331316	73.045	3.43601		5.845
B3	76.06	76.25	1.36	0.77	20.81		2297	569				28.3016	7.007	1323.48	1.065	0.0227742	1.04223	4.36222	0.346204	99.7687	963.671	1.06707	1.06498	0.000369466	73.155	1.37256	1.29639	4.385
	75.99	76.61	1.45	0.78	20.82		2348	573				30.189	7.098	1342.19	1.115	0.025079	1.08992	5.28936	0.359869	108.495	1047.96	1.02351	1.05374	0.000376491	73.3	1.29639		3.55
	75.86	76.13	1.48	0.81	20.62		2373	564				30.5176	7.371	1392.98	1.145	0.0250849	1.11992	5.57048	0.403009	119.196	1151.32	1.02503	1.00507	0.000379546	72.995	1.16991		3.86
	76.03	76.17	1.49	0.77	20.67		2354	571				30.7983	7.007	1325.98	1.13	0.0262464	1.10375	5.69794	0.346204	108.103	1044.18	1.0053	1.06984	0.000377272	73.1	1.28961		4.175
	77.16	76.14	1.46	0.78	20.69		2364	573				30.2074	7.098	1342.21	1.12	0.0252065	1.09479	5.36584	0.359869	108.923	1052.1	1.01424	1.06024	0.000374381	73.65	1.30876		3.65
	76.11	76.25	1.49	0.77	20.64		2383	572				30.7536	7.007	1325.93	1.13	0.0262092	1.10379	5.68967	0.346204	108.041	1043.57	1.01809	1.07059	0.000380742	73.18	1.30794		4.07
	75.92	76.11	1.41	0.8	20.67		2293	570				29.1447	7.28	1374.78	1.105	0.0234254	1.08157	4.82855	0.388267	111.428	1076.29	1.03631	1.02873	0.000369759	73.015	1.22053		3.445
B4	77.3	76.44	1.37	1.22	20.78		2291	861				28.4686	11.102	2080.57	1.295	0.0177196	1.27728	4.45273	1.37702	306.071	2956.35	1.04107	1.01457	0.000401244	73.87	0.505167	0.517471	3.235
	76.48	76.53	1.47	1.2	20.66		2369	864				30.3702	10.92	2048.83	1.335	0.019789	1.31521	5.46891	1.3104	301.008	2907.45	1.01993	1.03385	0.000414621	73.505	0.520374		2.82
	77.2	76.14	1.5	1.17	20.71		2392	838				31.065	10.647	1999.06	1.335	0.0207456	1.31425	5.82469	1.21456	284.828	2751.17	0.997407	1.03372	0.000411927	73.67	0.551284		2.09
	76.81	76.18	1.45	1.2	20.53		2367	861				29.7685	10.92	2048.23	1.325	0.0192573	1.30574	5.21569	1.3104	298.933	2887.41	1.0352	1.035	0.000413182	73.495	0.521884		1.98
	77.02	76.29	1.52	1.2	20.72		2398	854				31.4944	10.92	2049.95	1.36	0.0208943	1.33911	6.06372	1.3104	305.636	2952.15	0.988581	1.0251	0.000415246	73.655	0.517471		2.19
	77.1	76.25	1.5	1.21	20.75		2428	861				31.125	11.011	2066.4	1.355	0.0204096	1.33459	5.83594	1.34343	310.442	2998.58	1.01178	1.0255	0.000419705	73.675	0.515489		2.925
	76.36	76.08	1.45	1.21	20.68		2331	855				29.986	11.011	2065.26	1.33	0.0193105	1.31069	5.2538	1.34343	305.847	2954.19	1.01802	1.02063	0.000409711	73.22	0.498274		2.715
B5	77.6	76.35	1.42	1.62	20.54		2323	1141				29.1668	14.742	2754.09	1.52	0.0160974	1.5039	4.90099	3.22408	667.514	6447.55	1.02636	1.01373	0.000440272	73.975	0.255609	0.241081	1.67
	77.17	76.35	1.53	1.61	20.49		2386	1143				31.3497	14.651	2739.45	1.57	0.0179668	1.55203	6.11554	3.16474	667.477	6447.19	0.986253	1.02181	0.000450174	73.76	0.258347		2.4
	76.86	76.2	1.57	1.69	20.57		2430	1119				32.2949	15.379	2874.96	1.63	0.0183101	1.61169	6.63364	3.66033	768.051	7418.65	0.978976	0.954876	0.000454212	73.53	0.223719		3.44
	77.25	76.21	1.57	1.65	20.48		2417	1135				32.1536	15.015	2807.53	1.61	0.0184387	1.59156	6.60462	3.40653	718.66	6941.57	0.97308	0.991879	0.000453036	73.73	0.241081		3.025
	77.08	76.19	1.59	1.63	20.35		2409	1143				32.3565	14.833	2774.1	1.61	0.0187787	1.59122	6.81671	3.28415	696.754	6729.98	0.965903	1.01139	0.000453764	73.635	0.247778		2.295
	77.06	76.5	1.58	1.66	20.37		2422	1145				32.1846	15.106	2824.38	1.62	0.0184603	1.60154	6.69547	3.46884	731.38	7064.44	0.976556	0.99082	0.000455158	73.78	0.238643		2.92
	76.36	76.19	1.51	1.66	20.41		2357	1139				30.8191	15.106	2823.02	1.585	0.0173036	1.5677	5.85589	3.46884	723.617	6989.46	1.00155	0.989638	0.000449459	73.275	0.231729		1.67
total median (needed for analytical curve)	76.03	76.18	1.45	thk_1	20.69	9.1			9.65905	1785.38												1.01993	1.02846
