# Supplementary material for: Development of a Material Design Space for 4D-Printed Bio-Inspired Hygroscopically Actuated Bilayer Structures with Unequal Effective Layer Widths
Source: Biomimetics (Basel). 2021 Oct 6;6(4):58. doi: 10.3390/biomimetics6040058 (PMC8544213; doi:10.3390/biomimetics6040058)
Supplement: Supplementary file 1 [file biomimetics-06-00058-s001.zip › Krueger_Thierer_et_al/Raw_Values_Bilayers_C.xlsx]

## Sheet: Deflection
	Deflection [mm] - measured in wet state
Experiment C	Bilayer						Monolayer active Material						Monolayer passive Material
Sample	C1	C2	C3	C4	C5		C1	C2	C3	C4	C5		C1	C2	C3	C4	C5
	6.265	6.26	7.2	6.47	11.25		18.89	20.05	27.31	27.31	24.24		4.125	4.62	7.015	6.435	5.775
	6.885	6.47	6.89	7.1	5.3		20.045	22.195	27.97	23.27	34.16		4.785	4.045	5.61	7.26	7.975
	6.78	7.825	6.475	5.95	14.45		19.22	23.6	24.425	21.7	27.88		4.04	5.61	7.505	6.435	7.85
	6.89	7.935	6.1	7.935	7.115		22.275	20.79	25	25.245	26.75		4.62	4.045	6.27	6.02	7.785
	7.08	6.265	6.475	8.19	9.565		25.825	26.405	25.74	28.96	30.015		4.785	3.465	6.35	7.015	9.67
	6.535	6.055	6.89	8.56	16.36		27.145	28.545	29.375	28.88	21.225		4.62	4.125	5.03	5.53	7.095
	6.68	6.26	7.62	7.93			27.805	25.745	27.56	29.205			4.62	3.215	9.325	4.445
Median	6.78	6.265	6.89	7.93	10.4075		22.275	23.6	27.31	27.31	27.315		4.62	4.045	6.35	6.435	7.8175

## Sheet: Curvature
	Curvature (mm^-1) - measured in humid and dry state
Experiment C	Bilayer humid						Bilayer dry
	C1	C2	C3	C4	C5		C1	C2	C3	C4	C5
	0.0246	0.0334	0.0329	0.0341	0.0445		0.036	0.0491	0.0431	0.0452	0.0525
	0.0243	0.0314	0.0327	0.032	0.0475		0.0375	0.0462	0.0427	0.0432	0.0547
	0.025	0.03	0.0288	0.0295	0.0439		0.0368	0.0422	0.0435	0.0419	0.0517
	0.0237	0.0301	0.03	0.0277	0.0462		0.0358	0.045	0.0418	0.0399	0.0533
	0.025	0.0282	0.0329	0.0357	0.0424		0.0373	0.0426	0.0437	0.047	0.0493
	0.0285	0.0323	0.0338	0.0335	0.0451		0.0403	0.0451	0.0452	0.046	0.0517
	0.0236	0.0292	0.0311	0.035	0.0424		0.0326	0.0425	0.0433	0.0481
Median	0.0246	0.0301	0.0327	0.0335	0.0445		0.0368	0.045	0.0433	0.0452	0.0521

## Sheet: Layer Length
	Length (mm) - measured in all states
Experiment C	Monolayer active Material wet						Monolayer active Material humid - Length						Monolayer active Material dry - Length
	C1	C2	C3	C4	C5		C1	C2	C3	C4	C5		C1	C2	C3	C4	C5
	75.25	75.01	75.2	75.04	75.6		73.15	72.73	73.28	73.01	73.65		72.83	72.57	73.03	72.88	73.02
	75.29	75.2	75.26	75.32	75.89		73.44	72.99	73.29	73.12	73.46		73.08	72.66	73.05	73.11	73.06
	75.32	75.23	75.33	75.38	75.73		73.36	72.72	73.3	73.08	73.76		73.08	73.01	73.12	73.31	73.04
	75.2	75.04	75.36	75.33	75.63		73.39	72.81	73.5	73.28	73.5		72.95	72.68	73.18	73.1	73.14
	75.07	75.11	75.08	75.26	75.88		73.32	72.87	72.7	72.87	73.6		72.93	72.72	72.78	73.09	73.16
	75.09	74.92	75.21	75.19	75.6		73	72.74	72.96	72.8	73.38		72.78	72.74	72.83	72.88	73.12
	75	74.98	75.44	75.16			73.28	72.82	73.09	73			72.87	72.62	72.88	72.85
Median	75.2	75.04	75.26	75.26	75.68		73.32	72.81	73.28	73.01	73.55		72.93	72.68	73.03	73.09	73.09
IQR	0.19	0.16	0.14	0.15	0.235		0.16	0.11	0.27	0.165	0.1675		0.165	0.09	0.23	0.225	0.09
							Monolayer active Material humid - Length change						Monolayer active Material dry - Length change
							B1	B2	B3	B4	B5		B1	B2	B3	B4	B5
							0.972093	0.969604	0.974468	0.972948	0.974206		0.967841	0.967471	0.971144	0.971215	0.965873
							0.975428	0.970612	0.973824	0.970791	0.96798		0.970647	0.966223	0.970635	0.970659	0.962709
							0.973978	0.966636	0.973052	0.969488	0.973987		0.97026	0.97049	0.970662	0.972539	0.964479
							0.975931	0.970283	0.975318	0.972786	0.971837		0.97008	0.96855	0.971072	0.970397	0.967077
							0.976688	0.970177	0.9683	0.968243	0.969953		0.971493	0.96818	0.969366	0.971167	0.964154
							0.972167	0.970902	0.970084	0.968214	0.970635		0.969237	0.970902	0.968355	0.969278	0.967196
							0.977067	0.971192	0.968849	0.971261			0.9716	0.968525	0.966066	0.969266
							0.975428	0.970283	0.973052	0.970791	0.971236		0.97026	0.968525	0.970635	0.970659	0.965176

## Sheet: Layer Thickness
	Thickness (mm) - measured in all states
Experiment C	Monolayer active Material wet						Monolayer active Material humid						Monolayer active Material dry
	C1	C2	C3	C4	C5		C1	C2	C3	C4	C5		C1	C2	C3	C4	C5
	1.45	1.4	1.5	1.5	1.35		1.37	1.33	1.4	1.48	1.26		1.38	1.32	1.4	1.47	1.26
	1.42	1.4	1.47	1.54	1.45		1.34	1.3	1.43	1.43	1.38		1.34	1.31	1.39	1.42	1.42
	1.45	1.43	1.5	1.56	1.43		1.34	1.33	1.41	1.52	1.34		1.37	1.34	1.42	1.47	1.36
	1.47	1.43	1.48	1.54	1.4		1.4	1.35	1.45	1.53	1.34		1.37	1.34	1.42	1.45	1.33
	1.47	1.41	1.49	1.56	1.36		1.37	1.32	1.46	1.53	1.32		1.35	1.31	1.41	1.45	1.31
	1.49	1.44	1.52	1.56	1.36		1.35	1.35	1.49	1.52	1.31		1.37	1.36	1.42	1.44	1.3
	1.44	1.4	1.5	1.53			1.35	1.33	1.45	1.52			1.35	1.3	1.4	1.44
Median	1.45	1.41	1.5	1.54	1.38		1.35	1.33	1.45	1.52	1.33		1.37	1.32	1.41	1.45	1.32
IQR	0.025	0.03	0.015	0.025	0.0625		0.025	0.015	0.035	0.025	0.0275		0.02	0.03	0.02	0.02	0.05
							Monolayer active Material humid - change						Monolayer active Material dry - change
							B1	B2	B3	B4	B5		B1	B2	B3	B4	B5
							0.944828	0.95	0.933333	0.986667	0.933333		0.951724	0.942857	0.933333	0.98	0.933333
							0.943662	0.928571	0.972789	0.928571	0.951724		0.943662	0.935714	0.945578	0.922078	0.97931
							0.924138	0.93007	0.94	0.974359	0.937063		0.944828	0.937063	0.946667	0.942308	0.951049
							0.952381	0.944056	0.97973	0.993506	0.957143		0.931973	0.937063	0.959459	0.941558	0.95
							0.931973	0.93617	0.979866	0.980769	0.970588		0.918367	0.929078	0.946309	0.929487	0.963235
							0.90604	0.9375	0.980263	0.974359	0.963235		0.919463	0.944444	0.934211	0.923077	0.955882
							0.9375	0.95	0.966667	0.993464			0.9375	0.928571	0.933333	0.941176
							0.9375	0.9375	0.972789	0.980769	0.954433		0.9375	0.937063	0.945578	0.941176	0.953466

## Sheet: Layer Width
	Width (mm) - measured in all states
Experiment C	Monolayer active Material wet						Monolayer active Material humid						Monolayer active Material dry
	C1	C2	C3	C4	C5		C1	C2	C3	C4	C5		C1	C2	C3	C4	C5
	20.8	21.25	20.58	20.6	21.47		20.48	21.03	20.31	20.34	20.95		20.45	20.93	20.22	20.15	20.81
	20.83	21.44	20.52	20.6	20.41		20.52	21.24	20.41	20.31	20		20.43	21.09	20.27	20.22	19.92
	20.9	21.57	20.83	20.85	20.4		20.64	21.19	20.56	20.59	20.13		20.54	21.08	20.45	20.43	20
	20.86	21.28	20.55	20.45	20.41		20.76	20.95	20.47	20.35	20.15		20.36	20.91	20.33	20.18	20.06
	20.65	21.2	20.43	20.55	21.03		20.51	20.97	20.24	20.29	20.81		20.39	20.85	20.16	20.26	20.63
	20.72	21.22	20.4	20.49	20.48		20.53	20.96	20.29	20.09	20.31		20.44	20.9	20.14	20.06	20.12
	20.8	21.2	20.42	20.43			20.46	20.9	20.28	20.3			20.38	20.84	20.08	20.13
Median	20.8	21.25	20.52	20.55	20.445		20.52	20.97	20.31	20.31	20.23		20.43	20.91	20.22	20.18	20.09
IQR	0.085	0.15	0.14	0.13	0.4825		0.09	0.155	0.155	0.05	0.55		0.06	0.13	0.15	0.1	0.4875
							Monolayer active Material humid - change						Monolayer active Material dry - change
							B1	B2	B3	B4	B5		B1	B2	B3	B4	B5
							0.984615	0.989647	0.98688	0.987379	0.97578		0.983173	0.984941	0.982507	0.978155	0.969259
							0.985118	0.990672	0.994639	0.985922	0.979912		0.980797	0.983675	0.987817	0.981553	0.975992
							0.98756	0.982383	0.987038	0.98753	0.986765		0.982775	0.977283	0.981757	0.979856	0.980392
							0.995206	0.984492	0.996107	0.99511	0.987261		0.976031	0.982613	0.989294	0.986797	0.982852
							0.99322	0.989151	0.9907	0.987348	0.989539		0.987409	0.983491	0.986784	0.985888	0.98098
							0.99083	0.987747	0.994608	0.980478	0.991699		0.986486	0.98492	0.987255	0.979014	0.982422
							0.983654	0.985849	0.993144	0.993637			0.979808	0.983019	0.98335	0.985316
							0.98756	0.987747	0.993144	0.987379	0.987013		0.982775	0.983491	0.986784	0.981553	0.980686

## Sheet: Layer Weight
	Weight (mm) - measured in all states
Experiment C	Monolayer active Material wet						Monolayer active Material humid						Monolayer active Material dry
	C1	C2	C3	C4	C5		C1	C2	C3	C4	C5		C1	C2	C3	C4	C5
	2300	2311	2354	2396	2211		1207	1225	1175	1190	1135		1163	1179	1146	1148	1090
	2263	2298	2339	2360	2274		1205	1212	1191	1178	1118		1165	1173	1146	1141	1071
	2314	2340	2345	2397	2262		1219	1228	1199	1210	1123		1181	1189	1165	1171	1081
	2304	2328	2366	2404	2229		1228	1217	1199	1193	1121		1189	1180	1162	1157	1074
	2289	2297	2329	2362	2266		1181	1172	1162	1168	1129		1142	1151	1126	1131	1082
	2320	2334	2372	2390	2200		1183	1182	1173	1159	1129		1158	1146	1129	1124	1084
	2299	2275	2328	2346			1172	1170	1164	1167			1137	1135	1117	1120
Median	2300	2311	2345	2390	2245.5		1205	1212	1175	1178	1126		1141	1173	1146	1141	1081.5
	Density (mg/mm^3) - measured in all states
	Monolayer active Material wet						Monolayer active Material humid						Monolayer active Material dry
	C1	C2	C3	C4	C5		C1	C2	C3	C4	C5		C1	C2	C3	C4	C5
	1.01342	1.0356	1.01403	1.03332	1.00902		0.588088	0.602187	0.563916	0.541442	0.583806		0.558546	0.588049	0.554337	0.531791	0.569301
	1.01618	1.01807	1.03032	0.987674	1.0125		0.596722	0.601369	0.556786	0.554706	0.551419		0.570314	0.584325	0.556796	0.54355	0.518241
	1.01377	1.00841	0.99631	0.977645	1.0239		0.6008	0.599186	0.564252	0.529038	0.56443		0.569426	0.576533	0.548666	0.531873	0.544122
	0.999155	1.01949	1.03229	1.01333	1.03144		0.575713	0.590992	0.549599	0.522877	0.564857		0.568604	0.57944	0.550032	0.540912	0.550385
	1.00448	1.02308	1.01904	0.978992	1.04413		0.573246	0.581041	0.540889	0.516322	0.558432		0.563385	0.579488	0.544273	0.526741	0.547247
	1.00076	1.01952	1.0171	0.994423	1.0448		0.584708	0.574274	0.531796	0.521349	0.578276		0.551509	0.554276	0.542046	0.533906	0.566789
	1.02342	1.02229	1.00748	0.998577			0.579032	0.578013	0.541576	0.518094			0.558639	0.576897	0.545197	0.530374
	1.01342	1.01952	1.0171	0.994423	1.02767		0.584708	0.590992	0.549599	0.522877	0.564644		0.563385	0.57944	0.548666	0.531873	0.548816
IQR	0.0123523	0.00389956	0.0139244	0.0226219	0.0256075		0.0150325	0.0207513	0.0191184	0.0155186	0.0149897		0.0104222	0.00519132	0.00745	0.00632638	0.0177855
							Monolayer active Material humid - change						Monolayer active Material dry - change
							B1	B2	B3	B4	B5		B1	B2	B3	B4	B5
							0.5803	0.581484	0.556112	0.523982	0.578585		0.551149	0.567832	0.546666	0.514642	0.56421
							0.587222	0.590693	0.540402	0.561629	0.544612		0.561234	0.573952	0.540411	0.550333	0.511844
							0.59264	0.594187	0.566342	0.541135	0.551254		0.561692	0.571723	0.550698	0.544035	0.53142
							0.5762	0.579695	0.532409	0.515996	0.547638		0.569084	0.568363	0.532829	0.533795	0.533607
							0.570689	0.567934	0.530784	0.527401	0.53483		0.560872	0.566416	0.534104	0.538044	0.524117
							0.584264	0.563279	0.522853	0.524273	0.553481		0.551091	0.543664	0.53293	0.5369	0.542488
							0.565784	0.565412	0.537557	0.518832	#DIV/0!		0.545858	0.564321	0.541151	0.53113	#DIV/0!
							0.5803	0.579695	0.537557	0.524273	#DIV/0!		0.560872	0.567832	0.540411	0.5369	#DIV/0!

## Sheet: passive Layer Geometry
	No change with states
	Monolayer passive Material
Experiment C	Length (mm)		measured width (mm)						Thickness (mm)						Weight (mg)
	all samples		C1	C2	C3	C4	C5		C1	C2	C3	C4	C5		C1	C2	C3	C4	C5
	76.09		20.43	19.9	13	8.45	4.55		0.23	0.26	0.21	0.22	0.22		395	338	205	134	73
	76.01		20.4	19.92					0.24	0.25	0.22	0.19	0.21		396	336	206	132	71
	76		20.5	19.96					0.24	0.25	0.19	0.2	0.21		396	335	208	134	71
	76.05		20.44	19.87					0.25	0.24	0.2	0.22	0.23		389	329	207	145	72
	76.04		20.47	20.02					0.25	0.25	0.2	0.23	0.22		395	333	215	135	72
	76		20.44	19.98					0.26	0.25	0.21	0.2	0.2		395	337	208	134	73
	75.98		20.43	20.02					0.24	0.27	0.18	0.19			419	341	207	135
	76.17
	76.2
	76.14		20.44	19.96	13	8.45	4.55		0.24	0.25	0.2	0.2	0.215		395	336	207	134	72
	76.14
	76.16
	76.14
	76.15
	76.12
	76.08
	76.05
	76.18
	76.15
	76.08
	76.13
	76.01
	75.9
	76.02
	75.95
	76.01
	75.8
	75.99
	75.94
	75.77
	75.85
	75.92
	75.88
	75.89
	76.03

## Sheet: Curvature Timoshenko
		Bilayer Measurements					Monolayer Measurements							Calculated Curvature		Measured Curvature
Filament 2		Thickness		Width			Young's modulus		Elongation	Stiffness ratio	Thickness ratio	Width ratio	Total thickness	kappa	MEDIAN kappa	kappa
		mm		mm			MPa						mm	1/mm	1/mm	1/mm
		active	passive	active	passive	median (needed for optimization)	active	passive	alpha_T_2	n	m	q	h	6*alpha_T_2*(1+m)^2/(h*(3*(1+m)^2+(1+n*m*q)*(m^2+1/n/m/q)))			median (needed for optimization)
wet-to-humid	C1	1.37	0.23	20.48	20.43	20.44	61.9036	2188.67	0.028	35.3561	0.167883	0.997559	1.6	0.02625	0.02625	0.0246	0.0246
		1.34	0.24	20.52	20.4		61.9036	2188.67	0.028	35.3561	0.179104	0.994152	1.58	0.0265699		0.0243
		1.34	0.24	20.64	20.5		61.9036	2188.67	0.028	35.3561	0.179104	0.993217	1.58	0.0265701		0.025
		1.4	0.25	20.76	20.44		61.9036	2188.67	0.028	35.3561	0.178571	0.984586	1.65	0.0254456		0.0237
		1.37	0.25	20.51	20.47		61.9036	2188.67	0.028	35.3561	0.182482	0.99805	1.62	0.0259039		0.025
		1.35	0.26	20.53	20.44		61.9036	2188.67	0.028	35.3561	0.192593	0.995616	1.61	0.0260239		0.0285
		1.35	0.24	20.46	20.43		61.9036	2188.67	0.028	35.3561	0.177778	0.998534	1.59	0.0264049		0.0236
	C2	1.33	0.26	21.03	19.9	19.96	61.9036	2188.67	0.028	35.3561	0.195489	0.946267	1.59	0.0263604	0.0264122	0.0334	0.0301
		1.3	0.25	21.24	19.92		61.9036	2188.67	0.028	35.3561	0.192308	0.937853	1.55	0.0270586		0.0314
		1.33	0.25	21.19	19.96		61.9036	2188.67	0.028	35.3561	0.18797	0.941954	1.58	0.0265588		0.03
		1.35	0.24	20.95	19.87		61.9036	2188.67	0.028	35.3561	0.177778	0.948449	1.59	0.0264122		0.0301
		1.32	0.25	20.97	20.02		61.9036	2188.67	0.028	35.3561	0.189394	0.954697	1.57	0.0267188		0.0282
		1.35	0.25	20.96	19.98		61.9036	2188.67	0.028	35.3561	0.185185	0.953244	1.6	0.0262318		0.0323
		1.33	0.27	20.9	20.02		61.9036	2188.67	0.028	35.3561	0.203008	0.957895	1.6	0.0261471		0.0292
	C3	1.4	0.21	20.31	13	13	61.9036	2188.67	0.028	35.3561	0.15	0.640079	1.61	0.0257416	0.0250218	0.0329	0.0327
		1.43	0.22	20.41	13		61.9036	2188.67	0.028	35.3561	0.153846	0.636943	1.65	0.0251572		0.0327
		1.41	0.19	20.56	13		61.9036	2188.67	0.028	35.3561	0.134752	0.632296	1.6	0.0256662		0.0288
		1.45	0.2	20.47	13		61.9036	2188.67	0.028	35.3561	0.137931	0.635076	1.65	0.0249443		0.03
		1.46	0.2	20.24	13		61.9036	2188.67	0.028	35.3561	0.136986	0.642292	1.66	0.0247936		0.0329
		1.49	0.21	20.29	13		61.9036	2188.67	0.028	35.3561	0.14094	0.64071	1.7	0.0242643		0.0338
		1.45	0.18	20.28	13		61.9036	2188.67	0.028	35.3561	0.124138	0.641026	1.63	0.0250218		0.0311
	C4	1.48	0.22	20.34	8.45	8.45	61.9036	2188.67	0.028	35.3561	0.148649	0.415438	1.7	0.023765	0.0230944	0.0341	0.0335
		1.43	0.19	20.31	8.45		61.9036	2188.67	0.028	35.3561	0.132867	0.416051	1.62	0.0245831		0.032
		1.52	0.2	20.59	8.45		61.9036	2188.67	0.028	35.3561	0.131579	0.410393	1.72	0.0230944		0.0295
		1.53	0.22	20.35	8.45		61.9036	2188.67	0.028	35.3561	0.143791	0.415233	1.75	0.0229905		0.0277
		1.53	0.23	20.29	8.45		61.9036	2188.67	0.028	35.3561	0.150327	0.416461	1.76	0.02299		0.0357
		1.52	0.2	20.09	8.45		61.9036	2188.67	0.028	35.3561	0.131579	0.420607	1.72	0.0231453		0.0335
		1.52	0.19	20.3	8.45		61.9036	2188.67	0.028	35.3561	0.125	0.416256	1.71	0.0230912		0.035
	C5	1.26	0.22	20.95	4.55	4.55	61.9036	2188.67	0.028	35.3561	0.174603	0.217184	1.48	0.0262938	0.0249455	0.0445	0.0448
		1.38	0.21	20	4.55		61.9036	2188.67	0.028	35.3561	0.152174	0.2275	1.59	0.0239728		0.0475
		1.34	0.21	20.13	4.55		61.9036	2188.67	0.028	35.3561	0.156716	0.226031	1.55	0.0247149		0.0439
		1.34	0.23	20.15	4.55		61.9036	2188.67	0.028	35.3561	0.171642	0.225806	1.57	0.0248221		0.0462
		1.32	0.22	20.81	4.55		61.9036	2188.67	0.028	35.3561	0.166667	0.218645	1.54	0.025069		0.0424
		1.31	0.2	20.31	4.55		61.9036	2188.67	0.028	35.3561	0.152672	0.224028	1.51	0.025207		0.0451
	total median (needed for analytical curve and optimization)	1.37	0.22	20.475	x		61.9036	2188.67	0.028
wet-to-dry	C1	1.38	0.23	20.45	20.43	20.44	110.391	2467.95	0.037	22.3565	0.166667	0.999022	1.61	0.0342287	0.0343141	0.036	0.0368
		1.34	0.24	20.43	20.4		110.391	2467.95	0.037	22.3565	0.179104	0.998532	1.58	0.0349997		0.0375
		1.37	0.24	20.54	20.5		110.391	2467.95	0.037	22.3565	0.175182	0.998053	1.61	0.0343141		0.0368
		1.37	0.25	20.36	20.44		110.391	2467.95	0.037	22.3565	0.182482	1.00393	1.62	0.0341641		0.0358
		1.35	0.25	20.39	20.47		110.391	2467.95	0.037	22.3565	0.185185	1.00392	1.6	0.0346089		0.0373
		1.37	0.26	20.44	20.44		110.391	2467.95	0.037	22.3565	0.189781	1	1.63	0.0339954		0.0403
		1.35	0.24	20.38	20.43		110.391	2467.95	0.037	22.3565	0.177778	1.00245	1.59	0.0347718		0.0326
	C2	1.32	0.26	20.93	19.9	19.96	110.391	2467.95	0.037	22.3565	0.19697	0.950788	1.58	0.0350816	0.0350816	0.0491	0.045
		1.31	0.25	21.09	19.92		110.391	2467.95	0.037	22.3565	0.19084	0.944523	1.56	0.0354941		0.0462
		1.34	0.25	21.08	19.96		110.391	2467.95	0.037	22.3565	0.186567	0.946869	1.59	0.0347973		0.0422
		1.34	0.24	20.91	19.87		110.391	2467.95	0.037	22.3565	0.179104	0.950263	1.58	0.034959		0.045
		1.31	0.25	20.85	20.02		110.391	2467.95	0.037	22.3565	0.19084	0.960192	1.56	0.0355042		0.0426
		1.36	0.25	20.9	19.98		110.391	2467.95	0.037	22.3565	0.183824	0.955981	1.61	0.0343517		0.0451
		1.3	0.27	20.84	20.02		110.391	2467.95	0.037	22.3565	0.207692	0.960653	1.57	0.035343		0.0425
	C3	1.4	0.21	20.22	13	13	110.391	2467.95	0.037	22.3565	0.15	0.642928	1.61	0.0331418	0.0329164	0.0431	0.0433
		1.39	0.22	20.27	13		110.391	2467.95	0.037	22.3565	0.158273	0.641342	1.61	0.0333476		0.0427
		1.42	0.19	20.45	13		110.391	2467.95	0.037	22.3565	0.133803	0.635697	1.61	0.0326178		0.0435
		1.42	0.2	20.33	13		110.391	2467.95	0.037	22.3565	0.140845	0.639449	1.62	0.0326602		0.0418
		1.41	0.2	20.16	13		110.391	2467.95	0.037	22.3565	0.141844	0.644841	1.61	0.0329164		0.0437
		1.42	0.21	20.14	13		110.391	2467.95	0.037	22.3565	0.147887	0.645482	1.63	0.0326879		0.0452
		1.4	0.18	20.08	13		110.391	2467.95	0.037	22.3565	0.128571	0.64741	1.58	0.0331058		0.0433
	C4	1.47	0.22	20.15	8.45	8.45	110.391	2467.95	0.037	22.3565	0.14966	0.419355	1.69	0.0302916	0.0307244	0.0452	0.0452
		1.42	0.19	20.22	8.45		110.391	2467.95	0.037	22.3565	0.133803	0.417903	1.61	0.0311154		0.0432
		1.47	0.2	20.43	8.45		110.391	2467.95	0.037	22.3565	0.136054	0.413607	1.67	0.0300546		0.0419
		1.45	0.22	20.18	8.45		110.391	2467.95	0.037	22.3565	0.151724	0.418731	1.67	0.0307244		0.0399
		1.45	0.23	20.26	8.45		110.391	2467.95	0.037	22.3565	0.158621	0.417078	1.68	0.0307663		0.047
		1.44	0.2	20.06	8.45		110.391	2467.95	0.037	22.3565	0.138889	0.421236	1.64	0.0308018		0.046
		1.44	0.19	20.13	8.45		110.391	2467.95	0.037	22.3565	0.131944	0.419771	1.63	0.0306668		0.0481
	C5	1.26	0.22	20.81	4.55	4.55	110.391	2467.95	0.037	22.3565	0.174603	0.218645	1.48	0.0325029	0.031061	0.0525	0.0521
		1.42	0.21	19.92	4.55		110.391	2467.95	0.037	22.3565	0.147887	0.228414	1.63	0.0284156		0.0547
		1.36	0.21	20	4.55		110.391	2467.95	0.037	22.3565	0.154412	0.2275	1.57	0.0298455		0.0517
		1.33	0.23	20.06	4.55		110.391	2467.95	0.037	22.3565	0.172932	0.22682	1.56	0.0309597		0.0533
		1.31	0.22	20.63	4.55		110.391	2467.95	0.037	22.3565	0.167939	0.220553	1.53	0.0311624		0.0493
		1.3	0.2	20.12	4.55		110.391	2467.95	0.037	22.3565	0.153846	0.226143	1.5	0.0311685		0.0517
	total median (needed for analytical curve and optimization)	1.37	0.22	20.37	x		110.391	2467.95	0.037

## Sheet: Deflections linear
	Bilayer Measurements								Monolayer Measurements																	Calculated Deflection		Measured Curvature
Filament 2	Length		Thickness		Width		Weigth		Young's modulus		Stiffness ratio	Area			e	e1	e2	2nd moment of intertia			Ideal Bending stiffness	density		life load g	length L	w	MEDIAN w	w
	mm		mm		mm		mg		MPa			mm^2			mm	mm	mm	mm^4			Nmm^2	mg/mm^3		N/mm	mm	mm	mm	mm
	active	passive	active	passive	active	passive	active	passive	active	passive	pass-scaled/act	active	passive	ideal				active	passive	ideal	ideal	active	passive
C1	75.25	76.09	1.45	0.23	20.8	20.43	2300	395	9.65905	1785.38	184.84	30.16	4.6989	898.707	0.84	0.0281898	0.81181	5.28428	0.0207143	29.6799	286.679	1.01342	1.10477	0.000350766	72.67	4.26533	4.15312	6.265
	75.29	76.01	1.42	0.24	20.83	20.4	2263	396				29.5786	4.896	934.558	0.83	0.0262694	0.803731	4.97019	0.0235008	29.0459	280.555	1.01618	1.0641	0.000345969	72.65	4.29409		6.885
	75.32	76	1.45	0.24	20.9	20.5	2314	396				30.305	4.92	939.72	0.845	0.0272504	0.81775	5.30969	0.023616	30.6156	295.718	1.01377	1.05905	0.000352501	72.66	4.15312		6.78
	75.2	76.05	1.47	0.25	20.86	20.44	2304	389				30.6642	5.11	975.199	0.86	0.0270419	0.832958	5.52186	0.0266146	32.4074	313.025	0.999155	1.00099	0.00035074	72.625	3.89638		6.89
	75.07	76.04	1.47	0.25	20.65	20.47	2289	395				30.3555	5.1175	976.277	0.86	0.0267401	0.83326	5.46627	0.0266536	32.1458	310.498	1.00448	1.01507	0.000350081	72.555	3.90562		7.08
	75.09	76	1.49	0.26	20.72	20.44	2320	395				30.8728	5.3144	1013.19	0.875	0.0266621	0.848338	5.71173	0.0299378	34.1622	329.974	1.00076	0.977978	0.000354078	72.545	3.715		6.535
	75	75.98	1.44	0.24	20.8	20.43	2299	419				29.952	4.9032	936.262	0.84	0.0268725	0.813128	5.17571	0.0235354	29.984	289.617	1.02342	1.1247	0.000354808	72.49	4.22854		6.68
C2	75.01	76.17	1.4	0.26	21.25	19.9	2311	338				29.75	5.174	986.115	0.83	0.0250402	0.80496	4.85917	0.0291469	30.1232	290.961	1.0356	0.857643	0.00034577	72.59	4.12448	4.12448	6.26
	75.2	76.2	1.4	0.25	21.44	19.92	2298	336				30.016	4.98	950.522	0.825	0.0260522	0.798948	4.90261	0.0259375	29.4814	284.762	1.01807	0.885431	0.000343036	72.7	4.20634		6.47
	75.23	76.14	1.43	0.25	21.57	19.96	2340	335				30.8451	4.99	953.199	0.84	0.027182	0.812818	5.25626	0.0259896	31.1202	300.592	1.00841	0.881721	0.000348298	72.685	4.04263		7.825
	75.04	76.14	1.43	0.24	21.28	19.87	2328	329				30.4304	4.7688	911.898	0.835	0.0278643	0.807136	5.18559	0.0228902	29.9255	289.051	1.01949	0.906095	0.000346729	72.59	4.16325		7.935
	75.11	76.16	1.41	0.25	21.2	20.02	2297	333				29.892	5.005	955.019	0.83	0.0259789	0.804021	4.95236	0.0260677	29.7188	287.055	1.02308	0.873601	0.000342901	72.635	4.1562		6.265
	74.92	76.14	1.44	0.25	21.22	19.98	2334	337				30.5568	4.995	953.835	0.845	0.0270702	0.81793	5.28022	0.0260156	31.2083	301.443	1.01952	0.886098	0.000349033	72.53	4.00537		6.055
	74.98	76.15	1.4	0.27	21.2	20.02	2275	341				29.68	5.4054	1028.82	0.835	0.0240886	0.810911	4.84773	0.0328378	31.0141	299.567	1.02229	0.828432	0.000341579	72.565	3.95198		6.26
C3	75.2	76.12	1.5	0.21	20.58	13	2354	205				30.87	2.73	535.484	0.855	0.0492897	0.80571	5.78812	0.0100327	28.9084	279.228	1.01403	0.986489	0.000333504	72.66	4.16135	4.28144	7.2
	75.26	76.08	1.47	0.22	20.52	13	2339	206				30.1644	2.86	558.808	0.845	0.045613	0.799387	5.43185	0.0115353	27.9396	269.87	1.03032	0.94674	0.000331447	72.67	4.28144		6.89
	75.33	76.05	1.5	0.19	20.83	13	2345	208				31.245	2.47	487.801	0.845	0.0541246	0.790875	5.85844	0.00743058	28.1126	271.541	0.99631	1.1073	0.000332213	72.69	4.26962		6.475
	75.36	76.18	1.48	0.2	20.55	13	2366	207				30.414	2.6	510.999	0.84	0.0499957	0.790004	5.55157	0.00866667	27.3364	264.043	1.03229	1.0451	0.000334651	72.77	4.44259		6.1
	75.08	76.15	1.49	0.2	20.43	13	2329	215				30.4407	2.6	511.026	0.845	0.0503348	0.794665	5.63178	0.00866667	27.6744	267.309	1.01904	1.08591	0.000332006	72.615	4.31666		6.475
	75.21	76.08	1.52	0.21	20.4	13	2372	208				31.008	2.73	535.622	0.865	0.0500762	0.814924	5.97007	0.0100327	29.6824	286.703	1.0171	1.00145	0.000336211	72.645	4.08237		6.89
	75.44	76.13	1.5	0.18	20.42	13	2328	207				30.63	2.34	463.157	0.84	0.0555518	0.784448	5.74313	0.006318	27.0942	261.704	1.00748	1.16198	0.0003294	72.785	4.41561		7.62
C4	75.04	76.01	1.5	0.22	20.6	8.45	2396	134				30.9	1.859	374.518	0.86	0.0709551	0.789045	5.79375	0.00749797	28.1478	271.881	1.03332	0.948319	0.000330524	72.525	4.20422	3.99156	6.47
	75.32	75.9	1.54	0.19	20.6	8.45	2360	132				31.724	1.6055	328.485	0.865	0.0835388	0.781461	6.26972	0.00482988	28.6068	276.314	0.987674	1.08323	0.000324437	72.61	4.07966		7.1
	75.38	76.02	1.56	0.2	20.85	8.45	2397	134				32.526	1.69	344.906	0.88	0.0829874	0.797013	6.59627	0.00563333	30.4503	294.121	0.977645	1.04301	0.000329239	72.7	3.9087		5.95
	75.33	75.95	1.54	0.22	20.45	8.45	2404	145				31.493	1.859	375.111	0.88	0.0738816	0.806118	6.22407	0.00749797	29.9506	289.295	1.01333	1.02698	0.000331794	72.64	3.99156		7.935
	75.26	76.01	1.56	0.23	20.55	8.45	2362	135				32.058	1.9435	391.295	0.895	0.0733254	0.821675	6.50136	0.0085676	31.6604	305.81	0.978992	0.913858	0.000325306	72.635	3.70113		8.19
	75.19	75.8	1.56	0.2	20.49	8.45	2390	134				31.9644	1.69	344.345	0.88	0.0816875	0.798312	6.48238	0.00563333	29.9791	289.57	0.994423	1.04604	0.000329164	72.495	3.92466		8.56
	75.16	75.99	1.53	0.19	20.43	8.45	2346	135				31.2579	1.6055	328.019	0.86	0.0819519	0.778048	6.09763	0.00482988	27.9057	269.543	0.998577	1.10654	0.000323632	72.575	4.16372		7.93
C5	75.6	75.94	1.35	0.22	21.47	4.55	2211	73				28.9845	1.001	214.01	0.785	0.106317	0.678683	4.40202	0.00403737	20.5903	198.882	1.00902	0.960325	0.000296334	72.77	5.22281	5.06711	11.25
	75.89	75.77	1.45	0.21	20.41	4.55	2274	71				29.5945	0.9555	206.21	0.83	0.119119	0.710881	5.1852	0.00351146	23.2959	225.017	1.0125	0.980687	0.000303143	72.83	4.73789		5.3
	75.73	75.85	1.43	0.21	20.4	4.55	2262	71				29.172	0.9555	205.787	0.82	0.116242	0.703758	4.97115	0.00351146	22.4548	216.892	1.0239	0.979653	0.0003022	72.79	4.88931		14.45
	75.63	75.92	1.4	0.23	20.41	4.55	2229	72				28.574	1.0465	222.01	0.815	0.104896	0.710104	4.66709	0.00461332	22.0566	213.046	1.03144	0.906227	0.000298428	72.775	4.9114		7.115
	75.88	75.88	1.36	0.22	21.03	4.55	2266	72				28.6008	1.001	213.626	0.79	0.105767	0.684233	4.40834	0.00403737	20.6146	199.117	1.04413	0.947919	0.000302264	72.88	5.35329		9.565
	75.6	75.89	1.36	0.2	20.48	4.55	2200	73				27.8528	0.91	196.058	0.78	0.11081	0.66919	4.29304	0.00303333	19.392	187.308	1.0448	1.05705	0.000294913	72.745	5.51136		16.36
total median (needed for analytical curve)	75.24	76.03	1.46	0.22	20.685	width_1			9.65905	1785.38												1.01511	0.993739
