# Supplementary material for: Development of a Material Design Space for 4D-Printed Bio-Inspired Hygroscopically Actuated Bilayer Structures with Unequal Effective Layer Widths
Source: Biomimetics (Basel). 2021 Oct 6;6(4):58. doi: 10.3390/biomimetics6040058 (PMC8544213; doi:10.3390/biomimetics6040058)
Supplement: Supplementary file 1 [file biomimetics-06-00058-s001.zip › Krueger_Thierer_et_al/Raw_Values_PLA_Monolayer.xlsx]

## Sheet: Deflection
	Deflection [mm] - measured in all states
Monolayer	wet state		humid state		dry state
Sample	F1		F1		F1
	3.8		3.39		2.68
	3.89		3.97		3.22
	2.07		3.39		3.31
	4.77		3.305		3.175
	4.64		3.08		2.595
	3.135		3.39		3.355
	3.565		2.63		2.28
	2.96		3.035		3.26
Median	3.6825		3.3475		3.1975
	0.98625		0.32125		0.61375
	F1
	3.8
	3.89
	4.77
	4.64
	3.135
	2.96
	3.845
	1.15125

## Sheet: Layer Length
	Layer Length [mm] - measured in all states
Monolayer	wet state		humid state		dry state			humid -change		dry - change
Sample	F1		F1		F1			F1		F1
	75.98		75.95		75.87			0.999605		0.998552
	75.99		75.99		75.92			1		0.999079
	75.59		75.64		75.61			1.00066		1.00026
	75.54		75.22		75.16			0.995764		0.99497
	75.66		75.62		75.58			0.999471		0.998943
	76.17		76.11		76.1			0.999212		0.999081
	75.69		75.61		75.54			0.998943		0.998018
	75.66		75.68		75.62			1.00026		0.999471
	76.07		76.08		75.99			1.00013		0.998948
	75.83		75.77		75.77			0.999209		0.999209
	75.31		75.15		75.16			0.997875		0.998008
	75.72		75.69		75.66			0.999604		0.999208
	75.96		75.94		75.92			0.999737		0.999473
	75.69		75.7		75.58			1.00013		0.998547
	75.2		75.27		75.44			1.00093		1.00319
	75.5		75.38		75.39			0.998411		0.998543
	75.83		75.8		75.74			0.999604		0.998813
	76.09		76.04		76			0.999343		0.998817
	75.8		75.81		75.68			1.00013		0.998417
	75.91		75.88		75.83			0.999605		0.998946
	75.81		75.84		75.78			1.0004		0.999604
	76.07		76.01		75.96			0.999211		0.998554
	75.93		75.88		75.88			0.999341		0.999341
	75.62		75.69		75.75			1.00093		1.00172
Median	75.805		75.785		75.745			0.999605		0.998947
IQR	0.315		0.3075		0.31			0.000919945		0.00082309

## Sheet: Layer Thickness
	Layer Thickness [mm] - measured in all states
Monolayer	wet state		humid state		dry state			humid -change		dry - change
Sample	F1		F1		F1			F1		F1
	0.26		0.26		0.25			1		0.961538
	0.25		0.26		0.25			1.04		1
	0.25		0.26		0.26			1.04		1.04
	0.25		0.25		0.25			1		1
	0.25		0.25		0.25			1		1
	0.25		0.25		0.26			1		1.04
	0.26		0.25		0.24			0.961538		0.923077
	0.26		0.26		0.26			1		1
	0.25		0.24		0.24			0.96		0.96
	0.24		0.24		0.24			1		1
	0.26		0.26		0.26			1		1
	0.24		0.24		0.24			1		1
	0.24		0.25		0.24			1.04167		1
	0.24		0.25		0.24			1.04167		1
	0.26		0.26		0.26			1		1
	0.26		0.26		0.26			1		1
	0.25		0.24		0.25			0.96		1
	0.25		0.25		0.25			1		1
	0.24		0.26		0.25			1.08333		1.04167
	0.24		0.25		0.23			1.04167		0.958333
	0.24		0.24		0.25			1		1.04167
	0.26		0.25		0.24			0.961538		0.923077
	0.24		0.24		0.24			1		1
	0.26		0.25		0.26			0.961538		1
Median	0.25		0.25		0.25			1		1
IQR	0.02		0.0125		0.02			0.01		0

## Sheet: Layer Width
	Layer Width [mm] - measured in all states
Monolayer	wet state		humid state		dry state			humid -change		dry - change
Sample	F1		F1		F1			F1		F1
	20.72		20.47		20.69			0.987934		0.998552
	20.5		20.48		20.49			0.999024		0.999512
	19.79		19.99		19.97			1.01011		1.0091
	19.84		19.82		19.82			0.998992		0.998992
	19.98		19.98		19.99			1		1.0005
	20.27		20.38		20.24			1.00543		0.99852
	20.12		20.1		20.11			0.999006		0.999503
	20.14		20.1		20.13			0.998014		0.999503
	20.21		20.21		20.32			1		1.00544
	19.97		19.92		19.94			0.997496		0.998498
	19.78		19.8		19.79			1.00101		1.00051
	20.14		20.14		20.12			1		0.999007
	20.6		20.36		20.58			0.98835		0.999029
	20		19.98		20			0.999		1
	20.08		20.1		20.06			1.001		0.999004
	20.01		20.02		20.01			1.0005		1
	20.69		20.64		20.63			0.997583		0.9971
	20.47		20.42		20.45			0.997557		0.999023
	20.15		20.33		20.17			1.00893		1.00099
	20.08		20.09		20.07			1.0005		0.999502
	20.39		20.33		20.39			0.997057		1
	20.16		20.17		20.14			1.0005		0.999008
	20.61		20.62		20.6			1.00049		0.999515
	20.14		20.11		20.1			0.99851		0.998014
Median	20.14		20.125		20.125			0.999512		0.999502
IQR	0.4025		0.3525		0.3975			0.00259217		0.000999028

## Sheet: Layer Weight
	Layer weight [mg] - measured in all states							Density (mg/mm^3) - measured in all states
Monolayer	wet state		humid state		dry state			wet state		humid state		dry state			Monolayer active Material humid - change		Monolayer active Material dry - change
Sample	F1		F1		F1			F1		F1		F1			F1		F1
	394		391		390			0.962573		0.967292		0.993789			1.0049		1.03243
	390		387		386			1.00142		0.956426		0.992543			0.955074		0.99114
	401		397		396			1.07225		1.00984		1.00871			0.9418		0.940742
	403		399		398			1.07559		1.07052		1.06869			0.99529		0.993588
	400		396		395			1.05842		1.04839		1.04577			0.990524		0.988051
	392		389		388			1.01557		1.00314		0.968865			0.987769		0.954014
	397		394		393			1.00265		1.03701		1.07793			1.03426		1.07508
	396		394		393			0.99953		0.996198		0.992976			0.996666		0.993442
	396		394		393			1.03033		1.0677		1.06048			1.03627		1.02926
	402		400		399			1.1061		1.10424		1.10037			0.998312		0.994818
	408		403		402			1.05344		1.04169		1.03949			0.988848		0.986762
	401		398		397			1.09563		1.08786		1.08664			0.992912		0.991795
	392		389		388			1.04381		1.00638		1.03471			0.964137		0.99128
	397		395		393			1.09272		1.04464		1.08329			0.955994		0.991365
	403		397		396			1.02648		1.00925		1.00644			0.983216		0.980481
	401		397		396			1.02089		1.01181		1.00963			0.991106		0.988972
	392		389		388			0.999412		1.036		0.99327			1.03661		0.993854
	397		391		390			1.01954		1.00725		1.00373			0.987947		0.984493
	404		400		399			1.10211		0.998212		1.04555			0.905726		0.948681
	399		397		395			1.09068		1.0417		1.12845			0.95509		1.03462
	394		392		391			1.06204		1.05935		1.0122			0.997465		0.953068
	395		392		391			0.990649		1.02275		1.06493			1.0324		1.07498
	396		388		387			1.05437		1.03325		1.03159			0.979968		0.978391
	404		398		396			1.02026		1.04591		1.00033			1.02513		0.980463
Median	397		394.5		393			1.03707		1.03462		1.03315			0.990815		0.99121
IQR	6.5		6.25		6			0.0607433		0.0394919		0.0629893			0.0239496		0.0136187

## Sheet: Flexural Modulus
	Measurements						Calculation of flexural modulus from analytical deflection of cantilever (static linear): w=1/8*q*L^4/EI
	Deflection	Length	Thickness	Width	Weight		A	I	L (minus clamping 3mm)	w	q	E
	mm	mm	mm	mm	mg		m^2	m^4	m	m	N/m	MPa	MEDIAN OF E	IQR
wet state	3.8	75.98	0.26	20.72	394		5.3872e-06	3.03479e-14	0.07298	0.0038	0.0529616	1628.45	1785.38	557.971
	3.89	75.99	0.25	20.5	390		5.125e-06	2.66927e-14	0.07299	0.00389	0.0524168	1790.98
	2.07	75.59	0.25	19.79	401		4.9475e-06	2.57682e-14	0.07259	0.00207	0.0541922	3526.13
	4.77	75.54	0.25	19.84	403		4.96e-06	2.58333e-14	0.07254	0.00477	0.0545	1530.8
	4.64	75.66	0.25	19.98	400		4.995e-06	2.60156e-14	0.07266	0.00464	0.054005	1558.74
	3.135	76.17	0.25	20.27	392		5.0675e-06	2.63932e-14	0.07317	0.003135	0.052556	2275.8
	3.565	75.69	0.26	20.12	397		5.2312e-06	2.94691e-14	0.07269	0.003565	0.0535778	1779.78
	2.96	75.66	0.26	20.14	396		5.2364e-06	2.94984e-14	0.07266	0.00296	0.0534649	2133.39
wet median
humid state	3.39	76.08	0.24	20.21	394		4.8504e-06	2.32819e-14	0.07308	0.00339	0.0528892	2389.2	2188.67	302.656
	3.97	75.77	0.24	19.92	400		4.7808e-06	2.29478e-14	0.07277	0.00397	0.0539233	2074.74
	3.39	75.15	0.26	19.8	403		5.148e-06	2.90004e-14	0.07215	0.00339	0.0547946	1887.95
	3.305	75.69	0.24	20.14	398		4.8336e-06	2.32013e-14	0.07269	0.003305	0.0537128	2444.57
	3.08	75.94	0.25	20.36	389		5.09e-06	2.65104e-14	0.07294	0.00308	0.0523182	2267.04
	3.39	75.7	0.25	19.98	395		4.995e-06	2.60156e-14	0.0727	0.00339	0.0533006	2110.31
	2.63	75.27	0.26	20.1	397		5.226e-06	2.94398e-14	0.07227	0.00263	0.0538892	2373.3
	3.035	75.38	0.26	20.02	397		5.2052e-06	2.93226e-14	0.07238	0.003035	0.0538073	2074.26
humid median
dry state	2.68	75.74	0.25	20.63	388		5.1575e-06	2.6862e-14	0.07274	0.00268	0.0523272	2543.65	2467.95	568.594
	3.22	76	0.25	20.45	390		5.1125e-06	2.66276e-14	0.073	0.00322	0.0524096	2169.82
	3.31	75.68	0.25	20.17	399		5.0425e-06	2.6263e-14	0.07268	0.00331	0.0538551	2160.85
	3.175	75.83	0.23	20.07	395		4.6161e-06	2.03493e-14	0.07283	0.003175	0.0532054	2896.1
	2.595	75.78	0.25	20.39	391		5.0975e-06	2.65495e-14	0.07278	0.002595	0.0527028	2682.86
	3.355	75.96	0.24	20.14	391		4.8336e-06	2.32013e-14	0.07296	0.003355	0.0525728	2392.25
	2.28	75.88	0.24	20.6	387		4.944e-06	2.37312e-14	0.07288	0.00228	0.0520921	3395.16
	3.26	75.75	0.26	20.1	396		5.226e-06	2.94398e-14	0.07275	0.00326	0.0533988	1948.14
dry median
													2165.33
