# Supplementary material for: Development of a Material Design Space for 4D-Printed Bio-Inspired Hygroscopically Actuated Bilayer Structures with Unequal Effective Layer Widths
Source: Biomimetics (Basel). 2021 Oct 6;6(4):58. doi: 10.3390/biomimetics6040058 (PMC8544213; doi:10.3390/biomimetics6040058)
Supplement: Supplementary file 1 [file biomimetics-06-00058-s001.zip › Krueger_Thierer_et_al/S2_Values_Laywood_monolayer.xlsx]

## Sheet: Deflection
	Deflection [mm] - measured in all states
Monolayer	wet state	3		humid state	2		dry state	2
Sample	F1	F2		F1	F2		F1	F2
	19.71	12.78		1.735	1.055		0.57	0.57
	16.875	12.98		1.73	1.31		0.505	0.505
	18.93	13.46		1.73	1.345		0.755	0.695
	14.425	12.975		1.83	1.055		0.635	0.76
	18.345	13.755		1.44	1.445		0.63	0.82
	20.095	16.68		1.73	1.44		0.825	0.76
	14.73	13.66		1.345	1.155		0.695	0.635
	19.805	13.855		1.25	0.77		0.695	0.315
Median	18.6375	13.56		1.73	1.2325		0.665	0.665

## Sheet: Curvature
	Deflection [mm] - measured in all states
Monolayer	wet state			humid state			dry state
Sample	F1	F2		F1	F2		F1	F2
	0	0		0	0		0	0
	0	0		0	0		0	0
	0	0		0	0		0	0
	0	0		0	0		0	0
	0	0		0	0		0	0
	0	0		0	0		0	0
	0	0		0	0		0	0
	0	0		0	0		0	0
Median	0	0		0	0		0	0

## Sheet: Layer Length
	Deflection [mm] - measured in all states
Monolayer	wet state	2		humid state	2		dry state	2
Sample	F1	F2		F1	F2		F1	F2
	75.41	75.69		73.74	73.64		72.88	72.8
	75.58	75.55		73.77	73.43		72.97	72.7
	75.72	75.51		73.72	73.64		73.03	72.92
	75.66	75.51		73.66	73.39		72.99	72.71
	75.39	75.55		73.48	73.47		72.73	72.74
	75.47	75.51		73.51	73.35		72.72	72.65
	75.35	75.43		73.6	73.53		72.95	73.02
	75.88	75.84		73.89	73.31		73.28	72.57
Median	75.525	75.53		73.69	73.45		72.96	72.725
				humid -change			dry - change
				F1	F2		F1	F2
				0.977854	0.972916		0.96645	0.961818
				0.976052	0.971939		0.965467	0.962277
				0.973587	0.975235		0.964474	0.9657
				0.973566	0.971924		0.964711	0.962919
				0.974665	0.972469		0.964717	0.962806
				0.974029	0.971395		0.963562	0.962124
				0.976775	0.974811		0.968149	0.96805
				0.973774	0.96664		0.965735	0.956883
				0.974347	0.972204		0.965092	0.962541

## Sheet: Layer Thickness
	Deflection [mm] - measured in all states
Monolayer	wet state	2		humid state	2		dry state	2
Sample	F1	F2		F1	F2		F1	F2
	1.89	1.85		1.9	1.71		1.82	1.72
	1.92	1.8		1.83	1.69		1.81	1.66
	1.92	1.81		1.87	1.69		1.84	1.72
	1.93	1.88		1.83	1.77		1.8	1.78
	1.89	1.83		1.81	1.69		1.77	1.66
	1.85	1.84		1.8	1.74		1.67	1.74
	1.87	1.81		1.8	1.7		1.8	1.67
	1.87	1.77		1.8	1.66		1.77	1.64
Median	1.89	1.82		1.82	1.695		1.8	1.695
				humid -change			dry - change
				F1	F2		F1	F2
				1.00529	0.924324		0.962963	0.92973
				0.953125	0.938889		0.942708	0.922222
				0.973958	0.933702		0.958333	0.950276
				0.948187	0.941489		0.932642	0.946809
				0.957672	0.923497		0.936508	0.907104
				0.972973	0.945652		0.902703	0.945652
				0.962567	0.939227		0.962567	0.922652
				0.962567	0.937853		0.946524	0.926554
				0.962567	0.938371		0.944616	0.928142

## Sheet: Layer Width
	Layer Width [mm] - measured in all states
Monolayer	wet state	2		humid state	2		dry state	2
Sample	F1	F2		F1	F2		F1	F2
	20.98	20.59		20.69	20.46		20.59	20.27
	20.3	21.35		20.12	21.19		19.97	20.98
	20.15	20.63		20.02	20.5		19.87	20.3
	20.33	20.46		20.15	20.36		19.97	20.11
	20.13	20.64		20.04	20.48		19.88	20.32
	20.86	20.59		20.72	20.47		20.57	20.24
	20.22	20.77		20.1	20.6		19.92	20.44
	20.2	21.28		20.1	21.12		19.9	20.96
Median	20.26	20.635		20.11	20.49		19.945	20.31
				humid -change			dry - change
				F1	F2		F1	F2
				0.986177	0.993686		0.981411	0.984458
				0.991133	0.992506		0.983744	0.98267
				0.993548	0.993698		0.986104	0.984004
				0.991146	0.995112		0.982292	0.982893
				0.995529	0.992248		0.987581	0.984496
				0.993289	0.994172		0.986098	0.983001
				0.994065	0.991815		0.985163	0.984112
				0.99505	0.992481		0.985149	0.984962
				0.993418	0.993096		0.985156	0.984058

## Sheet: Layer Weight
	Layer weight [mg] - measured in all states
Monolayer	wet state	2		humid state	2		dry state	2
Sample	F1	F2		F1	F2		F1	F2
	2927	2903		1545	1513		1476	1447
	2887	2946		1536	1519		1471	1456
	2958	2889		1535	1504		1469	1442
	2896	2961		1541	1513		1474	1449
	2841	2897		1518	1507		1454	1444
	2896	2913		1523	1494		1460	1430
	2796	2851		1519	1498		1453	1433
	2893	2910		1528	1516		1462	1453
Median	2894.5	2906.5		1531.5	1510		1465.5	1445.5
	Density (mg/mm^3) - measured in all states
	wet state			humid state			dry state
	F1	F2		F1	F2		F1	F2
	0.978873	1.00689		0.53298	0.587251		0.540443	0.570105
	0.980037	1.01468		0.5655	0.577652		0.557714	0.57506
	1.00974	1.02463		0.556183	0.589513		0.55018	0.566362
	0.975523	1.01946		0.567342	0.572072		0.561802	0.556727
	0.990494	1.0152		0.569543	0.592634		0.568148	0.588521
	0.994347	1.01827		0.555509	0.571852		0.584451	0.558908
	0.981366	1.0054		0.570442	0.581743		0.555493	0.574919
	1.00932	1.01871		0.57157	0.58984		0.566416	0.58247
	0.98593	1.01674		0.566421	0.584497		0.559758	0.572512
				Monolayer active Material humid - change			Monolayer active Material dry - change
				F1	F2		F1	F2
				0.544484	0.583234		0.552108	0.566206
				0.577018	0.569297		0.569074	0.566742
				0.550815	0.575345		0.544871	0.55275
				0.581577	0.561152		0.575899	0.546099
				0.575009	0.583759		0.5736	0.579707
				0.558667	0.561593		0.587774	0.548882
				0.581273	0.57862		0.56604	0.571833
				0.566293	0.579008		0.561187	0.571773
				0.570651	0.576982		0.567557	0.566474

## Sheet: Flexural Modulus
	Measurements						Calculation of flexural modulus from analytical deflection of cantilever (static linear): w=1/8*q*L^4/EI
Filament 1	Deflection	Length	Thickness	Width	Weight		A	I	L (minus clamping 3mm)	w	q	E				Bending Moment at clamped end	section modulus W	stress at clamped end	strain at clamped end
	mm	mm	mm	mm	mg		m^2	m^4	m	m	N/m	MPa	MEDIAN OF E			Nm	m^3	N/m^2		MEDIAN STRAIN
wet state	19.71	75.41	1.89	20.98	2927		3.96522e-05	1.18035e-11	0.07241	0.01971	0.396546	5.85735	6.33004	0.785022		-0.00103959	1.24904e-08	-83230.5	-0.0142096	-0.0134894
	16.875	75.58	1.92	20.3	2887		3.8976e-05	1.19734e-11	0.07258	0.016875	0.39021	6.69907				-0.00102779	1.24723e-08	-82405.4	-0.012301
	18.93	75.72	1.92	20.15	2958		3.8688e-05	1.1885e-11	0.07272	0.01893	0.399037	6.19999				-0.00105509	1.23802e-08	-85224.6	-0.0137459
	14.425	75.66	1.93	20.33	2896		3.92369e-05	1.21795e-11	0.07266	0.014425	0.390996	7.75389				-0.00103213	1.26212e-08	-81777.2	-0.0105466
	18.345	75.39	1.89	20.13	2841		3.80457e-05	1.13253e-11	0.07239	0.018345	0.385001	6.36093				-0.00100876	1.19844e-08	-84173	-0.0132328
	20.095	75.47	1.85	20.86	2896		3.8591e-05	1.10065e-11	0.07247	0.020095	0.392021	6.11105				-0.00102943	1.18989e-08	-86514.6	-0.0141571
	14.73	75.35	1.87	20.22	2796		3.78114e-05	1.10186e-11	0.07235	0.01473	0.379112	8.00026				-0.000992235	1.17846e-08	-84198	-0.0105244
	19.805	75.88	1.87	20.2	2893		3.7774e-05	1.10077e-11	0.07288	0.019805	0.389412	6.29916				-0.00103418	1.17729e-08	-87844.1	-0.0139454
wet median	18.6375	75.525	1.89	20.26	2894.5		3.82914e-05	1.13984e-11	0.072525	0.0186375	0.391521	6.3736	1.00688
humid state	1.735	73.74	1.9	20.69	1545		3.9311e-05	1.18261e-11	0.07074	0.001735	0.214256	32.6861	37.5678	11.3797		-0.000536084	1.24485e-08	-43064.2	-0.00131751	-0.00125847
	1.73	73.77	1.83	20.12	1536		3.68196e-05	1.02754e-11	0.07077	0.00173	0.212917	37.5553				-0.000533187	1.123e-08	-47478.9	-0.00126424
	1.73	73.72	1.87	20.02	1535		3.74374e-05	1.09096e-11	0.07072	0.00173	0.212929	35.2745				-0.000532463	1.1668e-08	-45634.5	-0.0012937
	1.83	73.66	1.83	20.15	1541		3.68745e-05	1.02908e-11	0.07066	0.00183	0.213943	35.4001				-0.000534091	1.12467e-08	-47488.6	-0.00134148
	1.44	73.48	1.81	20.04	1518		3.62724e-05	9.90267e-12	0.07048	0.00144	0.211288	45.7019				-0.000524779	1.09422e-08	-47959.3	-0.0010494
	1.73	73.51	1.8	20.72	1523		3.7296e-05	1.00699e-11	0.07051	0.00173	0.211894	37.5802				-0.000526732	1.11888e-08	-47076.7	-0.0012527
	1.345	73.6	1.8	20.1	1519		3.618e-05	9.7686e-12	0.0706	0.001345	0.211068	49.888				-0.000526019	1.0854e-08	-48463.2	-0.000971439
	1.25	73.89	1.8	20.1	1528		3.618e-05	9.7686e-12	0.07089	0.00125	0.21145	54.6657				-0.000531309	1.0854e-08	-48950.5	-0.000895453
humid median	1.73	73.69	1.82	20.11	1531.5		3.66002e-05	1.01029e-11	0.07069	0.00173	0.212534	37.9559	1.01033
dry state	0.57	72.88	1.82	20.59	1476		3.74738e-05	1.0344e-11	0.06988	0.00057	0.207206	104.751	98.9639	12.7773		-0.000505916	1.13671e-08	-44507.2	-0.000424884	-0.000482387
	0.505	72.97	1.81	19.97	1471		3.61457e-05	9.86808e-12	0.06997	0.000505	0.206239	123.995				-0.000504851	1.0904e-08	-46299.9	-0.000373402
	0.755	73.03	1.84	19.87	1469		3.65608e-05	1.0315e-11	0.07003	0.000755	0.205782	79.4394				-0.000504597	1.1212e-08	-45005.2	-0.000566535
	0.635	72.99	1.8	19.97	1474		3.5946e-05	9.70542e-12	0.06999	0.000635	0.2066	100.553				-0.000506026	1.07838e-08	-46924.6	-0.000466664
	0.63	72.73	1.77	19.88	1454		3.51876e-05	9.1866e-12	0.06973	0.00063	0.204557	104.45				-0.000497305	1.03803e-08	-47908.4	-0.000458674
	0.825	72.72	1.67	20.57	1460		3.43519e-05	7.98367e-12	0.06972	0.000825	0.20543	92.1187				-0.000499286	9.56128e-09	-52219.6	-0.000566873
	0.695	72.95	1.8	19.92	1453		3.5856e-05	9.68112e-12	0.06995	0.000695	0.203773	90.6353				-0.000498531	1.07568e-08	-46345.7	-0.000511342
	0.695	73.28	1.77	19.9	1462		3.5223e-05	9.19584e-12	0.07028	0.000695	0.204073	97.3745				-0.000503986	1.03908e-08	-48503.1	-0.000498109
dry median	0.665	72.96	1.8	19.945	1465.5		3.5901e-05	9.69327e-12	0.06996	0.000665	0.205497	95.4602	0.964596
Filament 2	Deflection	Length	Thickness	Width	Weight		A	I	L (minus clamping 3mm)	w	q	E				Bending Moment at clamped end	section modulus W	stress at clamped end	strain at clamped end
	mm	mm	mm	mm	mg		m^2	m^4	m	m	N/m	MPa	MEDIAN OF E			Nm	m^3	N/m^2		MEDIAN STRAIN
wet state	12.78	75.69	1.85	20.59	2903		3.80915e-05	1.0864e-11	0.07269	0.01278	0.391779	9.84757	9.65905	0.514488		-0.00103505	1.17449e-08	-88127.6	-0.00894918	-0.00927318
	12.98	75.55	1.8	21.35	2946		3.843e-05	1.03761e-11	0.07255	0.01298	0.39835	10.2427				-0.00104836	1.1529e-08	-90932.2	-0.00887774
	13.46	75.51	1.81	20.63	2889		3.73403e-05	1.01942e-11	0.07251	0.01346	0.390858	9.84286				-0.00102751	1.12643e-08	-91217.7	-0.0092674
	12.975	75.51	1.88	20.46	2961		3.84648e-05	1.13292e-11	0.07251	0.012975	0.400599	9.41685				-0.00105311	1.20523e-08	-87378.6	-0.00927896
	13.755	75.55	1.83	20.64	2897		3.77712e-05	1.0541e-11	0.07255	0.013755	0.391724	9.35616				-0.00103092	1.15202e-08	-89487.9	-0.0095646
	16.68	75.51	1.84	20.59	2913		3.78856e-05	1.06888e-11	0.07251	0.01668	0.394105	7.63816				-0.00103604	1.16183e-08	-89173.7	-0.0116748
	13.66	75.43	1.81	20.77	2851		3.75937e-05	1.02634e-11	0.07243	0.01366	0.386143	9.47524				-0.00101287	1.13408e-08	-89312.5	-0.00942589
	13.855	75.84	1.77	21.28	2910		3.76656e-05	9.83355e-12	0.07284	0.013855	0.391915	10.122				-0.00103969	1.11114e-08	-93569.7	-0.00924421
wet median	13.56	75.53	1.82	20.635	2906.5		3.75557e-05	1.03666e-11	0.07253	0.01356	0.393117	9.67398	1.00155
humid state	1.055	73.64	1.71	20.46	1513		3.49866e-05	8.52536e-12	0.07064	0.001055	0.210115	72.7118	61.9036	10.5051		-0.000524238	9.97118e-09	-52575.3	-0.000723065	-0.000841031
	1.31	73.43	1.69	21.19	1519		3.58111e-05	8.52334e-12	0.07043	0.00131	0.211577	58.2812				-0.000524752	1.00868e-08	-52023.7	-0.000892632
	1.345	73.64	1.69	20.5	1504		3.4645e-05	8.2458e-12	0.07064	0.001345	0.208865	58.617				-0.00052112	9.75834e-09	-53402.5	-0.00091104
	1.055	73.39	1.77	20.36	1513		3.60372e-05	9.40841e-12	0.07039	0.001055	0.210861	65.1902				-0.000522383	1.0631e-08	-49137.8	-0.000753761
	1.445	73.47	1.69	20.48	1507		3.46112e-05	8.23775e-12	0.07047	0.001445	0.209787	54.3286				-0.000520903	9.74882e-09	-53432.4	-0.000983504
	1.44	73.35	1.74	20.47	1494		3.56178e-05	8.98637e-12	0.07035	0.00144	0.208332	49.2918				-0.00051553	1.03292e-08	-49910.1	-0.00101254
	1.155	73.53	1.7	20.6	1498		3.502e-05	8.43398e-12	0.07053	0.001155	0.208356	66.1603				-0.000518233	9.92233e-09	-52228.9	-0.000789429
	0.77	73.31	1.66	21.12	1516		3.50592e-05	8.05076e-12	0.07031	0.00077	0.21152	104.232				-0.000522824	9.69971e-09	-53901	-0.000517124
humid median	1.2325	73.45	1.695	20.49	1510		3.47305e-05	8.31514e-12	0.07045	0.0012325	0.210264	63.1746	1.02053
dry state	0.57	72.8	1.72	20.27	1447		3.48644e-05	8.59524e-12	0.0698	0.00057	0.203368	123.163	110.391	36.9403		-0.000495408	9.99446e-09	-49568.2	-0.00040246	-0.000460813
	0.505	72.7	1.66	20.98	1456		3.48268e-05	7.99739e-12	0.0697	0.000505	0.204926	149.692				-0.000497775	9.63541e-09	-51661	-0.000345115
	0.695	72.92	1.72	20.3	1442		3.4916e-05	8.60796e-12	0.06992	0.000695	0.202317	101.033				-0.000494545	1.00093e-08	-49408.8	-0.000489036
	0.76	72.71	1.78	20.11	1449		3.57958e-05	9.45128e-12	0.06971	0.00076	0.203912	83.797				-0.000495453	1.06194e-08	-46655.4	-0.000556767
	0.82	72.74	1.66	20.32	1444		3.37312e-05	7.74581e-12	0.06974	0.00082	0.203121	94.5609				-0.000493956	9.3323e-09	-52929.7	-0.000559742
	0.76	72.65	1.74	20.24	1430		3.52176e-05	8.8854e-12	0.06965	0.00076	0.201411	87.738				-0.000488536	1.02131e-08	-47834.2	-0.000545193
	0.635	73.02	1.67	20.44	1433		3.41348e-05	7.93321e-12	0.07002	0.000635	0.200767	119.748				-0.000492161	9.50085e-09	-51801.8	-0.00043259
	0.315	72.57	1.64	20.96	1453		3.43744e-05	7.70445e-12	0.06957	0.000315	0.204886	247.206				-0.000495823	9.39567e-09	-52771.4	-0.000213472
dry median	0.665	72.725	1.695	20.31	1445.5		3.44255e-05	8.2421e-12	0.069725	0.000665	0.203375	109.623	0.99305
